# Supplementary material for: Hanging drop sample preparation improves sensitivity of spatial proteomics
Source: Lab Chip. 2022 Jul 12;22(15):2869–77. doi: 10.1039/d2lc00384h (PMC9320080; doi:10.1039/d2lc00384h)
Supplement: LC-022-D2LC00384H-s002 [file LC-022-D2LC00384H-s002.xlsx]

## Sheet: Table_S1
Protein	Protein ID	Entry Name	Gene	Protein Length	Coverage	Organism	Protein Existence	Description	Protein Probability	Top Peptide Probability	Combined Total Peptides	Combined Spectral Count	Combined Unique Spectral Count	Combined Total Spectral Count	100um_1 Spectral Count	100um_2 Spectral Count	100um_3 Spectral Count	100um_4 Spectral Count	200um_1 Spectral Count	200um_2 Spectral Count	200um_3 Spectral Count	200um_sit_1 Spectral Count	200um_sit_2 Spectral Count	200um_sit_3 Spectral Count	50um_1 Spectral Count	50um_2 Spectral Count	50um_3 Spectral Count	50um_4 Spectral Count	100um_1 Unique Spectral Count	100um_2 Unique Spectral Count	100um_3 Unique Spectral Count	100um_4 Unique Spectral Count	200um_1 Unique Spectral Count	200um_2 Unique Spectral Count	200um_3 Unique Spectral Count	200um_sit_1 Unique Spectral Count	200um_sit_2 Unique Spectral Count	200um_sit_3 Unique Spectral Count	50um_1 Unique Spectral Count	50um_2 Unique Spectral Count	50um_3 Unique Spectral Count	50um_4 Unique Spectral Count	100um_1 Total Spectral Count	100um_2 Total Spectral Count	100um_3 Total Spectral Count	100um_4 Total Spectral Count	200um_1 Total Spectral Count	200um_2 Total Spectral Count	200um_3 Total Spectral Count
sp|A0JNU3|LPP60_MOUSE	A0JNU3	LPP60_MOUSE	Aspg	564	14.9	Mus musculus OX=10090	1:Experimental evidence at protein level	60 kDa lysophospholipase	1	0.999	7	22	22	22	3	2	2	0	5	2	3	0	3	2	0	0	0	0	3	2	2	0	5	2	3	0	3	2	0	0	0	0	3	2	2	0	5	2	3
sp|A2A432|CUL4B_MOUSE	A2A432	CUL4B_MOUSE	Cul4b	970	7.2	Mus musculus OX=10090	1:Experimental evidence at protein level	Cullin-4B	1	0.999	6	10	6	10	0	0	0	0	2	5	3	0	0	0	0	0	0	0	0	0	0	0	2	3	1	0	0	0	0	0	0	0	0	0	0	0	2	5	3
sp|A2A5R2|BIG2_MOUSE	A2A5R2	BIG2_MOUSE	Arfgef2	1792	4.5	Mus musculus OX=10090	1:Experimental evidence at protein level	Brefeldin A-inhibited guanine nucleotide-exchange protein 2	1	0.999	4	6	6	6	0	0	0	0	0	4	1	0	1	0	0	0	0	0	0	0	0	0	0	4	1	0	1	0	0	0	0	0	0	0	0	0	0	4	1
sp|A2A8L5|PTPRF_MOUSE	A2A8L5	PTPRF_MOUSE	Ptprf	1898	1.7	Mus musculus OX=10090	1:Experimental evidence at protein level	Receptor-type tyrosine-protein phosphatase F	1	0.999	3	7	7	7	0	0	0	0	2	3	2	0	0	0	0	0	0	0	0	0	0	0	2	3	2	0	0	0	0	0	0	0	0	0	0	0	2	3	2
sp|A2AJL3|FGGY_MOUSE	A2AJL3	FGGY_MOUSE	Fggy	552	17.6	Mus musculus OX=10090	1:Experimental evidence at protein level	FGGY carbohydrate kinase domain-containing protein	1	0.999	7	42	42	42	4	3	3	3	6	7	6	2	3	4	0	0	1	0	4	3	3	3	6	7	6	2	3	4	0	0	1	0	4	3	3	3	6	7	6
sp|A2AKK5|ACNT1_MOUSE	A2AKK5	ACNT1_MOUSE	Acnat1	416	20.9	Mus musculus OX=10090	1:Experimental evidence at protein level	Acyl-coenzyme A amino acid N-acyltransferase 1	1	0.999	7	7	7	43	1	0	0	0	2	2	1	0	1	0	0	0	0	0	1	0	0	0	2	2	1	0	1	0	0	0	0	0	5	4	3	3	6	7	7
sp|A2AN08|UBR4_MOUSE	A2AN08	UBR4_MOUSE	Ubr4	5180	3.5	Mus musculus OX=10090	1:Experimental evidence at protein level	E3 ubiquitin-protein ligase UBR4	1	0.999	9	17	17	17	0	0	0	1	8	4	3	0	0	0	0	0	1	0	0	0	0	1	8	4	3	0	0	0	0	0	1	0	0	0	0	1	8	4	3
sp|A2AS89|SPEB_MOUSE	A2AS89	SPEB_MOUSE	Agmat	358	31.3	Mus musculus OX=10090	1:Experimental evidence at protein level	Agmatinase, mitochondrial	1	0.999	10	81	81	81	6	7	6	7	9	9	10	5	7	6	2	1	3	3	6	7	6	7	9	9	10	5	7	6	2	1	3	3	6	7	6	7	9	9	10
sp|A2ATU0|DHTK1_MOUSE	A2ATU0	DHTK1_MOUSE	Dhtkd1	921	5.9	Mus musculus OX=10090	1:Experimental evidence at protein level	Probable 2-oxoglutarate dehydrogenase E1 component DHKTD1, mitochondrial	1	0.999	4	16	16	16	2	2	3	1	2	2	2	1	1	0	0	0	0	0	2	2	3	1	2	2	2	1	1	0	0	0	0	0	2	2	3	1	2	2	2
sp|A3KMP2|TTC38_MOUSE	A3KMP2	TTC38_MOUSE	Ttc38	465	26.2	Mus musculus OX=10090	1:Experimental evidence at protein level	Tetratricopeptide repeat protein 38	1	0.999	11	57	57	57	4	4	3	4	8	6	8	5	6	3	1	1	2	2	4	4	3	4	8	6	8	5	6	3	1	1	2	2	4	4	3	4	8	6	8
sp|A6X935|ITIH4_MOUSE	A6X935	ITIH4_MOUSE	Itih4	942	15.4	Mus musculus OX=10090	1:Experimental evidence at protein level	Inter alpha-trypsin inhibitor, heavy chain 4	1	0.999	10	33	33	33	1	1	1	0	7	7	10	0	3	3	0	0	0	0	1	1	1	0	7	7	10	0	3	3	0	0	0	0	1	1	1	0	7	7	10
sp|B2RQC6|PYR1_MOUSE	B2RQC6	PYR1_MOUSE	Cad	2225	4.9	Mus musculus OX=10090	1:Experimental evidence at protein level	CAD protein	1	0.999	6	5	5	97	0	0	0	0	3	1	1	0	0	0	0	0	0	0	0	0	0	0	3	1	1	0	0	0	0	0	0	0	7	8	7	7	9	8	8
sp|B2RY56|RBM25_MOUSE	B2RY56	RBM25_MOUSE	Rbm25	838	9.1	Mus musculus OX=10090	1:Experimental evidence at protein level	RNA-binding protein 25	1	0.999	5	14	14	14	0	0	1	0	3	5	1	1	1	1	1	0	0	0	0	0	1	0	3	5	1	1	1	1	1	0	0	0	0	0	1	0	3	5	1
sp|B9EJ86|OSBL8_MOUSE	B9EJ86	OSBL8_MOUSE	Osbpl8	889	7.9	Mus musculus OX=10090	1:Experimental evidence at protein level	Oxysterol-binding protein-related protein 8	1	0.999	5	5	5	5	0	0	1	0	1	1	2	0	0	0	0	0	0	0	0	0	1	0	1	1	2	0	0	0	0	0	0	0	0	0	1	0	1	1	2
sp|E9PV24|FIBA_MOUSE	E9PV24	FIBA_MOUSE	Fga	789	34.9	Mus musculus OX=10090	1:Experimental evidence at protein level	Fibrinogen alpha chain	1	0.999	27	198	198	198	15	16	11	15	27	25	25	16	13	17	8	2	3	5	15	16	11	15	27	25	25	16	13	17	8	2	3	5	15	16	11	15	27	25	25
sp|E9PVA8|GCN1_MOUSE	E9PVA8	GCN1_MOUSE	Gcn1	2671	5.2	Mus musculus OX=10090	1:Experimental evidence at protein level	eIF-2-alpha kinase activator GCN1	1	0.999	11	25	25	25	1	0	0	0	9	7	6	1	1	0	0	0	0	0	1	0	0	0	9	7	6	1	1	0	0	0	0	0	1	0	0	0	9	7	6
sp|E9Q137|TX264_MOUSE	E9Q137	TX264_MOUSE	Tex264	309	18.1	Mus musculus OX=10090	2:Experimental evidence at transcript level	Testis-expressed protein 264 homolog	1	0.999	3	7	7	7	0	0	0	0	1	4	1	1	0	0	0	0	0	0	0	0	0	0	1	4	1	1	0	0	0	0	0	0	0	0	0	0	1	4	1
sp|E9Q3C1|C2CD2_MOUSE	E9Q3C1	C2CD2_MOUSE	C2cd2	696	6	Mus musculus OX=10090	1:Experimental evidence at protein level	C2 domain-containing protein 2	1	0.999	4	7	7	7	0	0	0	0	3	1	2	1	0	0	0	0	0	0	0	0	0	0	3	1	2	1	0	0	0	0	0	0	0	0	0	0	3	1	2
sp|E9Q3L2|PI4KA_MOUSE	E9Q3L2	PI4KA_MOUSE	Pi4ka	2105	2	Mus musculus OX=10090	1:Experimental evidence at protein level	Phosphatidylinositol 4-kinase alpha	1	0.999	3	7	7	7	0	0	0	0	3	2	2	0	0	0	0	0	0	0	0	0	0	0	3	2	2	0	0	0	0	0	0	0	0	0	0	0	3	2	2
sp|E9Q414|APOB_MOUSE	E9Q414	APOB_MOUSE	Apob	4505	10.1	Mus musculus OX=10090	1:Experimental evidence at protein level	Apolipoprotein B-100	1	0.999	35	107	107	107	7	8	8	10	17	17	21	3	7	9	0	0	0	0	7	8	8	10	17	17	21	3	7	9	0	0	0	0	7	8	8	10	17	17	21
sp|E9Q4Z2|ACACB_MOUSE	E9Q4Z2	ACACB_MOUSE	Acacb	2448	9.4	Mus musculus OX=10090	1:Experimental evidence at protein level	Acetyl-CoA carboxylase 2	1	0.999	18	36	36	57	1	3	1	2	10	9	10	0	0	0	0	0	0	0	1	3	1	2	10	9	10	0	0	0	0	0	0	0	2	5	2	3	13	13	14
sp|E9Q555|RN213_MOUSE	E9Q555	RN213_MOUSE	Rnf213	5148	1.9	Mus musculus OX=10090	1:Experimental evidence at protein level	E3 ubiquitin-protein ligase RNF213	1	0.999	7	10	10	10	0	1	0	0	7	1	1	0	0	0	0	0	0	0	0	1	0	0	7	1	1	0	0	0	0	0	0	0	0	1	0	0	7	1	1
sp|E9Q557|DESP_MOUSE	E9Q557	DESP_MOUSE	Dsp	2883	10.6	Mus musculus OX=10090	1:Experimental evidence at protein level	Desmoplakin	1	0.999	29	76	76	76	5	5	2	2	16	13	14	3	11	5	0	0	0	0	5	5	2	2	16	13	14	3	11	5	0	0	0	0	5	5	2	2	16	13	14
sp|E9Q5C9|NOLC1_MOUSE	E9Q5C9	NOLC1_MOUSE	Nolc1	702	9.8	Mus musculus OX=10090	1:Experimental evidence at protein level	Nucleolar and coiled-body phosphoprotein 1	1	0.999	5	13	13	13	0	1	0	1	2	3	4	1	1	0	0	0	0	0	0	1	0	1	2	3	4	1	1	0	0	0	0	0	0	1	0	1	2	3	4
sp|E9Q7G0|NUMA1_MOUSE	E9Q7G0	NUMA1_MOUSE	Numa1	2094	10.6	Mus musculus OX=10090	1:Experimental evidence at protein level	Nuclear mitotic apparatus protein 1	1	0.999	15	30	30	30	0	1	0	0	9	7	10	0	2	1	0	0	0	0	0	1	0	0	9	7	10	0	2	1	0	0	0	0	0	1	0	0	9	7	10
sp|E9Q912|GDS1_MOUSE	E9Q912	GDS1_MOUSE	Rap1gds1	607	4.9	Mus musculus OX=10090	2:Experimental evidence at transcript level	Rap1 GTPase-GDP dissociation stimulator 1	1	0.999	2	6	6	6	0	0	0	0	2	2	2	0	0	0	0	0	0	0	0	0	0	0	2	2	2	0	0	0	0	0	0	0	0	0	0	0	2	2	2
sp|E9QAM5|HELZ2_MOUSE	E9QAM5	HELZ2_MOUSE	Helz2	2947	2.5	Mus musculus OX=10090	1:Experimental evidence at protein level	Helicase with zinc finger domain 2	1	0.999	6	13	13	13	0	0	0	0	6	3	4	0	0	0	0	0	0	0	0	0	0	0	6	3	4	0	0	0	0	0	0	0	0	0	0	0	6	3	4
sp|E9QAT4|SC16A_MOUSE	E9QAT4	SC16A_MOUSE	Sec16a	2357	4.9	Mus musculus OX=10090	1:Experimental evidence at protein level	Protein transport protein Sec16A	1	0.999	7	12	12	12	0	0	0	1	5	2	4	0	0	0	0	0	0	0	0	0	0	1	5	2	4	0	0	0	0	0	0	0	0	0	0	1	5	2	4
sp|F6ZDS4|TPR_MOUSE	F6ZDS4	TPR_MOUSE	Tpr	2431	7.7	Mus musculus OX=10090	1:Experimental evidence at protein level	Nucleoprotein TPR	1	0.999	15	30	30	30	0	0	0	2	10	8	9	0	0	1	0	0	0	0	0	0	0	2	10	8	9	0	0	1	0	0	0	0	0	0	0	2	10	8	9
sp|G3X982|AOXC_MOUSE	G3X982	AOXC_MOUSE	Aox3	1335	15.5	Mus musculus OX=10090	1:Experimental evidence at protein level	Aldehyde oxidase 3	1	0.999	17	73	61	73	3	4	4	8	6	10	9	9	8	10	1	0	1	0	2	3	3	7	5	9	8	8	7	9	0	0	0	0	3	4	4	8	6	10	9
sp|G5E8V9|ARFP1_MOUSE	G5E8V9	ARFP1_MOUSE	Arfip1	373	7.2	Mus musculus OX=10090	1:Experimental evidence at protein level	Arfaptin-1	1	0.999	2	7	7	7	0	0	0	0	2	2	1	0	1	1	0	0	0	0	0	0	0	0	2	2	1	0	1	1	0	0	0	0	0	0	0	0	2	2	1
sp|O08529|CAN2_MOUSE	O08529	CAN2_MOUSE	Capn2	700	4.4	Mus musculus OX=10090	1:Experimental evidence at protein level	Calpain-2 catalytic subunit	1	0.999	4	8	8	8	0	1	0	1	3	1	0	0	1	1	0	0	0	0	0	1	0	1	3	1	0	0	1	1	0	0	0	0	0	1	0	1	3	1	0
sp|O08539|BIN1_MOUSE	O08539	BIN1_MOUSE	Bin1	588	4.9	Mus musculus OX=10090	1:Experimental evidence at protein level	Myc box-dependent-interacting protein 1	1	0.999	2	12	12	12	0	0	0	0	4	4	4	0	0	0	0	0	0	0	0	0	0	0	4	4	4	0	0	0	0	0	0	0	0	0	0	0	4	4	4
sp|O08547|SC22B_MOUSE	O08547	SC22B_MOUSE	Sec22b	215	42.8	Mus musculus OX=10090	1:Experimental evidence at protein level	Vesicle-trafficking protein SEC22b	1	0.999	9	53	53	53	3	4	4	4	10	5	7	5	4	4	0	0	2	1	3	4	4	4	10	5	7	5	4	4	0	0	2	1	3	4	4	4	10	5	7
sp|O08573|LEG9_MOUSE	O08573	LEG9_MOUSE	Lgals9	353	34	Mus musculus OX=10090	1:Experimental evidence at protein level	Galectin-9	1	0.999	10	89	89	89	7	8	7	9	14	11	12	5	3	5	2	2	2	2	7	8	7	9	14	11	12	5	3	5	2	2	2	2	7	8	7	9	14	11	12
sp|O08585|CLCA_MOUSE	O08585	CLCA_MOUSE	Clta	235	17.4	Mus musculus OX=10090	1:Experimental evidence at protein level	Clathrin light chain A	1	0.999	6	47	47	47	4	5	3	4	5	5	5	3	3	3	2	1	2	2	4	5	3	4	5	5	5	3	3	3	2	1	2	2	4	5	3	4	5	5	5
sp|O08600|NUCG_MOUSE	O08600	NUCG_MOUSE	Endog	294	20.4	Mus musculus OX=10090	1:Experimental evidence at protein level	Endonuclease G, mitochondrial	1	0.999	5	14	14	14	1	2	0	0	3	3	2	0	2	1	0	0	0	0	1	2	0	0	3	3	2	0	2	1	0	0	0	0	1	2	0	0	3	3	2
sp|O08601|MTP_MOUSE	O08601	MTP_MOUSE	Mttp	894	46.5	Mus musculus OX=10090	1:Experimental evidence at protein level	Microsomal triglyceride transfer protein large subunit	1	0.999	39	296	296	296	18	18	22	24	36	39	33	18	22	18	13	7	15	13	18	18	22	24	36	39	33	18	22	18	13	7	15	13	18	18	22	24	36	39	33
sp|O08663|MAP2_MOUSE	O08663	MAP2_MOUSE	Metap2	478	9	Mus musculus OX=10090	1:Experimental evidence at protein level	Methionine aminopeptidase 2	1	0.999	4	9	9	9	0	0	0	0	3	2	1	1	1	1	0	0	0	0	0	0	0	0	3	2	1	1	1	1	0	0	0	0	0	0	0	0	3	2	1
sp|O08677|KNG1_MOUSE	O08677	KNG1_MOUSE	Kng1	661	11.3	Mus musculus OX=10090	1:Experimental evidence at protein level	Kininogen-1	1	0.999	8	37	37	37	3	2	4	4	5	4	4	4	3	4	0	0	0	0	3	2	4	4	5	4	4	4	3	4	0	0	0	0	3	2	4	4	5	4	4
sp|O08709|PRDX6_MOUSE	O08709	PRDX6_MOUSE	Prdx6	224	79.9	Mus musculus OX=10090	1:Experimental evidence at protein level	Peroxiredoxin-6	1	0.999	16	148	148	148	10	11	11	10	17	15	16	14	15	13	4	4	5	3	10	11	11	10	17	15	16	14	15	13	4	4	5	3	10	11	11	10	17	15	16
sp|O08715|AKAP1_MOUSE	O08715	AKAP1_MOUSE	Akap1	857	10.6	Mus musculus OX=10090	1:Experimental evidence at protein level	A-kinase anchor protein 1, mitochondrial	1	0.999	6	12	12	12	1	1	0	0	5	3	2	0	0	0	0	0	0	0	1	1	0	0	5	3	2	0	0	0	0	0	0	0	1	1	0	0	5	3	2
sp|O08749|DLDH_MOUSE	O08749	DLDH_MOUSE	Dld	509	40.7	Mus musculus OX=10090	1:Experimental evidence at protein level	Dihydrolipoyl dehydrogenase, mitochondrial	1	0.999	19	130	130	130	8	8	9	9	15	15	13	12	15	12	5	3	3	3	8	8	9	9	15	15	13	12	15	12	5	3	3	3	8	8	9	9	15	15	13
sp|O08756|HCD2_MOUSE	O08756	HCD2_MOUSE	Hsd17b10	261	67	Mus musculus OX=10090	1:Experimental evidence at protein level	3-hydroxyacyl-CoA dehydrogenase type-2	1	0.999	11	124	124	124	9	8	12	10	13	14	11	10	9	9	5	5	5	4	9	8	12	10	13	14	11	10	9	9	5	5	5	4	9	8	12	10	13	14	11
sp|O08759|UBE3A_MOUSE	O08759	UBE3A_MOUSE	Ube3a	870	2.8	Mus musculus OX=10090	1:Experimental evidence at protein level	Ubiquitin-protein ligase E3A	1	0.999	2	4	4	4	0	0	0	0	1	2	1	0	0	0	0	0	0	0	0	0	0	0	1	2	1	0	0	0	0	0	0	0	0	0	0	0	1	2	1
sp|O08784|TCOF_MOUSE	O08784	TCOF_MOUSE	Tcof1	1320	2.6	Mus musculus OX=10090	1:Experimental evidence at protein level	Treacle protein	1	0.9989	2	3	3	3	0	0	0	0	2	1	0	0	0	0	0	0	0	0	0	0	0	0	2	1	0	0	0	0	0	0	0	0	0	0	0	0	2	1	0
sp|O08788|DCTN1_MOUSE	O08788	DCTN1_MOUSE	Dctn1	1281	5	Mus musculus OX=10090	1:Experimental evidence at protein level	Dynactin subunit 1	1	0.999	5	14	14	14	1	0	1	0	3	4	5	0	0	0	0	0	0	0	1	0	1	0	3	4	5	0	0	0	0	0	0	0	1	0	1	0	3	4	5
sp|O08795|GLU2B_MOUSE	O08795	GLU2B_MOUSE	Prkcsh	521	20.3	Mus musculus OX=10090	1:Experimental evidence at protein level	Glucosidase 2 subunit beta	1	0.999	11	62	62	62	5	6	6	7	9	6	6	3	6	8	0	0	0	0	5	6	6	7	9	6	6	3	6	8	0	0	0	0	5	6	6	7	9	6	6
sp|O08807|PRDX4_MOUSE	O08807	PRDX4_MOUSE	Prdx4	274	39.4	Mus musculus OX=10090	1:Experimental evidence at protein level	Peroxiredoxin-4	1	0.999	11	96	92	111	8	9	10	9	8	9	11	6	6	5	3	4	4	4	7	9	9	8	8	9	11	5	6	5	3	4	4	4	9	10	11	10	9	10	12
sp|O08808|DIAP1_MOUSE	O08808	DIAP1_MOUSE	Diaph1	1255	6.2	Mus musculus OX=10090	1:Experimental evidence at protein level	Protein diaphanous homolog 1	1	0.999	6	9	9	9	1	1	0	0	2	2	2	0	1	0	0	0	0	0	1	1	0	0	2	2	2	0	1	0	0	0	0	0	1	1	0	0	2	2	2
sp|O08810|U5S1_MOUSE	O08810	U5S1_MOUSE	Eftud2	971	9.6	Mus musculus OX=10090	1:Experimental evidence at protein level	116 kDa U5 small nuclear ribonucleoprotein component	1	0.999	6	9	9	23	0	0	0	0	3	3	3	0	0	0	0	0	0	0	0	0	0	0	3	3	3	0	0	0	0	0	0	0	1	1	1	1	4	4	4
sp|O08914|FAAH1_MOUSE	O08914	FAAH1_MOUSE	Faah	579	8.5	Mus musculus OX=10090	1:Experimental evidence at protein level	Fatty-acid amide hydrolase 1	1	0.999	3	16	16	16	0	0	0	1	2	3	3	3	2	2	0	0	0	0	0	0	0	1	2	3	3	3	2	2	0	0	0	0	0	0	0	1	2	3	3
sp|O08917|FLOT1_MOUSE	O08917	FLOT1_MOUSE	Flot1	428	18.9	Mus musculus OX=10090	1:Experimental evidence at protein level	Flotillin-1	1	0.999	4	12	12	12	0	0	0	1	1	2	1	3	1	3	0	0	0	0	0	0	0	1	1	2	1	3	1	3	0	0	0	0	0	0	0	1	1	2	1
sp|O09012|PEX5_MOUSE	O09012	PEX5_MOUSE	Pex5	639	8.3	Mus musculus OX=10090	1:Experimental evidence at protein level	Peroxisomal targeting signal 1 receptor	1	0.999	4	13	13	13	1	1	1	0	1	1	3	1	2	2	0	0	0	0	1	1	1	0	1	1	3	1	2	2	0	0	0	0	1	1	1	0	1	1	3
sp|O09044|SNP23_MOUSE	O09044	SNP23_MOUSE	Snap23	210	16.7	Mus musculus OX=10090	1:Experimental evidence at protein level	Synaptosomal-associated protein 23	1	0.999	3	9	9	9	0	0	0	1	3	1	2	1	1	0	0	0	0	0	0	0	0	1	3	1	2	1	1	0	0	0	0	0	0	0	0	1	3	1	2
sp|O09061|PSB1_MOUSE	O09061	PSB1_MOUSE	Psmb1	240	43.3	Mus musculus OX=10090	1:Experimental evidence at protein level	Proteasome subunit beta type-1	1	0.999	7	40	40	40	4	3	4	4	5	3	3	4	2	4	0	1	1	2	4	3	4	4	5	3	3	4	2	4	0	1	1	2	4	3	4	4	5	3	3
sp|O09111|NDUBB_MOUSE	O09111	NDUBB_MOUSE	Ndufb11	151	37.7	Mus musculus OX=10090	1:Experimental evidence at protein level	NADH dehydrogenase [ubiquinone] 1 beta subcomplex subunit 11, mitochondrial	1	0.999	4	33	33	33	1	2	2	1	6	4	3	2	5	3	1	1	1	1	1	2	2	1	6	4	3	2	5	3	1	1	1	1	1	2	2	1	6	4	3
sp|O09158|CP3AP_MOUSE	O09158	CP3AP_MOUSE	Cyp3a25	503	17.3	Mus musculus OX=10090	1:Experimental evidence at protein level	Cytochrome P450 3A25	1	0.999	5	16	16	16	0	0	0	0	3	3	2	2	3	3	0	0	0	0	0	0	0	0	3	3	2	2	3	3	0	0	0	0	0	0	0	0	3	3	2
sp|O09159|MA2B1_MOUSE	O09159	MA2B1_MOUSE	Man2b1	1013	7.7	Mus musculus OX=10090	1:Experimental evidence at protein level	Lysosomal alpha-mannosidase	1	0.999	6	16	16	16	1	1	1	0	4	2	2	0	3	2	0	0	0	0	1	1	1	0	4	2	2	0	3	2	0	0	0	0	1	1	1	0	4	2	2
sp|O09164|SODE_MOUSE	O09164	SODE_MOUSE	Sod3	251	10.8	Mus musculus OX=10090	1:Experimental evidence at protein level	Extracellular superoxide dismutase [Cu-Zn]	1	0.999	2	6	6	6	0	0	0	0	3	2	1	0	0	0	0	0	0	0	0	0	0	0	3	2	1	0	0	0	0	0	0	0	0	0	0	0	3	2	1
sp|O09167|RL21_MOUSE	O09167	RL21_MOUSE	Rpl21	160	34.4	Mus musculus OX=10090	1:Experimental evidence at protein level	60S ribosomal protein L21	1	0.999	8	47	47	47	6	4	5	4	6	4	5	2	3	2	1	1	2	2	6	4	5	4	6	4	5	2	3	2	1	1	2	2	6	4	5	4	6	4	5
sp|O09172|GSH0_MOUSE	O09172	GSH0_MOUSE	Gclm	274	36.5	Mus musculus OX=10090	1:Experimental evidence at protein level	Glutamate--cysteine ligase regulatory subunit	1	0.999	7	47	47	47	3	3	3	3	5	6	5	4	3	7	1	1	1	2	3	3	3	3	5	6	5	4	3	7	1	1	1	2	3	3	3	3	5	6	5
sp|O09173|HGD_MOUSE	O09173	HGD_MOUSE	Hgd	445	58	Mus musculus OX=10090	1:Experimental evidence at protein level	Homogentisate 1,2-dioxygenase	1	0.999	19	152	152	152	11	12	10	12	22	20	22	8	10	6	4	4	5	6	11	12	10	12	22	20	22	8	10	6	4	4	5	6	11	12	10	12	22	20	22
sp|O09174|AMACR_MOUSE	O09174	AMACR_MOUSE	Amacr	381	44.1	Mus musculus OX=10090	1:Experimental evidence at protein level	Alpha-methylacyl-CoA racemase	1	0.999	15	121	121	121	11	10	13	11	13	14	13	10	11	6	1	1	3	4	11	10	13	11	13	14	13	10	11	6	1	1	3	4	11	10	13	11	13	14	13
sp|O35114|SCRB2_MOUSE	O35114	SCRB2_MOUSE	Scarb2	478	11.3	Mus musculus OX=10090	1:Experimental evidence at protein level	Lysosome membrane protein 2	1	0.999	7	29	29	29	2	1	2	2	6	4	2	3	3	4	0	0	0	0	2	1	2	2	6	4	2	3	3	4	0	0	0	0	2	1	2	2	6	4	2
sp|O35129|PHB2_MOUSE	O35129	PHB2_MOUSE	Phb2	299	74.9	Mus musculus OX=10090	1:Experimental evidence at protein level	Prohibitin-2	1	0.999	22	250	250	250	21	20	18	20	18	21	23	18	18	17	14	14	13	15	21	20	18	20	18	21	23	18	18	17	14	14	13	15	21	20	18	20	18	21	23
sp|O35166|GOSR2_MOUSE	O35166	GOSR2_MOUSE	Gosr2	212	10.4	Mus musculus OX=10090	1:Experimental evidence at protein level	Golgi SNAP receptor complex member 2	1	0.999	2	11	11	11	2	2	1	1	2	1	2	0	0	0	0	0	0	0	2	2	1	1	2	1	2	0	0	0	0	0	0	0	2	2	1	1	2	1	2
sp|O35215|DOPD_MOUSE	O35215	DOPD_MOUSE	Ddt	118	95.8	Mus musculus OX=10090	1:Experimental evidence at protein level	D-dopachrome decarboxylase	1	0.999	9	66	66	66	4	5	3	3	8	5	6	7	7	7	2	4	3	2	4	5	3	3	8	5	6	7	7	7	2	4	3	2	4	5	3	3	8	5	6
sp|O35226|PSMD4_MOUSE	O35226	PSMD4_MOUSE	Psmd4	376	26.3	Mus musculus OX=10090	1:Experimental evidence at protein level	26S proteasome non-ATPase regulatory subunit 4	1	0.999	8	30	30	30	3	1	2	2	3	3	5	4	2	4	1	0	0	0	3	1	2	2	3	3	5	4	2	4	1	0	0	0	3	1	2	2	3	3	5
sp|O35250|EXOC7_MOUSE	O35250	EXOC7_MOUSE	Exoc7	697	4	Mus musculus OX=10090	1:Experimental evidence at protein level	Exocyst complex component 7	1	0.9986	3	3	3	3	0	0	0	0	0	2	0	0	1	0	0	0	0	0	0	0	0	0	0	2	0	0	1	0	0	0	0	0	0	0	0	0	0	2	0
sp|O35286|DHX15_MOUSE	O35286	DHX15_MOUSE	Dhx15	795	7	Mus musculus OX=10090	1:Experimental evidence at protein level	Pre-mRNA-splicing factor ATP-dependent RNA helicase DHX15	1	0.999	6	14	14	14	0	0	1	0	3	3	5	0	2	0	0	0	0	0	0	0	1	0	3	3	5	0	2	0	0	0	0	0	0	0	1	0	3	3	5
sp|O35309|NMI_MOUSE	O35309	NMI_MOUSE	Nmi	314	21.7	Mus musculus OX=10090	1:Experimental evidence at protein level	N-myc-interactor	1	0.999	3	6	6	6	0	0	0	0	2	2	2	0	0	0	0	0	0	0	0	0	0	0	2	2	2	0	0	0	0	0	0	0	0	0	0	0	2	2	2
sp|O35326|SRSF5_MOUSE	O35326	SRSF5_MOUSE	Srsf5	269	11.5	Mus musculus OX=10090	1:Experimental evidence at protein level	Serine/arginine-rich splicing factor 5	1	0.999	3	3	3	10	0	0	0	0	0	1	2	0	0	0	0	0	0	0	0	0	0	0	0	1	2	0	0	0	0	0	0	0	0	0	0	0	1	1	4
sp|O35344|IMA4_MOUSE	O35344	IMA4_MOUSE	Kpna3	521	12.1	Mus musculus OX=10090	1:Experimental evidence at protein level	Importin subunit alpha-4	1	0.999	5	19	15	19	1	1	1	1	3	5	3	0	2	2	0	0	0	0	1	1	1	1	2	3	2	0	2	2	0	0	0	0	1	1	1	1	3	5	3
sp|O35350|CAN1_MOUSE	O35350	CAN1_MOUSE	Capn1	713	5.6	Mus musculus OX=10090	1:Experimental evidence at protein level	Calpain-1 catalytic subunit	1	0.999	4	8	8	8	0	0	0	0	2	2	3	0	0	1	0	0	0	0	0	0	0	0	2	2	3	0	0	1	0	0	0	0	0	0	0	0	2	2	3
sp|O35382|EXOC4_MOUSE	O35382	EXOC4_MOUSE	Exoc4	975	5.8	Mus musculus OX=10090	1:Experimental evidence at protein level	Exocyst complex component 4	1	0.999	3	9	9	9	0	0	0	0	3	3	3	0	0	0	0	0	0	0	0	0	0	0	3	3	3	0	0	0	0	0	0	0	0	0	0	0	3	3	3
sp|O35386|PAHX_MOUSE	O35386	PAHX_MOUSE	Phyh	338	15.4	Mus musculus OX=10090	1:Experimental evidence at protein level	Phytanoyl-CoA dioxygenase, peroxisomal	1	0.999	5	20	20	20	1	1	1	1	3	4	1	4	2	2	0	0	0	0	1	1	1	1	3	4	1	4	2	2	0	0	0	0	1	1	1	1	3	4	1
sp|O35387|HAX1_MOUSE	O35387	HAX1_MOUSE	Hax1	280	11.1	Mus musculus OX=10090	1:Experimental evidence at protein level	HCLS1-associated protein X-1	1	0.999	2	5	5	5	0	0	0	0	2	1	2	0	0	0	0	0	0	0	0	0	0	0	2	1	2	0	0	0	0	0	0	0	0	0	0	0	2	1	2
sp|O35403|ST3A1_MOUSE	O35403	ST3A1_MOUSE	Sult3a1	293	41.6	Mus musculus OX=10090	2:Experimental evidence at transcript level	Amine sulfotransferase	1	0.999	12	29	29	29	1	0	0	5	0	7	6	9	0	1	0	0	0	0	1	0	0	5	0	7	6	9	0	1	0	0	0	0	1	0	0	5	0	7	6
sp|O35435|PYRD_MOUSE	O35435	PYRD_MOUSE	Dhodh	395	6.8	Mus musculus OX=10090	1:Experimental evidence at protein level	Dihydroorotate dehydrogenase (quinone), mitochondrial	1	0.999	3	4	4	4	0	0	0	1	2	0	1	0	0	0	0	0	0	0	0	0	0	1	2	0	1	0	0	0	0	0	0	0	0	0	0	1	2	0	1
sp|O35459|ECH1_MOUSE	O35459	ECH1_MOUSE	Ech1	327	43.7	Mus musculus OX=10090	1:Experimental evidence at protein level	Delta(3,5)-Delta(2,4)-dienoyl-CoA isomerase, mitochondrial	1	0.999	14	95	95	95	7	7	8	8	12	13	12	10	7	7	1	1	1	1	7	7	8	8	12	13	12	10	7	7	1	1	1	1	7	7	8	8	12	13	12
sp|O35465|FKBP8_MOUSE	O35465	FKBP8_MOUSE	Fkbp8	402	8.5	Mus musculus OX=10090	1:Experimental evidence at protein level	Peptidyl-prolyl cis-trans isomerase FKBP8	1	0.999	3	14	14	14	1	1	0	1	3	2	3	1	1	1	0	0	0	0	1	1	0	1	3	2	3	1	1	1	0	0	0	0	1	1	0	1	3	2	3
sp|O35488|S27A2_MOUSE	O35488	S27A2_MOUSE	Slc27a2	620	57.6	Mus musculus OX=10090	1:Experimental evidence at protein level	Very long-chain acyl-CoA synthetase	1	0.999	36	285	285	285	18	23	23	30	32	33	40	19	21	22	6	7	7	4	18	23	23	30	32	33	40	19	21	22	6	7	7	4	18	23	23	30	32	33	40
sp|O35490|BHMT1_MOUSE	O35490	BHMT1_MOUSE	Bhmt	407	75.9	Mus musculus OX=10090	1:Experimental evidence at protein level	Betaine--homocysteine S-methyltransferase 1	1	0.999	34	626	495	626	51	50	47	49	61	66	63	40	37	43	30	30	28	31	42	40	37	38	50	56	51	28	26	33	24	24	22	24	51	50	47	49	61	66	63
sp|O35551|RABE1_MOUSE	O35551	RABE1_MOUSE	Rabep1	862	4.6	Mus musculus OX=10090	1:Experimental evidence at protein level	Rab GTPase-binding effector protein 1	1	0.9987	2	4	4	4	0	0	0	0	1	1	2	0	0	0	0	0	0	0	0	0	0	0	1	1	2	0	0	0	0	0	0	0	0	0	0	0	1	1	2
sp|O35593|PSDE_MOUSE	O35593	PSDE_MOUSE	Psmd14	310	11.9	Mus musculus OX=10090	1:Experimental evidence at protein level	26S proteasome non-ATPase regulatory subunit 14	1	0.999	3	13	13	13	1	1	1	1	1	3	2	1	1	1	0	0	0	0	1	1	1	1	1	3	2	1	1	1	0	0	0	0	1	1	1	1	1	3	2
sp|O35609|SCAM3_MOUSE	O35609	SCAM3_MOUSE	Scamp3	349	11.2	Mus musculus OX=10090	1:Experimental evidence at protein level	Secretory carrier-associated membrane protein 3	1	0.999	3	13	13	13	0	0	0	0	3	3	2	2	2	1	0	0	0	0	0	0	0	0	3	3	2	2	2	1	0	0	0	0	0	0	0	0	3	3	2
sp|O35643|AP1B1_MOUSE	O35643	AP1B1_MOUSE	Ap1b1	943	22.2	Mus musculus OX=10090	1:Experimental evidence at protein level	AP-1 complex subunit beta-1	1	0.999	17	35	35	76	3	2	2	2	3	3	4	4	5	5	0	0	1	1	3	2	2	2	3	3	4	4	5	5	0	0	1	1	6	5	3	5	9	7	8
sp|O35658|C1QBP_MOUSE	O35658	C1QBP_MOUSE	C1qbp	278	20.5	Mus musculus OX=10090	1:Experimental evidence at protein level	Complement component 1 Q subcomponent-binding protein, mitochondrial	1	0.999	3	21	21	21	1	2	2	1	3	3	3	1	3	2	0	0	0	0	1	2	2	1	3	3	3	1	3	2	0	0	0	0	1	2	2	1	3	3	3
sp|O35660|GSTM6_MOUSE	O35660	GSTM6_MOUSE	Gstm6	218	37.6	Mus musculus OX=10090	1:Experimental evidence at protein level	Glutathione S-transferase Mu 6	1	0.999	10	21	21	56	1	1	1	3	2	4	4	2	1	2	0	0	0	0	1	1	1	3	2	4	4	2	1	2	0	0	0	0	5	4	2	8	5	8	8
sp|O35678|MGLL_MOUSE	O35678	MGLL_MOUSE	Mgll	303	10.9	Mus musculus OX=10090	1:Experimental evidence at protein level	Monoglyceride lipase	1	0.999	3	14	14	14	1	1	1	1	1	0	1	3	2	3	0	0	0	0	1	1	1	1	1	0	1	3	2	3	0	0	0	0	1	1	1	1	1	0	1
sp|O35683|NDUA1_MOUSE	O35683	NDUA1_MOUSE	Ndufa1	70	24.3	Mus musculus OX=10090	1:Experimental evidence at protein level	NADH dehydrogenase [ubiquinone] 1 alpha subcomplex subunit 1	1	0.999	2	12	12	12	2	1	1	2	2	3	1	0	0	0	0	0	0	0	2	1	1	2	2	3	1	0	0	0	0	0	0	0	2	1	1	2	2	3	1
sp|O35685|NUDC_MOUSE	O35685	NUDC_MOUSE	Nudc	332	21.7	Mus musculus OX=10090	1:Experimental evidence at protein level	Nuclear migration protein nudC	1	0.999	6	29	29	29	2	1	1	3	5	5	6	2	1	3	0	0	0	0	2	1	1	3	5	5	6	2	1	3	0	0	0	0	2	1	1	3	5	5	6
sp|O35691|PININ_MOUSE	O35691	PININ_MOUSE	Pnn	725	3.2	Mus musculus OX=10090	1:Experimental evidence at protein level	Pinin	1	0.9989	3	3	3	3	0	0	0	0	1	0	1	0	1	0	0	0	0	0	0	0	0	0	1	0	1	0	1	0	0	0	0	0	0	0	0	0	1	0	1
sp|O35737|HNRH1_MOUSE	O35737	HNRH1_MOUSE	Hnrnph1	449	30.1	Mus musculus OX=10090	1:Experimental evidence at protein level	Heterogeneous nuclear ribonucleoprotein H	1	0.999	9	13	13	63	1	1	0	0	3	3	2	0	1	1	0	0	1	0	1	1	0	0	3	3	2	0	1	1	0	0	1	0	4	4	3	4	8	7	6
sp|O35841|API5_MOUSE	O35841	API5_MOUSE	Api5	504	19.8	Mus musculus OX=10090	1:Experimental evidence at protein level	Apoptosis inhibitor 5	1	0.999	7	18	18	18	1	1	0	0	5	4	4	1	1	1	0	0	0	0	1	1	0	0	5	4	4	1	1	1	0	0	0	0	1	1	0	0	5	4	4
sp|O35857|TIM44_MOUSE	O35857	TIM44_MOUSE	Timm44	452	30.3	Mus musculus OX=10090	1:Experimental evidence at protein level	Mitochondrial import inner membrane translocase subunit TIM44	1	0.999	16	67	67	67	6	6	5	8	8	7	5	5	7	10	0	0	0	0	6	6	5	8	8	7	5	5	7	10	0	0	0	0	6	6	5	8	8	7	5
sp|O35864|CSN5_MOUSE	O35864	CSN5_MOUSE	Cops5	334	10.8	Mus musculus OX=10090	1:Experimental evidence at protein level	COP9 signalosome complex subunit 5	1	0.999	3	15	15	15	1	1	1	1	1	4	1	1	2	2	0	0	0	0	1	1	1	1	1	4	1	1	2	2	0	0	0	0	1	1	1	1	1	4	1
sp|O35887|CALU_MOUSE	O35887	CALU_MOUSE	Calu	315	30.5	Mus musculus OX=10090	1:Experimental evidence at protein level	Calumenin	1	0.999	9	40	40	40	3	3	4	2	6	6	7	2	4	3	0	0	0	0	3	3	4	2	6	6	7	2	4	3	0	0	0	0	3	3	4	2	6	6	7
sp|O35943|FRDA_MOUSE	O35943	FRDA_MOUSE	Fxn	207	19.3	Mus musculus OX=10090	1:Experimental evidence at protein level	Frataxin, mitochondrial	1	0.999	3	9	9	9	1	0	0	0	1	1	1	1	0	3	0	0	1	0	1	0	0	0	1	1	1	1	0	3	0	0	1	0	1	0	0	0	1	1	1
sp|O35955|PSB10_MOUSE	O35955	PSB10_MOUSE	Psmb10	273	19.4	Mus musculus OX=10090	1:Experimental evidence at protein level	Proteasome subunit beta type-10	1	0.999	4	8	8	8	0	0	0	1	1	1	2	1	1	1	0	0	0	0	0	0	0	1	1	1	2	1	1	1	0	0	0	0	0	0	0	1	1	1	2
sp|O35969|GAMT_MOUSE	O35969	GAMT_MOUSE	Gamt	236	41.9	Mus musculus OX=10090	1:Experimental evidence at protein level	Guanidinoacetate N-methyltransferase	1	0.999	6	30	30	30	1	1	2	1	3	2	2	4	6	6	0	0	1	1	1	1	2	1	3	2	2	4	6	6	0	0	1	1	1	1	2	1	3	2	2
sp|O54734|OST48_MOUSE	O54734	OST48_MOUSE	Ddost	441	41.7	Mus musculus OX=10090	1:Experimental evidence at protein level	Dolichyl-diphosphooligosaccharide--protein glycosyltransferase 48 kDa subunit	1	0.999	14	124	124	124	10	11	10	11	13	9	13	6	7	7	9	4	6	8	10	11	10	11	13	9	13	6	7	7	9	4	6	8	10	11	10	11	13	9	13
sp|O54754|AOXA_MOUSE	O54754	AOXA_MOUSE	Aox1	1333	3.8	Mus musculus OX=10090	1:Experimental evidence at protein level	Aldehyde oxidase 1	1	0.9988	2	3	3	3	0	0	0	0	0	1	1	1	0	0	0	0	0	0	0	0	0	0	0	1	1	1	0	0	0	0	0	0	0	0	0	0	0	1	1
sp|O54909|RDH16_MOUSE	O54909	RDH16_MOUSE	Rdh16	317	33.8	Mus musculus OX=10090	1:Experimental evidence at protein level	Retinol dehydrogenase 16	1	0.999	13	37	37	119	2	2	2	3	6	6	5	3	2	2	1	1	1	1	2	2	2	3	6	6	5	3	2	2	1	1	1	1	6	8	7	9	13	13	12
sp|O54950|AAKG1_MOUSE	O54950	AAKG1_MOUSE	Prkag1	330	13.9	Mus musculus OX=10090	1:Experimental evidence at protein level	5'-AMP-activated protein kinase subunit gamma-1	1	0.999	3	4	4	4	0	0	0	0	0	3	1	0	0	0	0	0	0	0	0	0	0	0	0	3	1	0	0	0	0	0	0	0	0	0	0	0	0	3	1
sp|O54988|SLK_MOUSE	O54988	SLK_MOUSE	Slk	1233	6.3	Mus musculus OX=10090	1:Experimental evidence at protein level	STE20-like serine/threonine-protein kinase	1	0.999	2	5	5	5	0	0	0	0	2	1	2	0	0	0	0	0	0	0	0	0	0	0	2	1	2	0	0	0	0	0	0	0	0	0	0	0	2	1	2
sp|O55013|TPPC3_MOUSE	O55013	TPPC3_MOUSE	Trappc3	180	10.6	Mus musculus OX=10090	1:Experimental evidence at protein level	Trafficking protein particle complex subunit 3	1	0.999	2	3	3	3	0	0	0	0	1	0	0	1	0	1	0	0	0	0	0	0	0	0	1	0	0	1	0	1	0	0	0	0	0	0	0	0	1	0	0
sp|O55022|PGRC1_MOUSE	O55022	PGRC1_MOUSE	Pgrmc1	195	64.1	Mus musculus OX=10090	1:Experimental evidence at protein level	Membrane-associated progesterone receptor component 1	1	0.999	15	143	139	143	9	9	9	12	20	15	16	7	8	9	6	8	7	8	9	9	9	11	19	14	15	7	8	9	6	8	7	8	9	9	9	12	20	15	16
sp|O55029|COPB2_MOUSE	O55029	COPB2_MOUSE	Copb2	905	27.2	Mus musculus OX=10090	1:Experimental evidence at protein level	Coatomer subunit beta'	1	0.999	17	88	88	88	8	6	8	8	10	14	10	5	6	7	1	1	2	2	8	6	8	8	10	14	10	5	6	7	1	1	2	2	8	6	8	8	10	14	10
sp|O55060|TPMT_MOUSE	O55060	TPMT_MOUSE	Tpmt	240	19.2	Mus musculus OX=10090	1:Experimental evidence at protein level	Thiopurine S-methyltransferase	1	0.999	3	9	9	9	0	1	2	1	2	2	1	0	0	0	0	0	0	0	0	1	2	1	2	2	1	0	0	0	0	0	0	0	0	1	2	1	2	2	1
sp|O55111|DSG2_MOUSE	O55111	DSG2_MOUSE	Dsg2	1122	16.5	Mus musculus OX=10090	1:Experimental evidence at protein level	Desmoglein-2	1	0.999	13	46	46	46	1	2	3	1	9	7	10	2	7	4	0	0	0	0	1	2	3	1	9	7	10	2	7	4	0	0	0	0	1	2	3	1	9	7	10
sp|O55125|NIPS1_MOUSE	O55125	NIPS1_MOUSE	Nipsnap1	284	40.5	Mus musculus OX=10090	1:Experimental evidence at protein level	Protein NipSnap homolog 1	1	0.999	15	111	111	111	8	9	12	10	13	13	12	7	7	7	5	2	3	3	8	9	12	10	13	13	12	7	7	7	5	2	3	3	8	9	12	10	13	13	12
sp|O55135|IF6_MOUSE	O55135	IF6_MOUSE	Eif6	245	11.4	Mus musculus OX=10090	1:Experimental evidence at protein level	Eukaryotic translation initiation factor 6	1	0.999	2	10	10	10	1	0	1	0	1	2	2	1	1	1	0	0	0	0	1	0	1	0	1	2	2	1	1	1	0	0	0	0	1	0	1	0	1	2	2
sp|O55142|RL35A_MOUSE	O55142	RL35A_MOUSE	Rpl35a	110	50.9	Mus musculus OX=10090	1:Experimental evidence at protein level	60S ribosomal protein L35a	1	0.999	8	60	60	60	5	5	4	5	8	7	7	5	1	4	1	3	2	3	5	5	4	5	8	7	7	5	1	4	1	3	2	3	5	5	4	5	8	7	7
sp|O55234|PSB5_MOUSE	O55234	PSB5_MOUSE	Psmb5	264	31.1	Mus musculus OX=10090	1:Experimental evidence at protein level	Proteasome subunit beta type-5	1	0.999	8	41	41	41	3	3	3	5	5	5	4	6	4	3	0	0	0	0	3	3	3	5	5	5	4	6	4	3	0	0	0	0	3	3	3	5	5	5	4
sp|O55242|SGMR1_MOUSE	O55242	SGMR1_MOUSE	Sigmar1	223	9.4	Mus musculus OX=10090	1:Experimental evidence at protein level	Sigma non-opioid intracellular receptor 1	1	0.999	2	16	16	16	0	2	1	1	2	2	2	2	2	2	0	0	0	0	0	2	1	1	2	2	2	2	2	2	0	0	0	0	0	2	1	1	2	2	2
sp|O70133|DHX9_MOUSE	O70133	DHX9_MOUSE	Dhx9	1380	17.3	Mus musculus OX=10090	1:Experimental evidence at protein level	ATP-dependent RNA helicase A	1	0.999	17	47	47	47	5	2	4	3	11	9	7	1	2	1	0	1	0	1	5	2	4	3	11	9	7	1	2	1	0	1	0	1	5	2	4	3	11	9	7
sp|O70152|DPM1_MOUSE	O70152	DPM1_MOUSE	Dpm1	260	10	Mus musculus OX=10090	1:Experimental evidence at protein level	Dolichol-phosphate mannosyltransferase subunit 1	1	0.999	2	6	6	6	0	0	0	0	2	2	2	0	0	0	0	0	0	0	0	0	0	0	2	2	2	0	0	0	0	0	0	0	0	0	0	0	2	2	2
sp|O70194|EIF3D_MOUSE	O70194	EIF3D_MOUSE	Eif3d	548	24.8	Mus musculus OX=10090	1:Experimental evidence at protein level	Eukaryotic translation initiation factor 3 subunit D	1	0.999	10	37	37	37	2	3	5	3	6	6	7	3	1	1	0	0	0	0	2	3	5	3	6	6	7	3	1	1	0	0	0	0	2	3	5	3	6	6	7
sp|O70251|EF1B_MOUSE	O70251	EF1B_MOUSE	Eef1b	225	35.6	Mus musculus OX=10090	1:Experimental evidence at protein level	Elongation factor 1-beta	1	0.999	6	55	55	55	4	3	3	3	5	5	5	6	6	7	2	2	2	2	4	3	3	3	5	5	5	6	6	7	2	2	2	2	4	3	3	3	5	5	5
sp|O70252|HMOX2_MOUSE	O70252	HMOX2_MOUSE	Hmox2	315	14.6	Mus musculus OX=10090	1:Experimental evidence at protein level	Heme oxygenase 2	1	0.999	3	6	6	6	0	0	0	0	2	3	1	0	0	0	0	0	0	0	0	0	0	0	2	3	1	0	0	0	0	0	0	0	0	0	0	0	2	3	1
sp|O70305|ATX2_MOUSE	O70305	ATX2_MOUSE	Atxn2	1285	4.5	Mus musculus OX=10090	1:Experimental evidence at protein level	Ataxin-2	1	0.999	5	15	13	15	0	0	0	0	4	6	4	0	0	1	0	0	0	0	0	0	0	0	3	5	4	0	0	1	0	0	0	0	0	0	0	0	4	6	4
sp|O70310|NMT1_MOUSE	O70310	NMT1_MOUSE	Nmt1	496	14.1	Mus musculus OX=10090	1:Experimental evidence at protein level	Glycylpeptide N-tetradecanoyltransferase 1	1	0.999	5	18	18	18	1	0	1	2	4	4	4	1	1	0	0	0	0	0	1	0	1	2	4	4	4	1	1	0	0	0	0	0	1	0	1	2	4	4	4
sp|O70318|E41L2_MOUSE	O70318	E41L2_MOUSE	Epb41l2	988	9	Mus musculus OX=10090	1:Experimental evidence at protein level	Band 4.1-like protein 2	1	0.999	6	16	16	16	1	0	0	0	5	6	4	0	0	0	0	0	0	0	1	0	0	0	5	6	4	0	0	0	0	0	0	0	1	0	0	0	5	6	4
sp|O70325|GPX4_MOUSE	O70325	GPX4_MOUSE	Gpx4	197	28.4	Mus musculus OX=10090	1:Experimental evidence at protein level	Phospholipid hydroperoxide glutathione peroxidase	1	0.999	5	23	23	23	1	3	2	2	6	3	3	1	0	1	0	0	0	1	1	3	2	2	6	3	3	1	0	1	0	0	0	1	1	3	2	2	6	3	3
sp|O70362|PHLD_MOUSE	O70362	PHLD_MOUSE	Gpld1	837	5.1	Mus musculus OX=10090	1:Experimental evidence at protein level	Phosphatidylinositol-glycan-specific phospholipase D	1	0.999	4	6	6	6	0	1	0	0	2	1	1	0	0	1	0	0	0	0	0	1	0	0	2	1	1	0	0	1	0	0	0	0	0	1	0	0	2	1	1
sp|O70378|EMC8_MOUSE	O70378	EMC8_MOUSE	Emc8	207	17.9	Mus musculus OX=10090	1:Experimental evidence at protein level	ER membrane protein complex subunit 8	1	0.999	2	6	6	6	0	1	1	1	1	0	2	0	0	0	0	0	0	0	0	1	1	1	1	0	2	0	0	0	0	0	0	0	0	1	1	1	1	0	2
sp|O70400|PDLI1_MOUSE	O70400	PDLI1_MOUSE	Pdlim1	327	39.4	Mus musculus OX=10090	1:Experimental evidence at protein level	PDZ and LIM domain protein 1	1	0.999	9	40	40	40	2	1	1	1	10	9	9	0	5	2	0	0	0	0	2	1	1	1	10	9	9	0	5	2	0	0	0	0	2	1	1	1	10	9	9
sp|O70404|VAMP8_MOUSE	O70404	VAMP8_MOUSE	Vamp8	101	50.5	Mus musculus OX=10090	1:Experimental evidence at protein level	Vesicle-associated membrane protein 8	1	0.999	5	18	18	18	1	1	1	1	2	4	3	1	2	2	0	0	0	0	1	1	1	1	2	4	3	1	2	2	0	0	0	0	1	1	1	1	2	4	3
sp|O70435|PSA3_MOUSE	O70435	PSA3_MOUSE	Psma3	255	44.3	Mus musculus OX=10090	1:Experimental evidence at protein level	Proteasome subunit alpha type-3	1	0.999	13	81	81	81	3	6	3	6	12	10	13	8	4	7	2	3	2	2	3	6	3	6	12	10	13	8	4	7	2	3	2	2	3	6	3	6	12	10	13
sp|O70439|STX7_MOUSE	O70439	STX7_MOUSE	Stx7	261	19.5	Mus musculus OX=10090	1:Experimental evidence at protein level	Syntaxin-7	1	0.999	4	6	6	6	0	0	0	0	4	0	2	0	0	0	0	0	0	0	0	0	0	0	4	0	2	0	0	0	0	0	0	0	0	0	0	0	4	0	2
sp|O70475|UGDH_MOUSE	O70475	UGDH_MOUSE	Ugdh	493	41.4	Mus musculus OX=10090	1:Experimental evidence at protein level	UDP-glucose 6-dehydrogenase	1	0.999	20	122	122	122	7	7	9	10	10	17	13	13	10	11	5	2	2	6	7	7	9	10	10	17	13	13	10	11	5	2	2	6	7	7	9	10	10	17	13
sp|O70492|SNX3_MOUSE	O70492	SNX3_MOUSE	Snx3	162	46.3	Mus musculus OX=10090	1:Experimental evidence at protein level	Sorting nexin-3	1	0.999	9	45	43	45	5	5	4	5	5	5	7	3	3	2	1	0	0	0	5	5	4	5	4	5	6	3	3	2	1	0	0	0	5	5	4	5	5	5	7
sp|O70493|SNX12_MOUSE	O70493	SNX12_MOUSE	Snx12	165	29.7	Mus musculus OX=10090	1:Experimental evidence at protein level	Sorting nexin-12	1	0.999	6	8	8	10	0	0	1	1	2	0	1	1	0	2	0	0	0	0	0	0	1	1	2	0	1	1	0	2	0	0	0	0	0	0	1	1	3	0	2
sp|O70503|DHB12_MOUSE	O70503	DHB12_MOUSE	Hsd17b12	312	20.8	Mus musculus OX=10090	1:Experimental evidence at protein level	Very-long-chain 3-oxoacyl-CoA reductase	1	0.999	6	53	53	53	5	5	5	5	6	6	6	3	3	5	2	0	0	2	5	5	5	5	6	6	6	3	3	5	2	0	0	2	5	5	5	5	6	6	6
sp|O70570|PIGR_MOUSE	O70570	PIGR_MOUSE	Pigr	771	17	Mus musculus OX=10090	1:Experimental evidence at protein level	Polymeric immunoglobulin receptor	1	0.999	11	60	60	60	4	6	5	5	8	7	9	1	9	6	0	0	0	0	4	6	5	5	8	7	9	1	9	6	0	0	0	0	4	6	5	5	8	7	9
sp|O88342|WDR1_MOUSE	O88342	WDR1_MOUSE	Wdr1	606	28.2	Mus musculus OX=10090	1:Experimental evidence at protein level	WD repeat-containing protein 1	1	0.999	13	57	57	57	2	3	4	5	9	9	6	4	5	7	0	0	1	2	2	3	4	5	9	9	6	4	5	7	0	0	1	2	2	3	4	5	9	9	6
sp|O88384|VTI1B_MOUSE	O88384	VTI1B_MOUSE	Vti1b	232	9.5	Mus musculus OX=10090	1:Experimental evidence at protein level	Vesicle transport through interaction with t-SNAREs homolog 1B	1	0.999	2	5	5	5	0	0	0	0	2	2	1	0	0	0	0	0	0	0	0	0	0	0	2	2	1	0	0	0	0	0	0	0	0	0	0	0	2	2	1
sp|O88428|PAPS2_MOUSE	O88428	PAPS2_MOUSE	Papss2	621	43	Mus musculus OX=10090	1:Experimental evidence at protein level	Bifunctional 3'-phosphoadenosine 5'-phosphosulfate synthase 2	1	0.999	26	148	148	148	13	13	10	11	22	22	18	13	7	9	3	2	3	2	13	13	10	11	22	22	18	13	7	9	3	2	3	2	13	13	10	11	22	22	18
sp|O88441|MTX2_MOUSE	O88441	MTX2_MOUSE	Mtx2	263	23.6	Mus musculus OX=10090	1:Experimental evidence at protein level	Metaxin-2	1	0.999	4	12	12	12	0	0	0	0	4	1	5	0	2	0	0	0	0	0	0	0	0	0	4	1	5	0	2	0	0	0	0	0	0	0	0	0	4	1	5
sp|O88451|RDH7_MOUSE	O88451	RDH7_MOUSE	Rdh7	316	54.4	Mus musculus OX=10090	1:Experimental evidence at protein level	Retinol dehydrogenase 7	1	0.999	18	213	117	213	14	14	14	16	19	21	20	16	12	16	13	14	13	11	9	7	8	9	11	13	12	8	5	8	7	8	7	5	14	14	14	16	19	21	20
sp|O88455|DHCR7_MOUSE	O88455	DHCR7_MOUSE	Dhcr7	471	6.4	Mus musculus OX=10090	1:Experimental evidence at protein level	7-dehydrocholesterol reductase	1	0.999	2	14	14	14	2	2	1	2	1	1	1	1	1	1	0	1	0	0	2	2	1	2	1	1	1	1	1	1	0	1	0	0	2	2	1	2	1	1	1
sp|O88456|CPNS1_MOUSE	O88456	CPNS1_MOUSE	Capns1	269	17.5	Mus musculus OX=10090	1:Experimental evidence at protein level	Calpain small subunit 1	1	0.999	2	4	4	4	0	2	1	0	0	1	0	0	0	0	0	0	0	0	0	2	1	0	0	1	0	0	0	0	0	0	0	0	0	2	1	0	0	1	0
sp|O88487|DC1I2_MOUSE	O88487	DC1I2_MOUSE	Dync1i2	612	15.4	Mus musculus OX=10090	1:Experimental evidence at protein level	Cytoplasmic dynein 1 intermediate chain 2	1	0.999	7	32	32	32	2	1	3	1	4	8	3	3	3	4	0	0	0	0	2	1	3	1	4	8	3	3	3	4	0	0	0	0	2	1	3	1	4	8	3
sp|O88531|PPT1_MOUSE	O88531	PPT1_MOUSE	Ppt1	306	7.8	Mus musculus OX=10090	1:Experimental evidence at protein level	Palmitoyl-protein thioesterase 1	1	0.999	2	3	3	3	0	0	0	0	2	0	1	0	0	0	0	0	0	0	0	0	0	0	2	0	1	0	0	0	0	0	0	0	0	0	0	0	2	0	1
sp|O88533|DDC_MOUSE	O88533	DDC_MOUSE	Ddc	480	11.5	Mus musculus OX=10090	1:Experimental evidence at protein level	Aromatic-L-amino-acid decarboxylase	1	0.999	3	7	7	7	0	0	0	0	3	1	1	0	1	1	0	0	0	0	0	0	0	0	3	1	1	0	1	1	0	0	0	0	0	0	0	0	3	1	1
sp|O88543|CSN3_MOUSE	O88543	CSN3_MOUSE	Cops3	423	14.4	Mus musculus OX=10090	1:Experimental evidence at protein level	COP9 signalosome complex subunit 3	1	0.999	3	14	14	14	1	0	1	1	3	2	3	2	0	1	0	0	0	0	1	0	1	1	3	2	3	2	0	1	0	0	0	0	1	0	1	1	3	2	3
sp|O88544|CSN4_MOUSE	O88544	CSN4_MOUSE	Cops4	406	15.5	Mus musculus OX=10090	1:Experimental evidence at protein level	COP9 signalosome complex subunit 4	1	0.999	5	25	25	25	2	3	3	3	2	2	5	2	1	2	0	0	0	0	2	3	3	3	2	2	5	2	1	2	0	0	0	0	2	3	3	3	2	2	5
sp|O88569|ROA2_MOUSE	O88569	ROA2_MOUSE	Hnrnpa2b1	353	55.8	Mus musculus OX=10090	1:Experimental evidence at protein level	Heterogeneous nuclear ribonucleoproteins A2/B1	1	0.999	20	237	227	237	17	18	17	18	24	24	24	19	15	17	11	10	11	12	16	17	16	17	23	23	24	18	14	16	10	10	11	12	17	18	17	18	24	24	24
sp|O88587|COMT_MOUSE	O88587	COMT_MOUSE	Comt	265	46	Mus musculus OX=10090	1:Experimental evidence at protein level	Catechol O-methyltransferase	1	0.999	10	85	85	85	4	7	7	6	10	10	8	10	6	8	1	3	3	2	4	7	7	6	10	10	8	10	6	8	1	3	3	2	4	7	7	6	10	10	8
sp|O88685|PRS6A_MOUSE	O88685	PRS6A_MOUSE	Psmc3	442	28.3	Mus musculus OX=10090	1:Experimental evidence at protein level	26S proteasome regulatory subunit 6A	1	0.999	9	40	40	40	1	2	0	0	7	7	8	4	5	6	0	0	0	0	1	2	0	0	7	7	8	4	5	6	0	0	0	0	1	2	0	0	7	7	8
sp|O88696|CLPP_MOUSE	O88696	CLPP_MOUSE	Clpp	272	30.5	Mus musculus OX=10090	1:Experimental evidence at protein level	ATP-dependent Clp protease proteolytic subunit, mitochondrial	1	0.999	7	35	35	35	3	2	2	1	8	8	6	0	2	3	0	0	0	0	3	2	2	1	8	8	6	0	2	3	0	0	0	0	3	2	2	1	8	8	6
sp|O88735|MAP7_MOUSE	O88735	MAP7_MOUSE	Map7	730	5.9	Mus musculus OX=10090	1:Experimental evidence at protein level	Ensconsin	1	0.999	4	9	9	9	1	0	0	1	3	2	2	0	0	0	0	0	0	0	1	0	0	1	3	2	2	0	0	0	0	0	0	0	1	0	0	1	3	2	2
sp|O88736|DHB7_MOUSE	O88736	DHB7_MOUSE	Hsd17b7	334	18	Mus musculus OX=10090	1:Experimental evidence at protein level	3-keto-steroid reductase/17-beta-hydroxysteroid dehydrogenase 7	1	0.999	5	17	17	17	1	1	1	3	3	4	4	0	0	0	0	0	0	0	1	1	1	3	3	4	4	0	0	0	0	0	0	0	1	1	1	3	3	4	4
sp|O88746|TOM1_MOUSE	O88746	TOM1_MOUSE	Tom1	492	6.9	Mus musculus OX=10090	1:Experimental evidence at protein level	Target of Myb protein 1	1	0.999	3	7	7	7	0	0	0	1	2	2	2	0	0	0	0	0	0	0	0	0	0	1	2	2	2	0	0	0	0	0	0	0	0	0	0	1	2	2	2
sp|O88844|IDHC_MOUSE	O88844	IDHC_MOUSE	Idh1	414	63.5	Mus musculus OX=10090	1:Experimental evidence at protein level	Isocitrate dehydrogenase [NADP] cytoplasmic	1	0.999	28	289	275	289	20	20	16	21	33	34	32	24	25	23	11	8	11	11	19	19	15	20	32	33	31	23	24	22	10	7	10	10	20	20	16	21	33	34	32
sp|O88851|RBBP9_MOUSE	O88851	RBBP9_MOUSE	Rbbp9	186	16.7	Mus musculus OX=10090	1:Experimental evidence at protein level	Putative hydrolase RBBP9	1	0.999	2	8	8	8	1	1	1	1	2	1	1	0	0	0	0	0	0	0	1	1	1	1	2	1	1	0	0	0	0	0	0	0	1	1	1	1	2	1	1
sp|O88908|SOAT2_MOUSE	O88908	SOAT2_MOUSE	Soat2	525	7.8	Mus musculus OX=10090	1:Experimental evidence at protein level	Sterol O-acyltransferase 2	1	0.999	4	24	24	24	3	2	1	1	2	4	2	3	3	3	0	0	0	0	3	2	1	1	2	4	2	3	3	3	0	0	0	0	3	2	1	1	2	4	2
sp|O88962|CP8B1_MOUSE	O88962	CP8B1_MOUSE	Cyp8b1	500	5.8	Mus musculus OX=10090	1:Experimental evidence at protein level	7-alpha-hydroxycholest-4-en-3-one 12-alpha-hydroxylase	1	0.999	3	7	7	7	0	0	0	0	3	2	1	0	0	1	0	0	0	0	0	0	0	0	3	2	1	0	0	1	0	0	0	0	0	0	0	0	3	2	1
sp|O88986|KBL_MOUSE	O88986	KBL_MOUSE	Gcat	416	20.9	Mus musculus OX=10090	1:Experimental evidence at protein level	2-amino-3-ketobutyrate coenzyme A ligase, mitochondrial	1	0.999	7	32	32	32	4	2	2	2	7	4	6	1	2	2	0	0	0	0	4	2	2	2	7	4	6	1	2	2	0	0	0	0	4	2	2	2	7	4	6
sp|O89023|TPP1_MOUSE	O89023	TPP1_MOUSE	Tpp1	562	10	Mus musculus OX=10090	1:Experimental evidence at protein level	Tripeptidyl-peptidase 1	1	0.999	4	42	42	42	4	4	3	4	5	4	4	3	3	4	1	1	1	1	4	4	3	4	5	4	4	3	3	4	1	1	1	1	4	4	3	4	5	4	4
sp|O89053|COR1A_MOUSE	O89053	COR1A_MOUSE	Coro1a	461	6.9	Mus musculus OX=10090	1:Experimental evidence at protein level	Coronin-1A	1	0.999	3	9	9	9	2	2	0	0	2	1	1	0	0	1	0	0	0	0	2	2	0	0	2	1	1	0	0	1	0	0	0	0	2	2	0	0	2	1	1
sp|O89079|COPE_MOUSE	O89079	COPE_MOUSE	Cope	308	19.5	Mus musculus OX=10090	1:Experimental evidence at protein level	Coatomer subunit epsilon	1	0.999	7	22	22	22	1	2	2	4	2	2	2	1	4	2	0	0	0	0	1	2	2	4	2	2	2	1	4	2	0	0	0	0	1	2	2	4	2	2	2
sp|P00329|ADH1_MOUSE	P00329	ADH1_MOUSE	Adh1	375	51.7	Mus musculus OX=10090	1:Experimental evidence at protein level	Alcohol dehydrogenase 1	1	0.999	23	317	317	317	23	21	24	27	34	33	31	23	17	20	16	15	15	18	23	21	24	27	34	33	31	23	17	20	16	15	15	18	23	21	24	27	34	33	31
sp|P00375|DYR_MOUSE	P00375	DYR_MOUSE	Dhfr	187	18.2	Mus musculus OX=10090	1:Experimental evidence at protein level	Dihydrofolate reductase	1	0.999	4	19	19	19	2	1	0	0	4	5	5	0	1	1	0	0	0	0	2	1	0	0	4	5	5	0	1	1	0	0	0	0	2	1	0	0	4	5	5
sp|P00405|COX2_MOUSE	P00405	COX2_MOUSE	Mtco2	227	32.2	Mus musculus OX=10090	1:Experimental evidence at protein level	Cytochrome c oxidase subunit 2	1	0.999	6	67	67	67	4	5	4	4	7	5	5	6	8	7	3	3	3	3	4	5	4	4	7	5	5	6	8	7	3	3	3	3	4	5	4	4	7	5	5
sp|P00416|COX3_MOUSE	P00416	COX3_MOUSE	mt-Co3	261	5.4	Mus musculus OX=10090	1:Experimental evidence at protein level	Cytochrome c oxidase subunit 3	1	0.999	1	9	9	9	1	1	1	1	1	2	1	0	0	0	1	0	0	0	1	1	1	1	1	2	1	0	0	0	1	0	0	0	1	1	1	1	1	2	1
sp|P00761|TRYP_PIG	P00761	TRYP_PIG		231	25.1	Sus scrofa	1:Experimental evidence at protein level	Trypsin	1	0.999	4	81	81	81	4	5	4	4	4	4	4	5	6	4	8	8	11	10	4	5	4	4	4	4	4	5	6	4	8	8	11	10	4	5	4	4	4	4	4
sp|P00920|CAH2_MOUSE	P00920	CAH2_MOUSE	Ca2	260	16.2	Mus musculus OX=10090	1:Experimental evidence at protein level	Carbonic anhydrase 2	1	0.999	3	15	15	15	1	0	2	0	2	3	3	1	1	2	0	0	0	0	1	0	2	0	2	3	3	1	1	2	0	0	0	0	1	0	2	0	2	3	3
sp|P01027|CO3_MOUSE	P01027	CO3_MOUSE	C3	1663	47.5	Mus musculus OX=10090	1:Experimental evidence at protein level	Complement C3	1	0.999	73	563	563	563	42	41	41	41	66	55	59	42	46	43	26	16	21	24	42	41	41	41	66	55	59	42	46	43	26	16	21	24	42	41	41	41	66	55	59
sp|P01029|CO4B_MOUSE	P01029	CO4B_MOUSE	C4b	1738	18.8	Mus musculus OX=10090	1:Experimental evidence at protein level	Complement C4-B	1	0.999	25	62	62	62	3	2	4	4	20	10	13	0	4	2	0	0	0	0	3	2	4	4	20	10	13	0	4	2	0	0	0	0	3	2	4	4	20	10	13
sp|P01837|IGKC_MOUSE	P01837	IGKC_MOUSE	Igkc	107	33.6	Mus musculus OX=10090	1:Experimental evidence at protein level	Immunoglobulin kappa constant	1	0.999	3	18	18	18	1	1	1	1	4	4	2	1	1	1	0	0	1	0	1	1	1	1	4	4	2	1	1	1	0	0	1	0	1	1	1	1	4	4	2
sp|P01887|B2MG_MOUSE	P01887	B2MG_MOUSE	B2m	119	29.4	Mus musculus OX=10090	1:Experimental evidence at protein level	Beta-2-microglobulin	1	0.999	5	15	15	15	1	1	1	1	4	2	3	0	0	0	1	0	1	0	1	1	1	1	4	2	3	0	0	0	1	0	1	0	1	1	1	1	4	2	3
sp|P02662|CASA1_BOVIN	P02662	CASA1_BOVIN	CSN1S1	214	8.9	Bos taurus	1:Experimental evidence at protein level	Alpha-S1-casein	1	0.999	2	18	18	18	1	1	1	1	0	0	0	2	2	2	2	2	2	2	1	1	1	1	0	0	0	2	2	2	2	2	2	2	1	1	1	1	0	0	0
sp|P03921|NU5M_MOUSE	P03921	NU5M_MOUSE	Mtnd5	607	7.2	Mus musculus OX=10090	1:Experimental evidence at protein level	NADH-ubiquinone oxidoreductase chain 5	1	0.999	3	5	5	5	0	0	1	0	2	0	1	0	1	0	0	0	0	0	0	0	1	0	2	0	1	0	1	0	0	0	0	0	0	0	1	0	2	0	1
sp|P03930|ATP8_MOUSE	P03930	ATP8_MOUSE	Mtatp8	67	43.3	Mus musculus OX=10090	1:Experimental evidence at protein level	ATP synthase protein 8	1	0.999	3	24	24	24	2	2	1	2	1	2	2	2	2	4	1	1	1	1	2	2	1	2	1	2	2	2	2	4	1	1	1	1	2	2	1	2	1	2	2
sp|P04186|CFAB_MOUSE	P04186	CFAB_MOUSE	Cfb	761	5	Mus musculus OX=10090	1:Experimental evidence at protein level	Complement factor B	1	0.999	3	7	7	7	0	0	0	1	2	1	2	1	0	0	0	0	0	0	0	0	0	1	2	1	2	1	0	0	0	0	0	0	0	0	0	1	2	1	2
sp|P04919|B3AT_MOUSE	P04919	B3AT_MOUSE	Slc4a1	929	11.2	Mus musculus OX=10090	1:Experimental evidence at protein level	Band 3 anion transport protein	1	0.999	8	15	15	15	0	0	0	0	4	6	4	1	0	0	0	0	0	0	0	0	0	0	4	6	4	1	0	0	0	0	0	0	0	0	0	0	4	6	4
sp|P05132|KAPCA_MOUSE	P05132	KAPCA_MOUSE	Prkaca	351	9.1	Mus musculus OX=10090	1:Experimental evidence at protein level	cAMP-dependent protein kinase catalytic subunit alpha	1	0.999	2	3	0	3	0	0	0	0	2	1	0	0	0	0	0	0	0	0	0	0	0	0	0	0	0	0	0	0	0	0	0	0	0	0	0	0	2	1	0
sp|P05201|AATC_MOUSE	P05201	AATC_MOUSE	Got1	413	53.8	Mus musculus OX=10090	1:Experimental evidence at protein level	Aspartate aminotransferase, cytoplasmic	1	0.999	19	118	118	118	8	9	12	7	11	13	13	7	14	12	3	1	4	4	8	9	12	7	11	13	13	7	14	12	3	1	4	4	8	9	12	7	11	13	13
sp|P05202|AATM_MOUSE	P05202	AATM_MOUSE	Got2	430	70.5	Mus musculus OX=10090	1:Experimental evidence at protein level	Aspartate aminotransferase, mitochondrial	1	0.999	33	464	464	464	33	39	33	31	49	43	46	30	33	32	25	21	23	26	33	39	33	31	49	43	46	30	33	32	25	21	23	26	33	39	33	31	49	43	46
sp|P06728|APOA4_MOUSE	P06728	APOA4_MOUSE	Apoa4	395	30.6	Mus musculus OX=10090	1:Experimental evidence at protein level	Apolipoprotein A-IV	1	0.999	7	20	20	20	0	0	0	0	4	3	2	2	4	5	0	0	0	0	0	0	0	0	4	3	2	2	4	5	0	0	0	0	0	0	0	0	4	3	2
sp|P06745|G6PI_MOUSE	P06745	G6PI_MOUSE	Gpi	558	40.7	Mus musculus OX=10090	1:Experimental evidence at protein level	Glucose-6-phosphate isomerase	1	0.999	21	110	110	110	10	10	9	10	13	18	14	7	8	6	0	0	3	2	10	10	9	10	13	18	14	7	8	6	0	0	3	2	10	10	9	10	13	18	14
sp|P06801|MAOX_MOUSE	P06801	MAOX_MOUSE	Me1	572	38.3	Mus musculus OX=10090	1:Experimental evidence at protein level	NADP-dependent malic enzyme	1	0.999	18	117	117	117	8	8	8	9	11	14	14	9	11	11	4	3	3	4	8	8	8	9	11	14	14	9	11	11	4	3	3	4	8	8	8	9	11	14	14
sp|P06802|ENPP1_MOUSE	P06802	ENPP1_MOUSE	Enpp1	906	4.2	Mus musculus OX=10090	1:Experimental evidence at protein level	Ectonucleotide pyrophosphatase/phosphodiesterase family member 1	1	0.999	3	3	3	3	0	0	0	0	0	3	0	0	0	0	0	0	0	0	0	0	0	0	0	3	0	0	0	0	0	0	0	0	0	0	0	0	0	3	0
sp|P06909|CFAH_MOUSE	P06909	CFAH_MOUSE	Cfh	1234	5.3	Mus musculus OX=10090	1:Experimental evidence at protein level	Complement factor H	1	0.999	5	33	33	33	3	3	2	2	7	5	5	0	3	3	0	0	0	0	3	3	2	2	7	5	5	0	3	3	0	0	0	0	3	3	2	2	7	5	5
sp|P07309|TTHY_MOUSE	P07309	TTHY_MOUSE	Ttr	147	15	Mus musculus OX=10090	1:Experimental evidence at protein level	Transthyretin	1	0.999	2	14	14	14	2	1	1	1	2	3	2	0	1	1	0	0	0	0	2	1	1	1	2	3	2	0	1	1	0	0	0	0	2	1	1	1	2	3	2
sp|P07356|ANXA2_MOUSE	P07356	ANXA2_MOUSE	Anxa2	339	32.4	Mus musculus OX=10090	1:Experimental evidence at protein level	Annexin A2	1	0.999	10	31	31	31	2	3	2	4	5	8	2	4	0	1	0	0	0	0	2	3	2	4	5	8	2	4	0	1	0	0	0	0	2	3	2	4	5	8	2
sp|P07724|ALBU_MOUSE	P07724	ALBU_MOUSE	Alb	608	50.2	Mus musculus OX=10090	1:Experimental evidence at protein level	Albumin	1	0.999	31	269	256	269	15	18	17	20	31	30	31	22	24	20	13	7	10	11	14	17	17	19	30	28	30	20	22	18	13	7	10	11	15	18	17	20	31	30	31
sp|P07901|HS90A_MOUSE	P07901	HS90A_MOUSE	Hsp90aa1	733	54.4	Mus musculus OX=10090	1:Experimental evidence at protein level	Heat shock protein HSP 90-alpha	1	0.999	42	296	296	490	23	22	20	23	34	32	32	22	21	20	12	11	12	12	23	22	20	23	34	32	32	22	21	20	12	11	12	12	36	35	34	37	55	57	52
sp|P08003|PDIA4_MOUSE	P08003	PDIA4_MOUSE	Pdia4	638	50.6	Mus musculus OX=10090	1:Experimental evidence at protein level	Protein disulfide-isomerase A4	1	0.999	39	371	371	371	28	29	24	33	42	41	37	31	29	30	11	12	13	11	28	29	24	33	42	41	37	31	29	30	11	12	13	11	28	29	24	33	42	41	37
sp|P08030|APT_MOUSE	P08030	APT_MOUSE	Aprt	180	18.9	Mus musculus OX=10090	1:Experimental evidence at protein level	Adenine phosphoribosyltransferase	1	0.999	3	4	4	4	0	0	0	0	1	2	1	0	0	0	0	0	0	0	0	0	0	0	1	2	1	0	0	0	0	0	0	0	0	0	0	0	1	2	1
sp|P08032|SPTA1_MOUSE	P08032	SPTA1_MOUSE	Spta1	2415	3.6	Mus musculus OX=10090	1:Experimental evidence at protein level	Spectrin alpha chain, erythrocytic 1	1	0.999	5	6	6	6	0	0	0	0	1	2	2	0	0	1	0	0	0	0	0	0	0	0	1	2	2	0	0	1	0	0	0	0	0	0	0	0	1	2	2
sp|P08113|ENPL_MOUSE	P08113	ENPL_MOUSE	Hsp90b1	802	59.1	Mus musculus OX=10090	1:Experimental evidence at protein level	Endoplasmin	1	0.999	53	546	518	546	43	39	38	41	51	49	49	39	43	41	28	27	27	31	41	37	36	38	49	47	47	37	41	39	26	25	26	29	43	39	38	41	51	49	49
sp|P08122|CO4A2_MOUSE	P08122	CO4A2_MOUSE	Col4a2	1707	4.5	Mus musculus OX=10090	1:Experimental evidence at protein level	Collagen alpha-2(IV) chain	1	0.999	3	17	17	17	2	1	0	0	3	2	2	2	3	2	0	0	0	0	2	1	0	0	3	2	2	2	3	2	0	0	0	0	2	1	0	0	3	2	2
sp|P08226|APOE_MOUSE	P08226	APOE_MOUSE	Apoe	311	55.6	Mus musculus OX=10090	1:Experimental evidence at protein level	Apolipoprotein E	1	0.999	22	188	183	188	17	11	19	20	22	20	17	12	12	13	7	6	6	6	16	11	19	20	21	19	16	12	12	12	7	6	6	6	17	11	19	20	22	20	17
sp|P08228|SODC_MOUSE	P08228	SODC_MOUSE	Sod1	154	37	Mus musculus OX=10090	1:Experimental evidence at protein level	Superoxide dismutase [Cu-Zn]	1	0.999	5	31	31	31	2	2	2	2	3	5	4	4	3	3	0	0	0	1	2	2	2	2	3	5	4	4	3	3	0	0	0	1	2	2	2	2	3	5	4
sp|P08249|MDHM_MOUSE	P08249	MDHM_MOUSE	Mdh2	338	63.3	Mus musculus OX=10090	1:Experimental evidence at protein level	Malate dehydrogenase, mitochondrial	1	0.999	18	232	232	232	18	16	16	18	27	25	26	17	18	16	10	6	10	9	18	16	16	18	27	25	26	17	18	16	10	6	10	9	18	16	16	18	27	25	26
sp|P09055|ITB1_MOUSE	P09055	ITB1_MOUSE	Itgb1	798	10.7	Mus musculus OX=10090	1:Experimental evidence at protein level	Integrin beta-1	1	0.999	8	42	42	42	3	3	2	3	6	3	5	4	6	7	0	0	0	0	3	3	2	3	6	3	5	4	6	7	0	0	0	0	3	3	2	3	6	3	5
sp|P09405|NUCL_MOUSE	P09405	NUCL_MOUSE	Ncl	707	34.5	Mus musculus OX=10090	1:Experimental evidence at protein level	Nucleolin	1	0.999	26	189	189	189	16	16	13	15	21	25	22	14	13	14	3	2	8	7	16	16	13	15	21	25	22	14	13	14	3	2	8	7	16	16	13	15	21	25	22
sp|P09528|FRIH_MOUSE	P09528	FRIH_MOUSE	Fth1	182	33	Mus musculus OX=10090	1:Experimental evidence at protein level	Ferritin heavy chain	1	0.999	6	41	41	41	1	3	3	4	3	4	6	5	4	6	0	0	0	2	1	3	3	4	3	4	6	5	4	6	0	0	0	2	1	3	3	4	3	4	6
sp|P09671|SODM_MOUSE	P09671	SODM_MOUSE	Sod2	222	41.9	Mus musculus OX=10090	1:Experimental evidence at protein level	Superoxide dismutase [Mn], mitochondrial	1	0.999	10	109	109	109	8	7	7	7	11	10	11	8	7	7	6	6	7	7	8	7	7	7	11	10	11	8	7	7	6	6	7	7	8	7	7	7	11	10	11
sp|P09813|APOA2_MOUSE	P09813	APOA2_MOUSE	Apoa2	102	18.6	Mus musculus OX=10090	1:Experimental evidence at protein level	Apolipoprotein A-II	1	0.999	2	20	20	20	2	2	2	2	3	2	1	2	2	1	1	0	0	0	2	2	2	2	3	2	1	2	2	1	1	0	0	0	2	2	2	2	3	2	1
sp|P0C0S6|H2AZ_MOUSE	P0C0S6	H2AZ_MOUSE	H2az1	128	53.9	Mus musculus OX=10090	1:Experimental evidence at protein level	Histone H2A.Z	1	0.999	5	28	0	58	3	2	2	2	3	3	3	1	3	2	1	1	1	1	0	0	0	0	0	0	0	0	0	0	0	0	0	0	6	5	4	4	5	5	5
sp|P0CG49|UBB_MOUSE	P0CG49	UBB_MOUSE	Ubb	305	72.1	Mus musculus OX=10090	2:Experimental evidence at transcript level	Polyubiquitin-B	1	0.999	7	144	0	144	9	8	9	11	21	20	21	9	13	10	3	3	3	4	0	0	0	0	0	0	0	0	0	0	0	0	0	0	9	8	9	11	21	20	21
sp|P0DN34|NDUB1_MOUSE	P0DN34	NDUB1_MOUSE	Ndufb1	57	19.3	Mus musculus OX=10090	1:Experimental evidence at protein level	NADH dehydrogenase [ubiquinone] 1 beta subcomplex subunit 1	1	0.999	1	12	12	12	1	1	1	1	1	1	1	1	1	1	1	0	0	1	1	1	1	1	1	1	1	1	1	1	1	0	0	1	1	1	1	1	1	1	1
sp|P10126|EF1A1_MOUSE	P10126	EF1A1_MOUSE	Eef1a1	462	51.5	Mus musculus OX=10090	1:Experimental evidence at protein level	Elongation factor 1-alpha 1	1	0.999	22	284	137	284	20	20	23	19	27	30	25	18	19	19	17	14	16	17	10	11	10	10	12	15	13	8	10	8	9	6	7	8	20	20	23	19	27	30	25
sp|P10518|HEM2_MOUSE	P10518	HEM2_MOUSE	Alad	330	38.5	Mus musculus OX=10090	1:Experimental evidence at protein level	Delta-aminolevulinic acid dehydratase	1	0.999	11	58	58	58	4	4	3	8	8	8	7	5	4	3	0	2	0	2	4	4	3	8	8	8	7	5	4	3	0	2	0	2	4	4	3	8	8	8	7
sp|P10605|CATB_MOUSE	P10605	CATB_MOUSE	Ctsb	339	18.3	Mus musculus OX=10090	1:Experimental evidence at protein level	Cathepsin B	1	0.999	3	3	3	3	0	0	0	0	2	1	0	0	0	0	0	0	0	0	0	0	0	0	2	1	0	0	0	0	0	0	0	0	0	0	0	0	2	1	0
sp|P10630|IF4A2_MOUSE	P10630	IF4A2_MOUSE	Eif4a2	407	46.2	Mus musculus OX=10090	1:Experimental evidence at protein level	Eukaryotic initiation factor 4A-II	1	0.999	22	26	26	135	2	3	1	2	2	5	3	2	3	3	0	0	0	0	2	3	1	2	2	5	3	2	3	3	0	0	0	0	12	12	9	10	12	13	14
sp|P10649|GSTM1_MOUSE	P10649	GSTM1_MOUSE	Gstm1	218	86.2	Mus musculus OX=10090	1:Experimental evidence at protein level	Glutathione S-transferase Mu 1	1	0.999	25	403	300	403	29	25	27	29	41	51	43	24	22	24	22	25	21	20	20	17	20	20	35	45	35	17	16	17	15	17	13	13	29	25	27	29	41	51	43
sp|P10711|TCEA1_MOUSE	P10711	TCEA1_MOUSE	Tcea1	301	11.3	Mus musculus OX=10090	1:Experimental evidence at protein level	Transcription elongation factor A protein 1	1	0.999	2	5	5	5	0	0	0	0	3	1	1	0	0	0	0	0	0	0	0	0	0	0	3	1	1	0	0	0	0	0	0	0	0	0	0	0	3	1	1
sp|P10922|H10_MOUSE	P10922	H10_MOUSE	H1-0	194	11.3	Mus musculus OX=10090	2:Experimental evidence at transcript level	Histone H1.0	1	0.999	2	9	9	9	0	0	0	0	1	2	1	2	1	2	0	0	0	0	0	0	0	0	1	2	1	2	1	2	0	0	0	0	0	0	0	0	1	2	1
sp|P11087|CO1A1_MOUSE	P11087	CO1A1_MOUSE	Col1a1	1453	4.6	Mus musculus OX=10090	1:Experimental evidence at protein level	Collagen alpha-1(I) chain	1	0.999	3	15	15	15	0	0	0	0	2	1	3	3	3	3	0	0	0	0	0	0	0	0	2	1	3	3	3	3	0	0	0	0	0	0	0	0	2	1	3
sp|P11276|FINC_MOUSE	P11276	FINC_MOUSE	Fn1	2477	21.7	Mus musculus OX=10090	1:Experimental evidence at protein level	Fibronectin	1	0.999	41	197	197	197	14	14	15	14	32	30	31	14	16	14	0	0	1	2	14	14	15	14	32	30	31	14	16	14	0	0	1	2	14	14	15	14	32	30	31
sp|P11352|GPX1_MOUSE	P11352	GPX1_MOUSE	Gpx1	201	79.6	Mus musculus OX=10090	1:Experimental evidence at protein level	Glutathione peroxidase 1	1	0.999	13	172	172	172	13	14	14	13	15	15	16	12	13	14	8	8	9	8	13	14	14	13	15	15	16	12	13	14	8	8	9	8	13	14	14	13	15	15	16
sp|P11404|FABPH_MOUSE	P11404	FABPH_MOUSE	Fabp3	133	23.3	Mus musculus OX=10090	1:Experimental evidence at protein level	Fatty acid-binding protein, heart	1	0.999	3	4	4	4	0	1	0	1	0	0	2	0	0	0	0	0	0	0	0	1	0	1	0	0	2	0	0	0	0	0	0	0	0	1	0	1	0	0	2
sp|P11438|LAMP1_MOUSE	P11438	LAMP1_MOUSE	Lamp1	406	3	Mus musculus OX=10090	1:Experimental evidence at protein level	Lysosome-associated membrane glycoprotein 1	1	0.999	1	6	6	6	0	0	0	0	1	2	1	0	1	1	0	0	0	0	0	0	0	0	1	2	1	0	1	1	0	0	0	0	0	0	0	0	1	2	1
sp|P11499|HS90B_MOUSE	P11499	HS90B_MOUSE	Hsp90ab1	724	55.2	Mus musculus OX=10090	1:Experimental evidence at protein level	Heat shock protein HSP 90-beta	1	0.999	47	503	309	531	35	35	36	39	52	57	50	34	33	32	22	27	24	27	22	22	22	25	31	32	30	22	21	21	13	17	14	17	37	37	38	42	54	59	52
sp|P11688|ITA5_MOUSE	P11688	ITA5_MOUSE	Itga5	1053	2.1	Mus musculus OX=10090	1:Experimental evidence at protein level	Integrin alpha-5	1	0.9988	2	8	8	8	0	1	1	1	1	1	2	0	0	1	0	0	0	0	0	1	1	1	1	1	2	0	0	1	0	0	0	0	0	1	1	1	1	1	2
sp|P11725|OTC_MOUSE	P11725	OTC_MOUSE	Otc	354	84.7	Mus musculus OX=10090	1:Experimental evidence at protein level	Ornithine transcarbamylase, mitochondrial	1	0.999	27	401	401	401	33	29	26	23	46	47	43	20	30	23	22	20	19	20	33	29	26	23	46	47	43	20	30	23	22	20	19	20	33	29	26	23	46	47	43
sp|P11862|GAS2_MOUSE	P11862	GAS2_MOUSE	Gas2	314	16.9	Mus musculus OX=10090	1:Experimental evidence at protein level	Growth arrest-specific protein 2	1	0.999	3	4	4	4	1	0	0	0	2	0	0	0	1	0	0	0	0	0	1	0	0	0	2	0	0	0	1	0	0	0	0	0	1	0	0	0	2	0	0
sp|P11930|NUD19_MOUSE	P11930	NUD19_MOUSE	Nudt19	357	18.8	Mus musculus OX=10090	1:Experimental evidence at protein level	Acyl-coenzyme A diphosphatase NUDT19	1	0.999	5	22	22	22	2	2	3	2	4	2	3	0	1	3	0	0	0	0	2	2	3	2	4	2	3	0	1	3	0	0	0	0	2	2	3	2	4	2	3
sp|P11983|TCPA_MOUSE	P11983	TCPA_MOUSE	Tcp1	556	39.2	Mus musculus OX=10090	1:Experimental evidence at protein level	T-complex protein 1 subunit alpha	1	0.999	20	119	119	119	7	9	10	11	14	15	15	9	7	9	2	3	3	5	7	9	10	11	14	15	15	9	7	9	2	3	3	5	7	9	10	11	14	15	15
sp|P12265|BGLR_MOUSE	P12265	BGLR_MOUSE	Gusb	648	4.3	Mus musculus OX=10090	1:Experimental evidence at protein level	Beta-glucuronidase	1	0.999	3	4	4	4	0	0	0	0	1	1	0	0	0	2	0	0	0	0	0	0	0	0	1	1	0	0	0	2	0	0	0	0	0	0	0	0	1	1	0
sp|P12710|FABPL_MOUSE	P12710	FABPL_MOUSE	Fabp1	127	85.8	Mus musculus OX=10090	1:Experimental evidence at protein level	Fatty acid-binding protein, liver	1	0.999	12	171	171	171	13	10	10	12	21	21	19	11	13	11	8	8	7	7	13	10	10	12	21	21	19	11	13	11	8	8	7	7	13	10	10	12	21	21	19
sp|P12787|COX5A_MOUSE	P12787	COX5A_MOUSE	Cox5a	146	59.6	Mus musculus OX=10090	1:Experimental evidence at protein level	Cytochrome c oxidase subunit 5A, mitochondrial	1	0.999	8	85	85	85	7	7	7	4	9	9	9	6	8	8	3	3	2	3	7	7	7	4	9	9	9	6	8	8	3	3	2	3	7	7	7	4	9	9	9
sp|P12815|PDCD6_MOUSE	P12815	PDCD6_MOUSE	Pdcd6	191	19.9	Mus musculus OX=10090	1:Experimental evidence at protein level	Programmed cell death protein 6	1	0.999	3	22	22	22	2	3	1	1	3	3	3	1	1	2	0	0	1	1	2	3	1	1	3	3	3	1	1	2	0	0	1	1	2	3	1	1	3	3	3
sp|P12970|RL7A_MOUSE	P12970	RL7A_MOUSE	Rpl7a	266	48.5	Mus musculus OX=10090	1:Experimental evidence at protein level	60S ribosomal protein L7a	1	0.999	17	150	150	150	12	12	10	12	15	15	14	7	11	9	8	8	9	8	12	12	10	12	15	15	14	7	11	9	8	8	9	8	12	12	10	12	15	15	14
sp|P13439|UMPS_MOUSE	P13439	UMPS_MOUSE	Umps	481	14.1	Mus musculus OX=10090	1:Experimental evidence at protein level	Uridine 5'-monophosphate synthase	1	0.999	4	8	8	8	0	0	1	0	1	2	3	0	0	1	0	0	0	0	0	0	1	0	1	2	3	0	0	1	0	0	0	0	0	0	1	0	1	2	3
sp|P14094|AT1B1_MOUSE	P14094	AT1B1_MOUSE	Atp1b1	304	25	Mus musculus OX=10090	1:Experimental evidence at protein level	Sodium/potassium-transporting ATPase subunit beta-1	1	0.999	3	24	24	24	2	2	3	2	3	2	2	1	0	2	1	0	3	1	2	2	3	2	3	2	2	1	0	2	1	0	3	1	2	2	3	2	3	2	2
sp|P14115|RL27A_MOUSE	P14115	RL27A_MOUSE	Rpl27a	148	27.7	Mus musculus OX=10090	1:Experimental evidence at protein level	60S ribosomal protein L27a	1	0.999	4	10	10	10	0	0	0	0	2	2	2	1	0	2	0	1	0	0	0	0	0	0	2	2	2	1	0	2	0	1	0	0	0	0	0	0	2	2	2
sp|P14131|RS16_MOUSE	P14131	RS16_MOUSE	Rps16	146	63	Mus musculus OX=10090	1:Experimental evidence at protein level	40S ribosomal protein S16	1	0.999	12	92	92	92	8	10	11	8	7	6	8	7	5	6	4	2	5	5	8	10	11	8	7	6	8	7	5	6	4	2	5	5	8	10	11	8	7	6	8
sp|P14148|RL7_MOUSE	P14148	RL7_MOUSE	Rpl7	270	53	Mus musculus OX=10090	1:Experimental evidence at protein level	60S ribosomal protein L7	1	0.999	22	173	173	173	14	15	16	18	18	19	16	10	10	12	6	6	5	8	14	15	16	18	18	19	16	10	10	12	6	6	5	8	14	15	16	18	18	19	16
sp|P14152|MDHC_MOUSE	P14152	MDHC_MOUSE	Mdh1	334	51.2	Mus musculus OX=10090	1:Experimental evidence at protein level	Malate dehydrogenase, cytoplasmic	1	0.999	17	165	165	165	14	13	13	13	14	16	15	10	13	9	10	7	9	9	14	13	13	13	14	16	15	10	13	9	10	7	9	9	14	13	13	13	14	16	15
sp|P14206|RSSA_MOUSE	P14206	RSSA_MOUSE	Rpsa	295	54.2	Mus musculus OX=10090	1:Experimental evidence at protein level	40S ribosomal protein SA	1	0.999	15	95	95	95	8	6	5	5	12	12	13	6	6	6	4	3	4	5	8	6	5	5	12	12	13	6	6	6	4	3	4	5	8	6	5	5	12	12	13
sp|P14211|CALR_MOUSE	P14211	CALR_MOUSE	Calr	416	60.6	Mus musculus OX=10090	1:Experimental evidence at protein level	Calreticulin	1	0.999	24	252	252	252	15	16	17	20	29	24	24	19	19	21	13	13	11	11	15	16	17	20	29	24	24	19	19	21	13	13	11	11	15	16	17	20	29	24	24
sp|P14576|SRP54_MOUSE	P14576	SRP54_MOUSE	Srp54	504	21.6	Mus musculus OX=10090	1:Experimental evidence at protein level	Signal recognition particle 54 kDa protein	1	0.999	8	31	31	31	2	2	1	2	6	9	6	0	1	2	0	0	0	0	2	2	1	2	6	9	6	0	1	2	0	0	0	0	2	2	1	2	6	9	6
sp|P14602|HSPB1_MOUSE	P14602	HSPB1_MOUSE	Hspb1	209	29.7	Mus musculus OX=10090	1:Experimental evidence at protein level	Heat shock protein beta-1	1	0.999	5	8	8	8	0	0	0	1	0	1	0	5	0	1	0	0	0	0	0	0	0	1	0	1	0	5	0	1	0	0	0	0	0	0	0	1	0	1	0
sp|P14685|PSMD3_MOUSE	P14685	PSMD3_MOUSE	Psmd3	530	45.3	Mus musculus OX=10090	1:Experimental evidence at protein level	26S proteasome non-ATPase regulatory subunit 3	1	0.999	23	96	96	96	5	6	3	10	11	12	14	13	9	10	1	0	1	1	5	6	3	10	11	12	14	13	9	10	1	0	1	1	5	6	3	10	11	12	14
sp|P14733|LMNB1_MOUSE	P14733	LMNB1_MOUSE	Lmnb1	588	41.7	Mus musculus OX=10090	1:Experimental evidence at protein level	Lamin-B1	1	0.999	24	75	75	102	5	7	3	11	12	8	10	5	4	7	0	0	2	1	5	7	3	11	12	8	10	5	4	7	0	0	2	1	8	8	5	14	15	12	13
sp|P14824|ANXA6_MOUSE	P14824	ANXA6_MOUSE	Anxa6	673	54.4	Mus musculus OX=10090	1:Experimental evidence at protein level	Annexin A6	1	0.999	37	274	267	274	25	22	19	21	31	24	29	22	23	22	10	6	10	10	25	22	19	21	29	23	28	21	22	21	10	6	10	10	25	22	19	21	31	24	29
sp|P14901|HMOX1_MOUSE	P14901	HMOX1_MOUSE	Hmox1	289	10.4	Mus musculus OX=10090	1:Experimental evidence at protein level	Heme oxygenase 1	1	0.999	2	3	3	3	0	1	0	0	1	0	0	0	0	1	0	0	0	0	0	1	0	0	1	0	0	0	0	1	0	0	0	0	0	1	0	0	1	0	0
sp|P15105|GLNA_MOUSE	P15105	GLNA_MOUSE	Glul	373	49.6	Mus musculus OX=10090	1:Experimental evidence at protein level	Glutamine synthetase	1	0.999	21	61	61	61	0	1	0	9	2	7	2	38	1	1	0	0	0	0	0	1	0	9	2	7	2	38	1	1	0	0	0	0	0	1	0	9	2	7	2
sp|P15208|INSR_MOUSE	P15208	INSR_MOUSE	Insr	1372	2.5	Mus musculus OX=10090	1:Experimental evidence at protein level	Insulin receptor	1	0.999	2	4	4	4	0	0	0	0	2	0	2	0	0	0	0	0	0	0	0	0	0	0	2	0	2	0	0	0	0	0	0	0	0	0	0	0	2	0	2
sp|P15392|CP2A4_MOUSE	P15392	CP2A4_MOUSE	Cyp2a4	494	52.8	Mus musculus OX=10090	2:Experimental evidence at transcript level	Cytochrome P450 2A4	1	0.999	25	142	48	142	11	13	12	8	13	18	17	9	13	8	6	3	5	6	5	5	4	3	3	5	5	1	5	3	2	2	2	3	11	13	12	8	13	18	17
sp|P15532|NDKA_MOUSE	P15532	NDKA_MOUSE	Nme1	152	55.3	Mus musculus OX=10090	1:Experimental evidence at protein level	Nucleoside diphosphate kinase A	1	0.9989	10	12	12	60	0	0	0	0	2	3	2	1	3	1	0	0	0	0	0	0	0	0	2	3	2	1	3	1	0	0	0	0	3	4	4	3	6	8	7
sp|P15626|GSTM2_MOUSE	P15626	GSTM2_MOUSE	Gstm2	218	71.1	Mus musculus OX=10090	1:Experimental evidence at protein level	Glutathione S-transferase Mu 2	1	0.999	18	46	41	104	0	1	0	10	3	11	5	11	0	4	0	1	0	0	0	1	0	8	3	10	5	9	0	4	0	1	0	0	4	4	3	15	8	17	11
sp|P16015|CAH3_MOUSE	P16015	CAH3_MOUSE	Ca3	260	73.5	Mus musculus OX=10090	1:Experimental evidence at protein level	Carbonic anhydrase 3	1	0.999	18	158	158	158	12	12	10	13	18	15	18	11	13	14	4	7	6	5	12	12	10	13	18	15	18	11	13	14	4	7	6	5	12	12	10	13	18	15	18
sp|P16110|LEG3_MOUSE	P16110	LEG3_MOUSE	Lgals3	264	11.7	Mus musculus OX=10090	1:Experimental evidence at protein level	Galectin-3	1	0.999	3	5	5	5	0	0	0	0	3	1	1	0	0	0	0	0	0	0	0	0	0	0	3	1	1	0	0	0	0	0	0	0	0	0	0	0	3	1	1
sp|P16331|PH4H_MOUSE	P16331	PH4H_MOUSE	Pah	453	63.8	Mus musculus OX=10090	1:Experimental evidence at protein level	Phenylalanine-4-hydroxylase	1	0.999	32	308	308	308	25	25	22	25	31	31	26	23	18	16	17	18	15	16	25	25	22	25	31	31	26	23	18	16	17	18	15	16	25	25	22	25	31	31	26
sp|P16332|MUTA_MOUSE	P16332	MUTA_MOUSE	Mmut	748	43.4	Mus musculus OX=10090	1:Experimental evidence at protein level	Methylmalonyl-CoA mutase, mitochondrial	1	0.999	26	166	166	166	12	10	9	8	25	18	22	13	17	16	3	2	5	6	12	10	9	8	25	18	22	13	17	16	3	2	5	6	12	10	9	8	25	18	22
sp|P16406|AMPE_MOUSE	P16406	AMPE_MOUSE	Enpep	945	12.4	Mus musculus OX=10090	1:Experimental evidence at protein level	Glutamyl aminopeptidase	1	0.999	11	42	42	42	5	5	5	4	7	4	8	0	1	2	0	0	0	1	5	5	5	4	7	4	8	0	1	2	0	0	0	1	5	5	5	4	7	4	8
sp|P16460|ASSY_MOUSE	P16460	ASSY_MOUSE	Ass1	412	83.5	Mus musculus OX=10090	1:Experimental evidence at protein level	Argininosuccinate synthase	1	0.999	46	687	687	687	59	62	57	47	72	57	62	28	53	42	40	34	36	38	59	62	57	47	72	57	62	28	53	42	40	34	36	38	59	62	57	47	72	57	62
sp|P16546|SPTN1_MOUSE	P16546	SPTN1_MOUSE	Sptan1	2472	42.3	Mus musculus OX=10090	1:Experimental evidence at protein level	Spectrin alpha chain, non-erythrocytic 1	1	0.999	92	467	467	467	35	33	30	31	68	60	65	34	47	49	3	1	5	6	35	33	30	31	68	60	65	34	47	49	3	1	5	6	35	33	30	31	68	60	65
sp|P16675|PPGB_MOUSE	P16675	PPGB_MOUSE	Ctsa	474	11.6	Mus musculus OX=10090	1:Experimental evidence at protein level	Lysosomal protective protein	1	0.999	5	12	12	12	0	0	0	0	2	2	4	2	0	2	0	0	0	0	0	0	0	0	2	2	4	2	0	2	0	0	0	0	0	0	0	0	2	2	4
sp|P17047|LAMP2_MOUSE	P17047	LAMP2_MOUSE	Lamp2	415	8.4	Mus musculus OX=10090	1:Experimental evidence at protein level	Lysosome-associated membrane glycoprotein 2	1	0.999	4	22	22	22	3	2	2	3	3	2	3	1	1	0	0	1	1	0	3	2	2	3	3	2	3	1	1	0	0	1	1	0	3	2	2	3	3	2	3
sp|P17225|PTBP1_MOUSE	P17225	PTBP1_MOUSE	Ptbp1	527	21.1	Mus musculus OX=10090	1:Experimental evidence at protein level	Polypyrimidine tract-binding protein 1	1	0.999	7	45	21	45	4	3	3	2	4	4	5	3	6	4	3	1	2	1	2	1	1	0	2	2	2	2	4	3	1	0	1	0	4	3	3	2	4	4	5
sp|P17426|AP2A1_MOUSE	P17426	AP2A1_MOUSE	Ap2a1	977	13.5	Mus musculus OX=10090	1:Experimental evidence at protein level	AP-2 complex subunit alpha-1	1	0.999	12	8	8	38	0	0	0	0	1	3	3	0	0	0	0	0	1	0	0	0	0	0	1	3	3	0	0	0	0	0	1	0	2	2	2	2	5	6	5
sp|P17427|AP2A2_MOUSE	P17427	AP2A2_MOUSE	Ap2a2	938	30.9	Mus musculus OX=10090	1:Experimental evidence at protein level	AP-2 complex subunit alpha-2	1	0.999	25	108	78	108	7	5	6	4	19	15	15	9	11	12	1	1	1	2	5	3	4	2	15	12	13	5	8	10	0	0	0	1	7	5	6	4	19	15	15
sp|P17665|COX7C_MOUSE	P17665	COX7C_MOUSE	Cox7c	63	65.1	Mus musculus OX=10090	1:Experimental evidence at protein level	Cytochrome c oxidase subunit 7C, mitochondrial	1	0.999	4	32	32	32	3	2	2	2	1	4	3	2	4	2	2	1	2	2	3	2	2	2	1	4	3	2	4	2	2	1	2	2	3	2	2	2	1	4	3
sp|P17751|TPIS_MOUSE	P17751	TPIS_MOUSE	Tpi1	249	56.2	Mus musculus OX=10090	1:Experimental evidence at protein level	Triosephosphate isomerase	1	0.999	11	75	75	75	6	6	7	7	9	9	9	4	8	6	2	0	1	1	6	6	7	7	9	9	9	4	8	6	2	0	1	1	6	6	7	7	9	9	9
sp|P17879|HS71B_MOUSE	P17879	HS71B_MOUSE	Hspa1b	642	21.8	Mus musculus OX=10090	1:Experimental evidence at protein level	Heat shock 70 kDa protein 1B	1	0.999	9	11	0	71	0	0	0	0	1	2	0	4	1	3	0	0	0	0	0	0	0	0	0	0	0	0	0	0	0	0	0	0	4	4	5	4	5	6	6
sp|P18242|CATD_MOUSE	P18242	CATD_MOUSE	Ctsd	410	15.9	Mus musculus OX=10090	1:Experimental evidence at protein level	Cathepsin D	1	0.999	5	36	36	36	3	3	3	3	3	3	4	4	4	5	0	0	0	1	3	3	3	3	3	3	4	4	4	5	0	0	0	1	3	3	3	3	3	3	4
sp|P18572|BASI_MOUSE	P18572	BASI_MOUSE	Bsg	389	25.7	Mus musculus OX=10090	1:Experimental evidence at protein level	Basigin	1	0.999	10	48	48	48	3	3	3	3	5	8	5	6	4	5	0	1	1	1	3	3	3	3	5	8	5	6	4	5	0	1	1	1	3	3	3	3	5	8	5
sp|P18760|COF1_MOUSE	P18760	COF1_MOUSE	Cfl1	166	77.7	Mus musculus OX=10090	1:Experimental evidence at protein level	Cofilin-1	1	0.999	14	97	70	97	7	8	6	9	11	11	10	7	9	6	4	3	3	3	5	6	4	5	8	8	8	5	8	5	3	2	2	1	7	8	6	9	11	11	10
sp|P18828|SDC1_MOUSE	P18828	SDC1_MOUSE	Sdc1	311	17.4	Mus musculus OX=10090	1:Experimental evidence at protein level	Syndecan-1	1	0.999	3	10	10	10	1	0	1	0	2	2	3	0	1	0	0	0	0	0	1	0	1	0	2	2	3	0	1	0	0	0	0	0	1	0	1	0	2	2	3
sp|P19096|FAS_MOUSE	P19096	FAS_MOUSE	Fasn	2504	50.5	Mus musculus OX=10090	1:Experimental evidence at protein level	Fatty acid synthase	1	0.999	101	967	967	967	82	81	78	76	93	94	106	57	72	66	39	37	42	44	82	81	78	76	93	94	106	57	72	66	39	37	42	44	82	81	78	76	93	94	106
sp|P19221|THRB_MOUSE	P19221	THRB_MOUSE	F2	618	10.4	Mus musculus OX=10090	1:Experimental evidence at protein level	Prothrombin	1	0.999	4	12	12	12	1	1	0	1	2	1	1	1	2	2	0	0	0	0	1	1	0	1	2	1	1	1	2	2	0	0	0	0	1	1	0	1	2	1	1
sp|P19253|RL13A_MOUSE	P19253	RL13A_MOUSE	Rpl13a	203	37.4	Mus musculus OX=10090	1:Experimental evidence at protein level	60S ribosomal protein L13a	1	0.999	10	81	81	81	7	6	6	7	11	7	9	4	5	4	3	3	4	5	7	6	6	7	11	7	9	4	5	4	3	3	4	5	7	6	6	7	11	7	9
sp|P19324|SERPH_MOUSE	P19324	SERPH_MOUSE	Serpinh1	417	6.7	Mus musculus OX=10090	1:Experimental evidence at protein level	Serpin H1	1	0.999	2	3	3	3	0	0	0	0	0	2	1	0	0	0	0	0	0	0	0	0	0	0	0	2	1	0	0	0	0	0	0	0	0	0	0	0	0	2	1
sp|P19536|COX5B_MOUSE	P19536	COX5B_MOUSE	Cox5b	128	35.9	Mus musculus OX=10090	1:Experimental evidence at protein level	Cytochrome c oxidase subunit 5B, mitochondrial	1	0.999	7	62	62	62	5	5	2	3	9	7	5	3	10	7	2	2	1	1	5	5	2	3	9	7	5	3	10	7	2	2	1	1	5	5	2	3	9	7	5
sp|P19639|GSTM3_MOUSE	P19639	GSTM3_MOUSE	Gstm3	218	83	Mus musculus OX=10090	1:Experimental evidence at protein level	Glutathione S-transferase Mu 3	1	0.999	20	43	23	115	1	1	0	8	5	10	6	9	0	0	1	1	1	0	0	0	0	5	2	6	3	7	0	0	0	0	0	0	8	7	5	15	9	14	12
sp|P19783|COX41_MOUSE	P19783	COX41_MOUSE	Cox4i1	169	47.3	Mus musculus OX=10090	1:Experimental evidence at protein level	Cytochrome c oxidase subunit 4 isoform 1, mitochondrial	1	0.999	9	130	130	130	11	11	10	11	10	9	9	8	10	9	9	7	8	8	11	11	10	11	10	9	9	8	10	9	9	7	8	8	11	11	10	11	10	9	9
sp|P20029|BIP_MOUSE	P20029	BIP_MOUSE	Hspa5	655	61.4	Mus musculus OX=10090	1:Experimental evidence at protein level	Endoplasmic reticulum chaperone BiP	1	0.999	45	587	554	587	45	44	46	45	54	53	58	33	39	37	36	32	31	34	43	42	43	43	52	50	54	31	37	34	34	30	29	32	45	44	46	45	54	53	58
sp|P20108|PRDX3_MOUSE	P20108	PRDX3_MOUSE	Prdx3	257	43.2	Mus musculus OX=10090	1:Experimental evidence at protein level	Thioredoxin-dependent peroxide reductase, mitochondrial	1	0.999	9	58	58	58	3	2	5	4	5	6	6	5	6	5	2	4	3	2	3	2	5	4	5	6	6	5	6	5	2	4	3	2	3	2	5	4	5	6	6
sp|P20491|FCERG_MOUSE	P20491	FCERG_MOUSE	Fcer1g	86	23.3	Mus musculus OX=10090	1:Experimental evidence at protein level	High affinity immunoglobulin epsilon receptor subunit gamma	1	0.999	2	4	4	4	0	0	0	0	2	1	1	0	0	0	0	0	0	0	0	0	0	0	2	1	1	0	0	0	0	0	0	0	0	0	0	0	2	1	1
sp|P20852|CP2A5_MOUSE	P20852	CP2A5_MOUSE	Cyp2a5	494	54.3	Mus musculus OX=10090	2:Experimental evidence at transcript level	Cytochrome P450 2A5	1	0.999	25	9	9	127	0	0	0	1	0	2	2	4	0	0	0	0	0	0	0	0	0	1	0	2	2	4	0	0	0	0	0	0	8	10	10	8	11	17	16
sp|P20918|PLMN_MOUSE	P20918	PLMN_MOUSE	Plg	812	17.4	Mus musculus OX=10090	1:Experimental evidence at protein level	Plasminogen	1	0.999	12	73	73	73	5	5	5	6	12	13	9	5	4	4	2	0	1	2	5	5	5	6	12	13	9	5	4	4	2	0	1	2	5	5	5	6	12	13	9
sp|P21107|TPM3_MOUSE	P21107	TPM3_MOUSE	Tpm3	285	29.5	Mus musculus OX=10090	1:Experimental evidence at protein level	Tropomyosin alpha-3 chain	1	0.999	15	110	45	110	9	8	8	10	16	12	13	7	6	8	3	2	4	4	4	2	3	3	8	5	5	3	2	4	1	1	2	2	9	8	8	10	16	12	13
sp|P21614|VTDB_MOUSE	P21614	VTDB_MOUSE	Gc	476	19.5	Mus musculus OX=10090	1:Experimental evidence at protein level	Vitamin D-binding protein	1	0.999	10	56	56	56	5	4	6	4	10	7	5	4	6	4	0	0	0	1	5	4	6	4	10	7	5	4	6	4	0	0	0	1	5	4	6	4	10	7	5
sp|P21619|LMNB2_MOUSE	P21619	LMNB2_MOUSE	Lmnb2	596	48	Mus musculus OX=10090	1:Experimental evidence at protein level	Lamin-B2	1	0.999	28	109	100	127	8	5	3	7	18	18	17	10	7	14	0	0	1	1	7	5	2	5	17	16	16	10	7	13	0	0	1	1	10	6	4	8	20	20	19
sp|P21981|TGM2_MOUSE	P21981	TGM2_MOUSE	Tgm2	686	39.2	Mus musculus OX=10090	1:Experimental evidence at protein level	Protein-glutamine gamma-glutamyltransferase 2	1	0.999	26	181	181	181	14	15	15	17	22	18	23	13	11	14	4	4	6	5	14	15	15	17	22	18	23	13	11	14	4	4	6	5	14	15	15	17	22	18	23
sp|P22315|HEMH_MOUSE	P22315	HEMH_MOUSE	Fech	420	46.7	Mus musculus OX=10090	1:Experimental evidence at protein level	Ferrochelatase, mitochondrial	1	0.999	20	71	71	71	7	5	4	3	15	9	12	6	5	5	0	0	0	0	7	5	4	3	15	9	12	6	5	5	0	0	0	0	7	5	4	3	15	9	12
sp|P22892|AP1G1_MOUSE	P22892	AP1G1_MOUSE	Ap1g1	822	6.4	Mus musculus OX=10090	1:Experimental evidence at protein level	AP-1 complex subunit gamma-1	1	0.999	6	25	25	25	2	2	2	4	4	4	3	1	2	1	0	0	0	0	2	2	2	4	4	4	3	1	2	1	0	0	0	0	2	2	2	4	4	4	3
sp|P23198|CBX3_MOUSE	P23198	CBX3_MOUSE	Cbx3	183	26.2	Mus musculus OX=10090	1:Experimental evidence at protein level	Chromobox protein homolog 3	1	0.999	2	8	8	8	0	0	0	0	2	2	2	0	1	1	0	0	0	0	0	0	0	0	2	2	2	0	1	1	0	0	0	0	0	0	0	0	2	2	2
sp|P23249|MOV10_MOUSE	P23249	MOV10_MOUSE	Mov10	1004	6.7	Mus musculus OX=10090	1:Experimental evidence at protein level	Putative helicase MOV-10	1	0.999	5	13	13	13	0	0	0	0	5	5	3	0	0	0	0	0	0	0	0	0	0	0	5	5	3	0	0	0	0	0	0	0	0	0	0	0	5	5	3
sp|P23492|PNPH_MOUSE	P23492	PNPH_MOUSE	Pnp	289	62.6	Mus musculus OX=10090	1:Experimental evidence at protein level	Purine nucleoside phosphorylase	1	0.999	14	126	126	126	10	9	9	10	15	17	17	8	8	10	2	3	4	4	10	9	9	10	15	17	17	8	8	10	2	3	4	4	10	9	9	10	15	17	17
sp|P23589|CAH5A_MOUSE	P23589	CAH5A_MOUSE	Ca5a	299	18.7	Mus musculus OX=10090	1:Experimental evidence at protein level	Carbonic anhydrase 5A, mitochondrial	1	0.999	4	14	14	14	0	0	0	0	3	2	2	1	2	4	0	0	0	0	0	0	0	0	3	2	2	1	2	4	0	0	0	0	0	0	0	0	3	2	2
sp|P23591|FCL_MOUSE	P23591	FCL_MOUSE	Gfus	321	14.6	Mus musculus OX=10090	1:Experimental evidence at protein level	GDP-L-fucose synthase	1	0.999	2	4	4	4	0	0	0	0	1	2	1	0	0	0	0	0	0	0	0	0	0	0	1	2	1	0	0	0	0	0	0	0	0	0	0	0	1	2	1
sp|P23953|EST1C_MOUSE	P23953	EST1C_MOUSE	Ces1c	554	30	Mus musculus OX=10090	1:Experimental evidence at protein level	Carboxylesterase 1C	1	0.999	13	58	58	92	5	4	3	4	7	9	6	7	5	5	1	1	0	1	5	4	3	4	7	9	6	7	5	5	1	1	0	1	7	6	5	6	10	12	9
sp|P24369|PPIB_MOUSE	P24369	PPIB_MOUSE	Ppib	216	56.5	Mus musculus OX=10090	1:Experimental evidence at protein level	Peptidyl-prolyl cis-trans isomerase B	1	0.999	13	160	160	160	14	15	13	12	18	15	16	10	14	12	6	4	5	6	14	15	13	12	18	15	16	10	14	12	6	4	5	6	14	15	13	12	18	15	16
sp|P24456|CP2DA_MOUSE	P24456	CP2DA_MOUSE	Cyp2d10	504	52	Mus musculus OX=10090	1:Experimental evidence at protein level	Cytochrome P450 2D10	1	0.999	25	156	115	249	11	11	10	14	17	17	14	10	10	11	8	8	8	7	8	8	8	9	14	15	10	6	6	7	6	6	6	6	17	19	18	22	27	28	23
sp|P24457|CP2DB_MOUSE	P24457	CP2DB_MOUSE	Cyp2d11	504	19.2	Mus musculus OX=10090	2:Experimental evidence at transcript level	Cytochrome P450 2D11	1	0.999	12	14	14	120	2	2	2	2	1	1	1	1	1	1	0	0	0	0	2	2	2	2	1	1	1	1	1	1	0	0	0	0	10	10	9	11	11	10	11
sp|P24472|GSTA4_MOUSE	P24472	GSTA4_MOUSE	Gsta4	222	27.9	Mus musculus OX=10090	1:Experimental evidence at protein level	Glutathione S-transferase A4	1	0.999	8	29	29	68	2	2	4	2	4	3	4	2	4	2	0	0	0	0	2	2	4	2	4	3	4	2	4	2	0	0	0	0	5	5	6	5	6	6	6
sp|P24527|LKHA4_MOUSE	P24527	LKHA4_MOUSE	Lta4h	611	28.3	Mus musculus OX=10090	1:Experimental evidence at protein level	Leukotriene A-4 hydrolase	1	0.999	14	49	49	49	4	2	4	3	9	11	8	1	2	4	1	0	0	0	4	2	4	3	9	11	8	1	2	4	1	0	0	0	4	2	4	3	9	11	8
sp|P24668|MPRD_MOUSE	P24668	MPRD_MOUSE	M6pr	278	23	Mus musculus OX=10090	1:Experimental evidence at protein level	Cation-dependent mannose-6-phosphate receptor	1	0.999	4	18	18	18	2	2	1	1	4	3	3	0	2	0	0	0	0	0	2	2	1	1	4	3	3	0	2	0	0	0	0	0	2	2	1	1	4	3	3
sp|P24721|ASGR2_MOUSE	P24721	ASGR2_MOUSE	Asgr2	301	9	Mus musculus OX=10090	1:Experimental evidence at protein level	Asialoglycoprotein receptor 2	1	0.999	3	24	24	24	2	2	3	3	2	2	2	2	2	1	1	0	1	1	2	2	3	3	2	2	2	2	2	1	1	0	1	1	2	2	3	3	2	2	2
sp|P25444|RS2_MOUSE	P25444	RS2_MOUSE	Rps2	293	52.2	Mus musculus OX=10090	1:Experimental evidence at protein level	40S ribosomal protein S2	1	0.999	14	109	109	109	6	7	8	9	11	12	13	6	6	8	6	3	6	8	6	7	8	9	11	12	13	6	6	8	6	3	6	8	6	7	8	9	11	12	13
sp|P25688|URIC_MOUSE	P25688	URIC_MOUSE	Uox	303	89.8	Mus musculus OX=10090	1:Experimental evidence at protein level	Uricase	1	0.999	36	338	338	338	27	26	27	25	36	33	30	18	21	19	19	18	19	20	27	26	27	25	36	33	30	18	21	19	19	18	19	20	27	26	27	25	36	33	30
sp|P25911|LYN_MOUSE	P25911	LYN_MOUSE	Lyn	512	13.1	Mus musculus OX=10090	1:Experimental evidence at protein level	Tyrosine-protein kinase Lyn	1	0.999	3	9	9	9	1	0	0	1	3	2	2	0	0	0	0	0	0	0	1	0	0	1	3	2	2	0	0	0	0	0	0	0	1	0	0	1	3	2	2
sp|P26039|TLN1_MOUSE	P26039	TLN1_MOUSE	Tln1	2541	27.4	Mus musculus OX=10090	1:Experimental evidence at protein level	Talin-1	1	0.999	58	283	254	283	19	19	11	16	46	42	44	23	23	28	4	0	5	3	17	17	9	13	43	39	40	20	20	24	4	0	5	3	19	19	11	16	46	42	44
sp|P26262|KLKB1_MOUSE	P26262	KLKB1_MOUSE	Klkb1	638	7.8	Mus musculus OX=10090	1:Experimental evidence at protein level	Plasma kallikrein	1	0.9986	3	5	5	5	0	0	0	0	1	2	2	0	0	0	0	0	0	0	0	0	0	0	1	2	2	0	0	0	0	0	0	0	0	0	0	0	1	2	2
sp|P26350|PTMA_MOUSE	P26350	PTMA_MOUSE	Ptma	111	36	Mus musculus OX=10090	1:Experimental evidence at protein level	Prothymosin alpha	1	0.999	3	17	17	17	1	1	1	1	3	3	3	1	2	1	0	0	0	0	1	1	1	1	3	3	3	1	2	1	0	0	0	0	1	1	1	1	3	3	3
sp|P26369|U2AF2_MOUSE	P26369	U2AF2_MOUSE	U2af2	475	5.7	Mus musculus OX=10090	1:Experimental evidence at protein level	Splicing factor U2AF 65 kDa subunit	1	0.999	3	4	4	4	0	0	0	0	3	1	0	0	0	0	0	0	0	0	0	0	0	0	3	1	0	0	0	0	0	0	0	0	0	0	0	0	3	1	0
sp|P26516|PSMD7_MOUSE	P26516	PSMD7_MOUSE	Psmd7	321	29.9	Mus musculus OX=10090	1:Experimental evidence at protein level	26S proteasome non-ATPase regulatory subunit 7	1	0.999	8	26	26	26	1	1	2	3	4	6	4	2	2	1	0	0	0	0	1	1	2	3	4	6	4	2	2	1	0	0	0	0	1	1	2	3	4	6	4
sp|P26645|MARCS_MOUSE	P26645	MARCS_MOUSE	Marcks	309	42.4	Mus musculus OX=10090	1:Experimental evidence at protein level	Myristoylated alanine-rich C-kinase substrate	1	0.999	7	23	23	23	0	0	0	0	6	7	5	0	2	3	0	0	0	0	0	0	0	0	6	7	5	0	2	3	0	0	0	0	0	0	0	0	6	7	5
sp|P27046|MA2A1_MOUSE	P27046	MA2A1_MOUSE	Man2a1	1150	19.1	Mus musculus OX=10090	1:Experimental evidence at protein level	Alpha-mannosidase 2	1	0.999	16	56	56	56	3	3	4	4	16	11	7	2	2	2	0	0	0	2	3	3	4	4	16	11	7	2	2	2	0	0	0	2	3	3	4	4	16	11	7
sp|P27546|MAP4_MOUSE	P27546	MAP4_MOUSE	Map4	1125	11	Mus musculus OX=10090	1:Experimental evidence at protein level	Microtubule-associated protein 4	1	0.999	8	15	15	15	0	0	0	1	4	6	4	0	0	0	0	0	0	0	0	0	0	1	4	6	4	0	0	0	0	0	0	0	0	0	0	1	4	6	4
sp|P27612|PLAP_MOUSE	P27612	PLAP_MOUSE	Plaa	794	9.7	Mus musculus OX=10090	1:Experimental evidence at protein level	Phospholipase A-2-activating protein	1	0.999	7	20	20	20	3	1	0	1	4	4	5	0	1	1	0	0	0	0	3	1	0	1	4	4	5	0	1	1	0	0	0	0	3	1	0	1	4	4	5
sp|P27659|RL3_MOUSE	P27659	RL3_MOUSE	Rpl3	403	41.2	Mus musculus OX=10090	1:Experimental evidence at protein level	60S ribosomal protein L3	1	0.999	18	124	124	124	12	10	10	9	17	13	12	7	9	9	4	3	4	5	12	10	10	9	17	13	12	7	9	9	4	3	4	5	12	10	10	9	17	13	12
sp|P27786|CP17A_MOUSE	P27786	CP17A_MOUSE	Cyp17a1	507	18.5	Mus musculus OX=10090	1:Experimental evidence at protein level	Steroid 17-alpha-hydroxylase/17,20 lyase	1	0.999	8	23	23	23	4	5	2	0	6	1	2	0	3	0	0	0	0	0	4	5	2	0	6	1	2	0	3	0	0	0	0	0	4	5	2	0	6	1	2
sp|P28063|PSB8_MOUSE	P28063	PSB8_MOUSE	Psmb8	276	23.2	Mus musculus OX=10090	1:Experimental evidence at protein level	Proteasome subunit beta type-8	1	0.999	6	39	39	39	6	1	5	5	6	4	4	4	2	2	0	0	0	0	6	1	5	5	6	4	4	4	2	2	0	0	0	0	6	1	5	5	6	4	4
sp|P28076|PSB9_MOUSE	P28076	PSB9_MOUSE	Psmb9	219	10	Mus musculus OX=10090	1:Experimental evidence at protein level	Proteasome subunit beta type-9	1	0.999	2	13	13	13	1	2	1	1	1	2	2	1	0	1	1	0	0	0	1	2	1	1	1	2	2	1	0	1	1	0	0	0	1	2	1	1	1	2	2
sp|P28230|CXB1_MOUSE	P28230	CXB1_MOUSE	Gjb1	283	9.2	Mus musculus OX=10090	1:Experimental evidence at protein level	Gap junction beta-1 protein	1	0.999	4	15	15	15	1	2	1	1	2	2	2	1	2	1	0	0	0	0	1	2	1	1	2	2	2	1	2	1	0	0	0	0	1	2	1	1	2	2	2
sp|P28352|APEX1_MOUSE	P28352	APEX1_MOUSE	Apex1	317	12.9	Mus musculus OX=10090	1:Experimental evidence at protein level	DNA-(apurinic or apyrimidinic site) endonuclease	1	0.999	3	8	8	8	0	0	0	0	3	2	1	1	1	0	0	0	0	0	0	0	0	0	3	2	1	1	1	0	0	0	0	0	0	0	0	0	3	2	1
sp|P28474|ADHX_MOUSE	P28474	ADHX_MOUSE	Adh5	374	50.3	Mus musculus OX=10090	1:Experimental evidence at protein level	Alcohol dehydrogenase class-3	1	0.999	15	119	97	119	8	10	10	11	14	13	15	6	8	6	4	3	4	7	6	8	9	9	12	11	13	5	6	4	3	3	3	5	8	10	10	11	14	13	15
sp|P28665|MUG1_MOUSE	P28665	MUG1_MOUSE	Mug1	1476	18.3	Mus musculus OX=10090	1:Experimental evidence at protein level	Murinoglobulin-1	1	0.999	25	87	44	87	4	4	5	9	10	10	11	14	7	7	0	1	2	3	2	2	3	4	5	6	7	6	3	4	0	0	1	1	4	4	5	9	10	10	11
sp|P28666|MUG2_MOUSE	P28666	MUG2_MOUSE	Mug2	1451	15.3	Mus musculus OX=10090	1:Experimental evidence at protein level	Murinoglobulin-2	1	0.999	17	12	12	55	0	0	0	0	5	2	5	0	0	0	0	0	0	0	0	0	0	0	5	2	5	0	0	0	0	0	0	0	2	2	2	5	10	6	9
sp|P28667|MRP_MOUSE	P28667	MRP_MOUSE	Marcksl1	200	19	Mus musculus OX=10090	1:Experimental evidence at protein level	MARCKS-related protein	1	0.999	2	6	6	6	0	0	0	0	2	3	1	0	0	0	0	0	0	0	0	0	0	0	2	3	1	0	0	0	0	0	0	0	0	0	0	0	2	3	1
sp|P28843|DPP4_MOUSE	P28843	DPP4_MOUSE	Dpp4	760	28.8	Mus musculus OX=10090	1:Experimental evidence at protein level	Dipeptidyl peptidase 4	1	0.999	20	122	122	122	11	10	9	10	17	14	15	7	7	10	3	3	3	3	11	10	9	10	17	14	15	7	7	10	3	3	3	3	11	10	9	10	17	14	15
sp|P29341|PABP1_MOUSE	P29341	PABP1_MOUSE	Pabpc1	636	36.9	Mus musculus OX=10090	1:Experimental evidence at protein level	Polyadenylate-binding protein 1	1	0.999	24	180	180	180	15	15	15	14	24	18	21	11	11	13	6	4	7	6	15	15	15	14	24	18	21	11	11	13	6	4	7	6	15	15	15	14	24	18	21
sp|P29351|PTN6_MOUSE	P29351	PTN6_MOUSE	Ptpn6	595	15.3	Mus musculus OX=10090	1:Experimental evidence at protein level	Tyrosine-protein phosphatase non-receptor type 6	1	0.999	8	23	23	23	0	0	0	0	8	7	6	0	1	1	0	0	0	0	0	0	0	0	8	7	6	0	1	1	0	0	0	0	0	0	0	0	8	7	6
sp|P29595|NEDD8_MOUSE	P29595	NEDD8_MOUSE	Nedd8	81	30.9	Mus musculus OX=10090	1:Experimental evidence at protein level	NEDD8	1	0.999	2	4	0	4	1	0	0	0	1	0	1	0	1	0	0	0	0	0	0	0	0	0	0	0	0	0	0	0	0	0	0	0	1	0	0	0	1	0	1
sp|P29699|FETUA_MOUSE	P29699	FETUA_MOUSE	Ahsg	345	17.1	Mus musculus OX=10090	1:Experimental evidence at protein level	Alpha-2-HS-glycoprotein	1	0.999	4	30	30	30	2	2	2	2	4	4	4	1	2	2	3	0	0	2	2	2	2	2	4	4	4	1	2	2	3	0	0	2	2	2	2	2	4	4	4
sp|P29758|OAT_MOUSE	P29758	OAT_MOUSE	Oat	439	44.6	Mus musculus OX=10090	1:Experimental evidence at protein level	Ornithine aminotransferase, mitochondrial	1	0.999	20	43	43	43	0	0	0	7	1	11	3	17	1	3	0	0	0	0	0	0	0	7	1	11	3	17	1	3	0	0	0	0	0	0	0	7	1	11	3
sp|P29788|VTNC_MOUSE	P29788	VTNC_MOUSE	Vtn	478	14.6	Mus musculus OX=10090	1:Experimental evidence at protein level	Vitronectin	1	0.999	6	15	15	15	0	0	0	0	4	3	3	0	3	2	0	0	0	0	0	0	0	0	4	3	3	0	3	2	0	0	0	0	0	0	0	0	4	3	3
sp|P30416|FKBP4_MOUSE	P30416	FKBP4_MOUSE	Fkbp4	458	35.8	Mus musculus OX=10090	1:Experimental evidence at protein level	Peptidyl-prolyl cis-trans isomerase FKBP4	1	0.999	17	90	90	90	6	7	6	5	15	12	11	8	8	8	1	0	1	2	6	7	6	5	15	12	11	8	8	8	1	0	1	2	6	7	6	5	15	12	11
sp|P30999|CTND1_MOUSE	P30999	CTND1_MOUSE	Ctnnd1	938	14.9	Mus musculus OX=10090	1:Experimental evidence at protein level	Catenin delta-1	1	0.999	13	59	59	59	2	3	3	3	14	9	10	5	5	5	0	0	0	0	2	3	3	3	14	9	10	5	5	5	0	0	0	0	2	3	3	3	14	9	10
sp|P31230|AIMP1_MOUSE	P31230	AIMP1_MOUSE	Aimp1	310	45.5	Mus musculus OX=10090	1:Experimental evidence at protein level	Aminoacyl tRNA synthase complex-interacting multifunctional protein 1	1	0.999	10	43	43	43	3	3	3	1	9	8	6	4	3	3	0	0	0	0	3	3	3	1	9	8	6	4	3	3	0	0	0	0	3	3	3	1	9	8	6
sp|P31786|ACBP_MOUSE	P31786	ACBP_MOUSE	Dbi	87	54	Mus musculus OX=10090	1:Experimental evidence at protein level	Acyl-CoA-binding protein	1	0.999	4	30	30	30	2	3	3	2	3	3	1	3	3	3	1	1	1	1	2	3	3	2	3	3	1	3	3	3	1	1	1	1	2	3	3	2	3	3	1
sp|P31938|MP2K1_MOUSE	P31938	MP2K1_MOUSE	Map2k1	393	22.4	Mus musculus OX=10090	1:Experimental evidence at protein level	Dual specificity mitogen-activated protein kinase kinase 1	1	0.999	5	13	9	13	1	1	1	4	1	1	2	1	1	0	0	0	0	0	1	1	1	2	1	1	2	0	0	0	0	0	0	0	1	1	1	4	1	1	2
sp|P32020|SCP2_MOUSE	P32020	SCP2_MOUSE	Scp2	547	54.1	Mus musculus OX=10090	1:Experimental evidence at protein level	Sterol carrier protein 2	1	0.999	28	288	288	288	24	23	22	24	27	33	30	19	20	17	13	12	12	12	24	23	22	24	27	33	30	19	20	17	13	12	12	12	24	23	22	24	27	33	30
sp|P32067|LA_MOUSE	P32067	LA_MOUSE	Ssb	415	17.8	Mus musculus OX=10090	1:Experimental evidence at protein level	Lupus La protein homolog	1	0.999	7	17	17	17	0	2	1	1	3	4	4	1	0	1	0	0	0	0	0	2	1	1	3	4	4	1	0	1	0	0	0	0	0	2	1	1	3	4	4
sp|P33267|CP2F2_MOUSE	P33267	CP2F2_MOUSE	Cyp2f2	491	60.3	Mus musculus OX=10090	1:Experimental evidence at protein level	Cytochrome P450 2F2	1	0.999	29	238	236	238	23	25	23	5	27	23	24	0	23	17	17	0	14	17	23	25	23	5	26	22	24	0	23	17	17	0	14	17	23	25	23	5	27	23	24
sp|P33622|APOC3_MOUSE	P33622	APOC3_MOUSE	Apoc3	99	19.2	Mus musculus OX=10090	1:Experimental evidence at protein level	Apolipoprotein C-III	1	0.999	1	11	11	11	1	1	1	1	1	1	1	2	1	1	0	0	0	0	1	1	1	1	1	1	1	2	1	1	0	0	0	0	1	1	1	1	1	1	1
sp|P34884|MIF_MOUSE	P34884	MIF_MOUSE	Mif	115	41.7	Mus musculus OX=10090	1:Experimental evidence at protein level	Macrophage migration inhibitory factor	1	0.999	4	30	30	30	1	2	4	3	3	2	2	4	4	3	0	0	1	1	1	2	4	3	3	2	2	4	4	3	0	0	1	1	1	2	4	3	3	2	2
sp|P34914|HYES_MOUSE	P34914	HYES_MOUSE	Ephx2	554	64.6	Mus musculus OX=10090	1:Experimental evidence at protein level	Bifunctional epoxide hydrolase 2	1	0.999	26	249	249	249	16	17	17	19	25	26	22	25	21	22	12	10	8	9	16	17	17	19	25	26	22	25	21	22	12	10	8	9	16	17	17	19	25	26	22
sp|P34927|ASGR1_MOUSE	P34927	ASGR1_MOUSE	Asgr1	284	26.4	Mus musculus OX=10090	1:Experimental evidence at protein level	Asialoglycoprotein receptor 1	1	0.999	8	80	80	80	7	8	6	8	8	9	8	4	5	4	3	3	3	4	7	8	6	8	8	9	8	4	5	4	3	3	3	4	7	8	6	8	8	9	8
sp|P34928|APOC1_MOUSE	P34928	APOC1_MOUSE	Apoc1	88	18.2	Mus musculus OX=10090	1:Experimental evidence at protein level	Apolipoprotein C-I	1	0.999	2	9	9	9	0	1	1	1	0	1	1	2	1	1	0	0	0	0	0	1	1	1	0	1	1	2	1	1	0	0	0	0	0	1	1	1	0	1	1
sp|P35278|RAB5C_MOUSE	P35278	RAB5C_MOUSE	Rab5c	216	33.3	Mus musculus OX=10090	1:Experimental evidence at protein level	Ras-related protein Rab-5C	1	0.999	6	45	22	45	3	3	3	5	6	5	5	5	4	6	0	0	0	0	1	2	2	2	3	2	2	3	2	3	0	0	0	0	3	3	3	5	6	5	5
sp|P35293|RAB18_MOUSE	P35293	RAB18_MOUSE	Rab18	206	31.1	Mus musculus OX=10090	1:Experimental evidence at protein level	Ras-related protein Rab-18	1	0.999	6	27	27	27	2	2	1	2	5	5	5	2	2	1	0	0	0	0	2	2	1	2	5	5	5	2	2	1	0	0	0	0	2	2	1	2	5	5	5
sp|P35441|TSP1_MOUSE	P35441	TSP1_MOUSE	Thbs1	1170	3.4	Mus musculus OX=10090	1:Experimental evidence at protein level	Thrombospondin-1	1	0.999	3	4	4	4	0	0	0	0	2	0	1	0	0	1	0	0	0	0	0	0	0	0	2	0	1	0	0	1	0	0	0	0	0	0	0	0	2	0	1
sp|P35486|ODPA_MOUSE	P35486	ODPA_MOUSE	Pdha1	390	25.9	Mus musculus OX=10090	1:Experimental evidence at protein level	Pyruvate dehydrogenase E1 component subunit alpha, somatic form, mitochondrial	1	0.999	13	87	87	87	9	7	6	9	11	9	9	7	5	3	2	3	4	3	9	7	6	9	11	9	9	7	5	3	2	3	4	3	9	7	6	9	11	9	9
sp|P35492|HUTH_MOUSE	P35492	HUTH_MOUSE	Hal	657	51.6	Mus musculus OX=10090	1:Experimental evidence at protein level	Histidine ammonia-lyase	1	0.999	27	275	275	275	27	27	25	11	35	23	27	0	25	22	18	1	15	19	27	27	25	11	35	23	27	0	25	22	18	1	15	19	27	27	25	11	35	23	27
sp|P35505|FAAA_MOUSE	P35505	FAAA_MOUSE	Fah	419	70.4	Mus musculus OX=10090	1:Experimental evidence at protein level	Fumarylacetoacetase	1	0.999	20	181	181	181	11	12	11	11	20	22	18	13	13	13	11	9	7	10	11	12	11	11	20	22	18	13	13	13	11	9	7	10	11	12	11	11	20	22	18
sp|P35527|K1C9_HUMAN	P35527	K1C9_HUMAN	KRT9	623	7.1	Homo sapiens	1:Experimental evidence at protein level	Keratin, type I cytoskeletal 9	1	0.999	3	9	9	23	0	0	0	1	0	0	0	1	1	1	2	1	1	1	0	0	0	1	0	0	0	1	1	1	2	1	1	1	1	1	1	2	1	1	1
sp|P35564|CALX_MOUSE	P35564	CALX_MOUSE	Canx	591	41.5	Mus musculus OX=10090	1:Experimental evidence at protein level	Calnexin	1	0.999	30	234	234	234	16	16	18	18	30	24	20	20	17	24	9	5	8	9	16	16	18	18	30	24	20	20	17	24	9	5	8	9	16	16	18	18	30	24	20
sp|P35585|AP1M1_MOUSE	P35585	AP1M1_MOUSE	Ap1m1	423	15.6	Mus musculus OX=10090	1:Experimental evidence at protein level	AP-1 complex subunit mu-1	1	0.999	6	16	16	16	1	0	0	1	4	3	5	2	0	0	0	0	0	0	1	0	0	1	4	3	5	2	0	0	0	0	0	0	1	0	0	1	4	3	5
sp|P35922|FMR1_MOUSE	P35922	FMR1_MOUSE	Fmr1	614	5.2	Mus musculus OX=10090	1:Experimental evidence at protein level	Synaptic functional regulator FMR1	1	0.999	3	4	4	10	0	0	0	0	1	2	1	0	0	0	0	0	0	0	0	0	0	0	1	2	1	0	0	0	0	0	0	0	1	1	1	0	1	2	2
sp|P35979|RL12_MOUSE	P35979	RL12_MOUSE	Rpl12	165	63.6	Mus musculus OX=10090	1:Experimental evidence at protein level	60S ribosomal protein L12	1	0.999	7	55	55	55	4	4	4	4	7	7	6	4	4	3	2	1	2	3	4	4	4	4	7	7	6	4	4	3	2	1	2	3	4	4	4	4	7	7	6
sp|P35980|RL18_MOUSE	P35980	RL18_MOUSE	Rpl18	188	41.5	Mus musculus OX=10090	1:Experimental evidence at protein level	60S ribosomal protein L18	1	0.999	8	76	76	76	6	6	7	7	5	5	6	5	5	7	4	4	5	4	6	6	7	7	5	5	6	5	5	7	4	4	5	4	6	6	7	7	5	5	6
sp|P36536|SAR1A_MOUSE	P36536	SAR1A_MOUSE	Sar1a	198	15.7	Mus musculus OX=10090	1:Experimental evidence at protein level	GTP-binding protein SAR1a	1	0.997	5	4	4	23	0	0	0	0	0	1	0	2	1	0	0	0	0	0	0	0	0	0	0	1	0	2	1	0	0	0	0	0	2	1	1	2	2	3	2
sp|P36552|HEM6_MOUSE	P36552	HEM6_MOUSE	Cpox	443	26.2	Mus musculus OX=10090	1:Experimental evidence at protein level	Oxygen-dependent coproporphyrinogen-III oxidase, mitochondrial	1	0.999	12	73	73	73	5	3	4	7	11	13	10	7	4	6	1	1	0	1	5	3	4	7	11	13	10	7	4	6	1	1	0	1	5	3	4	7	11	13	10
sp|P36993|PPM1B_MOUSE	P36993	PPM1B_MOUSE	Ppm1b	390	11.8	Mus musculus OX=10090	1:Experimental evidence at protein level	Protein phosphatase 1B	1	0.999	4	7	4	7	0	0	0	0	2	1	3	1	0	0	0	0	0	0	0	0	0	0	1	1	2	0	0	0	0	0	0	0	0	0	0	0	2	1	3
sp|P37040|NCPR_MOUSE	P37040	NCPR_MOUSE	Por	678	44.1	Mus musculus OX=10090	1:Experimental evidence at protein level	NADPH--cytochrome P450 reductase	1	0.999	31	260	260	260	18	20	17	26	22	28	28	20	19	17	10	13	11	11	18	20	17	26	22	28	28	20	19	17	10	13	11	11	18	20	17	26	22	28	28
sp|P38647|GRP75_MOUSE	P38647	GRP75_MOUSE	Hspa9	679	57.4	Mus musculus OX=10090	1:Experimental evidence at protein level	Stress-70 protein, mitochondrial	1	0.999	44	488	475	488	36	37	33	36	56	55	52	34	32	37	20	18	21	21	35	36	32	35	56	54	51	33	31	36	19	17	20	20	36	37	33	36	56	55	52
sp|P39061|COIA1_MOUSE	P39061	COIA1_MOUSE	Col18a1	1774	2.6	Mus musculus OX=10090	1:Experimental evidence at protein level	Collagen alpha-1(XVIII) chain	1	0.999	2	8	8	8	0	0	0	1	1	1	2	1	1	1	0	0	0	0	0	0	0	1	1	1	2	1	1	1	0	0	0	0	0	0	0	1	1	1	2
sp|P39447|ZO1_MOUSE	P39447	ZO1_MOUSE	Tjp1	1745	9.9	Mus musculus OX=10090	1:Experimental evidence at protein level	Tight junction protein ZO-1	1	0.999	12	28	28	28	0	0	0	0	9	9	6	0	3	1	0	0	0	0	0	0	0	0	9	9	6	0	3	1	0	0	0	0	0	0	0	0	9	9	6
sp|P40237|CD82_MOUSE	P40237	CD82_MOUSE	Cd82	266	13.2	Mus musculus OX=10090	1:Experimental evidence at protein level	CD82 antigen	1	0.999	3	4	4	4	0	0	0	0	2	1	1	0	0	0	0	0	0	0	0	0	0	0	2	1	1	0	0	0	0	0	0	0	0	0	0	0	2	1	1
sp|P40336|VP26A_MOUSE	P40336	VP26A_MOUSE	Vps26a	327	25.7	Mus musculus OX=10090	1:Experimental evidence at protein level	Vacuolar protein sorting-associated protein 26A	1	0.999	6	11	11	11	0	0	0	0	3	2	2	1	1	2	0	0	0	0	0	0	0	0	3	2	2	1	1	2	0	0	0	0	0	0	0	0	3	2	2
sp|P40630|TFAM_MOUSE	P40630	TFAM_MOUSE	Tfam	243	31.7	Mus musculus OX=10090	1:Experimental evidence at protein level	Transcription factor A, mitochondrial	1	0.999	8	17	17	17	2	1	0	1	5	2	4	0	1	1	0	0	0	0	2	1	0	1	5	2	4	0	1	1	0	0	0	0	2	1	0	1	5	2	4
sp|P40936|INMT_MOUSE	P40936	INMT_MOUSE	Inmt	264	38.3	Mus musculus OX=10090	1:Experimental evidence at protein level	Indolethylamine N-methyltransferase	1	0.999	10	100	100	100	8	8	8	8	10	9	9	6	7	5	5	6	6	5	8	8	8	8	10	9	9	6	7	5	5	6	6	5	8	8	8	8	10	9	9
sp|P41105|RL28_MOUSE	P41105	RL28_MOUSE	Rpl28	137	57.7	Mus musculus OX=10090	1:Experimental evidence at protein level	60S ribosomal protein L28	1	0.999	12	82	82	82	7	7	7	8	9	8	9	6	4	4	2	1	5	5	7	7	7	8	9	8	9	6	4	4	2	1	5	5	7	7	7	8	9	8	9
sp|P41216|ACSL1_MOUSE	P41216	ACSL1_MOUSE	Acsl1	699	65.5	Mus musculus OX=10090	1:Experimental evidence at protein level	Long-chain-fatty-acid--CoA ligase 1	1	0.999	43	396	360	396	32	31	32	36	44	42	44	26	27	25	15	15	15	12	29	28	30	33	41	39	41	23	24	23	13	13	13	10	32	31	32	36	44	42	44
sp|P41317|MBL2_MOUSE	P41317	MBL2_MOUSE	Mbl2	244	27.9	Mus musculus OX=10090	1:Experimental evidence at protein level	Mannose-binding protein C	1	0.999	6	41	40	41	4	3	3	3	4	4	4	5	4	4	2	0	1	0	4	3	3	3	4	4	4	4	4	4	2	0	1	0	4	3	3	3	4	4	4
sp|P42125|ECI1_MOUSE	P42125	ECI1_MOUSE	Eci1	289	49.1	Mus musculus OX=10090	1:Experimental evidence at protein level	Enoyl-CoA delta isomerase 1, mitochondrial	1	0.999	15	141	141	141	11	10	10	13	18	16	16	10	10	9	4	5	5	4	11	10	10	13	18	16	16	10	10	9	4	5	5	4	11	10	10	13	18	16	16
sp|P42208|SEPT2_MOUSE	P42208	SEPT2_MOUSE	Septin2	361	17.5	Mus musculus OX=10090	1:Experimental evidence at protein level	Septin-2	1	0.999	6	21	21	21	0	1	1	1	6	6	4	1	0	1	0	0	0	0	0	1	1	1	6	6	4	1	0	1	0	0	0	0	0	1	1	1	6	6	4
sp|P42225|STAT1_MOUSE	P42225	STAT1_MOUSE	Stat1	749	4.9	Mus musculus OX=10090	1:Experimental evidence at protein level	Signal transducer and activator of transcription 1	1	0.999	2	2	2	2	0	0	0	0	0	2	0	0	0	0	0	0	0	0	0	0	0	0	0	2	0	0	0	0	0	0	0	0	0	0	0	0	0	2	0
sp|P42227|STAT3_MOUSE	P42227	STAT3_MOUSE	Stat3	770	21.3	Mus musculus OX=10090	1:Experimental evidence at protein level	Signal transducer and activator of transcription 3	1	0.999	12	51	51	51	3	4	3	4	10	10	9	1	2	4	1	0	0	0	3	4	3	4	10	10	9	1	2	4	1	0	0	0	3	4	3	4	10	10	9
sp|P42230|STA5A_MOUSE	P42230	STA5A_MOUSE	Stat5a	793	4.8	Mus musculus OX=10090	1:Experimental evidence at protein level	Signal transducer and activator of transcription 5A	1	0.999	3	9	0	9	0	1	0	1	3	2	2	0	0	0	0	0	0	0	0	0	0	0	0	0	0	0	0	0	0	0	0	0	0	1	0	1	3	2	2
sp|P42567|EPS15_MOUSE	P42567	EPS15_MOUSE	Eps15	897	8.5	Mus musculus OX=10090	1:Experimental evidence at protein level	Epidermal growth factor receptor substrate 15	1	0.999	6	13	13	13	0	0	0	0	5	3	4	0	1	0	0	0	0	0	0	0	0	0	5	3	4	0	1	0	0	0	0	0	0	0	0	0	5	3	4
sp|P42925|PXMP2_MOUSE	P42925	PXMP2_MOUSE	Pxmp2	194	16.5	Mus musculus OX=10090	1:Experimental evidence at protein level	Peroxisomal membrane protein 2	1	0.999	2	7	7	7	0	0	0	0	2	2	2	0	1	0	0	0	0	0	0	0	0	0	2	2	2	0	1	0	0	0	0	0	0	0	0	0	2	2	2
sp|P42932|TCPQ_MOUSE	P42932	TCPQ_MOUSE	Cct8	548	46.5	Mus musculus OX=10090	1:Experimental evidence at protein level	T-complex protein 1 subunit theta	1	0.999	27	211	211	211	18	17	14	16	23	23	22	16	16	18	5	6	8	9	18	17	14	16	23	23	22	16	16	18	5	6	8	9	18	17	14	16	23	23	22
sp|P43006|EAA2_MOUSE	P43006	EAA2_MOUSE	Slc1a2	572	7.5	Mus musculus OX=10090	1:Experimental evidence at protein level	Excitatory amino acid transporter 2	1	0.9988	3	3	3	3	0	0	0	0	0	0	0	3	0	0	0	0	0	0	0	0	0	0	0	0	0	3	0	0	0	0	0	0	0	0	0	0	0	0	0
sp|P43024|CX6A1_MOUSE	P43024	CX6A1_MOUSE	Cox6a1	111	61.3	Mus musculus OX=10090	1:Experimental evidence at protein level	Cytochrome c oxidase subunit 6A1, mitochondrial	1	0.999	4	46	46	46	4	4	5	5	6	6	4	1	3	2	1	1	1	3	4	4	5	5	6	6	4	1	3	2	1	1	1	3	4	4	5	5	6	6	4
sp|P43883|PLIN2_MOUSE	P43883	PLIN2_MOUSE	Plin2	425	23.8	Mus musculus OX=10090	1:Experimental evidence at protein level	Perilipin-2	1	0.999	8	55	55	55	5	4	2	5	7	11	8	3	5	5	0	0	0	0	5	4	2	5	7	11	8	3	5	5	0	0	0	0	5	4	2	5	7	11	8
sp|P45591|COF2_MOUSE	P45591	COF2_MOUSE	Cfl2	166	35.5	Mus musculus OX=10090	1:Experimental evidence at protein level	Cofilin-2	1	0.999	7	26	26	53	3	2	2	3	1	2	2	3	3	3	0	0	1	1	3	2	2	3	1	2	2	3	3	3	0	0	1	1	5	4	4	7	4	5	4
sp|P45700|MA1A1_MOUSE	P45700	MA1A1_MOUSE	Man1a1	655	7	Mus musculus OX=10090	1:Experimental evidence at protein level	Mannosyl-oligosaccharide 1,2-alpha-mannosidase IA	1	0.999	4	18	18	18	3	1	2	2	1	4	3	0	2	0	0	0	0	0	3	1	2	2	1	4	3	0	2	0	0	0	0	0	3	1	2	2	1	4	3
sp|P45952|ACADM_MOUSE	P45952	ACADM_MOUSE	Acadm	421	51.8	Mus musculus OX=10090	1:Experimental evidence at protein level	Medium-chain specific acyl-CoA dehydrogenase, mitochondrial	1	0.999	23	243	243	243	19	19	19	22	21	24	23	18	17	18	13	11	9	10	19	19	19	22	21	24	23	18	17	18	13	11	9	10	19	19	19	22	21	24	23
sp|P46061|RAGP1_MOUSE	P46061	RAGP1_MOUSE	Rangap1	589	8.1	Mus musculus OX=10090	1:Experimental evidence at protein level	Ran GTPase-activating protein 1	1	0.999	3	10	10	10	1	0	0	1	2	1	2	1	2	0	0	0	0	0	1	0	0	1	2	1	2	1	2	0	0	0	0	0	1	0	0	1	2	1	2
sp|P46460|NSF_MOUSE	P46460	NSF_MOUSE	Nsf	744	7.9	Mus musculus OX=10090	1:Experimental evidence at protein level	Vesicle-fusing ATPase	1	0.999	5	15	15	15	0	1	0	0	3	4	3	1	1	1	0	0	1	0	0	1	0	0	3	4	3	1	1	1	0	0	1	0	0	1	0	0	3	4	3
sp|P46467|VPS4B_MOUSE	P46467	VPS4B_MOUSE	Vps4b	444	9	Mus musculus OX=10090	1:Experimental evidence at protein level	Vacuolar protein sorting-associated protein 4B	1	0.999	3	8	8	8	0	0	0	0	2	2	1	0	2	1	0	0	0	0	0	0	0	0	2	2	1	0	2	1	0	0	0	0	0	0	0	0	2	2	1
sp|P46471|PRS7_MOUSE	P46471	PRS7_MOUSE	Psmc2	433	48	Mus musculus OX=10090	1:Experimental evidence at protein level	26S proteasome regulatory subunit 7	1	0.999	20	103	103	103	9	8	7	10	14	13	10	8	9	10	1	0	2	2	9	8	7	10	14	13	10	8	9	10	1	0	2	2	9	8	7	10	14	13	10
sp|P46656|ADX_MOUSE	P46656	ADX_MOUSE	Fdx1	188	29.3	Mus musculus OX=10090	1:Experimental evidence at protein level	Adrenodoxin, mitochondrial	1	0.999	7	41	41	41	3	5	3	4	5	4	4	2	2	2	2	1	2	2	3	5	3	4	5	4	4	2	2	2	2	1	2	2	3	5	3	4	5	4	4
sp|P46735|MYO1B_MOUSE	P46735	MYO1B_MOUSE	Myo1b	1107	11.1	Mus musculus OX=10090	1:Experimental evidence at protein level	Unconventional myosin-Ib	1	0.999	11	38	35	38	2	2	1	5	7	7	6	4	2	1	0	0	0	1	2	2	1	5	7	6	5	3	2	1	0	0	0	1	2	2	1	5	7	7	6
sp|P46935|NEDD4_MOUSE	P46935	NEDD4_MOUSE	Nedd4	887	2.6	Mus musculus OX=10090	1:Experimental evidence at protein level	E3 ubiquitin-protein ligase NEDD4	1	0.999	2	7	7	7	0	1	0	0	2	2	2	0	0	0	0	0	0	0	0	1	0	0	2	2	2	0	0	0	0	0	0	0	0	1	0	0	2	2	2
sp|P46978|STT3A_MOUSE	P46978	STT3A_MOUSE	Stt3a	705	18.6	Mus musculus OX=10090	1:Experimental evidence at protein level	Dolichyl-diphosphooligosaccharide--protein glycosyltransferase subunit STT3A	1	0.999	14	118	116	118	9	9	9	9	14	12	11	7	9	8	7	3	5	6	9	9	9	9	13	12	10	7	9	8	7	3	5	6	9	9	9	9	14	12	11
sp|P47199|QOR_MOUSE	P47199	QOR_MOUSE	Cryz	331	54.1	Mus musculus OX=10090	1:Experimental evidence at protein level	Quinone oxidoreductase	1	0.999	12	70	70	70	6	6	5	5	9	10	8	7	4	4	2	2	1	1	6	6	5	5	9	10	8	7	4	4	2	2	1	1	6	6	5	5	9	10	8
sp|P47740|AL3A2_MOUSE	P47740	AL3A2_MOUSE	Aldh3a2	484	49.8	Mus musculus OX=10090	1:Experimental evidence at protein level	Aldehyde dehydrogenase family 3 member A2	1	0.999	22	180	166	180	10	11	11	17	15	23	22	16	12	16	2	12	9	4	9	10	10	17	13	22	21	15	10	15	2	11	8	3	10	11	11	17	15	23	22
sp|P47753|CAZA1_MOUSE	P47753	CAZA1_MOUSE	Capza1	286	36.4	Mus musculus OX=10090	1:Experimental evidence at protein level	F-actin-capping protein subunit alpha-1	1	0.999	8	25	25	45	3	2	2	2	6	3	3	1	2	1	0	0	0	0	3	2	2	2	6	3	3	1	2	1	0	0	0	0	5	4	4	4	8	4	5
sp|P47754|CAZA2_MOUSE	P47754	CAZA2_MOUSE	Capza2	286	57	Mus musculus OX=10090	1:Experimental evidence at protein level	F-actin-capping protein subunit alpha-2	1	0.999	11	94	74	94	7	6	6	9	10	10	9	8	10	8	4	1	3	3	5	4	4	7	8	9	7	7	9	7	3	0	2	2	7	6	6	9	10	10	9
sp|P47757|CAPZB_MOUSE	P47757	CAPZB_MOUSE	Capzb	277	27.4	Mus musculus OX=10090	1:Experimental evidence at protein level	F-actin-capping protein subunit beta	1	0.999	8	47	47	47	4	3	4	3	8	6	4	4	2	5	2	0	1	1	4	3	4	3	8	6	4	4	2	5	2	0	1	1	4	3	4	3	8	6	4
sp|P47758|SRPRB_MOUSE	P47758	SRPRB_MOUSE	Srprb	269	28.3	Mus musculus OX=10090	1:Experimental evidence at protein level	Signal recognition particle receptor subunit beta	1	0.999	6	29	29	29	1	1	2	4	5	6	4	2	2	2	0	0	0	0	1	1	2	4	5	6	4	2	2	2	0	0	0	0	1	1	2	4	5	6	4
sp|P47791|GSHR_MOUSE	P47791	GSHR_MOUSE	Gsr	500	17	Mus musculus OX=10090	1:Experimental evidence at protein level	Glutathione reductase, mitochondrial	1	0.999	6	14	14	14	0	0	0	0	4	5	5	0	0	0	0	0	0	0	0	0	0	0	4	5	5	0	0	0	0	0	0	0	0	0	0	0	4	5	5
sp|P47802|MTX1_MOUSE	P47802	MTX1_MOUSE	Mtx1	317	32.2	Mus musculus OX=10090	1:Experimental evidence at protein level	Metaxin-1	1	0.999	9	31	31	31	2	1	1	3	7	5	5	3	2	2	0	0	0	0	2	1	1	3	7	5	5	3	2	2	0	0	0	0	2	1	1	3	7	5	5
sp|P47911|RL6_MOUSE	P47911	RL6_MOUSE	Rpl6	296	51.4	Mus musculus OX=10090	1:Experimental evidence at protein level	60S ribosomal protein L6	1	0.999	20	166	166	166	14	11	13	14	17	18	17	13	10	11	7	6	7	8	14	11	13	14	17	18	17	13	10	11	7	6	7	8	14	11	13	14	17	18	17
sp|P47941|CRKL_MOUSE	P47941	CRKL_MOUSE	Crkl	303	15.8	Mus musculus OX=10090	1:Experimental evidence at protein level	Crk-like protein	1	0.999	2	5	5	5	0	0	0	0	1	2	2	0	0	0	0	0	0	0	0	0	0	0	1	2	2	0	0	0	0	0	0	0	0	0	0	0	1	2	2
sp|P47955|RLA1_MOUSE	P47955	RLA1_MOUSE	Rplp1	114	42.1	Mus musculus OX=10090	1:Experimental evidence at protein level	60S acidic ribosomal protein P1	1	0.999	3	15	15	15	1	1	1	1	3	2	2	1	1	1	1	0	0	0	1	1	1	1	3	2	2	1	1	1	1	0	0	0	1	1	1	1	3	2	2
sp|P47962|RL5_MOUSE	P47962	RL5_MOUSE	Rpl5	297	34.7	Mus musculus OX=10090	1:Experimental evidence at protein level	60S ribosomal protein L5	1	0.999	13	136	136	136	12	12	11	11	16	18	16	9	8	9	4	2	3	5	12	12	11	11	16	18	16	9	8	9	4	2	3	5	12	12	11	11	16	18	16
sp|P47963|RL13_MOUSE	P47963	RL13_MOUSE	Rpl13	211	46.4	Mus musculus OX=10090	1:Experimental evidence at protein level	60S ribosomal protein L13	1	0.999	14	150	150	150	11	11	12	13	14	12	11	12	10	10	8	7	9	10	11	11	12	13	14	12	11	12	10	10	8	7	9	10	11	11	12	13	14	12	11
sp|P48024|EIF1_MOUSE	P48024	EIF1_MOUSE	Eif1	113	33.6	Mus musculus OX=10090	1:Experimental evidence at protein level	Eukaryotic translation initiation factor 1	1	0.999	2	4	0	4	0	0	0	0	1	0	1	0	1	1	0	0	0	0	0	0	0	0	0	0	0	0	0	0	0	0	0	0	0	0	0	0	1	0	1
sp|P48678|LMNA_MOUSE	P48678	LMNA_MOUSE	Lmna	665	56.2	Mus musculus OX=10090	1:Experimental evidence at protein level	Prelamin-A/C	1	0.999	41	291	273	291	25	23	21	25	31	29	29	21	24	20	8	8	10	17	23	22	20	24	29	27	27	20	23	19	7	7	9	16	25	23	21	25	31	29	29
sp|P48722|HS74L_MOUSE	P48722	HS74L_MOUSE	Hspa4l	838	10.7	Mus musculus OX=10090	1:Experimental evidence at protein level	Heat shock 70 kDa protein 4L	1	0.9987	6	7	7	8	0	0	0	0	1	2	3	0	1	0	0	0	0	0	0	0	0	0	1	2	3	0	1	0	0	0	0	0	0	0	0	0	1	3	3
sp|P48771|CX7A2_MOUSE	P48771	CX7A2_MOUSE	Cox7a2	83	60.2	Mus musculus OX=10090	1:Experimental evidence at protein level	Cytochrome c oxidase subunit 7A2, mitochondrial	1	0.999	4	39	39	39	3	3	2	2	6	7	4	2	3	3	1	1	1	1	3	3	2	2	6	7	4	2	3	3	1	1	1	1	3	3	2	2	6	7	4
sp|P48776|T23O_MOUSE	P48776	T23O_MOUSE	Tdo2	406	21.4	Mus musculus OX=10090	1:Experimental evidence at protein level	Tryptophan 2,3-dioxygenase	1	0.999	7	22	22	22	1	1	2	2	6	4	3	1	1	1	0	0	0	0	1	1	2	2	6	4	3	1	1	1	0	0	0	0	1	1	2	2	6	4	3
sp|P49312|ROA1_MOUSE	P49312	ROA1_MOUSE	Hnrnpa1	320	27.5	Mus musculus OX=10090	1:Experimental evidence at protein level	Heterogeneous nuclear ribonucleoprotein A1	1	0.999	11	30	30	41	2	1	3	2	6	7	9	0	0	0	0	0	0	0	2	1	3	2	6	7	9	0	0	0	0	0	0	0	3	2	4	3	7	9	9
sp|P49429|HPPD_MOUSE	P49429	HPPD_MOUSE	Hpd	393	66.7	Mus musculus OX=10090	1:Experimental evidence at protein level	4-hydroxyphenylpyruvate dioxygenase	1	0.999	30	366	366	366	27	28	30	31	34	34	40	25	22	26	14	18	17	20	27	28	30	31	34	34	40	25	22	26	14	18	17	20	27	28	30	31	34	34	40
sp|P49710|HCLS1_MOUSE	P49710	HCLS1_MOUSE	Hcls1	486	5.1	Mus musculus OX=10090	1:Experimental evidence at protein level	Hematopoietic lineage cell-specific protein	1	0.999	2	3	3	3	0	0	0	0	1	1	1	0	0	0	0	0	0	0	0	0	0	0	1	1	1	0	0	0	0	0	0	0	0	0	0	0	1	1	1
sp|P49722|PSA2_MOUSE	P49722	PSA2_MOUSE	Psma2	234	49.1	Mus musculus OX=10090	1:Experimental evidence at protein level	Proteasome subunit alpha type-2	1	0.999	9	59	59	59	3	4	5	4	6	6	8	7	5	4	1	3	1	2	3	4	5	4	6	6	8	7	5	4	1	3	1	2	3	4	5	4	6	6	8
sp|P50136|ODBA_MOUSE	P50136	ODBA_MOUSE	Bckdha	442	54.3	Mus musculus OX=10090	1:Experimental evidence at protein level	2-oxoisovalerate dehydrogenase subunit alpha, mitochondrial	1	0.999	19	160	160	160	13	12	12	12	18	17	14	12	14	14	6	6	5	5	13	12	12	12	18	17	14	12	14	14	6	6	5	5	13	12	12	12	18	17	14
sp|P50172|DHI1_MOUSE	P50172	DHI1_MOUSE	Hsd11b1	292	58.2	Mus musculus OX=10090	1:Experimental evidence at protein level	Corticosteroid 11-beta-dehydrogenase isozyme 1	1	0.999	21	202	202	202	19	18	15	17	28	20	23	8	14	13	7	7	6	7	19	18	15	17	28	20	23	8	14	13	7	7	6	7	19	18	15	17	28	20	23
sp|P50247|SAHH_MOUSE	P50247	SAHH_MOUSE	Ahcy	432	63.4	Mus musculus OX=10090	1:Experimental evidence at protein level	Adenosylhomocysteinase	1	0.999	31	288	288	288	21	20	19	19	38	30	29	20	26	25	10	8	11	12	21	20	19	19	38	30	29	20	26	25	10	8	11	12	21	20	19	19	38	30	29
sp|P50285|FMO1_MOUSE	P50285	FMO1_MOUSE	Fmo1	532	52.8	Mus musculus OX=10090	1:Experimental evidence at protein level	Dimethylaniline monooxygenase [N-oxide-forming] 1	1	0.999	24	190	190	190	12	12	12	20	21	20	21	19	13	15	5	6	8	6	12	12	12	20	21	20	21	19	13	15	5	6	8	6	12	12	12	20	21	20	21
sp|P50295|ARY2_MOUSE	P50295	ARY2_MOUSE	Nat2	290	15.9	Mus musculus OX=10090	1:Experimental evidence at protein level	Arylamine N-acetyltransferase 2	1	0.999	4	9	9	9	1	1	0	2	2	3	0	0	0	0	0	0	0	0	1	1	0	2	2	3	0	0	0	0	0	0	0	0	1	1	0	2	2	3	0
sp|P50396|GDIA_MOUSE	P50396	GDIA_MOUSE	Gdi1	447	30.4	Mus musculus OX=10090	1:Experimental evidence at protein level	Rab GDP dissociation inhibitor alpha	1	0.999	9	6	6	39	0	0	0	0	3	0	1	0	1	1	0	0	0	0	0	0	0	0	3	0	1	0	1	1	0	0	0	0	2	2	3	3	7	3	4
sp|P50427|STS_MOUSE	P50427	STS_MOUSE	Sts	624	10.1	Mus musculus OX=10090	1:Experimental evidence at protein level	Steryl-sulfatase	1	0.999	4	11	11	11	0	1	1	2	1	2	1	1	1	1	0	0	0	0	0	1	1	2	1	2	1	1	1	1	0	0	0	0	0	1	1	2	1	2	1
sp|P50431|GLYC_MOUSE	P50431	GLYC_MOUSE	Shmt1	478	51.7	Mus musculus OX=10090	1:Experimental evidence at protein level	Serine hydroxymethyltransferase, cytosolic	1	0.999	22	135	135	138	10	13	10	10	18	21	15	8	9	8	3	2	3	5	10	13	10	10	18	21	15	8	9	8	3	2	3	5	10	13	10	10	18	21	15
sp|P50516|VATA_MOUSE	P50516	VATA_MOUSE	Atp6v1a	617	25.9	Mus musculus OX=10090	1:Experimental evidence at protein level	V-type proton ATPase catalytic subunit A	1	0.999	13	71	71	71	6	4	6	6	10	11	9	7	2	3	0	0	4	3	6	4	6	6	10	11	9	7	2	3	0	0	4	3	6	4	6	6	10	11	9
sp|P50544|ACADV_MOUSE	P50544	ACADV_MOUSE	Acadvl	656	69.4	Mus musculus OX=10090	1:Experimental evidence at protein level	Very long-chain specific acyl-CoA dehydrogenase, mitochondrial	1	0.999	38	355	355	355	26	27	27	28	38	30	34	20	25	28	18	17	16	21	26	27	27	28	38	30	34	20	25	28	18	17	16	21	26	27	27	28	38	30	34
sp|P50580|PA2G4_MOUSE	P50580	PA2G4_MOUSE	Pa2g4	394	44.7	Mus musculus OX=10090	1:Experimental evidence at protein level	Proliferation-associated protein 2G4	1	0.999	16	134	134	134	9	9	8	8	16	16	18	12	12	10	6	3	3	4	9	9	8	8	16	16	18	12	12	10	6	3	3	4	9	9	8	8	16	16	18
sp|P50637|TSPO_MOUSE	P50637	TSPO_MOUSE	Tspo	169	30.8	Mus musculus OX=10090	1:Experimental evidence at protein level	Translocator protein	1	0.999	3	16	16	16	1	0	0	1	6	4	4	0	0	0	0	0	0	0	1	0	0	1	6	4	4	0	0	0	0	0	0	0	1	0	0	1	6	4	4
sp|P51125|ICAL_MOUSE	P51125	ICAL_MOUSE	Cast	788	4.9	Mus musculus OX=10090	1:Experimental evidence at protein level	Calpastatin	1	0.999	3	6	6	6	0	0	0	0	2	2	2	0	0	0	0	0	0	0	0	0	0	0	2	2	2	0	0	0	0	0	0	0	0	0	0	0	2	2	2
sp|P51150|RAB7A_MOUSE	P51150	RAB7A_MOUSE	Rab7a	207	65.2	Mus musculus OX=10090	1:Experimental evidence at protein level	Ras-related protein Rab-7a	1	0.999	13	59	54	59	1	4	5	3	9	9	9	5	6	4	2	0	1	1	1	4	5	3	8	8	9	4	5	3	2	0	1	1	1	4	5	3	9	9	9
sp|P51174|ACADL_MOUSE	P51174	ACADL_MOUSE	Acadl	430	47.9	Mus musculus OX=10090	1:Experimental evidence at protein level	Long-chain specific acyl-CoA dehydrogenase, mitochondrial	1	0.999	19	181	181	181	14	11	12	14	21	21	18	15	16	16	7	3	7	6	14	11	12	14	21	21	18	15	16	16	7	3	7	6	14	11	12	14	21	21	18
sp|P51410|RL9_MOUSE	P51410	RL9_MOUSE	Rpl9	192	54.2	Mus musculus OX=10090	1:Experimental evidence at protein level	60S ribosomal protein L9	1	0.999	8	33	33	33	2	2	1	2	5	7	6	1	2	1	1	1	1	1	2	2	1	2	5	7	6	1	2	1	1	1	1	1	2	2	1	2	5	7	6
sp|P51658|DHB2_MOUSE	P51658	DHB2_MOUSE	Hsd17b2	381	30.7	Mus musculus OX=10090	1:Experimental evidence at protein level	Estradiol 17-beta-dehydrogenase 2	1	0.999	12	75	75	75	4	6	6	8	7	11	7	8	9	8	0	0	0	1	4	6	6	8	7	11	7	8	9	8	0	0	0	1	4	6	6	8	7	11	7
sp|P51660|DHB4_MOUSE	P51660	DHB4_MOUSE	Hsd17b4	735	44.1	Mus musculus OX=10090	1:Experimental evidence at protein level	Peroxisomal multifunctional enzyme type 2	1	0.999	27	294	294	294	23	25	21	25	30	28	29	21	15	19	14	15	14	15	23	25	21	25	30	28	29	21	15	19	14	15	14	15	23	25	21	25	30	28	29
sp|P51859|HDGF_MOUSE	P51859	HDGF_MOUSE	Hdgf	237	41.4	Mus musculus OX=10090	1:Experimental evidence at protein level	Hepatoma-derived growth factor	1	0.999	7	18	18	18	0	0	1	0	4	3	1	3	2	4	0	0	0	0	0	0	1	0	4	3	1	3	2	4	0	0	0	0	0	0	1	0	4	3	1
sp|P51863|VA0D1_MOUSE	P51863	VA0D1_MOUSE	Atp6v0d1	351	9.1	Mus musculus OX=10090	1:Experimental evidence at protein level	V-type proton ATPase subunit d 1	1	0.999	3	19	19	19	1	1	1	1	2	3	2	2	3	3	0	0	0	0	1	1	1	1	2	3	2	2	3	3	0	0	0	0	1	1	1	1	2	3	2
sp|P52196|THTR_MOUSE	P52196	THTR_MOUSE	Tst	297	44.8	Mus musculus OX=10090	1:Experimental evidence at protein level	Thiosulfate sulfurtransferase	1	0.999	13	160	156	160	9	9	9	11	14	14	14	15	17	16	7	9	8	8	9	9	9	11	13	13	12	15	17	16	7	9	8	8	9	9	9	11	14	14	14
sp|P52430|PON1_MOUSE	P52430	PON1_MOUSE	Pon1	355	30.1	Mus musculus OX=10090	1:Experimental evidence at protein level	Serum paraoxonase/arylesterase 1	1	0.999	9	66	66	66	4	4	4	4	6	10	9	8	4	5	2	2	2	2	4	4	4	4	6	10	9	8	4	5	2	2	2	2	4	4	4	4	6	10	9
sp|P52479|UBP10_MOUSE	P52479	UBP10_MOUSE	Usp10	792	4.2	Mus musculus OX=10090	1:Experimental evidence at protein level	Ubiquitin carboxyl-terminal hydrolase 10	1	0.999	2	5	5	5	0	0	1	0	1	1	2	0	0	0	0	0	0	0	0	0	1	0	1	1	2	0	0	0	0	0	0	0	0	0	1	0	1	1	2
sp|P52480|KPYM_MOUSE	P52480	KPYM_MOUSE	Pkm	531	17.9	Mus musculus OX=10090	1:Experimental evidence at protein level	Pyruvate kinase PKM	1	0.999	8	31	31	45	1	1	1	1	6	5	3	4	4	4	0	0	1	0	1	1	1	1	6	5	3	4	4	4	0	0	1	0	2	2	2	2	7	6	4
sp|P52503|NDUS6_MOUSE	P52503	NDUS6_MOUSE	Ndufs6	116	38.8	Mus musculus OX=10090	1:Experimental evidence at protein level	NADH dehydrogenase [ubiquinone] iron-sulfur protein 6, mitochondrial	1	0.999	3	13	13	13	1	1	1	1	3	2	1	1	1	1	0	0	0	0	1	1	1	1	3	2	1	1	1	1	0	0	0	0	1	1	1	1	3	2	1
sp|P52760|RIDA_MOUSE	P52760	RIDA_MOUSE	Rida	135	76.3	Mus musculus OX=10090	1:Experimental evidence at protein level	2-iminobutanoate/2-iminopropanoate deaminase	1	0.999	7	70	70	70	5	6	6	2	6	7	8	4	8	5	4	2	3	4	5	6	6	2	6	7	8	4	8	5	4	2	3	4	5	6	6	2	6	7	8
sp|P52792|HXK4_MOUSE	P52792	HXK4_MOUSE	Gck	465	18.5	Mus musculus OX=10090	1:Experimental evidence at protein level	Hexokinase-4	1	0.999	8	24	24	24	1	1	1	2	4	6	5	0	2	2	0	0	0	0	1	1	1	2	4	6	5	0	2	2	0	0	0	0	1	1	1	2	4	6	5
sp|P52825|CPT2_MOUSE	P52825	CPT2_MOUSE	Cpt2	658	56.4	Mus musculus OX=10090	1:Experimental evidence at protein level	Carnitine O-palmitoyltransferase 2, mitochondrial	1	0.999	34	253	253	253	22	21	19	19	27	27	26	17	20	18	12	8	8	9	22	21	19	19	27	27	26	17	20	18	12	8	8	9	22	21	19	19	27	27	26
sp|P52840|ST1A1_MOUSE	P52840	ST1A1_MOUSE	Sult1a1	291	63.9	Mus musculus OX=10090	1:Experimental evidence at protein level	Sulfotransferase 1A1	1	0.999	16	125	114	125	10	8	10	6	17	13	14	7	9	10	4	5	4	8	9	7	8	6	15	12	13	7	9	9	4	5	3	7	10	8	10	6	17	13	14
sp|P53026|RL10A_MOUSE	P53026	RL10A_MOUSE	Rpl10a	217	48.8	Mus musculus OX=10090	1:Experimental evidence at protein level	60S ribosomal protein L10a	1	0.999	12	84	84	84	5	5	6	8	11	10	10	7	5	5	3	3	3	3	5	5	6	8	11	10	10	7	5	5	3	3	3	3	5	5	6	8	11	10	10
sp|P53395|ODB2_MOUSE	P53395	ODB2_MOUSE	Dbt	482	47.1	Mus musculus OX=10090	1:Experimental evidence at protein level	Lipoamide acyltransferase component of branched-chain alpha-keto acid dehydrogenase complex, mitochondrial	1	0.999	23	211	211	211	17	20	17	17	21	21	22	14	16	16	7	5	8	10	17	20	17	17	21	21	22	14	16	16	7	5	8	10	17	20	17	17	21	21	22
sp|P53657|KPYR_MOUSE	P53657	KPYR_MOUSE	Pklr	574	44.4	Mus musculus OX=10090	1:Experimental evidence at protein level	Pyruvate kinase PKLR	1	0.999	24	208	194	208	17	18	19	15	23	22	22	13	17	13	9	2	8	10	16	17	18	14	22	21	21	12	16	12	8	1	7	9	17	18	19	15	23	22	22
sp|P53798|FDFT_MOUSE	P53798	FDFT_MOUSE	Fdft1	416	5.5	Mus musculus OX=10090	1:Experimental evidence at protein level	Squalene synthase	1	0.999	2	6	6	6	0	0	0	0	3	2	1	0	0	0	0	0	0	0	0	0	0	0	3	2	1	0	0	0	0	0	0	0	0	0	0	0	3	2	1
sp|P53808|PPCT_MOUSE	P53808	PPCT_MOUSE	Pctp	214	16.8	Mus musculus OX=10090	1:Experimental evidence at protein level	Phosphatidylcholine transfer protein	1	0.999	5	17	17	17	1	2	1	2	4	3	1	1	1	1	0	0	0	0	1	2	1	2	4	3	1	1	1	1	0	0	0	0	1	2	1	2	4	3	1
sp|P53811|PIPNB_MOUSE	P53811	PIPNB_MOUSE	Pitpnb	271	18.5	Mus musculus OX=10090	1:Experimental evidence at protein level	Phosphatidylinositol transfer protein beta isoform	1	0.999	5	13	13	13	0	0	0	1	3	4	3	0	2	0	0	0	0	0	0	0	0	1	3	4	3	0	2	0	0	0	0	0	0	0	0	1	3	4	3
sp|P53986|MOT1_MOUSE	P53986	MOT1_MOUSE	Slc16a1	493	11.6	Mus musculus OX=10090	1:Experimental evidence at protein level	Monocarboxylate transporter 1	1	0.999	5	30	30	30	2	2	2	2	4	7	4	3	2	2	0	0	0	0	2	2	2	2	4	7	4	3	2	2	0	0	0	0	2	2	2	2	4	7	4
sp|P54071|IDHP_MOUSE	P54071	IDHP_MOUSE	Idh2	452	47.6	Mus musculus OX=10090	1:Experimental evidence at protein level	Isocitrate dehydrogenase [NADP], mitochondrial	1	0.999	20	155	155	169	10	10	9	10	16	16	20	12	11	12	8	7	8	6	10	10	9	10	16	16	20	12	11	12	8	7	8	6	11	11	10	11	17	17	21
sp|P54116|STOM_MOUSE	P54116	STOM_MOUSE	Stom	284	15.5	Mus musculus OX=10090	1:Experimental evidence at protein level	Stomatin	1	0.999	4	11	11	11	1	0	0	1	1	2	2	1	0	2	0	0	1	0	1	0	0	1	1	2	2	1	0	2	0	0	1	0	1	0	0	1	1	2	2
sp|P54728|RD23B_MOUSE	P54728	RD23B_MOUSE	Rad23b	416	25.5	Mus musculus OX=10090	1:Experimental evidence at protein level	UV excision repair protein RAD23 homolog B	1	0.999	11	52	35	52	3	4	5	4	7	6	6	6	6	5	0	0	0	0	2	2	3	2	5	5	5	4	4	3	0	0	0	0	3	4	5	4	7	6	6
sp|P54775|PRS6B_MOUSE	P54775	PRS6B_MOUSE	Psmc4	418	40.4	Mus musculus OX=10090	1:Experimental evidence at protein level	26S proteasome regulatory subunit 6B	1	0.999	17	74	74	74	4	4	5	5	11	15	14	5	5	3	0	1	1	1	4	4	5	5	11	15	14	5	5	3	0	1	1	1	4	4	5	5	11	15	14
sp|P54822|PUR8_MOUSE	P54822	PUR8_MOUSE	Adsl	484	14	Mus musculus OX=10090	1:Experimental evidence at protein level	Adenylosuccinate lyase	1	0.999	4	18	18	18	2	1	1	1	3	4	4	1	0	1	0	0	0	0	2	1	1	1	3	4	4	1	0	1	0	0	0	0	2	1	1	1	3	4	4
sp|P54823|DDX6_MOUSE	P54823	DDX6_MOUSE	Ddx6	483	12.8	Mus musculus OX=10090	1:Experimental evidence at protein level	Probable ATP-dependent RNA helicase DDX6	1	0.999	3	9	9	9	0	1	0	0	3	2	3	0	0	0	0	0	0	0	0	1	0	0	3	2	3	0	0	0	0	0	0	0	0	1	0	0	3	2	3
sp|P54869|HMCS2_MOUSE	P54869	HMCS2_MOUSE	Hmgcs2	508	58.9	Mus musculus OX=10090	1:Experimental evidence at protein level	Hydroxymethylglutaryl-CoA synthase, mitochondrial	1	0.999	32	489	470	489	35	36	39	36	46	45	46	31	35	38	26	23	25	28	34	35	37	35	45	43	45	29	33	36	25	22	24	27	35	36	39	36	46	45	46
sp|P55096|ABCD3_MOUSE	P55096	ABCD3_MOUSE	Abcd3	659	43.4	Mus musculus OX=10090	1:Experimental evidence at protein level	ATP-binding cassette sub-family D member 3	1	0.999	30	221	221	221	16	15	18	24	27	24	25	19	16	19	6	4	4	4	16	15	18	24	27	24	25	19	16	19	6	4	4	4	16	15	18	24	27	24	25
sp|P55264|ADK_MOUSE	P55264	ADK_MOUSE	Adk	361	47.9	Mus musculus OX=10090	1:Experimental evidence at protein level	Adenosine kinase	1	0.999	15	93	93	93	7	6	5	4	13	12	12	7	9	8	3	2	2	3	7	6	5	4	13	12	12	7	9	8	3	2	2	3	7	6	5	4	13	12	12
sp|P55292|DSC2_MOUSE	P55292	DSC2_MOUSE	Dsc2	902	7.1	Mus musculus OX=10090	1:Experimental evidence at protein level	Desmocollin-2	1	0.999	4	6	6	6	0	0	0	0	1	2	3	0	0	0	0	0	0	0	0	0	0	0	1	2	3	0	0	0	0	0	0	0	0	0	0	0	1	2	3
sp|P55937|GOGA3_MOUSE	P55937	GOGA3_MOUSE	Golga3	1487	7.9	Mus musculus OX=10090	1:Experimental evidence at protein level	Golgin subfamily A member 3	1	0.999	5	7	7	7	0	0	0	0	2	1	4	0	0	0	0	0	0	0	0	0	0	0	2	1	4	0	0	0	0	0	0	0	0	0	0	0	2	1	4
sp|P56135|ATPK_MOUSE	P56135	ATPK_MOUSE	Atp5mf	88	46.6	Mus musculus OX=10090	1:Experimental evidence at protein level	ATP synthase subunit f, mitochondrial	1	0.999	5	36	36	36	2	2	3	3	3	3	4	3	3	3	2	2	1	2	2	2	3	3	3	3	4	3	3	3	2	2	1	2	2	2	3	3	3	3	4
sp|P56213|ALR_MOUSE	P56213	ALR_MOUSE	Gfer	198	30.3	Mus musculus OX=10090	1:Experimental evidence at protein level	FAD-linked sulfhydryl oxidase ALR	1	0.999	5	17	17	17	1	0	0	1	4	3	5	1	1	1	0	0	0	0	1	0	0	1	4	3	5	1	1	1	0	0	0	0	1	0	0	1	4	3	5
sp|P56379|ATP68_MOUSE	P56379	ATP68_MOUSE	Atp5mj	58	29.3	Mus musculus OX=10090	1:Experimental evidence at protein level	ATP synthase subunit ATP5MJ, mitochondrial	1	0.999	2	13	13	13	1	1	1	2	1	1	1	1	2	2	0	0	0	0	1	1	1	2	1	1	1	1	2	2	0	0	0	0	1	1	1	2	1	1	1
sp|P56382|ATP5E_MOUSE	P56382	ATP5E_MOUSE	Atp5f1e	52	30.8	Mus musculus OX=10090	1:Experimental evidence at protein level	ATP synthase subunit epsilon, mitochondrial	1	0.999	2	17	17	17	2	2	1	1	1	1	1	1	1	1	1	1	1	2	2	2	1	1	1	1	1	1	1	1	1	1	1	2	2	2	1	1	1	1	1
sp|P56391|CX6B1_MOUSE	P56391	CX6B1_MOUSE	Cox6b1	86	54.7	Mus musculus OX=10090	1:Experimental evidence at protein level	Cytochrome c oxidase subunit 6B1	1	0.999	6	28	28	28	0	0	2	1	7	4	4	3	5	2	0	0	0	0	0	0	2	1	7	4	4	3	5	2	0	0	0	0	0	0	2	1	7	4	4
sp|P56393|COX7B_MOUSE	P56393	COX7B_MOUSE	Cox7b	80	10	Mus musculus OX=10090	3:Protein inferred from homology	Cytochrome c oxidase subunit 7B, mitochondrial	1	0.999	2	9	9	9	1	1	0	1	2	2	1	0	1	0	0	0	0	0	1	1	0	1	2	2	1	0	1	0	0	0	0	0	1	1	0	1	2	2	1
sp|P56399|UBP5_MOUSE	P56399	UBP5_MOUSE	Usp5	858	24.1	Mus musculus OX=10090	1:Experimental evidence at protein level	Ubiquitin carboxyl-terminal hydrolase 5	1	0.999	15	58	58	58	3	3	3	5	9	14	7	6	3	4	0	0	0	1	3	3	3	5	9	14	7	6	3	4	0	0	0	1	3	3	3	5	9	14	7
sp|P56480|ATPB_MOUSE	P56480	ATPB_MOUSE	Atp5f1b	529	76.9	Mus musculus OX=10090	1:Experimental evidence at protein level	ATP synthase subunit beta, mitochondrial	1	0.999	33	710	710	710	50	49	47	48	77	85	78	38	57	42	39	31	34	35	50	49	47	48	77	85	78	38	57	42	39	31	34	35	50	49	47	48	77	85	78
sp|P56593|CP2AC_MOUSE	P56593	CP2AC_MOUSE	Cyp2a12	492	62.2	Mus musculus OX=10090	1:Experimental evidence at protein level	Cytochrome P450 2A12	1	0.999	28	180	156	180	14	15	15	12	20	15	13	10	19	15	9	4	9	10	12	13	13	10	19	13	11	9	17	14	7	3	7	8	14	15	15	12	20	15	13
sp|P57759|ERP29_MOUSE	P57759	ERP29_MOUSE	Erp29	262	24.4	Mus musculus OX=10090	1:Experimental evidence at protein level	Endoplasmic reticulum resident protein 29	1	0.999	6	17	17	17	1	1	1	1	3	3	4	0	1	2	0	0	0	0	1	1	1	1	3	3	4	0	1	2	0	0	0	0	1	1	1	1	3	3	4
sp|P57776|EF1D_MOUSE	P57776	EF1D_MOUSE	Eef1d	281	50.5	Mus musculus OX=10090	1:Experimental evidence at protein level	Elongation factor 1-delta	1	0.999	12	154	154	154	9	12	11	11	14	15	16	13	14	16	6	5	5	7	9	12	11	11	14	15	16	13	14	16	6	5	5	7	9	12	11	11	14	15	16
sp|P58021|TM9S2_MOUSE	P58021	TM9S2_MOUSE	Tm9sf2	662	5.4	Mus musculus OX=10090	1:Experimental evidence at protein level	Transmembrane 9 superfamily member 2	1	0.999	3	14	14	14	1	1	1	1	1	3	1	1	2	2	0	0	0	0	1	1	1	1	1	3	1	1	2	2	0	0	0	0	1	1	1	1	1	3	1
sp|P58059|RT21_MOUSE	P58059	RT21_MOUSE	Mrps21	87	31	Mus musculus OX=10090	1:Experimental evidence at protein level	28S ribosomal protein S21, mitochondrial	1	0.999	2	5	5	5	0	0	0	0	2	2	1	0	0	0	0	0	0	0	0	0	0	0	2	2	1	0	0	0	0	0	0	0	0	0	0	0	2	2	1
sp|P58252|EF2_MOUSE	P58252	EF2_MOUSE	Eef2	858	53.6	Mus musculus OX=10090	1:Experimental evidence at protein level	Elongation factor 2	1	0.999	46	465	451	465	34	37	35	35	51	47	42	32	42	34	20	18	20	18	33	36	34	34	50	46	41	31	41	33	19	17	19	17	34	37	35	35	51	47	42
sp|P58281|OPA1_MOUSE	P58281	OPA1_MOUSE	Opa1	960	22	Mus musculus OX=10090	1:Experimental evidence at protein level	Dynamin-like 120 kDa protein, mitochondrial	1	0.999	16	76	76	76	6	6	4	6	11	10	13	5	7	7	0	0	1	0	6	6	4	6	11	10	13	5	7	7	0	0	1	0	6	6	4	6	11	10	13
sp|P58710|GGLO_MOUSE	P58710	GGLO_MOUSE	Gulo	440	41.4	Mus musculus OX=10090	1:Experimental evidence at protein level	L-gulonolactone oxidase	1	0.999	17	56	56	56	1	1	0	12	1	14	6	11	2	5	0	3	0	0	1	1	0	12	1	14	6	11	2	5	0	3	0	0	1	1	0	12	1	14	6
sp|P58735|S26A1_MOUSE	P58735	S26A1_MOUSE	Slc26a1	704	12.4	Mus musculus OX=10090	1:Experimental evidence at protein level	Sulfate anion transporter 1	1	0.999	6	25	25	25	3	2	2	1	4	3	4	2	1	3	0	0	0	0	3	2	2	1	4	3	4	2	1	3	0	0	0	0	3	2	2	1	4	3	4
sp|P58771|TPM1_MOUSE	P58771	TPM1_MOUSE	Tpm1	284	22.9	Mus musculus OX=10090	1:Experimental evidence at protein level	Tropomyosin alpha-1 chain	1	0.999	11	10	10	75	1	2	1	1	1	1	1	0	1	1	0	0	0	0	1	2	1	1	1	1	1	0	1	1	0	0	0	0	6	8	6	8	9	8	9
sp|P58871|TB182_MOUSE	P58871	TB182_MOUSE	Tnks1bp1	1720	7	Mus musculus OX=10090	1:Experimental evidence at protein level	182 kDa tankyrase-1-binding protein	1	0.999	10	21	21	21	1	1	0	0	6	6	5	0	1	1	0	0	0	0	1	1	0	0	6	6	5	0	1	1	0	0	0	0	1	1	0	0	6	6	5
sp|P59017|B2L13_MOUSE	P59017	B2L13_MOUSE	Bcl2l13	434	18.7	Mus musculus OX=10090	1:Experimental evidence at protein level	Bcl-2-like protein 13	1	0.999	7	37	37	37	3	2	1	3	6	6	6	3	2	2	1	0	1	1	3	2	1	3	6	6	6	3	2	2	1	0	1	1	3	2	1	3	6	6	6
sp|P59242|CING_MOUSE	P59242	CING_MOUSE	Cgn	1191	16.2	Mus musculus OX=10090	1:Experimental evidence at protein level	Cingulin	1	0.999	16	47	47	47	2	2	0	1	13	10	10	2	4	3	0	0	0	0	2	2	0	1	13	10	10	2	4	3	0	0	0	0	2	2	0	1	13	10	10
sp|P59325|IF5_MOUSE	P59325	IF5_MOUSE	Eif5	429	18.2	Mus musculus OX=10090	1:Experimental evidence at protein level	Eukaryotic translation initiation factor 5	1	0.999	7	23	23	23	2	1	1	1	1	5	3	3	3	3	0	0	0	0	2	1	1	1	1	5	3	3	3	3	0	0	0	0	2	1	1	1	1	5	3
sp|P59999|ARPC4_MOUSE	P59999	ARPC4_MOUSE	Arpc4	168	45.2	Mus musculus OX=10090	1:Experimental evidence at protein level	Actin-related protein 2/3 complex subunit 4	1	0.999	5	53	53	53	5	5	4	4	5	5	5	4	4	4	2	1	3	2	5	5	4	4	5	5	5	4	4	4	2	1	3	2	5	5	4	4	5	5	5
sp|P60122|RUVB1_MOUSE	P60122	RUVB1_MOUSE	Ruvbl1	456	9.2	Mus musculus OX=10090	1:Experimental evidence at protein level	RuvB-like 1	1	0.999	3	11	11	11	1	1	1	1	2	3	2	0	0	0	0	0	0	0	1	1	1	1	2	3	2	0	0	0	0	0	0	0	1	1	1	1	2	3	2
sp|P60229|EIF3E_MOUSE	P60229	EIF3E_MOUSE	Eif3e	445	24.9	Mus musculus OX=10090	1:Experimental evidence at protein level	Eukaryotic translation initiation factor 3 subunit E	1	0.999	9	30	30	30	1	2	1	2	5	7	4	2	3	3	0	0	0	0	1	2	1	2	5	7	4	2	3	3	0	0	0	0	1	2	1	2	5	7	4
sp|P60670|NPL4_MOUSE	P60670	NPL4_MOUSE	Nploc4	608	6.2	Mus musculus OX=10090	1:Experimental evidence at protein level	Nuclear protein localization protein 4 homolog	1	0.999	2	10	10	10	0	1	1	1	2	1	1	1	1	1	0	0	0	0	0	1	1	1	2	1	1	1	1	1	0	0	0	0	0	1	1	1	2	1	1
sp|P60843|IF4A1_MOUSE	P60843	IF4A1_MOUSE	Eif4a1	406	57.9	Mus musculus OX=10090	1:Experimental evidence at protein level	Eukaryotic initiation factor 4A-I	1	0.999	26	195	86	195	17	15	15	15	21	19	18	16	15	13	8	6	9	8	7	6	7	7	11	11	7	5	8	6	4	1	3	3	17	15	15	15	21	19	18
sp|P60867|RS20_MOUSE	P60867	RS20_MOUSE	Rps20	119	29.4	Mus musculus OX=10090	1:Experimental evidence at protein level	40S ribosomal protein S20	1	0.999	5	35	35	35	3	4	3	2	5	4	5	1	1	1	1	1	2	2	3	4	3	2	5	4	5	1	1	1	1	1	2	2	3	4	3	2	5	4	5
sp|P61021|RAB5B_MOUSE	P61021	RAB5B_MOUSE	Rab5b	215	27	Mus musculus OX=10090	1:Experimental evidence at protein level	Ras-related protein Rab-5B	1	0.999	5	8	8	31	1	0	0	1	1	2	2	0	1	0	0	0	0	0	1	0	0	1	1	2	2	0	1	0	0	0	0	0	3	1	1	4	4	5	5
sp|P61022|CHP1_MOUSE	P61022	CHP1_MOUSE	Chp1	195	12.3	Mus musculus OX=10090	1:Experimental evidence at protein level	Calcineurin B homologous protein 1	1	0.999	3	13	13	13	1	0	2	2	2	2	1	1	1	1	0	0	0	0	1	0	2	2	2	2	1	1	1	1	0	0	0	0	1	0	2	2	2	2	1
sp|P61082|UBC12_MOUSE	P61082	UBC12_MOUSE	Ube2m	183	21.9	Mus musculus OX=10090	1:Experimental evidence at protein level	NEDD8-conjugating enzyme Ubc12	1	0.999	3	9	9	9	0	1	0	1	2	0	2	1	1	1	0	0	0	0	0	1	0	1	2	0	2	1	1	1	0	0	0	0	0	1	0	1	2	0	2
sp|P61087|UBE2K_MOUSE	P61087	UBE2K_MOUSE	Ube2k	200	31	Mus musculus OX=10090	1:Experimental evidence at protein level	Ubiquitin-conjugating enzyme E2 K	1	0.999	5	11	11	11	1	0	0	0	2	2	3	0	1	2	0	0	0	0	1	0	0	0	2	2	3	0	1	2	0	0	0	0	1	0	0	0	2	2	3
sp|P61161|ARP2_MOUSE	P61161	ARP2_MOUSE	Actr2	394	28.9	Mus musculus OX=10090	1:Experimental evidence at protein level	Actin-related protein 2	1	0.999	10	43	43	43	1	4	2	3	10	6	8	2	3	4	0	0	0	0	1	4	2	3	10	6	8	2	3	4	0	0	0	0	1	4	2	3	10	6	8
sp|P61164|ACTZ_MOUSE	P61164	ACTZ_MOUSE	Actr1a	376	25.8	Mus musculus OX=10090	1:Experimental evidence at protein level	Alpha-centractin	1	0.999	8	19	7	19	1	1	1	2	3	6	3	0	1	1	0	0	0	0	0	0	0	0	1	4	2	0	0	0	0	0	0	0	1	1	1	2	3	6	3
sp|P61202|CSN2_MOUSE	P61202	CSN2_MOUSE	Cops2	443	14	Mus musculus OX=10090	1:Experimental evidence at protein level	COP9 signalosome complex subunit 2	1	0.999	6	14	14	14	0	1	0	1	3	4	3	2	0	0	0	0	0	0	0	1	0	1	3	4	3	2	0	0	0	0	0	0	0	1	0	1	3	4	3
sp|P61211|ARL1_MOUSE	P61211	ARL1_MOUSE	Arl1	181	27.1	Mus musculus OX=10090	1:Experimental evidence at protein level	ADP-ribosylation factor-like protein 1	1	0.999	3	8	8	8	0	0	0	1	2	2	1	1	1	0	0	0	0	0	0	0	0	1	2	2	1	1	1	0	0	0	0	0	0	0	0	1	2	2	1
sp|P61222|ABCE1_MOUSE	P61222	ABCE1_MOUSE	Abce1	599	12	Mus musculus OX=10090	1:Experimental evidence at protein level	ATP-binding cassette sub-family E member 1	1	0.999	8	36	36	36	2	2	2	1	4	6	5	4	5	5	0	0	0	0	2	2	2	1	4	6	5	4	5	5	0	0	0	0	2	2	2	1	4	6	5
sp|P61255|RL26_MOUSE	P61255	RL26_MOUSE	Rpl26	145	48.3	Mus musculus OX=10090	1:Experimental evidence at protein level	60S ribosomal protein L26	1	0.999	9	82	79	82	6	7	6	6	9	9	10	3	6	4	4	4	4	4	6	7	6	6	8	8	9	3	6	4	4	4	4	4	6	7	6	6	9	9	10
sp|P61327|MGN_MOUSE	P61327	MGN_MOUSE	Magoh	146	41.1	Mus musculus OX=10090	2:Experimental evidence at transcript level	Protein mago nashi homolog	1	0.999	3	5	0	5	0	0	0	0	2	2	1	0	0	0	0	0	0	0	0	0	0	0	0	0	0	0	0	0	0	0	0	0	0	0	0	0	2	2	1
sp|P61358|RL27_MOUSE	P61358	RL27_MOUSE	Rpl27	136	45.6	Mus musculus OX=10090	1:Experimental evidence at protein level	60S ribosomal protein L27	1	0.999	7	58	58	58	6	4	4	6	7	5	6	4	5	5	1	2	2	1	6	4	4	6	7	5	6	4	5	5	1	2	2	1	6	4	4	6	7	5	6
sp|P61458|PHS_MOUSE	P61458	PHS_MOUSE	Pcbd1	104	64.4	Mus musculus OX=10090	1:Experimental evidence at protein level	Pterin-4-alpha-carbinolamine dehydratase	1	0.999	7	47	35	47	4	3	4	3	6	6	5	6	4	4	0	0	1	1	3	2	3	2	5	5	4	5	3	3	0	0	0	0	4	3	4	3	6	6	5
sp|P61514|RL37A_MOUSE	P61514	RL37A_MOUSE	Rpl37a	92	43.5	Mus musculus OX=10090	1:Experimental evidence at protein level	60S ribosomal protein L37a	1	0.999	4	12	12	12	1	1	1	0	3	2	2	0	0	2	0	0	0	0	1	1	1	0	3	2	2	0	0	2	0	0	0	0	1	1	1	0	3	2	2
sp|P61804|DAD1_MOUSE	P61804	DAD1_MOUSE	Dad1	113	28.3	Mus musculus OX=10090	1:Experimental evidence at protein level	Dolichyl-diphosphooligosaccharide--protein glycosyltransferase subunit DAD1	1	0.999	3	28	28	28	3	3	3	3	2	1	5	1	2	2	1	0	1	1	3	3	3	3	2	1	5	1	2	2	1	0	1	1	3	3	3	3	2	1	5
sp|P61922|GABT_MOUSE	P61922	GABT_MOUSE	Abat	500	49.8	Mus musculus OX=10090	1:Experimental evidence at protein level	4-aminobutyrate aminotransferase, mitochondrial	1	0.999	19	101	101	101	5	6	7	3	17	16	14	9	11	9	1	0	1	2	5	6	7	3	17	16	14	9	11	9	1	0	1	2	5	6	7	3	17	16	14
sp|P61924|COPZ1_MOUSE	P61924	COPZ1_MOUSE	Copz1	177	30.5	Mus musculus OX=10090	1:Experimental evidence at protein level	Coatomer subunit zeta-1	1	0.999	3	16	16	16	0	0	0	0	3	5	4	1	1	2	0	0	0	0	0	0	0	0	3	5	4	1	1	2	0	0	0	0	0	0	0	0	3	5	4
sp|P61979|HNRPK_MOUSE	P61979	HNRPK_MOUSE	Hnrnpk	463	40.6	Mus musculus OX=10090	1:Experimental evidence at protein level	Heterogeneous nuclear ribonucleoprotein K	1	0.999	18	183	183	183	12	15	12	12	22	20	20	15	13	19	7	6	4	6	12	15	12	12	22	20	20	15	13	19	7	6	4	6	12	15	12	12	22	20	20
sp|P61982|1433G_MOUSE	P61982	1433G_MOUSE	Ywhag	247	53.4	Mus musculus OX=10090	1:Experimental evidence at protein level	14-3-3 protein gamma	1	0.999	15	111	94	152	8	8	9	9	13	12	12	7	7	8	6	4	4	4	8	8	8	7	9	8	8	6	7	7	6	4	4	4	11	11	12	12	17	15	15
sp|P62075|TIM13_MOUSE	P62075	TIM13_MOUSE	Timm13	95	65.3	Mus musculus OX=10090	1:Experimental evidence at protein level	Mitochondrial import inner membrane translocase subunit Tim13	1	0.999	5	31	31	31	2	2	2	2	5	5	3	1	2	3	1	1	1	1	2	2	2	2	5	5	3	1	2	3	1	1	1	1	2	2	2	2	5	5	3
sp|P62077|TIM8B_MOUSE	P62077	TIM8B_MOUSE	Timm8b	83	37.3	Mus musculus OX=10090	1:Experimental evidence at protein level	Mitochondrial import inner membrane translocase subunit Tim8 B	1	0.999	3	15	15	15	1	1	0	1	1	1	1	2	3	4	0	0	0	0	1	1	0	1	1	1	1	2	3	4	0	0	0	0	1	1	0	1	1	1	1
sp|P62082|RS7_MOUSE	P62082	RS7_MOUSE	Rps7	194	60.3	Mus musculus OX=10090	2:Experimental evidence at transcript level	40S ribosomal protein S7	1	0.999	11	88	88	88	7	7	7	6	9	9	7	7	7	8	3	3	4	4	7	7	7	6	9	9	7	7	7	8	3	3	4	4	7	7	7	6	9	9	7
sp|P62192|PRS4_MOUSE	P62192	PRS4_MOUSE	Psmc1	440	38.4	Mus musculus OX=10090	1:Experimental evidence at protein level	26S proteasome regulatory subunit 4	1	0.999	15	85	85	85	4	6	4	6	13	13	14	7	7	7	0	0	1	3	4	6	4	6	13	13	14	7	7	7	0	0	1	3	4	6	4	6	13	13	14
sp|P62196|PRS8_MOUSE	P62196	PRS8_MOUSE	Psmc5	406	34.5	Mus musculus OX=10090	1:Experimental evidence at protein level	26S proteasome regulatory subunit 8	1	0.999	12	69	69	69	5	4	5	6	9	8	9	6	7	6	1	0	1	2	5	4	5	6	9	8	9	6	7	6	1	0	1	2	5	4	5	6	9	8	9
sp|P62242|RS8_MOUSE	P62242	RS8_MOUSE	Rps8	208	44.7	Mus musculus OX=10090	1:Experimental evidence at protein level	40S ribosomal protein S8	1	0.999	11	116	116	116	8	12	9	11	11	10	9	6	6	6	7	7	7	7	8	12	9	11	11	10	9	6	6	6	7	7	7	7	8	12	9	11	11	10	9
sp|P62245|RS15A_MOUSE	P62245	RS15A_MOUSE	Rps15a	130	63.8	Mus musculus OX=10090	1:Experimental evidence at protein level	40S ribosomal protein S15a	1	0.999	10	53	53	53	3	4	4	3	7	6	8	3	3	4	2	2	2	2	3	4	4	3	7	6	8	3	3	4	2	2	2	2	3	4	4	3	7	6	8
sp|P62259|1433E_MOUSE	P62259	1433E_MOUSE	Ywhae	255	66.3	Mus musculus OX=10090	1:Experimental evidence at protein level	14-3-3 protein epsilon	1	0.999	20	192	151	192	14	14	15	15	20	18	19	16	13	17	8	8	9	6	11	11	12	12	16	15	16	13	11	13	5	5	7	4	14	14	15	15	20	18	19
sp|P62264|RS14_MOUSE	P62264	RS14_MOUSE	Rps14	151	30.5	Mus musculus OX=10090	1:Experimental evidence at protein level	40S ribosomal protein S14	1	0.999	4	44	44	44	3	3	3	3	6	5	4	3	3	3	2	2	2	2	3	3	3	3	6	5	4	3	3	3	2	2	2	2	3	3	3	3	6	5	4
sp|P62267|RS23_MOUSE	P62267	RS23_MOUSE	Rps23	143	21.7	Mus musculus OX=10090	1:Experimental evidence at protein level	40S ribosomal protein S23	1	0.999	3	16	16	16	2	3	3	3	1	1	1	0	0	1	1	0	0	0	2	3	3	3	1	1	1	0	0	1	1	0	0	0	2	3	3	3	1	1	1
sp|P62270|RS18_MOUSE	P62270	RS18_MOUSE	Rps18	152	61.2	Mus musculus OX=10090	1:Experimental evidence at protein level	40S ribosomal protein S18	1	0.999	13	141	141	141	11	14	13	12	14	12	12	10	6	11	6	6	7	7	11	14	13	12	14	12	12	10	6	11	6	6	7	7	11	14	13	12	14	12	12
sp|P62274|RS29_MOUSE	P62274	RS29_MOUSE	Rps29	56	41.1	Mus musculus OX=10090	1:Experimental evidence at protein level	40S ribosomal protein S29	1	0.999	2	15	15	15	2	2	2	2	2	1	1	1	0	1	0	1	0	0	2	2	2	2	2	1	1	1	0	1	0	1	0	0	2	2	2	2	2	1	1
sp|P62281|RS11_MOUSE	P62281	RS11_MOUSE	Rps11	158	55.7	Mus musculus OX=10090	1:Experimental evidence at protein level	40S ribosomal protein S11	1	0.999	14	92	92	92	7	8	9	10	10	12	13	4	3	6	3	3	2	2	7	8	9	10	10	12	13	4	3	6	3	3	2	2	7	8	9	10	10	12	13
sp|P62301|RS13_MOUSE	P62301	RS13_MOUSE	Rps13	151	60.3	Mus musculus OX=10090	1:Experimental evidence at protein level	40S ribosomal protein S13	1	0.999	11	98	98	98	8	9	9	7	10	9	11	6	5	6	5	3	4	6	8	9	9	7	10	9	11	6	5	6	5	3	4	6	8	9	9	7	10	9	11
sp|P62307|RUXF_MOUSE	P62307	RUXF_MOUSE	Snrpf	86	15.1	Mus musculus OX=10090	1:Experimental evidence at protein level	Small nuclear ribonucleoprotein F	1	0.999	1	6	6	6	0	0	0	0	2	3	1	0	0	0	0	0	0	0	0	0	0	0	2	3	1	0	0	0	0	0	0	0	0	0	0	0	2	3	1
sp|P62315|SMD1_MOUSE	P62315	SMD1_MOUSE	Snrpd1	119	37	Mus musculus OX=10090	1:Experimental evidence at protein level	Small nuclear ribonucleoprotein Sm D1	1	0.999	3	7	7	7	0	2	1	1	1	1	1	0	0	0	0	0	0	0	0	2	1	1	1	1	1	0	0	0	0	0	0	0	0	2	1	1	1	1	1
sp|P62334|PRS10_MOUSE	P62334	PRS10_MOUSE	Psmc6	389	40.9	Mus musculus OX=10090	1:Experimental evidence at protein level	26S proteasome regulatory subunit 10B	1	0.999	13	47	47	47	1	1	2	4	7	7	6	6	5	6	0	1	1	0	1	1	2	4	7	7	6	6	5	6	0	1	1	0	1	1	2	4	7	7	6
sp|P62631|EF1A2_MOUSE	P62631	EF1A2_MOUSE	Eef1a2	463	32	Mus musculus OX=10090	1:Experimental evidence at protein level	Elongation factor 1-alpha 2	1	0.999	14	21	21	168	4	2	3	3	2	4	2	0	0	0	0	0	1	0	4	2	3	3	2	4	2	0	0	0	0	0	1	0	14	11	16	12	17	19	14
sp|P62702|RS4X_MOUSE	P62702	RS4X_MOUSE	Rps4x	263	56.3	Mus musculus OX=10090	1:Experimental evidence at protein level	40S ribosomal protein S4, X isoform	1	0.999	19	184	184	184	14	14	13	13	20	19	18	12	12	13	9	10	7	10	14	14	13	13	20	19	18	12	12	13	9	10	7	10	14	14	13	13	20	19	18
sp|P62717|RL18A_MOUSE	P62717	RL18A_MOUSE	Rpl18a	176	43.2	Mus musculus OX=10090	1:Experimental evidence at protein level	60S ribosomal protein L18a	1	0.999	9	42	42	42	5	6	4	6	7	7	6	0	0	1	0	0	0	0	5	6	4	6	7	7	6	0	0	1	0	0	0	0	5	6	4	6	7	7	6
sp|P62743|AP2S1_MOUSE	P62743	AP2S1_MOUSE	Ap2s1	142	19	Mus musculus OX=10090	1:Experimental evidence at protein level	AP-2 complex subunit sigma	1	0.999	3	27	27	27	2	3	2	2	2	2	2	1	2	1	1	1	3	3	2	3	2	2	2	2	2	1	2	1	1	1	3	3	2	3	2	2	2	2	2
sp|P62751|RL23A_MOUSE	P62751	RL23A_MOUSE	Rpl23a	156	48.1	Mus musculus OX=10090	1:Experimental evidence at protein level	60S ribosomal protein L23a	1	0.999	9	65	65	65	4	5	6	7	4	8	4	5	6	5	4	2	2	3	4	5	6	7	4	8	4	5	6	5	4	2	2	3	4	5	6	7	4	8	4
sp|P62754|RS6_MOUSE	P62754	RS6_MOUSE	Rps6	249	30.5	Mus musculus OX=10090	1:Experimental evidence at protein level	40S ribosomal protein S6	1	0.999	14	81	81	81	8	6	6	9	9	8	9	5	4	6	3	2	3	3	8	6	6	9	9	8	9	5	4	6	3	2	3	3	8	6	6	9	9	8	9
sp|P62806|H4_MOUSE	P62806	H4_MOUSE	H4c1	103	53.4	Mus musculus OX=10090	1:Experimental evidence at protein level	Histone H4	1	0.999	10	127	127	127	11	10	9	7	12	11	14	7	10	9	7	5	7	8	11	10	9	7	12	11	14	7	10	9	7	5	7	8	11	10	9	7	12	11	14
sp|P62830|RL23_MOUSE	P62830	RL23_MOUSE	Rpl23	140	23.6	Mus musculus OX=10090	1:Experimental evidence at protein level	60S ribosomal protein L23	1	0.999	3	27	27	27	1	2	1	1	3	3	4	1	3	2	1	2	1	2	1	2	1	1	3	3	4	1	3	2	1	2	1	2	1	2	1	1	3	3	4
sp|P62843|RS15_MOUSE	P62843	RS15_MOUSE	Rps15	145	56.6	Mus musculus OX=10090	1:Experimental evidence at protein level	40S ribosomal protein S15	1	0.999	7	22	22	22	1	2	0	1	4	6	7	0	1	0	0	0	0	0	1	2	0	1	4	6	7	0	1	0	0	0	0	0	1	2	0	1	4	6	7
sp|P62849|RS24_MOUSE	P62849	RS24_MOUSE	Rps24	133	39.8	Mus musculus OX=10090	1:Experimental evidence at protein level	40S ribosomal protein S24	1	0.999	6	32	32	32	3	3	2	3	5	4	2	2	2	2	1	1	1	1	3	3	2	3	5	4	2	2	2	2	1	1	1	1	3	3	2	3	5	4	2
sp|P62852|RS25_MOUSE	P62852	RS25_MOUSE	Rps25	125	29.6	Mus musculus OX=10090	1:Experimental evidence at protein level	40S ribosomal protein S25	1	0.999	4	35	35	35	3	3	3	3	5	4	4	2	2	2	0	0	1	3	3	3	3	3	5	4	4	2	2	2	0	0	1	3	3	3	3	3	5	4	4
sp|P62855|RS26_MOUSE	P62855	RS26_MOUSE	Rps26	115	27	Mus musculus OX=10090	1:Experimental evidence at protein level	40S ribosomal protein S26	1	0.999	3	25	25	25	1	1	2	2	2	2	1	2	2	2	2	2	2	2	1	1	2	2	2	2	1	2	2	2	2	2	2	2	1	1	2	2	2	2	1
sp|P62858|RS28_MOUSE	P62858	RS28_MOUSE	Rps28	69	46.4	Mus musculus OX=10090	1:Experimental evidence at protein level	40S ribosomal protein S28	1	0.999	3	30	30	30	3	3	3	3	3	3	3	2	2	2	0	1	1	1	3	3	3	3	3	3	3	2	2	2	0	1	1	1	3	3	3	3	3	3	3
sp|P62889|RL30_MOUSE	P62889	RL30_MOUSE	Rpl30	115	67	Mus musculus OX=10090	1:Experimental evidence at protein level	60S ribosomal protein L30	1	0.999	8	44	44	44	3	2	2	3	8	5	6	3	3	4	2	1	0	2	3	2	2	3	8	5	6	3	3	4	2	1	0	2	3	2	2	3	8	5	6
sp|P62900|RL31_MOUSE	P62900	RL31_MOUSE	Rpl31	125	45.6	Mus musculus OX=10090	1:Experimental evidence at protein level	60S ribosomal protein L31	1	0.999	7	55	55	55	5	5	4	6	5	5	5	4	3	4	2	1	3	3	5	5	4	6	5	5	5	4	3	4	2	1	3	3	5	5	4	6	5	5	5
sp|P62908|RS3_MOUSE	P62908	RS3_MOUSE	Rps3	243	77	Mus musculus OX=10090	1:Experimental evidence at protein level	40S ribosomal protein S3	1	0.999	22	205	205	205	19	19	17	17	24	20	25	9	16	11	6	6	6	10	19	19	17	17	24	20	25	9	16	11	6	6	6	10	19	19	17	17	24	20	25
sp|P62918|RL8_MOUSE	P62918	RL8_MOUSE	Rpl8	257	40.9	Mus musculus OX=10090	1:Experimental evidence at protein level	60S ribosomal protein L8	1	0.999	9	65	65	65	4	4	5	5	6	6	7	5	3	5	4	3	4	4	4	4	5	5	6	6	7	5	3	5	4	3	4	4	4	4	5	5	6	6	7
sp|P62962|PROF1_MOUSE	P62962	PROF1_MOUSE	Pfn1	140	72.1	Mus musculus OX=10090	1:Experimental evidence at protein level	Profilin-1	1	0.999	9	82	82	82	5	7	6	7	12	9	9	5	4	5	3	3	5	2	5	7	6	7	12	9	9	5	4	5	3	3	5	2	5	7	6	7	12	9	9
sp|P63017|HSP7C_MOUSE	P63017	HSP7C_MOUSE	Hspa8	646	74	Mus musculus OX=10090	1:Experimental evidence at protein level	Heat shock cognate 71 kDa protein	1	0.999	40	492	322	538	37	40	33	34	46	49	49	35	37	34	24	25	25	24	24	27	21	22	33	37	35	23	26	23	12	12	14	13	40	43	37	37	48	53	54
sp|P63028|TCTP_MOUSE	P63028	TCTP_MOUSE	Tpt1	172	27.9	Mus musculus OX=10090	1:Experimental evidence at protein level	Translationally-controlled tumor protein	1	0.999	4	18	18	18	0	1	1	0	4	3	4	2	2	1	0	0	0	0	0	1	1	0	4	3	4	2	2	1	0	0	0	0	0	1	1	0	4	3	4
sp|P63030|MPC1_MOUSE	P63030	MPC1_MOUSE	Mpc1	109	41.3	Mus musculus OX=10090	1:Experimental evidence at protein level	Mitochondrial pyruvate carrier 1	1	0.999	5	66	66	66	5	5	5	6	8	6	6	4	3	4	4	3	4	3	5	5	5	6	8	6	6	4	3	4	4	3	4	3	5	5	5	6	8	6	6
sp|P63037|DNJA1_MOUSE	P63037	DNJA1_MOUSE	Dnaja1	397	24.9	Mus musculus OX=10090	1:Experimental evidence at protein level	DnaJ homolog subfamily A member 1	1	0.999	8	46	46	46	4	1	4	5	5	6	7	5	2	2	0	0	3	2	4	1	4	5	5	6	7	5	2	2	0	0	3	2	4	1	4	5	5	6	7
sp|P63038|CH60_MOUSE	P63038	CH60_MOUSE	Hspd1	573	75.6	Mus musculus OX=10090	1:Experimental evidence at protein level	60 kDa heat shock protein, mitochondrial	1	0.999	44	597	597	597	39	40	41	41	60	59	68	41	50	45	28	26	29	30	39	40	41	41	60	59	68	41	50	45	28	26	29	30	39	40	41	41	60	59	68
sp|P63073|IF4E_MOUSE	P63073	IF4E_MOUSE	Eif4e	217	17.1	Mus musculus OX=10090	1:Experimental evidence at protein level	Eukaryotic translation initiation factor 4E	1	0.999	3	12	12	12	2	0	1	0	3	3	3	0	0	0	0	0	0	0	2	0	1	0	3	3	3	0	0	0	0	0	0	0	2	0	1	0	3	3	3
sp|P63085|MK01_MOUSE	P63085	MK01_MOUSE	Mapk1	358	17.3	Mus musculus OX=10090	1:Experimental evidence at protein level	Mitogen-activated protein kinase 1	1	0.999	5	11	10	11	0	0	1	0	6	1	2	1	0	0	0	0	0	0	0	0	1	0	5	1	2	1	0	0	0	0	0	0	0	0	1	0	6	1	2
sp|P63101|1433Z_MOUSE	P63101	1433Z_MOUSE	Ywhaz	245	57.6	Mus musculus OX=10090	1:Experimental evidence at protein level	14-3-3 protein zeta/delta	1	0.999	15	120	107	161	10	9	9	9	14	15	12	9	8	7	5	4	6	3	9	8	9	8	11	12	9	8	8	7	5	4	6	3	13	12	12	12	18	18	15
sp|P63158|HMGB1_MOUSE	P63158	HMGB1_MOUSE	Hmgb1	215	21.9	Mus musculus OX=10090	1:Experimental evidence at protein level	High mobility group protein B1	1	0.999	4	25	25	25	1	2	3	2	6	5	3	1	1	1	0	0	0	0	1	2	3	2	6	5	3	1	1	1	0	0	0	0	1	2	3	2	6	5	3
sp|P63276|RS17_MOUSE	P63276	RS17_MOUSE	Rps17	135	63	Mus musculus OX=10090	1:Experimental evidence at protein level	40S ribosomal protein S17	1	0.999	9	50	50	50	4	5	6	4	9	9	8	2	0	2	1	0	0	0	4	5	6	4	9	9	8	2	0	2	1	0	0	0	4	5	6	4	9	9	8
sp|P63323|RS12_MOUSE	P63323	RS12_MOUSE	Rps12	132	38.6	Mus musculus OX=10090	1:Experimental evidence at protein level	40S ribosomal protein S12	1	0.999	5	37	37	37	2	2	2	2	4	4	5	3	3	3	2	1	2	2	2	2	2	2	4	4	5	3	3	3	2	1	2	2	2	2	2	2	4	4	5
sp|P63325|RS10_MOUSE	P63325	RS10_MOUSE	Rps10	165	41.2	Mus musculus OX=10090	1:Experimental evidence at protein level	40S ribosomal protein S10	1	0.999	9	93	93	93	7	8	8	8	9	10	8	7	6	7	7	3	2	3	7	8	8	8	9	10	8	7	6	7	7	3	2	3	7	8	8	8	9	10	8
sp|P67778|PHB_MOUSE	P67778	PHB_MOUSE	Phb	272	76.5	Mus musculus OX=10090	1:Experimental evidence at protein level	Prohibitin	1	0.999	20	222	222	222	16	17	16	18	19	19	20	14	15	15	13	14	13	13	16	17	16	18	19	19	20	14	15	15	13	14	13	13	16	17	16	18	19	19	20
sp|P67871|CSK2B_MOUSE	P67871	CSK2B_MOUSE	Csnk2b	215	11.6	Mus musculus OX=10090	1:Experimental evidence at protein level	Casein kinase II subunit beta	1	0.999	2	8	8	8	0	0	1	0	2	2	2	0	0	1	0	0	0	0	0	0	1	0	2	2	2	0	0	1	0	0	0	0	0	0	1	0	2	2	2
sp|P67984|RL22_MOUSE	P67984	RL22_MOUSE	Rpl22	128	35.2	Mus musculus OX=10090	1:Experimental evidence at protein level	60S ribosomal protein L22	1	0.999	4	42	42	42	3	3	3	3	3	3	3	3	3	3	2	3	4	3	3	3	3	3	3	3	3	3	3	3	2	3	4	3	3	3	3	3	3	3	3
sp|P68037|UB2L3_MOUSE	P68037	UB2L3_MOUSE	Ube2l3	154	40.3	Mus musculus OX=10090	1:Experimental evidence at protein level	Ubiquitin-conjugating enzyme E2 L3	1	0.999	5	41	41	41	3	4	3	4	5	4	4	4	3	4	1	0	1	1	3	4	3	4	5	4	4	4	3	4	1	0	1	1	3	4	3	4	5	4	4
sp|P68040|RACK1_MOUSE	P68040	RACK1_MOUSE	Rack1	317	61.2	Mus musculus OX=10090	1:Experimental evidence at protein level	Receptor of activated protein C kinase 1	1	0.999	18	136	136	136	10	10	10	9	19	15	15	6	10	9	5	5	6	7	10	10	10	9	19	15	15	6	10	9	5	5	6	7	10	10	10	9	19	15	15
sp|P68254|1433T_MOUSE	P68254	1433T_MOUSE	Ywhaq	245	49.8	Mus musculus OX=10090	1:Experimental evidence at protein level	14-3-3 protein theta	1	0.999	14	39	39	93	2	1	1	1	11	5	8	2	3	3	0	0	1	1	2	1	1	1	11	5	8	2	3	3	0	0	1	1	6	5	4	5	18	11	14
sp|P68510|1433F_MOUSE	P68510	1433F_MOUSE	Ywhah	246	36.6	Mus musculus OX=10090	1:Experimental evidence at protein level	14-3-3 protein eta	1	0.999	9	38	38	84	4	4	3	3	4	3	4	2	3	2	1	0	4	1	4	4	3	3	4	3	4	2	3	2	1	0	4	1	7	7	6	7	9	7	9
sp|P70122|SBDS_MOUSE	P70122	SBDS_MOUSE	Sbds	250	18.4	Mus musculus OX=10090	1:Experimental evidence at protein level	Ribosome maturation protein SBDS	1	0.999	4	7	7	7	0	0	0	0	1	3	0	1	0	2	0	0	0	0	0	0	0	0	1	3	0	1	0	2	0	0	0	0	0	0	0	0	1	3	0
sp|P70168|IMB1_MOUSE	P70168	IMB1_MOUSE	Kpnb1	876	13.2	Mus musculus OX=10090	1:Experimental evidence at protein level	Importin subunit beta-1	1	0.999	9	46	46	46	4	3	3	4	7	6	7	3	4	3	0	0	1	1	4	3	3	4	7	6	7	3	4	3	0	0	1	1	4	3	3	4	7	6	7
sp|P70194|CLC4F_MOUSE	P70194	CLC4F_MOUSE	Clec4f	548	21.9	Mus musculus OX=10090	1:Experimental evidence at protein level	C-type lectin domain family 4 member F	1	0.999	10	42	42	42	3	3	0	0	10	7	7	3	3	4	0	0	1	1	3	3	0	0	10	7	7	3	3	4	0	0	1	1	3	3	0	0	10	7	7
sp|P70195|PSB7_MOUSE	P70195	PSB7_MOUSE	Psmb7	277	19.1	Mus musculus OX=10090	1:Experimental evidence at protein level	Proteasome subunit beta type-7	1	0.999	5	25	25	25	2	2	1	3	2	4	3	2	1	2	0	1	1	1	2	2	1	3	2	4	3	2	1	2	0	1	1	1	2	2	1	3	2	4	3
sp|P70245|EBP_MOUSE	P70245	EBP_MOUSE	Ebp	230	15.2	Mus musculus OX=10090	1:Experimental evidence at protein level	3-beta-hydroxysteroid-Delta(8),Delta(7)-isomerase	1	0.999	3	41	41	41	3	2	2	3	6	5	5	2	3	3	2	2	1	2	3	2	2	3	6	5	5	2	3	3	2	2	1	2	3	2	2	3	6	5	5
sp|P70296|PEBP1_MOUSE	P70296	PEBP1_MOUSE	Pebp1	187	44.9	Mus musculus OX=10090	1:Experimental evidence at protein level	Phosphatidylethanolamine-binding protein 1	1	0.999	5	34	34	34	1	2	2	3	5	6	3	4	4	4	0	0	0	0	1	2	2	3	5	6	3	4	4	4	0	0	0	0	1	2	2	3	5	6	3
sp|P70302|STIM1_MOUSE	P70302	STIM1_MOUSE	Stim1	685	7.7	Mus musculus OX=10090	1:Experimental evidence at protein level	Stromal interaction molecule 1	1	0.999	2	3	3	3	0	0	1	0	0	0	0	0	1	1	0	0	0	0	0	0	1	0	0	0	0	0	1	1	0	0	0	0	0	0	1	0	0	0	0
sp|P70333|HNRH2_MOUSE	P70333	HNRH2_MOUSE	Hnrnph2	449	27.6	Mus musculus OX=10090	1:Experimental evidence at protein level	Heterogeneous nuclear ribonucleoprotein H2	1	0.999	8	45	13	56	3	4	2	4	5	6	5	4	3	3	2	1	2	1	1	2	0	2	2	3	2	0	1	0	0	0	0	0	4	5	3	5	6	6	5
sp|P70362|UFD1_MOUSE	P70362	UFD1_MOUSE	Ufd1	307	16.3	Mus musculus OX=10090	1:Experimental evidence at protein level	Ubiquitin recognition factor in ER-associated degradation protein 1	1	0.999	5	9	9	9	0	0	0	0	2	3	3	1	0	0	0	0	0	0	0	0	0	0	2	3	3	1	0	0	0	0	0	0	0	0	0	0	2	3	3
sp|P70372|ELAV1_MOUSE	P70372	ELAV1_MOUSE	Elavl1	326	32.8	Mus musculus OX=10090	1:Experimental evidence at protein level	ELAV-like protein 1	1	0.999	8	28	28	28	2	3	1	3	3	3	2	3	5	3	0	0	0	0	2	3	1	3	3	3	2	3	5	3	0	0	0	0	2	3	1	3	3	3	2
sp|P70398|USP9X_MOUSE	P70398	USP9X_MOUSE	Usp9x	2559	5.4	Mus musculus OX=10090	1:Experimental evidence at protein level	Probable ubiquitin carboxyl-terminal hydrolase FAF-X	1	0.999	10	18	18	18	0	0	1	0	5	4	6	0	1	1	0	0	0	0	0	0	1	0	5	4	6	0	1	1	0	0	0	0	0	0	1	0	5	4	6
sp|P70404|IDHG1_MOUSE	P70404	IDHG1_MOUSE	Idh3g	393	12.5	Mus musculus OX=10090	1:Experimental evidence at protein level	Isocitrate dehydrogenase [NAD] subunit gamma 1, mitochondrial	1	0.999	5	9	9	9	0	1	1	0	0	3	1	1	1	1	0	0	0	0	0	1	1	0	0	3	1	1	1	1	0	0	0	0	0	1	1	0	0	3	1
sp|P70441|NHRF1_MOUSE	P70441	NHRF1_MOUSE	Slc9a3r1	355	50.4	Mus musculus OX=10090	1:Experimental evidence at protein level	Na(+)/H(+) exchange regulatory cofactor NHE-RF1	1	0.999	15	69	69	69	5	4	6	5	10	12	13	5	3	6	0	0	0	0	5	4	6	5	10	12	13	5	3	6	0	0	0	0	5	4	6	5	10	12	13
sp|P70452|STX4_MOUSE	P70452	STX4_MOUSE	Stx4	298	19.1	Mus musculus OX=10090	1:Experimental evidence at protein level	Syntaxin-4	1	0.999	3	7	7	7	1	0	0	0	3	2	1	0	0	0	0	0	0	0	1	0	0	0	3	2	1	0	0	0	0	0	0	0	1	0	0	0	3	2	1
sp|P70460|VASP_MOUSE	P70460	VASP_MOUSE	Vasp	375	5.6	Mus musculus OX=10090	1:Experimental evidence at protein level	Vasodilator-stimulated phosphoprotein	1	0.999	2	8	8	8	0	1	1	0	2	2	1	0	0	1	0	0	0	0	0	1	1	0	2	2	1	0	0	1	0	0	0	0	0	1	1	0	2	2	1
sp|P70677|CASP3_MOUSE	P70677	CASP3_MOUSE	Casp3	277	8.7	Mus musculus OX=10090	1:Experimental evidence at protein level	Caspase-3	1	0.999	2	8	8	8	1	1	0	1	2	1	1	0	0	1	0	0	0	0	1	1	0	1	2	1	1	0	0	1	0	0	0	0	1	1	0	1	2	1	1
sp|P70697|DCUP_MOUSE	P70697	DCUP_MOUSE	Urod	367	14.4	Mus musculus OX=10090	1:Experimental evidence at protein level	Uroporphyrinogen decarboxylase	1	0.999	4	6	6	6	0	0	0	0	0	1	0	1	3	1	0	0	0	0	0	0	0	0	0	1	0	1	3	1	0	0	0	0	0	0	0	0	0	1	0
sp|P80313|TCPH_MOUSE	P80313	TCPH_MOUSE	Cct7	544	43.9	Mus musculus OX=10090	1:Experimental evidence at protein level	T-complex protein 1 subunit eta	1	0.999	18	93	93	93	4	5	3	8	13	15	11	11	9	9	1	0	2	2	4	5	3	8	13	15	11	11	9	9	1	0	2	2	4	5	3	8	13	15	11
sp|P80314|TCPB_MOUSE	P80314	TCPB_MOUSE	Cct2	535	46.5	Mus musculus OX=10090	1:Experimental evidence at protein level	T-complex protein 1 subunit beta	1	0.999	23	108	108	108	7	7	4	9	15	14	14	11	8	12	2	1	2	2	7	7	4	9	15	14	14	11	8	12	2	1	2	2	7	7	4	9	15	14	14
sp|P80315|TCPD_MOUSE	P80315	TCPD_MOUSE	Cct4	539	44	Mus musculus OX=10090	1:Experimental evidence at protein level	T-complex protein 1 subunit delta	1	0.999	20	141	141	141	11	11	11	14	15	15	15	11	11	13	3	1	6	4	11	11	11	14	15	15	15	11	11	13	3	1	6	4	11	11	11	14	15	15	15
sp|P80316|TCPE_MOUSE	P80316	TCPE_MOUSE	Cct5	541	33.3	Mus musculus OX=10090	1:Experimental evidence at protein level	T-complex protein 1 subunit epsilon	1	0.999	16	95	95	95	6	4	8	10	12	11	10	10	12	9	1	1	0	1	6	4	8	10	12	11	10	10	12	9	1	1	0	1	6	4	8	10	12	11	10
sp|P80318|TCPG_MOUSE	P80318	TCPG_MOUSE	Cct3	545	36.3	Mus musculus OX=10090	1:Experimental evidence at protein level	T-complex protein 1 subunit gamma	1	0.999	22	134	134	134	8	9	8	13	15	14	18	11	14	12	3	3	3	3	8	9	8	13	15	14	18	11	14	12	3	3	3	3	8	9	8	13	15	14	18
sp|P83940|ELOC_MOUSE	P83940	ELOC_MOUSE	Eloc	112	20.5	Mus musculus OX=10090	1:Experimental evidence at protein level	Elongin-C	1	0.999	3	17	17	17	1	1	2	1	3	3	2	1	1	2	0	0	0	0	1	1	2	1	3	3	2	1	1	2	0	0	0	0	1	1	2	1	3	3	2
sp|P84089|ERH_MOUSE	P84089	ERH_MOUSE	Erh	104	26.9	Mus musculus OX=10090	1:Experimental evidence at protein level	Enhancer of rudimentary homolog	1	0.999	3	6	6	6	0	0	0	0	1	1	1	0	1	2	0	0	0	0	0	0	0	0	1	1	1	0	1	2	0	0	0	0	0	0	0	0	1	1	1
sp|P84091|AP2M1_MOUSE	P84091	AP2M1_MOUSE	Ap2m1	435	27.4	Mus musculus OX=10090	1:Experimental evidence at protein level	AP-2 complex subunit mu	1	0.999	11	56	56	56	5	5	5	5	8	6	6	4	4	6	1	0	0	1	5	5	5	5	8	6	6	4	4	6	1	0	0	1	5	5	5	5	8	6	6
sp|P84099|RL19_MOUSE	P84099	RL19_MOUSE	Rpl19	196	23	Mus musculus OX=10090	1:Experimental evidence at protein level	60S ribosomal protein L19	1	0.999	6	48	48	48	4	5	3	3	5	5	5	2	3	3	3	1	3	3	4	5	3	3	5	5	5	2	3	3	3	1	3	3	4	5	3	3	5	5	5
sp|P84104|SRSF3_MOUSE	P84104	SRSF3_MOUSE	Srsf3	164	31.7	Mus musculus OX=10090	1:Experimental evidence at protein level	Serine/arginine-rich splicing factor 3	1	0.999	6	42	36	42	3	2	3	3	5	5	6	4	2	4	2	1	1	1	3	2	3	3	4	4	5	3	1	3	2	1	1	1	3	2	3	3	5	5	6
sp|P85094|ISC2A_MOUSE	P85094	ISC2A_MOUSE	Isoc2a	206	62.1	Mus musculus OX=10090	1:Experimental evidence at protein level	Isochorismatase domain-containing protein 2A	1	0.999	7	40	40	40	2	3	3	3	7	4	4	2	3	3	1	1	2	2	2	3	3	3	7	4	4	2	3	3	1	1	2	2	2	3	3	3	7	4	4
sp|P97290|IC1_MOUSE	P97290	IC1_MOUSE	Serping1	504	6.9	Mus musculus OX=10090	1:Experimental evidence at protein level	Plasma protease C1 inhibitor	1	0.999	2	3	3	3	0	0	0	0	1	1	1	0	0	0	0	0	0	0	0	0	0	0	1	1	1	0	0	0	0	0	0	0	0	0	0	0	1	1	1
sp|P97315|CSRP1_MOUSE	P97315	CSRP1_MOUSE	Csrp1	193	24.4	Mus musculus OX=10090	1:Experimental evidence at protein level	Cysteine and glycine-rich protein 1	1	0.999	3	6	6	6	0	0	0	0	2	2	2	0	0	0	0	0	0	0	0	0	0	0	2	2	2	0	0	0	0	0	0	0	0	0	0	0	2	2	2
sp|P97328|KHK_MOUSE	P97328	KHK_MOUSE	Khk	298	25.2	Mus musculus OX=10090	1:Experimental evidence at protein level	Ketohexokinase	1	0.999	4	28	28	28	2	2	1	1	5	5	5	2	3	2	0	0	0	0	2	2	1	1	5	5	5	2	3	2	0	0	0	0	2	2	1	1	5	5	5
sp|P97351|RS3A_MOUSE	P97351	RS3A_MOUSE	Rps3a	264	56.1	Mus musculus OX=10090	1:Experimental evidence at protein level	40S ribosomal protein S3a	1	0.999	17	160	160	160	12	14	13	14	19	17	20	8	9	10	7	4	6	7	12	14	13	14	19	17	20	8	9	10	7	4	6	7	12	14	13	14	19	17	20
sp|P97352|S10AD_MOUSE	P97352	S10AD_MOUSE	S100a13	98	57.1	Mus musculus OX=10090	1:Experimental evidence at protein level	Protein S100-A13	1	0.999	2	4	4	4	0	0	0	0	1	2	1	0	0	0	0	0	0	0	0	0	0	0	1	2	1	0	0	0	0	0	0	0	0	0	0	0	1	2	1
sp|P97364|SPS2_MOUSE	P97364	SPS2_MOUSE	Sephs2	452	22.3	Mus musculus OX=10090	1:Experimental evidence at protein level	Selenide, water dikinase 2	1	0.999	8	51	51	51	4	5	5	5	7	6	5	3	5	3	0	1	1	1	4	5	5	5	7	6	5	3	5	3	0	1	1	1	4	5	5	5	7	6	5
sp|P97371|PSME1_MOUSE	P97371	PSME1_MOUSE	Psme1	249	32.9	Mus musculus OX=10090	1:Experimental evidence at protein level	Proteasome activator complex subunit 1	1	0.999	7	23	23	25	1	0	0	2	3	4	3	3	2	5	0	0	0	0	1	0	0	2	3	4	3	3	2	5	0	0	0	0	1	0	1	3	3	4	3
sp|P97372|PSME2_MOUSE	P97372	PSME2_MOUSE	Psme2	239	61.5	Mus musculus OX=10090	1:Experimental evidence at protein level	Proteasome activator complex subunit 2	1	0.999	15	71	69	71	4	4	4	5	10	10	9	6	5	8	1	1	2	2	4	4	3	4	10	10	9	6	5	8	1	1	2	2	4	4	4	5	10	10	9
sp|P97379|G3BP2_MOUSE	P97379	G3BP2_MOUSE	G3bp2	482	17	Mus musculus OX=10090	1:Experimental evidence at protein level	Ras GTPase-activating protein-binding protein 2	1	0.999	5	32	32	32	2	2	2	2	7	4	6	2	2	2	1	0	0	0	2	2	2	2	7	4	6	2	2	2	1	0	0	0	2	2	2	2	7	4	6
sp|P97384|ANX11_MOUSE	P97384	ANX11_MOUSE	Anxa11	503	17.1	Mus musculus OX=10090	1:Experimental evidence at protein level	Annexin A11	1	0.999	7	25	25	25	2	2	0	2	4	4	5	1	3	2	0	0	0	0	2	2	0	2	4	4	5	1	3	2	0	0	0	0	2	2	0	2	4	4	5
sp|P97429|ANXA4_MOUSE	P97429	ANXA4_MOUSE	Anxa4	319	41.7	Mus musculus OX=10090	1:Experimental evidence at protein level	Annexin A4	1	0.999	13	52	52	59	5	5	4	5	8	8	6	4	3	3	0	0	0	1	5	5	4	5	8	8	6	4	3	3	0	0	0	1	5	5	4	5	10	9	7
sp|P97449|AMPN_MOUSE	P97449	AMPN_MOUSE	Anpep	966	13.5	Mus musculus OX=10090	1:Experimental evidence at protein level	Aminopeptidase N	1	0.999	10	38	38	38	1	1	2	3	8	7	7	4	3	2	0	0	0	0	1	1	2	3	8	7	7	4	3	2	0	0	0	0	1	1	2	3	8	7	7
sp|P97450|ATP5J_MOUSE	P97450	ATP5J_MOUSE	Atp5pf	108	39.8	Mus musculus OX=10090	1:Experimental evidence at protein level	ATP synthase-coupling factor 6, mitochondrial	1	0.999	5	16	16	16	0	0	0	0	4	3	1	2	3	3	0	0	0	0	0	0	0	0	4	3	1	2	3	3	0	0	0	0	0	0	0	0	4	3	1
sp|P97461|RS5_MOUSE	P97461	RS5_MOUSE	Rps5	204	51	Mus musculus OX=10090	1:Experimental evidence at protein level	40S ribosomal protein S5	1	0.999	10	79	79	79	8	8	8	7	8	7	8	6	5	6	2	2	2	2	8	8	8	7	8	7	8	6	5	6	2	2	2	2	8	8	8	7	8	7	8
sp|P97478|COQ7_MOUSE	P97478	COQ7_MOUSE	Coq7	217	36.9	Mus musculus OX=10090	1:Experimental evidence at protein level	5-demethoxyubiquinone hydroxylase, mitochondrial	1	0.999	4	19	19	19	2	2	1	2	3	3	2	1	2	1	0	0	0	0	2	2	1	2	3	3	2	1	2	1	0	0	0	0	2	2	1	2	3	3	2
sp|P97494|GSH1_MOUSE	P97494	GSH1_MOUSE	Gclc	637	28.1	Mus musculus OX=10090	1:Experimental evidence at protein level	Glutamate--cysteine ligase catalytic subunit	1	0.999	17	83	83	83	6	4	5	6	14	17	15	3	6	6	1	0	0	0	6	4	5	6	14	17	15	3	6	6	1	0	0	0	6	4	5	6	14	17	15
sp|P97501|FMO3_MOUSE	P97501	FMO3_MOUSE	Fmo3	534	44.6	Mus musculus OX=10090	1:Experimental evidence at protein level	Dimethylaniline monooxygenase [N-oxide-forming] 3	1	0.999	24	210	198	210	19	19	19	12	28	18	27	0	14	18	9	4	10	13	18	18	18	11	27	17	26	0	14	17	8	3	9	12	19	19	19	12	28	18	27
sp|P97760|RPB3_MOUSE	P97760	RPB3_MOUSE	Polr2c	275	12.4	Mus musculus OX=10090	1:Experimental evidence at protein level	DNA-directed RNA polymerase II subunit RPB3	1	0.999	2	4	4	4	0	0	0	0	1	2	1	0	0	0	0	0	0	0	0	0	0	0	1	2	1	0	0	0	0	0	0	0	0	0	0	0	1	2	1
sp|P97807|FUMH_MOUSE	P97807	FUMH_MOUSE	Fh	507	53.3	Mus musculus OX=10090	1:Experimental evidence at protein level	Fumarate hydratase, mitochondrial	1	0.999	23	232	232	232	17	18	18	18	20	24	24	20	18	17	9	5	11	13	17	18	18	18	20	24	24	20	18	17	9	5	11	13	17	18	18	18	20	24	24
sp|P97823|LYPA1_MOUSE	P97823	LYPA1_MOUSE	Lypla1	230	13.9	Mus musculus OX=10090	1:Experimental evidence at protein level	Acyl-protein thioesterase 1	1	0.999	3	23	23	23	2	2	2	2	2	1	2	3	3	3	0	0	0	1	2	2	2	2	2	1	2	3	3	3	0	0	0	1	2	2	2	2	2	1	2
sp|P97855|G3BP1_MOUSE	P97855	G3BP1_MOUSE	G3bp1	465	16.1	Mus musculus OX=10090	1:Experimental evidence at protein level	Ras GTPase-activating protein-binding protein 1	1	0.999	5	21	21	21	2	2	2	2	3	3	3	1	1	2	0	0	0	0	2	2	2	2	3	3	3	1	1	2	0	0	0	0	2	2	2	2	3	3	3
sp|P97872|FMO5_MOUSE	P97872	FMO5_MOUSE	Fmo5	533	54.8	Mus musculus OX=10090	1:Experimental evidence at protein level	Flavin-containing monooxygenase 5	1	0.999	29	219	219	219	16	16	14	21	27	30	22	16	15	13	9	5	9	6	16	16	14	21	27	30	22	16	15	13	9	5	9	6	16	16	14	21	27	30	22
sp|P98078|DAB2_MOUSE	P98078	DAB2_MOUSE	Dab2	766	4	Mus musculus OX=10090	1:Experimental evidence at protein level	Disabled homolog 2	1	0.999	2	2	2	2	0	0	0	0	1	1	0	0	0	0	0	0	0	0	0	0	0	0	1	1	0	0	0	0	0	0	0	0	0	0	0	0	1	1	0
sp|P99025|GFRP_MOUSE	P99025	GFRP_MOUSE	Gchfr	84	33.3	Mus musculus OX=10090	1:Experimental evidence at protein level	GTP cyclohydrolase 1 feedback regulatory protein	1	0.999	3	6	6	6	0	1	0	0	3	2	0	0	0	0	0	0	0	0	0	1	0	0	3	2	0	0	0	0	0	0	0	0	0	1	0	0	3	2	0
sp|P99026|PSB4_MOUSE	P99026	PSB4_MOUSE	Psmb4	264	24.2	Mus musculus OX=10090	1:Experimental evidence at protein level	Proteasome subunit beta type-4	1	0.999	4	38	38	38	4	2	2	2	6	5	4	2	3	4	1	1	1	1	4	2	2	2	6	5	4	2	3	4	1	1	1	1	4	2	2	2	6	5	4
sp|P99027|RLA2_MOUSE	P99027	RLA2_MOUSE	Rplp2	115	78.3	Mus musculus OX=10090	1:Experimental evidence at protein level	60S acidic ribosomal protein P2	1	0.999	8	92	92	92	4	6	6	8	8	8	9	7	7	8	6	4	5	6	4	6	6	8	8	8	9	7	7	8	6	4	5	6	4	6	6	8	8	8	9
sp|P99029|PRDX5_MOUSE	P99029	PRDX5_MOUSE	Prdx5	210	38.6	Mus musculus OX=10090	1:Experimental evidence at protein level	Peroxiredoxin-5, mitochondrial	1	0.999	10	126	126	126	12	9	8	10	14	12	12	8	10	7	6	6	5	7	12	9	8	10	14	12	12	8	10	7	6	6	5	7	12	9	8	10	14	12	12
sp|Q00519|XDH_MOUSE	Q00519	XDH_MOUSE	Xdh	1335	11.9	Mus musculus OX=10090	1:Experimental evidence at protein level	Xanthine dehydrogenase/oxidase	1	0.999	11	26	26	38	0	0	1	1	5	4	6	3	3	3	0	0	0	0	0	0	1	1	5	4	6	3	3	3	0	0	0	0	1	1	2	2	6	5	7
sp|Q00623|APOA1_MOUSE	Q00623	APOA1_MOUSE	Apoa1	264	55.7	Mus musculus OX=10090	1:Experimental evidence at protein level	Apolipoprotein A-I	1	0.999	19	181	181	181	13	14	15	13	16	13	17	15	15	15	10	8	8	9	13	14	15	13	16	13	17	15	15	15	10	8	8	9	13	14	15	13	16	13	17
sp|Q00PI9|HNRL2_MOUSE	Q00PI9	HNRL2_MOUSE	Hnrnpul2	745	11.4	Mus musculus OX=10090	1:Experimental evidence at protein level	Heterogeneous nuclear ribonucleoprotein U-like protein 2	1	0.999	6	18	18	18	0	1	0	2	5	2	3	2	1	2	0	0	0	0	0	1	0	2	5	2	3	2	1	2	0	0	0	0	0	1	0	2	5	2	3
sp|Q01149|CO1A2_MOUSE	Q01149	CO1A2_MOUSE	Col1a2	1372	6.1	Mus musculus OX=10090	1:Experimental evidence at protein level	Collagen alpha-2(I) chain	1	0.999	5	15	15	15	0	0	0	0	1	0	1	5	4	4	0	0	0	0	0	0	0	0	1	0	1	5	4	4	0	0	0	0	0	0	0	0	1	0	1
sp|Q01405|SC23A_MOUSE	Q01405	SC23A_MOUSE	Sec23a	765	29	Mus musculus OX=10090	1:Experimental evidence at protein level	Protein transport protein Sec23A	1	0.999	17	105	103	105	7	8	8	10	13	12	15	6	6	7	3	2	4	4	7	8	8	10	13	11	14	6	6	7	3	2	4	4	7	8	8	10	13	12	15
sp|Q01730|RSU1_MOUSE	Q01730	RSU1_MOUSE	Rsu1	277	10.1	Mus musculus OX=10090	1:Experimental evidence at protein level	Ras suppressor protein 1	1	0.999	3	4	4	4	0	0	0	0	2	0	1	0	1	0	0	0	0	0	0	0	0	0	2	0	1	0	1	0	0	0	0	0	0	0	0	0	2	0	1
sp|Q01768|NDKB_MOUSE	Q01768	NDKB_MOUSE	Nme2	152	51.3	Mus musculus OX=10090	1:Experimental evidence at protein level	Nucleoside diphosphate kinase B	1	0.999	9	72	24	72	5	6	7	5	7	8	7	6	8	6	1	1	2	3	2	2	3	2	3	3	2	3	2	2	0	0	0	0	5	6	7	5	7	8	7
sp|Q01853|TERA_MOUSE	Q01853	TERA_MOUSE	Vcp	806	57.9	Mus musculus OX=10090	1:Experimental evidence at protein level	Transitional endoplasmic reticulum ATPase	1	0.999	48	400	400	400	31	28	28	31	44	46	47	31	30	32	14	14	10	14	31	28	28	31	44	46	47	31	30	32	14	14	10	14	31	28	28	31	44	46	47
sp|Q02013|AQP1_MOUSE	Q02013	AQP1_MOUSE	Aqp1	269	17.1	Mus musculus OX=10090	1:Experimental evidence at protein level	Aquaporin-1	1	0.999	4	36	36	36	3	3	3	3	3	3	3	2	3	3	3	2	1	1	3	3	3	3	3	3	3	2	3	3	3	2	1	1	3	3	3	3	3	3	3
sp|Q02248|CTNB1_MOUSE	Q02248	CTNB1_MOUSE	Ctnnb1	781	23.9	Mus musculus OX=10090	1:Experimental evidence at protein level	Catenin beta-1	1	0.999	13	59	58	59	3	4	3	3	10	12	10	4	5	5	0	0	0	0	3	4	3	3	10	12	9	4	5	5	0	0	0	0	3	4	3	3	10	12	10
sp|Q02257|PLAK_MOUSE	Q02257	PLAK_MOUSE	Jup	745	19.6	Mus musculus OX=10090	1:Experimental evidence at protein level	Junction plakoglobin	1	0.999	11	35	35	36	1	2	3	3	7	8	7	0	2	1	1	0	0	0	1	2	3	3	7	8	7	0	2	1	1	0	0	0	1	2	3	3	7	8	8
sp|Q02357|ANK1_MOUSE	Q02357	ANK1_MOUSE	Ank1	1862	4.7	Mus musculus OX=10090	1:Experimental evidence at protein level	Ankyrin-1	1	0.999	3	4	4	4	0	0	0	0	3	0	1	0	0	0	0	0	0	0	0	0	0	0	3	0	1	0	0	0	0	0	0	0	0	0	0	0	3	0	1
sp|Q03265|ATPA_MOUSE	Q03265	ATPA_MOUSE	Atp5f1a	553	62.2	Mus musculus OX=10090	1:Experimental evidence at protein level	ATP synthase subunit alpha, mitochondrial	1	0.999	40	650	650	650	45	48	47	44	63	58	65	44	47	51	35	31	36	36	45	48	47	44	63	58	65	44	47	51	35	31	36	36	45	48	47	44	63	58	65
sp|Q03311|CHLE_MOUSE	Q03311	CHLE_MOUSE	Bche	603	6.1	Mus musculus OX=10090	1:Experimental evidence at protein level	Cholinesterase	1	0.999	3	6	6	6	0	0	1	0	1	2	2	0	0	0	0	0	0	0	0	0	1	0	1	2	2	0	0	0	0	0	0	0	0	0	1	0	1	2	2
sp|Q04447|KCRB_MOUSE	Q04447	KCRB_MOUSE	Ckb	381	5.8	Mus musculus OX=10090	1:Experimental evidence at protein level	Creatine kinase B-type	1	0.999	2	4	4	4	0	0	0	0	2	1	1	0	0	0	0	0	0	0	0	0	0	0	2	1	1	0	0	0	0	0	0	0	0	0	0	0	2	1	1
sp|Q04750|TOP1_MOUSE	Q04750	TOP1_MOUSE	Top1	767	14.9	Mus musculus OX=10090	1:Experimental evidence at protein level	DNA topoisomerase 1	1	0.999	5	12	12	12	0	0	0	0	4	4	4	0	0	0	0	0	0	0	0	0	0	0	4	4	4	0	0	0	0	0	0	0	0	0	0	0	4	4	4
sp|Q04857|CO6A1_MOUSE	Q04857	CO6A1_MOUSE	Col6a1	1025	5.3	Mus musculus OX=10090	1:Experimental evidence at protein level	Collagen alpha-1(VI) chain	1	0.999	4	7	7	7	1	0	0	1	2	1	2	0	0	0	0	0	0	0	1	0	0	1	2	1	2	0	0	0	0	0	0	0	1	0	0	1	2	1	2
sp|Q05421|CP2E1_MOUSE	Q05421	CP2E1_MOUSE	Cyp2e1	493	60.4	Mus musculus OX=10090	1:Experimental evidence at protein level	Cytochrome P450 2E1	1	0.999	31	134	134	134	3	2	2	22	8	30	16	25	2	10	1	10	3	0	3	2	2	22	8	30	16	25	2	10	1	10	3	0	3	2	2	22	8	30	16
sp|Q05793|PGBM_MOUSE	Q05793	PGBM_MOUSE	Hspg2	3707	8.6	Mus musculus OX=10090	1:Experimental evidence at protein level	Basement membrane-specific heparan sulfate proteoglycan core protein	1	0.999	26	106	106	106	6	6	6	7	19	20	17	9	7	8	0	0	1	0	6	6	6	7	19	20	17	9	7	8	0	0	1	0	6	6	6	7	19	20	17
sp|Q05816|FABP5_MOUSE	Q05816	FABP5_MOUSE	Fabp5	135	29.6	Mus musculus OX=10090	1:Experimental evidence at protein level	Fatty acid-binding protein 5	1	0.999	4	34	34	34	2	2	1	2	4	4	4	3	2	3	1	2	2	2	2	2	1	2	4	4	4	3	2	3	1	2	2	2	2	2	1	2	4	4	4
sp|Q05915|GCH1_MOUSE	Q05915	GCH1_MOUSE	Gch1	241	24.5	Mus musculus OX=10090	1:Experimental evidence at protein level	GTP cyclohydrolase 1	1	0.999	6	23	23	23	2	3	2	2	5	3	5	0	1	0	0	0	0	0	2	3	2	2	5	3	5	0	1	0	0	0	0	0	2	3	2	2	5	3	5
sp|Q05920|PYC_MOUSE	Q05920	PYC_MOUSE	Pc	1178	58.7	Mus musculus OX=10090	1:Experimental evidence at protein level	Pyruvate carboxylase, mitochondrial	1	0.999	60	727	726	727	57	58	55	52	73	72	65	47	52	52	36	33	35	40	57	57	55	52	73	72	65	47	52	52	36	33	35	40	57	58	55	52	73	72	65
sp|Q05D44|IF2P_MOUSE	Q05D44	IF2P_MOUSE	Eif5b	1216	19	Mus musculus OX=10090	1:Experimental evidence at protein level	Eukaryotic translation initiation factor 5B	1	0.999	17	40	40	40	0	1	0	2	12	9	12	1	1	2	0	0	0	0	0	1	0	2	12	9	12	1	1	2	0	0	0	0	0	1	0	2	12	9	12
sp|Q07076|ANXA7_MOUSE	Q07076	ANXA7_MOUSE	Anxa7	463	24	Mus musculus OX=10090	1:Experimental evidence at protein level	Annexin A7	1	0.999	11	74	74	74	5	7	2	9	10	11	9	7	5	5	1	0	0	3	5	7	2	9	10	11	9	7	5	5	1	0	0	3	5	7	2	9	10	11	9
sp|Q07417|ACADS_MOUSE	Q07417	ACADS_MOUSE	Acads	412	45.9	Mus musculus OX=10090	1:Experimental evidence at protein level	Short-chain specific acyl-CoA dehydrogenase, mitochondrial	1	0.999	15	138	138	138	7	9	9	8	18	17	21	11	13	11	3	3	5	3	7	9	9	8	18	17	21	11	13	11	3	3	5	3	7	9	9	8	18	17	21
sp|Q07797|LG3BP_MOUSE	Q07797	LG3BP_MOUSE	Lgals3bp	577	14.6	Mus musculus OX=10090	1:Experimental evidence at protein level	Galectin-3-binding protein	1	0.999	4	11	11	11	0	1	0	0	4	2	1	0	1	2	0	0	0	0	0	1	0	0	4	2	1	0	1	2	0	0	0	0	0	1	0	0	4	2	1
sp|Q08857|CD36_MOUSE	Q08857	CD36_MOUSE	Cd36	472	9.3	Mus musculus OX=10090	1:Experimental evidence at protein level	Platelet glycoprotein 4	1	0.999	5	15	15	15	0	0	0	1	4	3	3	2	0	2	0	0	0	0	0	0	0	1	4	3	3	2	0	2	0	0	0	0	0	0	0	1	4	3	3
sp|Q0P678|ZCH18_MOUSE	Q0P678	ZCH18_MOUSE	Zc3h18	948	3.5	Mus musculus OX=10090	1:Experimental evidence at protein level	Zinc finger CCCH domain-containing protein 18	1	0.9989	2	4	4	4	0	0	0	0	1	2	1	0	0	0	0	0	0	0	0	0	0	0	1	2	1	0	0	0	0	0	0	0	0	0	0	0	1	2	1
sp|Q0VBL3|RBM15_MOUSE	Q0VBL3	RBM15_MOUSE	Rbm15	962	11	Mus musculus OX=10090	1:Experimental evidence at protein level	RNA-binding protein 15	1	0.999	5	7	7	7	0	0	0	1	2	2	2	0	0	0	0	0	0	0	0	0	0	1	2	2	2	0	0	0	0	0	0	0	0	0	0	1	2	2	2
sp|Q11011|PSA_MOUSE	Q11011	PSA_MOUSE	Npepps	920	13.5	Mus musculus OX=10090	1:Experimental evidence at protein level	Puromycin-sensitive aminopeptidase	1	0.999	9	14	14	14	0	0	0	0	4	5	5	0	0	0	0	0	0	0	0	0	0	0	4	5	5	0	0	0	0	0	0	0	0	0	0	0	4	5	5
sp|Q14CH7|SYAM_MOUSE	Q14CH7	SYAM_MOUSE	Aars2	980	5.2	Mus musculus OX=10090	1:Experimental evidence at protein level	Alanine--tRNA ligase, mitochondrial	1	0.9984	3	5	5	5	0	0	0	0	2	1	1	0	1	0	0	0	0	0	0	0	0	0	2	1	1	0	1	0	0	0	0	0	0	0	0	0	2	1	1
sp|Q14DH7|ACSS3_MOUSE	Q14DH7	ACSS3_MOUSE	Acss3	682	21	Mus musculus OX=10090	1:Experimental evidence at protein level	Acyl-CoA synthetase short-chain family member 3, mitochondrial	1	0.999	13	58	58	58	4	6	5	3	11	8	8	1	6	5	0	0	0	1	4	6	5	3	11	8	8	1	6	5	0	0	0	1	4	6	5	3	11	8	8
sp|Q1HFZ0|NSUN2_MOUSE	Q1HFZ0	NSUN2_MOUSE	Nsun2	757	2.8	Mus musculus OX=10090	1:Experimental evidence at protein level	RNA cytosine C(5)-methyltransferase NSUN2	1	0.999	2	3	3	3	0	0	0	0	2	0	1	0	0	0	0	0	0	0	0	0	0	0	2	0	1	0	0	0	0	0	0	0	0	0	0	0	2	0	1
sp|Q283N4|URAD_MOUSE	Q283N4	URAD_MOUSE	Urad	178	39.3	Mus musculus OX=10090	1:Experimental evidence at protein level	2-oxo-4-hydroxy-4-carboxy-5-ureidoimidazoline decarboxylase	1	0.999	7	40	40	40	4	4	3	4	4	3	3	2	5	5	0	1	0	2	4	4	3	4	4	3	3	2	5	5	0	1	0	2	4	4	3	4	4	3	3
sp|Q2TBE6|P4K2A_MOUSE	Q2TBE6	P4K2A_MOUSE	Pi4k2a	479	4.4	Mus musculus OX=10090	1:Experimental evidence at protein level	Phosphatidylinositol 4-kinase type 2-alpha	1	0.999	2	2	2	2	0	0	0	0	2	0	0	0	0	0	0	0	0	0	0	0	0	0	2	0	0	0	0	0	0	0	0	0	0	0	0	0	2	0	0
sp|Q2TPA8|HSDL2_MOUSE	Q2TPA8	HSDL2_MOUSE	Hsdl2	490	25.3	Mus musculus OX=10090	1:Experimental evidence at protein level	Hydroxysteroid dehydrogenase-like protein 2	1	0.999	11	85	85	85	7	7	7	7	9	12	11	6	7	7	1	1	1	2	7	7	7	7	9	12	11	6	7	7	1	1	1	2	7	7	7	7	9	12	11
sp|Q32MW3|ACO10_MOUSE	Q32MW3	ACO10_MOUSE	Acot10	439	8	Mus musculus OX=10090	2:Experimental evidence at transcript level	Acyl-coenzyme A thioesterase 10, mitochondrial	1	0.999	4	8	0	8	0	0	0	0	4	2	2	0	0	0	0	0	0	0	0	0	0	0	0	0	0	0	0	0	0	0	0	0	0	0	0	0	4	2	2
sp|Q3B7Z2|OSBP1_MOUSE	Q3B7Z2	OSBP1_MOUSE	Osbp	805	5.5	Mus musculus OX=10090	1:Experimental evidence at protein level	Oxysterol-binding protein 1	1	0.999	4	17	17	17	0	1	1	1	4	4	4	0	1	1	0	0	0	0	0	1	1	1	4	4	4	0	1	1	0	0	0	0	0	1	1	1	4	4	4
sp|Q3TC93|H1BP3_MOUSE	Q3TC93	H1BP3_MOUSE	Hs1bp3	395	10.4	Mus musculus OX=10090	1:Experimental evidence at protein level	HCLS1-binding protein 3	1	0.999	3	3	3	3	0	1	0	0	0	1	1	0	0	0	0	0	0	0	0	1	0	0	0	1	1	0	0	0	0	0	0	0	0	1	0	0	0	1	1
sp|Q3TCJ1|ABRX2_MOUSE	Q3TCJ1	ABRX2_MOUSE	Abraxas2	415	10.8	Mus musculus OX=10090	1:Experimental evidence at protein level	BRISC complex subunit Abraxas 2	1	0.999	4	10	10	10	0	1	1	1	2	2	3	0	0	0	0	0	0	0	0	1	1	1	2	2	3	0	0	0	0	0	0	0	0	1	1	1	2	2	3
sp|Q3TDN2|FAF2_MOUSE	Q3TDN2	FAF2_MOUSE	Faf2	445	21.6	Mus musculus OX=10090	1:Experimental evidence at protein level	FAS-associated factor 2	1	0.999	6	25	25	25	2	2	1	3	4	5	5	1	1	1	0	0	0	0	2	2	1	3	4	5	5	1	1	1	0	0	0	0	2	2	1	3	4	5	5
sp|Q3TDQ1|STT3B_MOUSE	Q3TDQ1	STT3B_MOUSE	Stt3b	823	12.8	Mus musculus OX=10090	1:Experimental evidence at protein level	Dolichyl-diphosphooligosaccharide--protein glycosyltransferase subunit STT3B	1	0.999	12	29	29	31	1	2	1	2	9	4	7	1	1	1	0	0	0	0	1	2	1	2	9	4	7	1	1	1	0	0	0	0	1	2	1	2	10	4	8
sp|Q3TEA8|HP1B3_MOUSE	Q3TEA8	HP1B3_MOUSE	Hp1bp3	554	3.6	Mus musculus OX=10090	1:Experimental evidence at protein level	Heterochromatin protein 1-binding protein 3	1	0.999	2	4	4	4	0	0	0	0	2	1	1	0	0	0	0	0	0	0	0	0	0	0	2	1	1	0	0	0	0	0	0	0	0	0	0	0	2	1	1
sp|Q3THG9|AASD1_MOUSE	Q3THG9	AASD1_MOUSE	Aarsd1	412	8.3	Mus musculus OX=10090	1:Experimental evidence at protein level	Alanyl-tRNA editing protein Aarsd1	1	0.999	2	7	7	7	0	0	0	0	1	1	3	0	1	1	0	0	0	0	0	0	0	0	1	1	3	0	1	1	0	0	0	0	0	0	0	0	1	1	3
sp|Q3THK7|GUAA_MOUSE	Q3THK7	GUAA_MOUSE	Gmps	693	5.8	Mus musculus OX=10090	1:Experimental evidence at protein level	GMP synthase [glutamine-hydrolyzing]	1	0.999	2	3	3	3	0	0	0	0	1	0	2	0	0	0	0	0	0	0	0	0	0	0	1	0	2	0	0	0	0	0	0	0	0	0	0	0	1	0	2
sp|Q3THS6|METK2_MOUSE	Q3THS6	METK2_MOUSE	Mat2a	395	20.5	Mus musculus OX=10090	1:Experimental evidence at protein level	S-adenosylmethionine synthase isoform type-2	1	0.999	6	7	7	48	0	0	0	0	1	2	1	1	1	1	0	0	0	0	0	0	0	0	1	2	1	1	1	1	0	0	0	0	3	3	4	4	4	5	5
sp|Q3TIV5|ZC3HF_MOUSE	Q3TIV5	ZC3HF_MOUSE	Zc3h15	426	12	Mus musculus OX=10090	1:Experimental evidence at protein level	Zinc finger CCCH domain-containing protein 15	1	0.999	4	7	7	7	0	0	0	0	2	4	1	0	0	0	0	0	0	0	0	0	0	0	2	4	1	0	0	0	0	0	0	0	0	0	0	0	2	4	1
sp|Q3TIX9|SNUT2_MOUSE	Q3TIX9	SNUT2_MOUSE	Usp39	564	3.9	Mus musculus OX=10090	1:Experimental evidence at protein level	U4/U6.U5 tri-snRNP-associated protein 2	1	0.999	2	4	4	4	0	0	0	0	2	0	2	0	0	0	0	0	0	0	0	0	0	0	2	0	2	0	0	0	0	0	0	0	0	0	0	0	2	0	2
sp|Q3TL44|NLRX1_MOUSE	Q3TL44	NLRX1_MOUSE	Nlrx1	975	4.2	Mus musculus OX=10090	1:Experimental evidence at protein level	NLR family member X1	1	0.999	3	6	6	6	0	0	0	1	2	1	2	0	0	0	0	0	0	0	0	0	0	1	2	1	2	0	0	0	0	0	0	0	0	0	0	1	2	1	2
sp|Q3TLH4|PRC2C_MOUSE	Q3TLH4	PRC2C_MOUSE	Prrc2c	2846	2.2	Mus musculus OX=10090	1:Experimental evidence at protein level	Protein PRRC2C	1	0.999	4	5	5	5	0	0	0	0	2	2	1	0	0	0	0	0	0	0	0	0	0	0	2	2	1	0	0	0	0	0	0	0	0	0	0	0	2	2	1
sp|Q3TLP5|ECHD2_MOUSE	Q3TLP5	ECHD2_MOUSE	Echdc2	296	36.8	Mus musculus OX=10090	1:Experimental evidence at protein level	Enoyl-CoA hydratase domain-containing protein 2, mitochondrial	1	0.999	8	69	69	69	5	6	4	5	9	9	9	4	7	6	1	2	1	1	5	6	4	5	9	9	9	4	7	6	1	2	1	1	5	6	4	5	9	9	9
sp|Q3TNA1|XYLB_MOUSE	Q3TNA1	XYLB_MOUSE	Xylb	551	18	Mus musculus OX=10090	1:Experimental evidence at protein level	Xylulose kinase	1	0.999	9	80	80	80	6	5	5	5	8	10	11	6	6	6	3	2	3	4	6	5	5	5	8	10	11	6	6	6	3	2	3	4	6	5	5	5	8	10	11
sp|Q3TRM8|HXK3_MOUSE	Q3TRM8	HXK3_MOUSE	Hk3	922	4.9	Mus musculus OX=10090	1:Experimental evidence at protein level	Hexokinase-3	1	0.999	2	5	5	5	0	0	0	0	2	2	1	0	0	0	0	0	0	0	0	0	0	0	2	2	1	0	0	0	0	0	0	0	0	0	0	0	2	2	1
sp|Q3TWW8|SRSF6_MOUSE	Q3TWW8	SRSF6_MOUSE	Srsf6	339	19.5	Mus musculus OX=10090	1:Experimental evidence at protein level	Serine/arginine-rich splicing factor 6	1	0.999	7	26	13	26	2	1	2	2	6	3	5	1	2	1	0	0	0	1	2	1	1	1	3	2	2	0	1	0	0	0	0	0	2	1	2	2	6	3	5
sp|Q3TXS7|PSMD1_MOUSE	Q3TXS7	PSMD1_MOUSE	Psmd1	953	25.5	Mus musculus OX=10090	1:Experimental evidence at protein level	26S proteasome non-ATPase regulatory subunit 1	1	0.999	21	97	97	97	4	5	4	9	15	13	18	7	10	11	0	0	1	0	4	5	4	9	15	13	18	7	10	11	0	0	1	0	4	5	4	9	15	13	18
sp|Q3TYS2|CYBC1_MOUSE	Q3TYS2	CYBC1_MOUSE	Cybc1	187	10.2	Mus musculus OX=10090	1:Experimental evidence at protein level	Cytochrome b-245 chaperone 1	1	0.999	2	4	4	4	0	0	0	0	1	2	1	0	0	0	0	0	0	0	0	0	0	0	1	2	1	0	0	0	0	0	0	0	0	0	0	0	1	2	1
sp|Q3U0V1|FUBP2_MOUSE	Q3U0V1	FUBP2_MOUSE	Khsrp	748	30.9	Mus musculus OX=10090	1:Experimental evidence at protein level	Far upstream element-binding protein 2	1	0.999	19	76	70	76	3	5	3	4	10	14	15	4	7	10	0	0	1	0	3	5	2	3	9	14	15	3	6	9	0	0	1	0	3	5	3	4	10	14	15
sp|Q3U186|SYRM_MOUSE	Q3U186	SYRM_MOUSE	Rars2	578	5.4	Mus musculus OX=10090	1:Experimental evidence at protein level	Probable arginine--tRNA ligase, mitochondrial	1	0.999	3	6	6	6	0	0	0	0	3	1	2	0	0	0	0	0	0	0	0	0	0	0	3	1	2	0	0	0	0	0	0	0	0	0	0	0	3	1	2
sp|Q3U1J4|DDB1_MOUSE	Q3U1J4	DDB1_MOUSE	Ddb1	1140	14	Mus musculus OX=10090	1:Experimental evidence at protein level	DNA damage-binding protein 1	1	0.999	14	71	71	71	4	3	6	7	9	12	9	5	5	6	2	0	2	1	4	3	6	7	9	12	9	5	5	6	2	0	2	1	4	3	6	7	9	12	9
sp|Q3U2P1|SC24A_MOUSE	Q3U2P1	SC24A_MOUSE	Sec24a	1090	9.5	Mus musculus OX=10090	1:Experimental evidence at protein level	Protein transport protein Sec24A	1	0.999	8	33	33	33	1	3	2	3	4	3	5	3	3	5	0	0	0	1	1	3	2	3	4	3	5	3	3	5	0	0	0	1	1	3	2	3	4	3	5
sp|Q3U3R4|LMF1_MOUSE	Q3U3R4	LMF1_MOUSE	Lmf1	574	5.1	Mus musculus OX=10090	1:Experimental evidence at protein level	Lipase maturation factor 1	1	0.999	2	9	9	9	1	1	1	0	1	1	1	1	1	1	0	0	0	0	1	1	1	0	1	1	1	1	1	1	0	0	0	0	1	1	1	0	1	1	1
sp|Q3U487|HECD3_MOUSE	Q3U487	HECD3_MOUSE	Hectd3	861	7.2	Mus musculus OX=10090	1:Experimental evidence at protein level	E3 ubiquitin-protein ligase HECTD3	1	0.999	2	5	5	5	0	0	0	0	2	2	1	0	0	0	0	0	0	0	0	0	0	0	2	2	1	0	0	0	0	0	0	0	0	0	0	0	2	2	1
sp|Q3U9G9|LBR_MOUSE	Q3U9G9	LBR_MOUSE	Lbr	626	11.3	Mus musculus OX=10090	1:Experimental evidence at protein level	Delta(14)-sterol reductase LBR	1	0.999	4	12	12	12	0	1	0	0	3	4	3	0	0	1	0	0	0	0	0	1	0	0	3	4	3	0	0	1	0	0	0	0	0	1	0	0	3	4	3
sp|Q3UBX0|TM109_MOUSE	Q3UBX0	TM109_MOUSE	Tmem109	243	14.8	Mus musculus OX=10090	1:Experimental evidence at protein level	Transmembrane protein 109	1	0.9985	2	5	5	5	1	0	1	1	2	0	0	0	0	0	0	0	0	0	1	0	1	1	2	0	0	0	0	0	0	0	0	0	1	0	1	1	2	0	0
sp|Q3UBZ5|MI4GD_MOUSE	Q3UBZ5	MI4GD_MOUSE	Mif4gd	222	13.5	Mus musculus OX=10090	1:Experimental evidence at protein level	MIF4G domain-containing protein	1	0.999	3	4	4	4	0	0	0	0	3	0	1	0	0	0	0	0	0	0	0	0	0	0	3	0	1	0	0	0	0	0	0	0	0	0	0	0	3	0	1
sp|Q3UDE2|TTL12_MOUSE	Q3UDE2	TTL12_MOUSE	Ttll12	639	5	Mus musculus OX=10090	1:Experimental evidence at protein level	Tubulin--tyrosine ligase-like protein 12	1	0.9989	3	3	3	3	0	0	0	0	2	0	1	0	0	0	0	0	0	0	0	0	0	0	2	0	1	0	0	0	0	0	0	0	0	0	0	0	2	0	1
sp|Q3UEB3|PUF60_MOUSE	Q3UEB3	PUF60_MOUSE	Puf60	564	5	Mus musculus OX=10090	1:Experimental evidence at protein level	Poly(U)-binding-splicing factor PUF60	1	0.999	2	5	5	5	0	0	0	0	2	3	0	0	0	0	0	0	0	0	0	0	0	0	2	3	0	0	0	0	0	0	0	0	0	0	0	0	2	3	0
sp|Q3UEG6|AGT2_MOUSE	Q3UEG6	AGT2_MOUSE	Agxt2	513	26.5	Mus musculus OX=10090	1:Experimental evidence at protein level	Alanine--glyoxylate aminotransferase 2, mitochondrial	1	0.999	12	91	91	91	6	6	6	9	10	11	9	7	8	8	3	2	4	2	6	6	6	9	10	11	9	7	8	8	3	2	4	2	6	6	6	9	10	11	9
sp|Q3UFF7|LYPL1_MOUSE	Q3UFF7	LYPL1_MOUSE	Lyplal1	239	24.7	Mus musculus OX=10090	1:Experimental evidence at protein level	Lysophospholipase-like protein 1	1	0.999	4	9	9	9	0	0	0	0	3	3	3	0	0	0	0	0	0	0	0	0	0	0	3	3	3	0	0	0	0	0	0	0	0	0	0	0	3	3	3
sp|Q3UGC7|EI3JA_MOUSE	Q3UGC7	EI3JA_MOUSE	Eif3j1	261	24.5	Mus musculus OX=10090	2:Experimental evidence at transcript level	Eukaryotic translation initiation factor 3 subunit J-A	1	0.999	7	39	0	39	3	3	3	4	8	5	5	4	2	2	0	0	0	0	0	0	0	0	0	0	0	0	0	0	0	0	0	0	3	3	3	4	8	5	5
sp|Q3UIR3|DTX3L_MOUSE	Q3UIR3	DTX3L_MOUSE	Dtx3l	748	14	Mus musculus OX=10090	1:Experimental evidence at protein level	E3 ubiquitin-protein ligase DTX3L	1	0.999	6	14	14	14	0	0	0	1	2	6	5	0	0	0	0	0	0	0	0	0	0	1	2	6	5	0	0	0	0	0	0	0	0	0	0	1	2	6	5
sp|Q3UIU2|NDUB6_MOUSE	Q3UIU2	NDUB6_MOUSE	Ndufb6	128	38.3	Mus musculus OX=10090	1:Experimental evidence at protein level	NADH dehydrogenase [ubiquinone] 1 beta subcomplex subunit 6	1	0.9986	5	16	16	16	1	1	1	1	5	1	3	1	1	1	0	0	0	0	1	1	1	1	5	1	3	1	1	1	0	0	0	0	1	1	1	1	5	1	3
sp|Q3UJU9|RMD3_MOUSE	Q3UJU9	RMD3_MOUSE	Rmdn3	470	38.5	Mus musculus OX=10090	1:Experimental evidence at protein level	Regulator of microtubule dynamics protein 3	1	0.999	17	69	69	69	6	4	3	7	7	10	10	11	2	7	1	0	0	1	6	4	3	7	7	10	10	11	2	7	1	0	0	1	6	4	3	7	7	10	10
sp|Q3UKJ7|SMU1_MOUSE	Q3UKJ7	SMU1_MOUSE	Smu1	513	8.4	Mus musculus OX=10090	2:Experimental evidence at transcript level	WD40 repeat-containing protein SMU1	1	0.999	2	9	9	9	1	1	1	1	2	2	1	0	0	0	0	0	0	0	1	1	1	1	2	2	1	0	0	0	0	0	0	0	1	1	1	1	2	2	1
sp|Q3UL36|ARGL1_MOUSE	Q3UL36	ARGL1_MOUSE	Arglu1	271	17.7	Mus musculus OX=10090	1:Experimental evidence at protein level	Arginine and glutamate-rich protein 1	1	0.9982	6	16	16	16	1	3	2	1	2	3	3	1	0	0	0	0	0	0	1	3	2	1	2	3	3	1	0	0	0	0	0	0	1	3	2	1	2	3	3
sp|Q3ULD5|MCCB_MOUSE	Q3ULD5	MCCB_MOUSE	Mccc2	563	45.5	Mus musculus OX=10090	1:Experimental evidence at protein level	Methylcrotonoyl-CoA carboxylase beta chain, mitochondrial	1	0.999	21	169	169	169	14	9	12	11	25	26	21	9	13	12	6	2	4	5	14	9	12	11	25	26	21	9	13	12	6	2	4	5	14	9	12	11	25	26	21
sp|Q3ULF4|SPG7_MOUSE	Q3ULF4	SPG7_MOUSE	Spg7	781	11.9	Mus musculus OX=10090	1:Experimental evidence at protein level	Paraplegin	1	0.999	4	5	5	5	0	1	0	1	2	0	1	0	0	0	0	0	0	0	0	1	0	1	2	0	1	0	0	0	0	0	0	0	0	1	0	1	2	0	1
sp|Q3UM45|PP1R7_MOUSE	Q3UM45	PP1R7_MOUSE	Ppp1r7	361	16.1	Mus musculus OX=10090	1:Experimental evidence at protein level	Protein phosphatase 1 regulatory subunit 7	1	0.999	4	20	20	20	1	1	2	1	3	3	1	3	2	2	1	0	0	0	1	1	2	1	3	3	1	3	2	2	1	0	0	0	1	1	2	1	3	3	1
sp|Q3UMF0|COBL1_MOUSE	Q3UMF0	COBL1_MOUSE	Cobll1	1273	17.7	Mus musculus OX=10090	1:Experimental evidence at protein level	Cordon-bleu protein-like 1	1	0.999	18	50	50	50	2	1	2	4	8	18	11	3	0	1	0	0	0	0	2	1	2	4	8	18	11	3	0	1	0	0	0	0	2	1	2	4	8	18	11
sp|Q3UMU9|HDGR2_MOUSE	Q3UMU9	HDGR2_MOUSE	Hdgfl2	669	5.2	Mus musculus OX=10090	1:Experimental evidence at protein level	Hepatoma-derived growth factor-related protein 2	1	0.999	3	7	7	7	0	0	0	0	1	2	4	0	0	0	0	0	0	0	0	0	0	0	1	2	4	0	0	0	0	0	0	0	0	0	0	0	1	2	4
sp|Q3UN02|LCLT1_MOUSE	Q3UN02	LCLT1_MOUSE	Lclat1	376	8	Mus musculus OX=10090	1:Experimental evidence at protein level	Lysocardiolipin acyltransferase 1	1	0.999	3	9	9	9	1	1	0	1	2	1	1	1	0	1	0	0	0	0	1	1	0	1	2	1	1	1	0	1	0	0	0	0	1	1	0	1	2	1	1
sp|Q3UNX5|ACSM3_MOUSE	Q3UNX5	ACSM3_MOUSE	Acsm3	580	7.8	Mus musculus OX=10090	1:Experimental evidence at protein level	Acyl-coenzyme A synthetase ACSM3, mitochondrial	1	0.999	4	13	13	13	2	1	1	2	3	2	2	0	0	0	0	0	0	0	2	1	1	2	3	2	2	0	0	0	0	0	0	0	2	1	1	2	3	2	2
sp|Q3UNZ8|QORL2_MOUSE	Q3UNZ8	QORL2_MOUSE	Cryzl2	350	20.6	Mus musculus OX=10090	1:Experimental evidence at protein level	Quinone oxidoreductase-like protein 2	1	0.999	5	17	17	17	0	2	1	1	2	4	4	0	1	2	0	0	0	0	0	2	1	1	2	4	4	0	1	2	0	0	0	0	0	2	1	1	2	4	4
sp|Q3UP75|UD3A1_MOUSE	Q3UP75	UD3A1_MOUSE	Ugt3a1	523	13	Mus musculus OX=10090	1:Experimental evidence at protein level	UDP-glucuronosyltransferase 3A1	1	0.999	7	18	18	34	1	1	1	2	3	5	2	2	0	1	0	0	0	0	1	1	1	2	3	5	2	2	0	1	0	0	0	0	2	2	3	4	4	6	3
sp|Q3UPF5|ZCCHV_MOUSE	Q3UPF5	ZCCHV_MOUSE	Zc3hav1	946	14.7	Mus musculus OX=10090	1:Experimental evidence at protein level	Zinc finger CCCH-type antiviral protein 1	1	0.999	7	12	12	12	1	0	0	1	3	3	4	0	0	0	0	0	0	0	1	0	0	1	3	3	4	0	0	0	0	0	0	0	1	0	0	1	3	3	4
sp|Q3UPL0|SC31A_MOUSE	Q3UPL0	SC31A_MOUSE	Sec31a	1230	22	Mus musculus OX=10090	1:Experimental evidence at protein level	Protein transport protein Sec31A	1	0.999	24	137	137	137	12	10	11	12	20	15	15	13	11	14	2	0	1	1	12	10	11	12	20	15	15	13	11	14	2	0	1	1	12	10	11	12	20	15	15
sp|Q3URD3|SLMAP_MOUSE	Q3URD3	SLMAP_MOUSE	Slmap	845	5.3	Mus musculus OX=10090	1:Experimental evidence at protein level	Sarcolemmal membrane-associated protein	1	0.999	2	10	10	10	1	1	0	0	1	3	2	1	0	1	0	0	0	0	1	1	0	0	1	3	2	1	0	1	0	0	0	0	1	1	0	0	1	3	2
sp|Q3URE1|ACSF3_MOUSE	Q3URE1	ACSF3_MOUSE	Acsf3	583	20.4	Mus musculus OX=10090	1:Experimental evidence at protein level	Malonate--CoA ligase ACSF3, mitochondrial	1	0.999	10	30	30	30	0	2	1	2	6	7	7	1	2	1	0	0	1	0	0	2	1	2	6	7	7	1	2	1	0	0	1	0	0	2	1	2	6	7	7
sp|Q3URS9|MITOK_MOUSE	Q3URS9	MITOK_MOUSE	Ccdc51	406	17.7	Mus musculus OX=10090	1:Experimental evidence at protein level	Mitochondrial potassium channel	1	0.999	4	9	9	9	0	1	0	0	4	2	2	0	0	0	0	0	0	0	0	1	0	0	4	2	2	0	0	0	0	0	0	0	0	1	0	0	4	2	2
sp|Q3UTJ2|SRBS2_MOUSE	Q3UTJ2	SRBS2_MOUSE	Sorbs2	1180	15.4	Mus musculus OX=10090	1:Experimental evidence at protein level	Sorbin and SH3 domain-containing protein 2	1	0.999	12	21	21	21	0	0	0	0	6	2	10	0	2	1	0	0	0	0	0	0	0	0	6	2	10	0	2	1	0	0	0	0	0	0	0	0	6	2	10
sp|Q3UZ39|LRRF1_MOUSE	Q3UZ39	LRRF1_MOUSE	Lrrfip1	729	9.3	Mus musculus OX=10090	1:Experimental evidence at protein level	Leucine-rich repeat flightless-interacting protein 1	1	0.999	3	5	5	8	0	0	0	0	3	1	1	0	0	0	0	0	0	0	0	0	0	0	3	1	1	0	0	0	0	0	0	0	0	0	0	0	4	2	2
sp|Q3V3R4|ITA1_MOUSE	Q3V3R4	ITA1_MOUSE	Itga1	1179	6	Mus musculus OX=10090	1:Experimental evidence at protein level	Integrin alpha-1	1	0.999	5	11	11	11	1	2	0	0	3	2	3	0	0	0	0	0	0	0	1	2	0	0	3	2	3	0	0	0	0	0	0	0	1	2	0	0	3	2	3
sp|Q4KMM3|OXR1_MOUSE	Q4KMM3	OXR1_MOUSE	Oxr1	866	6.2	Mus musculus OX=10090	1:Experimental evidence at protein level	Oxidation resistance protein 1	1	0.999	4	9	9	9	0	0	0	0	3	3	3	0	0	0	0	0	0	0	0	0	0	0	3	3	3	0	0	0	0	0	0	0	0	0	0	0	3	3	3
sp|Q4LDG0|S27A5_MOUSE	Q4LDG0	S27A5_MOUSE	Slc27a5	689	44.3	Mus musculus OX=10090	1:Experimental evidence at protein level	Bile acyl-CoA synthetase	1	0.999	28	202	202	202	13	12	14	15	30	22	30	12	15	15	6	4	6	8	13	12	14	15	30	22	30	12	15	15	6	4	6	8	13	12	14	15	30	22	30
sp|Q4PJX1|ODR4_MOUSE	Q4PJX1	ODR4_MOUSE	Odr4	447	8.5	Mus musculus OX=10090	1:Experimental evidence at protein level	Protein odr-4 homolog	1	0.999	3	7	7	7	0	0	0	0	3	2	2	0	0	0	0	0	0	0	0	0	0	0	3	2	2	0	0	0	0	0	0	0	0	0	0	0	3	2	2
sp|Q4PZA2|ECE1_MOUSE	Q4PZA2	ECE1_MOUSE	Ece1	769	5.7	Mus musculus OX=10090	1:Experimental evidence at protein level	Endothelin-converting enzyme 1	1	0.9958	5	7	7	7	0	0	0	1	3	1	1	0	0	1	0	0	0	0	0	0	0	1	3	1	1	0	0	1	0	0	0	0	0	0	0	1	3	1	1
sp|Q4VAA2|CDV3_MOUSE	Q4VAA2	CDV3_MOUSE	Cdv3	281	32.4	Mus musculus OX=10090	1:Experimental evidence at protein level	Protein CDV3	1	0.999	6	30	30	30	3	4	3	4	6	3	4	1	1	1	0	0	0	0	3	4	3	4	6	3	4	1	1	1	0	0	0	0	3	4	3	4	6	3	4
sp|Q501J6|DDX17_MOUSE	Q501J6	DDX17_MOUSE	Ddx17	650	21.1	Mus musculus OX=10090	1:Experimental evidence at protein level	Probable ATP-dependent RNA helicase DDX17	1	0.999	14	27	27	54	3	1	1	0	8	6	5	2	0	1	0	0	0	0	3	1	1	0	8	6	5	2	0	1	0	0	0	0	3	2	2	1	12	9	10
sp|Q505F5|LRC47_MOUSE	Q505F5	LRC47_MOUSE	Lrrc47	581	18.8	Mus musculus OX=10090	1:Experimental evidence at protein level	Leucine-rich repeat-containing protein 47	1	0.999	8	13	13	13	0	1	0	0	2	3	5	1	0	1	0	0	0	0	0	1	0	0	2	3	5	1	0	1	0	0	0	0	0	1	0	0	2	3	5
sp|Q52KI8|SRRM1_MOUSE	Q52KI8	SRRM1_MOUSE	Srrm1	946	3.6	Mus musculus OX=10090	1:Experimental evidence at protein level	Serine/arginine repetitive matrix protein 1	1	0.999	2	4	4	4	0	0	0	0	2	1	1	0	0	0	0	0	0	0	0	0	0	0	2	1	1	0	0	0	0	0	0	0	0	0	0	0	2	1	1
sp|Q569Z5|DDX46_MOUSE	Q569Z5	DDX46_MOUSE	Ddx46	1032	3.6	Mus musculus OX=10090	1:Experimental evidence at protein level	Probable ATP-dependent RNA helicase DDX46	1	0.999	3	6	6	6	0	0	0	0	3	1	1	0	1	0	0	0	0	0	0	0	0	0	3	1	1	0	1	0	0	0	0	0	0	0	0	0	3	1	1
sp|Q569Z6|TR150_MOUSE	Q569Z6	TR150_MOUSE	Thrap3	951	14.9	Mus musculus OX=10090	1:Experimental evidence at protein level	Thyroid hormone receptor-associated protein 3	1	0.999	9	38	38	38	4	3	2	2	8	3	5	2	3	6	0	0	0	0	4	3	2	2	8	3	5	2	3	6	0	0	0	0	4	3	2	2	8	3	5
sp|Q571F8|GLSL_MOUSE	Q571F8	GLSL_MOUSE	Gls2	602	37	Mus musculus OX=10090	1:Experimental evidence at protein level	Glutaminase liver isoform, mitochondrial	1	0.999	14	87	87	87	7	7	8	1	17	8	13	0	11	8	2	0	2	3	7	7	8	1	17	8	13	0	11	8	2	0	2	3	7	7	8	1	17	8	13
sp|Q571I9|A16A1_MOUSE	Q571I9	A16A1_MOUSE	Aldh16a1	802	23.7	Mus musculus OX=10090	1:Experimental evidence at protein level	Aldehyde dehydrogenase family 16 member A1	1	0.999	15	80	80	80	9	10	7	7	10	10	13	2	7	4	1	0	0	0	9	10	7	7	10	10	13	2	7	4	1	0	0	0	9	10	7	7	10	10	13
sp|Q58A65|JIP4_MOUSE	Q58A65	JIP4_MOUSE	Spag9	1321	3.2	Mus musculus OX=10090	1:Experimental evidence at protein level	C-Jun-amino-terminal kinase-interacting protein 4	1	0.999	4	11	11	11	0	0	0	0	4	3	4	0	0	0	0	0	0	0	0	0	0	0	4	3	4	0	0	0	0	0	0	0	0	0	0	0	4	3	4
sp|Q59J78|NDUF2_MOUSE	Q59J78	NDUF2_MOUSE	Ndufaf2	168	31	Mus musculus OX=10090	1:Experimental evidence at protein level	NADH dehydrogenase [ubiquinone] 1 alpha subcomplex assembly factor 2	1	0.999	4	9	9	9	0	1	0	0	2	4	2	0	0	0	0	0	0	0	0	1	0	0	2	4	2	0	0	0	0	0	0	0	0	1	0	0	2	4	2
sp|Q5BL07|PEX1_MOUSE	Q5BL07	PEX1_MOUSE	Pex1	1284	3.5	Mus musculus OX=10090	1:Experimental evidence at protein level	Peroxisome biogenesis factor 1	1	0.999	4	8	8	8	0	0	0	0	2	3	3	0	0	0	0	0	0	0	0	0	0	0	2	3	3	0	0	0	0	0	0	0	0	0	0	0	2	3	3
sp|Q5EBG8|CA050_MOUSE	Q5EBG8	CA050_MOUSE		199	13.6	Mus musculus OX=10090	1:Experimental evidence at protein level	Uncharacterized protein C1orf50 homolog	1	0.999	2	10	10	10	1	1	1	0	1	2	1	1	1	1	0	0	0	0	1	1	1	0	1	2	1	1	1	1	0	0	0	0	1	1	1	0	1	2	1
sp|Q5FW57|GLYAL_MOUSE	Q5FW57	GLYAL_MOUSE	Gm4952	296	63.5	Mus musculus OX=10090	1:Experimental evidence at protein level	Glycine N-acyltransferase-like protein	1	0.999	19	109	109	128	5	6	10	12	12	15	13	12	12	10	1	0	0	1	5	6	10	12	12	15	13	12	12	10	1	0	0	1	7	8	12	14	14	17	15
sp|Q5HZI1|MTUS1_MOUSE	Q5HZI1	MTUS1_MOUSE	Mtus1	1210	6.5	Mus musculus OX=10090	1:Experimental evidence at protein level	Microtubule-associated tumor suppressor 1 homolog	1	0.999	5	8	8	8	0	0	0	0	3	5	0	0	0	0	0	0	0	0	0	0	0	0	3	5	0	0	0	0	0	0	0	0	0	0	0	0	3	5	0
sp|Q5RKZ7|MOCS1_MOUSE	Q5RKZ7	MOCS1_MOUSE	Mocs1	636	3.1	Mus musculus OX=10090	1:Experimental evidence at protein level	Molybdenum cofactor biosynthesis protein 1	1	0.999	2	6	6	6	0	1	0	0	2	1	1	0	0	1	0	0	0	0	0	1	0	0	2	1	1	0	0	1	0	0	0	0	0	1	0	0	2	1	1
sp|Q5RL79|KTAP2_MOUSE	Q5RL79	KTAP2_MOUSE	Krtcap2	136	19.9	Mus musculus OX=10090	1:Experimental evidence at protein level	Keratinocyte-associated protein 2	1	0.999	1	3	3	3	0	0	0	0	3	0	0	0	0	0	0	0	0	0	0	0	0	0	3	0	0	0	0	0	0	0	0	0	0	0	0	0	3	0	0
sp|Q5SSH7|ZZEF1_MOUSE	Q5SSH7	ZZEF1_MOUSE	Zzef1	2924	1.7	Mus musculus OX=10090	1:Experimental evidence at protein level	Zinc finger ZZ-type and EF-hand domain-containing protein 1	1	0.999	4	6	6	6	0	0	0	0	2	3	1	0	0	0	0	0	0	0	0	0	0	0	2	3	1	0	0	0	0	0	0	0	0	0	0	0	2	3	1
sp|Q5SUC9|SCO1_MOUSE	Q5SUC9	SCO1_MOUSE	Sco1	284	8.5	Mus musculus OX=10090	1:Experimental evidence at protein level	Protein SCO1 homolog, mitochondrial	1	0.999	3	8	8	8	1	1	1	0	1	1	1	0	1	1	0	0	0	0	1	1	1	0	1	1	1	0	1	1	0	0	0	0	1	1	1	0	1	1	1
sp|Q5SUF2|LC7L3_MOUSE	Q5SUF2	LC7L3_MOUSE	Luc7l3	432	20.6	Mus musculus OX=10090	1:Experimental evidence at protein level	Luc7-like protein 3	1	0.999	6	16	16	16	0	0	0	0	4	5	4	0	1	2	0	0	0	0	0	0	0	0	4	5	4	0	1	2	0	0	0	0	0	0	0	0	4	5	4
sp|Q5SW19|CLU_MOUSE	Q5SW19	CLU_MOUSE	Cluh	1315	21.5	Mus musculus OX=10090	1:Experimental evidence at protein level	Clustered mitochondria protein homolog	1	0.999	25	113	113	113	8	8	10	9	20	21	16	7	7	7	0	0	0	0	8	8	10	9	20	21	16	7	7	7	0	0	0	0	8	8	10	9	20	21	16
sp|Q5SWU9|ACACA_MOUSE	Q5SWU9	ACACA_MOUSE	Acaca	2345	17.4	Mus musculus OX=10090	1:Experimental evidence at protein level	Acetyl-CoA carboxylase 1	1	0.999	30	111	91	111	9	8	7	5	22	17	20	4	9	7	2	0	0	1	8	7	6	4	19	13	16	3	8	6	1	0	0	0	9	8	7	5	22	17	20
sp|Q5U458|DJC11_MOUSE	Q5U458	DJC11_MOUSE	Dnajc11	559	6.1	Mus musculus OX=10090	1:Experimental evidence at protein level	DnaJ homolog subfamily C member 11	1	0.999	3	6	6	6	0	0	0	0	2	2	2	0	0	0	0	0	0	0	0	0	0	0	2	2	2	0	0	0	0	0	0	0	0	0	0	0	2	2	2
sp|Q5U5V2|HYKK_MOUSE	Q5U5V2	HYKK_MOUSE	Hykk	376	20.2	Mus musculus OX=10090	1:Experimental evidence at protein level	Hydroxylysine kinase	1	0.999	7	30	30	30	2	2	1	2	6	4	4	4	2	3	0	0	0	0	2	2	1	2	6	4	4	4	2	3	0	0	0	0	2	2	1	2	6	4	4
sp|Q5XG73|ACBD5_MOUSE	Q5XG73	ACBD5_MOUSE	Acbd5	508	28.9	Mus musculus OX=10090	1:Experimental evidence at protein level	Acyl-CoA-binding domain-containing protein 5	1	0.999	10	61	61	61	5	4	5	4	7	8	9	4	5	5	1	0	1	3	5	4	5	4	7	8	9	4	5	5	1	0	1	3	5	4	5	4	7	8	9
sp|Q5XJY5|COPD_MOUSE	Q5XJY5	COPD_MOUSE	Arcn1	511	30.5	Mus musculus OX=10090	1:Experimental evidence at protein level	Coatomer subunit delta	1	0.999	16	65	65	65	6	3	2	2	10	11	13	4	6	6	1	0	0	1	6	3	2	2	10	11	13	4	6	6	1	0	0	1	6	3	2	2	10	11	13
sp|Q5XKN4|JAGN1_MOUSE	Q5XKN4	JAGN1_MOUSE	Jagn1	183	13.1	Mus musculus OX=10090	1:Experimental evidence at protein level	Protein jagunal homolog 1	1	0.999	2	3	3	3	0	0	0	0	1	2	0	0	0	0	0	0	0	0	0	0	0	0	1	2	0	0	0	0	0	0	0	0	0	0	0	0	1	2	0
sp|Q60597|ODO1_MOUSE	Q60597	ODO1_MOUSE	Ogdh	1023	43.2	Mus musculus OX=10090	1:Experimental evidence at protein level	2-oxoglutarate dehydrogenase, mitochondrial	1	0.999	35	197	197	197	15	15	12	8	30	27	26	12	19	18	6	1	5	3	15	15	12	8	30	27	26	12	19	18	6	1	5	3	15	15	12	8	30	27	26
sp|Q60598|SRC8_MOUSE	Q60598	SRC8_MOUSE	Cttn	546	27.3	Mus musculus OX=10090	1:Experimental evidence at protein level	Src substrate cortactin	1	0.999	14	50	50	50	2	5	3	4	10	8	10	3	2	3	0	0	0	0	2	5	3	4	10	8	10	3	2	3	0	0	0	0	2	5	3	4	10	8	10
sp|Q60634|FLOT2_MOUSE	Q60634	FLOT2_MOUSE	Flot2	428	11.2	Mus musculus OX=10090	1:Experimental evidence at protein level	Flotillin-2	1	0.999	4	14	14	14	1	1	0	1	2	4	5	0	0	0	0	0	0	0	1	1	0	1	2	4	5	0	0	0	0	0	0	0	1	1	0	1	2	4	5
sp|Q60649|CLPB_MOUSE	Q60649	CLPB_MOUSE	Clpb	677	6.4	Mus musculus OX=10090	1:Experimental evidence at protein level	Caseinolytic peptidase B protein homolog	1	0.999	3	8	8	8	0	0	0	1	1	2	2	0	1	0	0	0	1	0	0	0	0	1	1	2	2	0	1	0	0	0	1	0	0	0	0	1	1	2	2
sp|Q60692|PSB6_MOUSE	Q60692	PSB6_MOUSE	Psmb6	238	20.6	Mus musculus OX=10090	1:Experimental evidence at protein level	Proteasome subunit beta type-6	1	0.999	5	51	51	51	4	4	4	4	3	4	4	5	2	5	4	3	3	2	4	4	4	4	3	4	4	5	2	5	4	3	3	2	4	4	4	4	3	4	4
sp|Q60710|SAMH1_MOUSE	Q60710	SAMH1_MOUSE	Samhd1	658	9.9	Mus musculus OX=10090	1:Experimental evidence at protein level	Deoxynucleoside triphosphate triphosphohydrolase SAMHD1	1	0.999	4	11	11	11	1	1	0	1	2	2	3	0	0	1	0	0	0	0	1	1	0	1	2	2	3	0	0	1	0	0	0	0	1	1	0	1	2	2	3
sp|Q60737|CSK21_MOUSE	Q60737	CSK21_MOUSE	Csnk2a1	391	5.6	Mus musculus OX=10090	1:Experimental evidence at protein level	Casein kinase II subunit alpha	1	0.999	2	9	9	9	0	0	0	1	2	1	2	1	1	1	0	0	0	0	0	0	0	1	2	1	2	1	1	1	0	0	0	0	0	0	0	1	2	1	2
sp|Q60738|ZNT1_MOUSE	Q60738	ZNT1_MOUSE	Slc30a1	503	4.8	Mus musculus OX=10090	1:Experimental evidence at protein level	Zinc transporter 1	1	0.999	2	4	4	4	0	0	0	0	1	2	1	0	0	0	0	0	0	0	0	0	0	0	1	2	1	0	0	0	0	0	0	0	0	0	0	0	1	2	1
sp|Q60759|GCDH_MOUSE	Q60759	GCDH_MOUSE	Gcdh	438	49.3	Mus musculus OX=10090	1:Experimental evidence at protein level	Glutaryl-CoA dehydrogenase, mitochondrial	1	0.999	19	221	221	221	17	14	16	14	31	24	26	13	15	14	10	9	9	9	17	14	16	14	31	24	26	13	15	14	10	9	9	9	17	14	16	14	31	24	26
sp|Q60766|IRGM1_MOUSE	Q60766	IRGM1_MOUSE	Irgm1	409	16.6	Mus musculus OX=10090	1:Experimental evidence at protein level	Immunity-related GTPase family M protein 1	1	0.999	7	37	37	37	3	2	3	4	4	4	5	4	2	4	0	0	1	1	3	2	3	4	4	4	5	4	2	4	0	0	1	1	3	2	3	4	4	4	5
sp|Q60854|SPB6_MOUSE	Q60854	SPB6_MOUSE	Serpinb6	378	19	Mus musculus OX=10090	1:Experimental evidence at protein level	Serpin B6	1	0.999	7	17	17	17	1	0	1	1	5	3	2	1	1	2	0	0	0	0	1	0	1	1	5	3	2	1	1	2	0	0	0	0	1	0	1	1	5	3	2
sp|Q60864|STIP1_MOUSE	Q60864	STIP1_MOUSE	Stip1	543	40.9	Mus musculus OX=10090	1:Experimental evidence at protein level	Stress-induced-phosphoprotein 1	1	0.999	25	147	147	147	10	9	11	13	20	24	14	14	9	13	3	3	2	2	10	9	11	13	20	24	14	14	9	13	3	3	2	2	10	9	11	13	20	24	14
sp|Q60865|CAPR1_MOUSE	Q60865	CAPR1_MOUSE	Caprin1	707	15.8	Mus musculus OX=10090	1:Experimental evidence at protein level	Caprin-1	1	0.999	9	46	46	46	4	3	3	6	5	7	5	5	2	6	0	0	0	0	4	3	3	6	5	7	5	5	2	6	0	0	0	0	4	3	3	6	5	7	5
sp|Q60866|PTER_MOUSE	Q60866	PTER_MOUSE	Pter	349	19.5	Mus musculus OX=10090	1:Experimental evidence at protein level	Phosphotriesterase-related protein	1	0.999	5	21	21	21	1	1	1	1	4	2	4	2	3	2	0	0	0	0	1	1	1	1	4	2	4	2	3	2	0	0	0	0	1	1	1	1	4	2	4
sp|Q60872|IF1A_MOUSE	Q60872	IF1A_MOUSE	Eif1a	144	22.9	Mus musculus OX=10090	2:Experimental evidence at transcript level	Eukaryotic translation initiation factor 1A	1	0.999	4	24	0	24	2	2	2	1	4	4	3	2	2	2	0	0	0	0	0	0	0	0	0	0	0	0	0	0	0	0	0	0	2	2	2	1	4	4	3
sp|Q60902|EP15R_MOUSE	Q60902	EP15R_MOUSE	Eps15l1	907	9.6	Mus musculus OX=10090	1:Experimental evidence at protein level	Epidermal growth factor receptor substrate 15-like 1	1	0.999	4	12	12	12	0	0	0	0	4	3	3	1	1	0	0	0	0	0	0	0	0	0	4	3	3	1	1	0	0	0	0	0	0	0	0	0	4	3	3
sp|Q60930|VDAC2_MOUSE	Q60930	VDAC2_MOUSE	Vdac2	295	45.1	Mus musculus OX=10090	1:Experimental evidence at protein level	Voltage-dependent anion-selective channel protein 2	1	0.999	11	95	95	95	7	7	7	6	14	9	10	6	5	7	3	4	5	5	7	7	7	6	14	9	10	6	5	7	3	4	5	5	7	7	7	6	14	9	10
sp|Q60931|VDAC3_MOUSE	Q60931	VDAC3_MOUSE	Vdac3	283	48.8	Mus musculus OX=10090	1:Experimental evidence at protein level	Voltage-dependent anion-selective channel protein 3	1	0.999	10	98	98	98	8	7	6	8	14	10	10	5	7	6	4	3	4	6	8	7	6	8	14	10	10	5	7	6	4	3	4	6	8	7	6	8	14	10	10
sp|Q60932|VDAC1_MOUSE	Q60932	VDAC1_MOUSE	Vdac1	296	65.2	Mus musculus OX=10090	1:Experimental evidence at protein level	Voltage-dependent anion-selective channel protein 1	1	0.999	16	167	167	167	12	13	17	12	18	15	14	9	10	11	11	7	9	9	12	13	17	12	18	15	14	9	10	11	11	7	9	9	12	13	17	12	18	15	14
sp|Q60936|COQ8A_MOUSE	Q60936	COQ8A_MOUSE	Coq8a	645	29	Mus musculus OX=10090	1:Experimental evidence at protein level	Atypical kinase COQ8A, mitochondrial	1	0.999	14	67	67	67	6	4	4	5	10	10	10	3	6	5	2	1	1	0	6	4	4	5	10	10	10	3	6	5	2	1	1	0	6	4	4	5	10	10	10
sp|Q61009|SCRB1_MOUSE	Q61009	SCRB1_MOUSE	Scarb1	509	10.4	Mus musculus OX=10090	1:Experimental evidence at protein level	Scavenger receptor class B member 1	1	0.999	4	11	11	11	1	0	0	1	1	1	3	1	2	1	0	0	0	0	1	0	0	1	1	1	3	1	2	1	0	0	0	0	1	0	0	1	1	1	3
sp|Q61029|LAP2B_MOUSE	Q61029	LAP2B_MOUSE	Tmpo	452	31.4	Mus musculus OX=10090	1:Experimental evidence at protein level	Lamina-associated polypeptide 2, isoforms beta/delta/epsilon/gamma	1	0.999	9	29	9	29	1	1	1	1	8	7	6	0	2	2	0	0	0	0	0	1	1	0	1	2	2	0	1	1	0	0	0	0	1	1	1	1	8	7	6
sp|Q61081|CDC37_MOUSE	Q61081	CDC37_MOUSE	Cdc37	379	12.4	Mus musculus OX=10090	1:Experimental evidence at protein level	Hsp90 co-chaperone Cdc37	1	0.999	4	15	15	15	0	0	0	0	4	2	3	1	3	2	0	0	0	0	0	0	0	0	4	2	3	1	3	2	0	0	0	0	0	0	0	0	4	2	3
sp|Q61102|ABCB7_MOUSE	Q61102	ABCB7_MOUSE	Abcb7	752	5.7	Mus musculus OX=10090	1:Experimental evidence at protein level	Iron-sulfur clusters transporter ABCB7, mitochondrial	1	0.999	5	12	12	12	0	1	0	1	4	2	1	0	2	1	0	0	0	0	0	1	0	1	4	2	1	0	2	1	0	0	0	0	0	1	0	1	4	2	1
sp|Q61133|GSTT2_MOUSE	Q61133	GSTT2_MOUSE	Gstt2	244	33.2	Mus musculus OX=10090	1:Experimental evidence at protein level	Glutathione S-transferase theta-2	1	0.999	8	41	41	50	3	3	3	4	6	4	3	4	5	4	1	0	1	0	3	3	3	4	6	4	3	4	5	4	1	0	1	0	3	3	3	5	7	5	4
sp|Q61147|CERU_MOUSE	Q61147	CERU_MOUSE	Cp	1061	6.2	Mus musculus OX=10090	1:Experimental evidence at protein level	Ceruloplasmin	1	0.999	6	12	12	12	0	0	0	1	4	3	3	0	1	0	0	0	0	0	0	0	0	1	4	3	3	0	1	0	0	0	0	0	0	0	0	1	4	3	3
sp|Q61166|MARE1_MOUSE	Q61166	MARE1_MOUSE	Mapre1	268	19.8	Mus musculus OX=10090	1:Experimental evidence at protein level	Microtubule-associated protein RP/EB family member 1	1	0.999	4	12	12	12	0	0	0	0	4	3	2	1	1	1	0	0	0	0	0	0	0	0	4	3	2	1	1	1	0	0	0	0	0	0	0	0	4	3	2
sp|Q61171|PRDX2_MOUSE	Q61171	PRDX2_MOUSE	Prdx2	198	43.9	Mus musculus OX=10090	1:Experimental evidence at protein level	Peroxiredoxin-2	1	0.999	9	97	83	97	8	8	7	7	8	8	8	6	7	7	6	5	6	6	7	7	6	6	7	7	7	5	6	6	5	4	5	5	8	8	7	7	8	8	8
sp|Q61176|ARGI1_MOUSE	Q61176	ARGI1_MOUSE	Arg1	323	71.8	Mus musculus OX=10090	1:Experimental evidence at protein level	Arginase-1	1	0.999	20	218	218	218	19	18	20	16	26	18	19	10	14	12	11	9	13	13	19	18	20	16	26	18	19	10	14	12	11	9	13	13	19	18	20	16	26	18	19
sp|Q61187|TS101_MOUSE	Q61187	TS101_MOUSE	Tsg101	391	13.8	Mus musculus OX=10090	1:Experimental evidence at protein level	Tumor susceptibility gene 101 protein	1	0.9982	4	4	4	4	0	1	0	0	0	0	1	0	1	1	0	0	0	0	0	1	0	0	0	0	1	0	1	1	0	0	0	0	0	1	0	0	0	0	1
sp|Q61207|SAP_MOUSE	Q61207	SAP_MOUSE	Psap	557	3.8	Mus musculus OX=10090	1:Experimental evidence at protein level	Prosaposin	1	0.999	2	6	6	6	0	0	0	1	0	0	0	2	1	2	0	0	0	0	0	0	0	1	0	0	0	2	1	2	0	0	0	0	0	0	0	1	0	0	0
sp|Q61233|PLSL_MOUSE	Q61233	PLSL_MOUSE	Lcp1	627	43.5	Mus musculus OX=10090	1:Experimental evidence at protein level	Plastin-2	1	0.999	24	95	95	117	7	8	4	6	18	13	13	6	6	7	1	1	3	2	7	8	4	6	18	13	13	6	6	7	1	1	3	2	9	10	5	7	20	16	15
sp|Q61247|A2AP_MOUSE	Q61247	A2AP_MOUSE	Serpinf2	491	8.4	Mus musculus OX=10090	1:Experimental evidence at protein level	Alpha-2-antiplasmin	1	0.999	3	9	9	9	0	0	0	0	3	3	2	0	1	0	0	0	0	0	0	0	0	0	3	3	2	0	1	0	0	0	0	0	0	0	0	0	3	3	2
sp|Q61285|ABCD2_MOUSE	Q61285	ABCD2_MOUSE	Abcd2	741	11.1	Mus musculus OX=10090	1:Experimental evidence at protein level	ATP-binding cassette sub-family D member 2	1	0.999	8	25	25	25	1	1	1	2	7	3	5	1	2	2	0	0	0	0	1	1	1	2	7	3	5	1	2	2	0	0	0	0	1	1	1	2	7	3	5
sp|Q61335|BAP31_MOUSE	Q61335	BAP31_MOUSE	Bcap31	245	25.3	Mus musculus OX=10090	1:Experimental evidence at protein level	B-cell receptor-associated protein 31	1	0.999	11	83	83	83	5	5	6	7	9	10	11	6	9	6	2	2	3	2	5	5	6	7	9	10	11	6	9	6	2	2	3	2	5	5	6	7	9	10	11
sp|Q61419|CMAH_MOUSE	Q61419	CMAH_MOUSE	Cmah	577	5.2	Mus musculus OX=10090	1:Experimental evidence at protein level	Cytidine monophosphate-N-acetylneuraminic acid hydroxylase	1	0.999	3	5	5	5	0	0	0	0	2	1	2	0	0	0	0	0	0	0	0	0	0	0	2	1	2	0	0	0	0	0	0	0	0	0	0	0	2	1	2
sp|Q61425|HCDH_MOUSE	Q61425	HCDH_MOUSE	Hadh	314	58.6	Mus musculus OX=10090	1:Experimental evidence at protein level	Hydroxyacyl-coenzyme A dehydrogenase, mitochondrial	1	0.999	19	175	175	175	13	13	17	16	15	14	13	12	12	12	10	6	10	12	13	13	17	16	15	14	13	12	12	12	10	6	10	12	13	13	17	16	15	14	13
sp|Q61490|CD166_MOUSE	Q61490	CD166_MOUSE	Alcam	583	10.6	Mus musculus OX=10090	1:Experimental evidence at protein level	CD166 antigen	1	0.999	5	13	13	13	1	0	0	0	4	3	2	0	1	1	0	0	0	1	1	0	0	0	4	3	2	0	1	1	0	0	0	1	1	0	0	0	4	3	2
sp|Q61510|TRI25_MOUSE	Q61510	TRI25_MOUSE	Trim25	634	4.1	Mus musculus OX=10090	1:Experimental evidence at protein level	E3 ubiquitin/ISG15 ligase TRIM25	1	0.999	2	4	4	4	0	0	0	0	1	1	2	0	0	0	0	0	0	0	0	0	0	0	1	1	2	0	0	0	0	0	0	0	0	0	0	0	1	1	2
sp|Q61543|GSLG1_MOUSE	Q61543	GSLG1_MOUSE	Glg1	1175	3.6	Mus musculus OX=10090	1:Experimental evidence at protein level	Golgi apparatus protein 1	1	0.999	3	4	4	4	0	0	0	0	2	2	0	0	0	0	0	0	0	0	0	0	0	0	2	2	0	0	0	0	0	0	0	0	0	0	0	0	2	2	0
sp|Q61545|EWS_MOUSE	Q61545	EWS_MOUSE	Ewsr1	655	12.4	Mus musculus OX=10090	1:Experimental evidence at protein level	RNA-binding protein EWS	1	0.999	3	16	16	16	2	1	0	1	3	4	2	0	0	1	0	0	0	2	2	1	0	1	3	4	2	0	0	1	0	0	0	2	2	1	0	1	3	4	2
sp|Q61578|ADRO_MOUSE	Q61578	ADRO_MOUSE	Fdxr	494	20.2	Mus musculus OX=10090	1:Experimental evidence at protein level	NADPH:adrenodoxin oxidoreductase, mitochondrial	1	0.999	9	36	36	36	1	1	3	2	6	5	7	3	5	3	0	0	0	0	1	1	3	2	6	5	7	3	5	3	0	0	0	0	1	1	3	2	6	5	7
sp|Q61584|FXR1_MOUSE	Q61584	FXR1_MOUSE	Fxr1	677	15.7	Mus musculus OX=10090	1:Experimental evidence at protein level	Fragile X mental retardation syndrome-related protein 1	1	0.999	7	15	9	15	1	1	1	0	4	1	3	0	1	3	0	0	0	0	0	0	0	0	4	1	2	0	0	2	0	0	0	0	1	1	1	0	4	1	3
sp|Q61586|GPAT1_MOUSE	Q61586	GPAT1_MOUSE	Gpam	827	12.3	Mus musculus OX=10090	1:Experimental evidence at protein level	Glycerol-3-phosphate acyltransferase 1, mitochondrial	1	0.999	6	16	16	16	0	0	0	1	6	5	3	0	0	1	0	0	0	0	0	0	0	1	6	5	3	0	0	1	0	0	0	0	0	0	0	1	6	5	3
sp|Q61598|GDIB_MOUSE	Q61598	GDIB_MOUSE	Gdi2	445	70.8	Mus musculus OX=10090	1:Experimental evidence at protein level	Rab GDP dissociation inhibitor beta	1	0.999	29	160	127	160	11	12	14	14	17	16	18	13	15	13	3	4	6	4	9	10	11	11	13	13	15	10	12	10	2	3	5	3	11	12	14	14	17	16	18
sp|Q61646|HPT_MOUSE	Q61646	HPT_MOUSE	Hp	347	14.7	Mus musculus OX=10090	1:Experimental evidence at protein level	Haptoglobin	1	0.999	5	16	16	16	0	1	1	0	5	4	5	0	0	0	0	0	0	0	0	1	1	0	5	4	5	0	0	0	0	0	0	0	0	1	1	0	5	4	5
sp|Q61655|DD19A_MOUSE	Q61655	DD19A_MOUSE	Ddx19a	478	20.1	Mus musculus OX=10090	1:Experimental evidence at protein level	ATP-dependent RNA helicase DDX19A	1	0.999	4	11	8	11	0	0	1	1	2	2	2	0	1	2	0	0	0	0	0	0	1	1	1	1	1	0	1	2	0	0	0	0	0	0	1	1	2	2	2
sp|Q61656|DDX5_MOUSE	Q61656	DDX5_MOUSE	Ddx5	614	29.8	Mus musculus OX=10090	1:Experimental evidence at protein level	Probable ATP-dependent RNA helicase DDX5	1	0.999	19	109	88	115	8	7	6	9	13	14	14	9	12	10	1	1	2	3	8	6	5	8	10	11	11	7	10	8	1	0	1	2	8	7	6	9	14	14	16
sp|Q61699|HS105_MOUSE	Q61699	HS105_MOUSE	Hsph1	858	17.5	Mus musculus OX=10090	1:Experimental evidence at protein level	Heat shock protein 105 kDa	1	0.999	15	51	51	60	4	3	2	4	9	10	9	3	3	4	0	0	0	0	4	3	2	4	9	10	9	3	3	4	0	0	0	0	5	4	3	5	10	11	10
sp|Q61702|ITIH1_MOUSE	Q61702	ITIH1_MOUSE	Itih1	907	8	Mus musculus OX=10090	1:Experimental evidence at protein level	Inter-alpha-trypsin inhibitor heavy chain H1	1	0.999	6	10	10	10	0	0	0	1	2	3	1	0	2	1	0	0	0	0	0	0	0	1	2	3	1	0	2	1	0	0	0	0	0	0	0	1	2	3	1
sp|Q61703|ITIH2_MOUSE	Q61703	ITIH2_MOUSE	Itih2	946	13.8	Mus musculus OX=10090	1:Experimental evidence at protein level	Inter-alpha-trypsin inhibitor heavy chain H2	1	0.999	10	34	34	34	0	2	1	1	7	6	9	3	1	4	0	0	0	0	0	2	1	1	7	6	9	3	1	4	0	0	0	0	0	2	1	1	7	6	9
sp|Q61733|RT31_MOUSE	Q61733	RT31_MOUSE	Mrps31	384	12	Mus musculus OX=10090	1:Experimental evidence at protein level	28S ribosomal protein S31, mitochondrial	1	0.9989	4	7	7	7	0	0	0	0	2	3	1	0	0	1	0	0	0	0	0	0	0	0	2	3	1	0	0	1	0	0	0	0	0	0	0	0	2	3	1
sp|Q61735|CD47_MOUSE	Q61735	CD47_MOUSE	Cd47	303	8.9	Mus musculus OX=10090	1:Experimental evidence at protein level	Leukocyte surface antigen CD47	1	0.999	2	5	5	5	0	0	0	0	1	1	2	0	1	0	0	0	0	0	0	0	0	0	1	1	2	0	1	0	0	0	0	0	0	0	0	0	1	1	2
sp|Q61749|EI2BD_MOUSE	Q61749	EI2BD_MOUSE	Eif2b4	524	10.5	Mus musculus OX=10090	1:Experimental evidence at protein level	Translation initiation factor eIF-2B subunit delta	1	0.999	4	7	7	7	0	0	0	0	1	2	2	1	1	0	0	0	0	0	0	0	0	0	1	2	2	1	1	0	0	0	0	0	0	0	0	0	1	2	2
sp|Q61792|LASP1_MOUSE	Q61792	LASP1_MOUSE	Lasp1	263	36.5	Mus musculus OX=10090	1:Experimental evidence at protein level	LIM and SH3 domain protein 1	1	0.999	12	67	67	67	5	6	6	6	8	8	8	6	7	6	1	0	0	0	5	6	6	6	8	8	8	6	7	6	1	0	0	0	5	6	6	6	8	8	8
sp|Q61823|PDCD4_MOUSE	Q61823	PDCD4_MOUSE	Pdcd4	469	10.2	Mus musculus OX=10090	1:Experimental evidence at protein level	Programmed cell death protein 4	1	0.999	5	23	23	23	0	2	2	1	6	4	6	0	1	1	0	0	0	0	0	2	2	1	6	4	6	0	1	1	0	0	0	0	0	2	2	1	6	4	6
sp|Q61830|MRC1_MOUSE	Q61830	MRC1_MOUSE	Mrc1	1456	4.1	Mus musculus OX=10090	1:Experimental evidence at protein level	Macrophage mannose receptor 1	1	0.999	6	18	18	18	0	0	0	1	4	5	5	0	2	1	0	0	0	0	0	0	0	1	4	5	5	0	2	1	0	0	0	0	0	0	0	1	4	5	5
sp|Q61937|NPM_MOUSE	Q61937	NPM_MOUSE	Npm1	292	28.8	Mus musculus OX=10090	1:Experimental evidence at protein level	Nucleophosmin	1	0.999	9	63	63	63	5	5	5	5	8	10	9	3	3	3	2	1	2	2	5	5	5	5	8	10	9	3	3	3	2	1	2	2	5	5	5	5	8	10	9
sp|Q62087|PON3_MOUSE	Q62087	PON3_MOUSE	Pon3	354	21.2	Mus musculus OX=10090	1:Experimental evidence at protein level	Serum paraoxonase/lactonase 3	1	0.999	6	64	64	64	5	5	5	5	8	6	7	7	6	6	3	1	0	0	5	5	5	5	8	6	7	7	6	6	3	1	0	0	5	5	5	5	8	6	7
sp|Q62093|SRSF2_MOUSE	Q62093	SRSF2_MOUSE	Srsf2	221	33.9	Mus musculus OX=10090	1:Experimental evidence at protein level	Serine/arginine-rich splicing factor 2	1	0.999	7	54	54	54	4	4	4	5	6	5	5	4	4	4	2	1	3	3	4	4	4	5	6	5	5	4	4	4	2	1	3	3	4	4	4	5	6	5	5
sp|Q62186|SSRD_MOUSE	Q62186	SSRD_MOUSE	Ssr4	172	36.6	Mus musculus OX=10090	1:Experimental evidence at protein level	Translocon-associated protein subunit delta	1	0.999	5	69	69	69	6	6	6	7	6	6	7	5	4	3	3	2	4	4	6	6	6	7	6	6	7	5	4	3	3	2	4	4	6	6	6	7	6	6	7
sp|Q62189|SNRPA_MOUSE	Q62189	SNRPA_MOUSE	Snrpa	287	6.3	Mus musculus OX=10090	1:Experimental evidence at protein level	U1 small nuclear ribonucleoprotein A	1	0.999	2	3	3	3	0	0	0	0	1	1	1	0	0	0	0	0	0	0	0	0	0	0	1	1	1	0	0	0	0	0	0	0	0	0	0	0	1	1	1
sp|Q62261|SPTB2_MOUSE	Q62261	SPTB2_MOUSE	Sptbn1	2363	23.4	Mus musculus OX=10090	1:Experimental evidence at protein level	Spectrin beta chain, non-erythrocytic 1	1	0.999	43	165	165	165	8	7	9	7	31	24	24	11	22	22	0	0	0	0	8	7	9	7	31	24	24	11	22	22	0	0	0	0	8	7	9	7	31	24	24
sp|Q62313|TGON1_MOUSE	Q62313	TGON1_MOUSE	Tgoln1	353	5.9	Mus musculus OX=10090	1:Experimental evidence at protein level	Trans-Golgi network integral membrane protein 1	1	0.999	2	5	5	5	0	1	0	0	1	1	2	0	0	0	0	0	0	0	0	1	0	0	1	1	2	0	0	0	0	0	0	0	0	1	0	0	1	1	2
sp|Q62318|TIF1B_MOUSE	Q62318	TIF1B_MOUSE	Trim28	834	10.4	Mus musculus OX=10090	1:Experimental evidence at protein level	Transcription intermediary factor 1-beta	1	0.999	6	12	12	12	0	1	0	2	1	2	3	0	1	2	0	0	0	0	0	1	0	2	1	2	3	0	1	2	0	0	0	0	0	1	0	2	1	2	3
sp|Q62348|TSN_MOUSE	Q62348	TSN_MOUSE	Tsn	228	33.8	Mus musculus OX=10090	1:Experimental evidence at protein level	Translin	1	0.999	6	22	22	22	2	3	1	2	3	4	5	0	1	1	0	0	0	0	2	3	1	2	3	4	5	0	1	1	0	0	0	0	2	3	1	2	3	4	5
sp|Q62351|TFR1_MOUSE	Q62351	TFR1_MOUSE	Tfrc	763	14.9	Mus musculus OX=10090	1:Experimental evidence at protein level	Transferrin receptor protein 1	1	0.999	8	13	13	13	0	0	0	0	5	4	4	0	0	0	0	0	0	0	0	0	0	0	5	4	4	0	0	0	0	0	0	0	0	0	0	0	5	4	4
sp|Q62376|RU17_MOUSE	Q62376	RU17_MOUSE	Snrnp70	448	16.1	Mus musculus OX=10090	1:Experimental evidence at protein level	U1 small nuclear ribonucleoprotein 70 kDa	1	0.999	8	29	29	29	2	2	3	3	1	4	8	3	1	2	0	0	0	0	2	2	3	3	1	4	8	3	1	2	0	0	0	0	2	2	3	3	1	4	8
sp|Q62384|ZPR1_MOUSE	Q62384	ZPR1_MOUSE	Zpr1	459	10.5	Mus musculus OX=10090	1:Experimental evidence at protein level	Zinc finger protein ZPR1	1	0.999	2	5	5	5	0	0	0	0	1	2	2	0	0	0	0	0	0	0	0	0	0	0	1	2	2	0	0	0	0	0	0	0	0	0	0	0	1	2	2
sp|Q62417|SRBS1_MOUSE	Q62417	SRBS1_MOUSE	Sorbs1	1290	7.4	Mus musculus OX=10090	1:Experimental evidence at protein level	Sorbin and SH3 domain-containing protein 1	1	0.999	5	13	13	13	0	0	0	0	5	4	4	0	0	0	0	0	0	0	0	0	0	0	5	4	4	0	0	0	0	0	0	0	0	0	0	0	5	4	4
sp|Q62418|DBNL_MOUSE	Q62418	DBNL_MOUSE	Dbnl	436	18.1	Mus musculus OX=10090	1:Experimental evidence at protein level	Drebrin-like protein	1	0.999	8	28	28	28	2	2	1	2	4	6	8	2	1	0	0	0	0	0	2	2	1	2	4	6	8	2	1	0	0	0	0	0	2	2	1	2	4	6	8
sp|Q62425|NDUA4_MOUSE	Q62425	NDUA4_MOUSE	Ndufa4	82	86.6	Mus musculus OX=10090	1:Experimental evidence at protein level	Cytochrome c oxidase subunit NDUFA4	1	0.999	8	72	72	72	6	5	6	5	7	6	8	4	5	6	4	3	3	4	6	5	6	5	7	6	8	4	5	6	4	3	3	4	6	5	6	5	7	6	8
sp|Q62433|NDRG1_MOUSE	Q62433	NDRG1_MOUSE	Ndrg1	394	11.9	Mus musculus OX=10090	1:Experimental evidence at protein level	Protein NDRG1	1	0.999	3	10	10	10	0	0	0	1	2	2	4	1	0	0	0	0	0	0	0	0	0	1	2	2	4	1	0	0	0	0	0	0	0	0	0	1	2	2	4
sp|Q62446|FKBP3_MOUSE	Q62446	FKBP3_MOUSE	Fkbp3	224	39.3	Mus musculus OX=10090	1:Experimental evidence at protein level	Peptidyl-prolyl cis-trans isomerase FKBP3	1	0.999	9	29	29	29	1	1	1	1	5	6	7	2	2	3	0	0	0	0	1	1	1	1	5	6	7	2	2	3	0	0	0	0	1	1	1	1	5	6	7
sp|Q62448|IF4G2_MOUSE	Q62448	IF4G2_MOUSE	Eif4g2	906	18.4	Mus musculus OX=10090	1:Experimental evidence at protein level	Eukaryotic translation initiation factor 4 gamma 2	1	0.999	10	18	18	18	1	1	1	1	6	4	3	1	0	0	0	0	0	0	1	1	1	1	6	4	3	1	0	0	0	0	0	0	1	1	1	1	6	4	3
sp|Q62465|VAT1_MOUSE	Q62465	VAT1_MOUSE	Vat1	406	15	Mus musculus OX=10090	1:Experimental evidence at protein level	Synaptic vesicle membrane protein VAT-1 homolog	1	0.999	5	10	10	10	0	0	0	0	5	2	3	0	0	0	0	0	0	0	0	0	0	0	5	2	3	0	0	0	0	0	0	0	0	0	0	0	5	2	3
sp|Q62523|ZYX_MOUSE	Q62523	ZYX_MOUSE	Zyx	564	5	Mus musculus OX=10090	1:Experimental evidence at protein level	Zyxin	1	0.999	2	4	4	4	0	0	0	0	3	0	1	0	0	0	0	0	0	0	0	0	0	0	3	0	1	0	0	0	0	0	0	0	0	0	0	0	3	0	1
sp|Q63880|EST3A_MOUSE	Q63880	EST3A_MOUSE	Ces3a	571	39.1	Mus musculus OX=10090	1:Experimental evidence at protein level	Carboxylesterase 3A	1	0.999	18	211	86	211	13	17	16	17	19	24	24	19	15	19	9	7	6	6	4	6	6	7	9	12	11	7	7	8	3	2	2	2	13	17	16	17	19	24	24
sp|Q63918|CAVN2_MOUSE	Q63918	CAVN2_MOUSE	Cavin2	418	13.2	Mus musculus OX=10090	1:Experimental evidence at protein level	Caveolae-associated protein 2	1	0.999	5	10	10	10	0	0	0	0	4	3	2	0	0	1	0	0	0	0	0	0	0	0	4	3	2	0	0	1	0	0	0	0	0	0	0	0	4	3	2
sp|Q63932|MP2K2_MOUSE	Q63932	MP2K2_MOUSE	Map2k2	401	22.2	Mus musculus OX=10090	1:Experimental evidence at protein level	Dual specificity mitogen-activated protein kinase kinase 2	1	0.999	4	8	8	12	1	0	0	1	2	2	2	0	0	0	0	0	0	0	1	0	0	1	2	2	2	0	0	0	0	0	0	0	1	0	0	3	2	2	2
sp|Q64010|CRK_MOUSE	Q64010	CRK_MOUSE	Crk	304	8.6	Mus musculus OX=10090	1:Experimental evidence at protein level	Adapter molecule crk	1	0.999	3	14	14	14	2	2	1	1	2	2	2	0	0	2	0	0	0	0	2	2	1	1	2	2	2	0	0	2	0	0	0	0	2	2	1	1	2	2	2
sp|Q64012|RALY_MOUSE	Q64012	RALY_MOUSE	Raly	312	10.6	Mus musculus OX=10090	1:Experimental evidence at protein level	RNA-binding protein Raly	1	0.999	4	7	7	7	0	0	0	0	2	3	2	0	0	0	0	0	0	0	0	0	0	0	2	3	2	0	0	0	0	0	0	0	0	0	0	0	2	3	2
sp|Q64105|SPRE_MOUSE	Q64105	SPRE_MOUSE	Spr	261	43.7	Mus musculus OX=10090	1:Experimental evidence at protein level	Sepiapterin reductase	1	0.999	9	58	58	58	3	3	4	3	8	9	9	5	6	6	0	0	0	2	3	3	4	3	8	9	9	5	6	6	0	0	0	2	3	3	4	3	8	9	9
sp|Q64133|AOFA_MOUSE	Q64133	AOFA_MOUSE	Maoa	526	11	Mus musculus OX=10090	1:Experimental evidence at protein level	Amine oxidase [flavin-containing] A	1	0.999	5	15	15	15	1	1	1	1	5	1	2	1	1	1	0	0	0	0	1	1	1	1	5	1	2	1	1	1	0	0	0	0	1	1	1	1	5	1	2
sp|Q64176|EST1E_MOUSE	Q64176	EST1E_MOUSE	Ces1e	562	29.5	Mus musculus OX=10090	1:Experimental evidence at protein level	Carboxylesterase 1E	1	0.999	11	26	26	69	2	2	1	3	4	7	6	0	1	0	0	0	0	0	2	2	1	3	4	7	6	0	1	0	0	0	0	0	5	5	5	6	8	11	11
sp|Q64213|SF01_MOUSE	Q64213	SF01_MOUSE	Sf1	653	6	Mus musculus OX=10090	1:Experimental evidence at protein level	Splicing factor 1	1	0.999	3	8	8	8	0	0	0	0	2	3	3	0	0	0	0	0	0	0	0	0	0	0	2	3	3	0	0	0	0	0	0	0	0	0	0	0	2	3	3
sp|Q64310|SURF4_MOUSE	Q64310	SURF4_MOUSE	Surf4	269	6.7	Mus musculus OX=10090	1:Experimental evidence at protein level	Surfeit locus protein 4	1	0.999	2	5	5	5	0	0	0	0	0	1	1	1	1	1	0	0	0	0	0	0	0	0	0	1	1	1	1	1	0	0	0	0	0	0	0	0	0	1	1
sp|Q64331|MYO6_MOUSE	Q64331	MYO6_MOUSE	Myo6	1265	2.4	Mus musculus OX=10090	1:Experimental evidence at protein level	Unconventional myosin-VI	1	0.999	3	6	6	6	0	0	0	0	2	3	1	0	0	0	0	0	0	0	0	0	0	0	2	3	1	0	0	0	0	0	0	0	0	0	0	0	2	3	1
sp|Q64374|RGN_MOUSE	Q64374	RGN_MOUSE	Rgn	299	46.8	Mus musculus OX=10090	1:Experimental evidence at protein level	Regucalcin	1	0.999	13	109	109	109	11	8	10	10	11	10	10	9	8	9	3	3	3	4	11	8	10	10	11	10	10	9	8	9	3	3	3	4	11	8	10	10	11	10	10
sp|Q64378|FKBP5_MOUSE	Q64378	FKBP5_MOUSE	Fkbp5	456	10.3	Mus musculus OX=10090	1:Experimental evidence at protein level	Peptidyl-prolyl cis-trans isomerase FKBP5	1	0.999	2	10	10	10	1	0	1	0	2	2	2	0	1	1	0	0	0	0	1	0	1	0	2	2	2	0	1	1	0	0	0	0	1	0	1	0	2	2	2
sp|Q64433|CH10_MOUSE	Q64433	CH10_MOUSE	Hspe1	102	60.8	Mus musculus OX=10090	1:Experimental evidence at protein level	10 kDa heat shock protein, mitochondrial	1	0.999	8	83	83	83	6	7	8	6	8	7	6	4	6	6	5	4	5	5	6	7	8	6	8	7	6	4	6	6	5	4	5	5	6	7	8	6	8	7	6
sp|Q64442|DHSO_MOUSE	Q64442	DHSO_MOUSE	Sord	357	40.9	Mus musculus OX=10090	1:Experimental evidence at protein level	Sorbitol dehydrogenase	1	0.999	15	173	173	173	11	12	11	13	19	19	17	13	13	13	9	8	7	8	11	12	11	13	19	19	17	13	13	13	9	8	7	8	11	12	11	13	19	19	17
sp|Q64464|CP3AD_MOUSE	Q64464	CP3AD_MOUSE	Cyp3a13	503	35.8	Mus musculus OX=10090	1:Experimental evidence at protein level	Cytochrome P450 3A13	1	0.999	16	93	93	93	8	5	6	8	13	10	12	6	9	11	1	0	2	2	8	5	6	8	13	10	12	6	9	11	1	0	2	2	8	5	6	8	13	10	12
sp|Q64471|GSTT1_MOUSE	Q64471	GSTT1_MOUSE	Gstt1	240	36.7	Mus musculus OX=10090	1:Experimental evidence at protein level	Glutathione S-transferase theta-1	1	0.999	12	128	128	128	11	10	11	12	13	15	13	7	7	8	5	5	7	4	11	10	11	12	13	15	13	7	7	8	5	5	7	4	11	10	11	12	13	15	13
sp|Q64514|TPP2_MOUSE	Q64514	TPP2_MOUSE	Tpp2	1262	13.5	Mus musculus OX=10090	1:Experimental evidence at protein level	Tripeptidyl-peptidase 2	1	0.999	13	38	38	38	2	3	2	1	9	8	10	0	2	1	0	0	0	0	2	3	2	1	9	8	10	0	2	1	0	0	0	0	2	3	2	1	9	8	10
sp|Q64521|GPDM_MOUSE	Q64521	GPDM_MOUSE	Gpd2	727	21	Mus musculus OX=10090	1:Experimental evidence at protein level	Glycerol-3-phosphate dehydrogenase, mitochondrial	1	0.999	14	59	59	59	3	3	1	4	11	8	13	7	4	4	1	0	0	0	3	3	1	4	11	8	13	7	4	4	1	0	0	0	3	3	1	4	11	8	13
sp|Q64726|ZA2G_MOUSE	Q64726	ZA2G_MOUSE	Azgp1	307	8.1	Mus musculus OX=10090	1:Experimental evidence at protein level	Zinc-alpha-2-glycoprotein	1	0.999	2	6	6	6	0	0	0	0	2	2	2	0	0	0	0	0	0	0	0	0	0	0	2	2	2	0	0	0	0	0	0	0	0	0	0	0	2	2	2
sp|Q64727|VINC_MOUSE	Q64727	VINC_MOUSE	Vcl	1066	34.2	Mus musculus OX=10090	1:Experimental evidence at protein level	Vinculin	1	0.999	35	182	182	182	19	14	13	16	27	24	21	12	13	18	1	0	2	2	19	14	13	16	27	24	21	12	13	18	1	0	2	2	19	14	13	16	27	24	21
sp|Q64737|PUR2_MOUSE	Q64737	PUR2_MOUSE	Gart	1010	4.5	Mus musculus OX=10090	1:Experimental evidence at protein level	Trifunctional purine biosynthetic protein adenosine-3	1	0.999	4	6	6	6	0	0	0	0	5	1	0	0	0	0	0	0	0	0	0	0	0	0	5	1	0	0	0	0	0	0	0	0	0	0	0	0	5	1	0
sp|Q64FW2|RETST_MOUSE	Q64FW2	RETST_MOUSE	Retsat	609	17.7	Mus musculus OX=10090	1:Experimental evidence at protein level	All-trans-retinol 13,14-reductase	1	0.999	10	61	61	61	4	6	6	5	7	5	6	3	9	5	1	0	2	2	4	6	6	5	7	5	6	3	9	5	1	0	2	2	4	6	6	5	7	5	6
sp|Q68FD5|CLH1_MOUSE	Q68FD5	CLH1_MOUSE	Cltc	1675	46.4	Mus musculus OX=10090	1:Experimental evidence at protein level	Clathrin heavy chain 1	1	0.999	65	526	526	526	28	31	33	39	64	69	58	40	47	46	17	13	23	18	28	31	33	39	64	69	58	40	47	46	17	13	23	18	28	31	33	39	64	69	58
sp|Q68FL6|SYMC_MOUSE	Q68FL6	SYMC_MOUSE	Mars1	902	13.9	Mus musculus OX=10090	1:Experimental evidence at protein level	Methionine--tRNA ligase, cytoplasmic	1	0.999	12	45	45	45	3	4	4	5	6	6	6	2	5	4	0	0	0	0	3	4	4	5	6	6	6	2	5	4	0	0	0	0	3	4	4	5	6	6	6
sp|Q69ZR2|HECD1_MOUSE	Q69ZR2	HECD1_MOUSE	Hectd1	2618	5.5	Mus musculus OX=10090	1:Experimental evidence at protein level	E3 ubiquitin-protein ligase HECTD1	1	0.999	5	9	9	9	0	0	0	0	4	3	2	0	0	0	0	0	0	0	0	0	0	0	4	3	2	0	0	0	0	0	0	0	0	0	0	0	4	3	2
sp|Q6A0A2|LAR4B_MOUSE	Q6A0A2	LAR4B_MOUSE	Larp4b	741	5	Mus musculus OX=10090	1:Experimental evidence at protein level	La-related protein 4B	1	0.999	4	10	10	10	0	1	0	0	1	3	3	0	1	1	0	0	0	0	0	1	0	0	1	3	3	0	1	1	0	0	0	0	0	1	0	0	1	3	3
sp|Q6A0A9|F120A_MOUSE	Q6A0A9	F120A_MOUSE	FAM120A	1112	16.5	Mus musculus OX=10090	1:Experimental evidence at protein level	Constitutive coactivator of PPAR-gamma-like protein 1	1	0.999	15	57	57	57	3	5	3	5	7	10	12	2	6	4	0	0	0	0	3	5	3	5	7	10	12	2	6	4	0	0	0	0	3	5	3	5	7	10	12
sp|Q6AW69|CGNL1_MOUSE	Q6AW69	CGNL1_MOUSE	Cgnl1	1298	6.9	Mus musculus OX=10090	1:Experimental evidence at protein level	Cingulin-like protein 1	1	0.999	3	6	6	6	0	0	0	0	2	3	1	0	0	0	0	0	0	0	0	0	0	0	2	3	1	0	0	0	0	0	0	0	0	0	0	0	2	3	1
sp|Q6DFW4|NOP58_MOUSE	Q6DFW4	NOP58_MOUSE	Nop58	536	9.1	Mus musculus OX=10090	1:Experimental evidence at protein level	Nucleolar protein 58	1	0.999	4	10	10	10	1	1	1	1	2	3	0	0	0	1	0	0	0	0	1	1	1	1	2	3	0	0	0	1	0	0	0	0	1	1	1	1	2	3	0
sp|Q6GQT9|NOMO1_MOUSE	Q6GQT9	NOMO1_MOUSE	Nomo1	1214	6	Mus musculus OX=10090	1:Experimental evidence at protein level	Nodal modulator 1	1	0.999	7	15	15	15	1	0	0	1	3	2	4	1	2	1	0	0	0	0	1	0	0	1	3	2	4	1	2	1	0	0	0	0	1	0	0	1	3	2	4
sp|Q6IRU2|TPM4_MOUSE	Q6IRU2	TPM4_MOUSE	Tpm4	248	38.7	Mus musculus OX=10090	1:Experimental evidence at protein level	Tropomyosin alpha-4 chain	1	0.999	12	33	33	59	3	2	3	1	5	4	6	2	4	3	0	0	0	0	3	2	3	1	5	4	6	2	4	3	0	0	0	0	5	4	5	3	8	7	9
sp|Q6IRU5|CLCB_MOUSE	Q6IRU5	CLCB_MOUSE	Cltb	229	15.7	Mus musculus OX=10090	1:Experimental evidence at protein level	Clathrin light chain B	1	0.999	7	33	33	33	2	3	2	4	3	2	5	3	3	3	1	0	1	1	2	3	2	4	3	2	5	3	3	3	1	0	1	1	2	3	2	4	3	2	5
sp|Q6NSR8|PEPL1_MOUSE	Q6NSR8	PEPL1_MOUSE	Npepl1	524	9.9	Mus musculus OX=10090	1:Experimental evidence at protein level	Probable aminopeptidase NPEPL1	1	0.999	4	13	13	13	1	1	1	1	1	2	2	1	1	2	0	0	0	0	1	1	1	1	1	2	2	1	1	2	0	0	0	0	1	1	1	1	1	2	2
sp|Q6NV83|SR140_MOUSE	Q6NV83	SR140_MOUSE	U2surp	1029	2.9	Mus musculus OX=10090	1:Experimental evidence at protein level	U2 snRNP-associated SURP motif-containing protein	1	0.9981	3	3	3	3	0	0	0	0	1	1	1	0	0	0	0	0	0	0	0	0	0	0	1	1	1	0	0	0	0	0	0	0	0	0	0	0	1	1	1
sp|Q6NZC7|S23IP_MOUSE	Q6NZC7	S23IP_MOUSE	Sec23ip	998	7.2	Mus musculus OX=10090	1:Experimental evidence at protein level	SEC23-interacting protein	1	0.999	4	16	16	16	1	1	1	1	3	2	3	0	1	1	0	0	1	1	1	1	1	1	3	2	3	0	1	1	0	0	1	1	1	1	1	1	3	2	3
sp|Q6NZJ6|IF4G1_MOUSE	Q6NZJ6	IF4G1_MOUSE	Eif4g1	1600	25	Mus musculus OX=10090	1:Experimental evidence at protein level	Eukaryotic translation initiation factor 4 gamma 1	1	0.999	37	148	146	148	10	10	7	10	33	20	23	11	11	13	0	0	0	0	10	10	7	10	32	20	22	11	11	13	0	0	0	0	10	10	7	10	33	20	23
sp|Q6P069|SORCN_MOUSE	Q6P069	SORCN_MOUSE	Sri	198	19.7	Mus musculus OX=10090	1:Experimental evidence at protein level	Sorcin	1	0.999	4	11	11	11	1	1	0	0	3	2	2	0	0	2	0	0	0	0	1	1	0	0	3	2	2	0	0	2	0	0	0	0	1	1	0	0	3	2	2
sp|Q6P1B1|XPP1_MOUSE	Q6P1B1	XPP1_MOUSE	Xpnpep1	623	3.5	Mus musculus OX=10090	1:Experimental evidence at protein level	Xaa-Pro aminopeptidase 1	1	0.999	2	6	6	6	0	0	0	1	1	1	2	0	1	0	0	0	0	0	0	0	0	1	1	1	2	0	1	0	0	0	0	0	0	0	0	1	1	1	2
sp|Q6P3A8|ODBB_MOUSE	Q6P3A8	ODBB_MOUSE	Bckdhb	390	21.3	Mus musculus OX=10090	1:Experimental evidence at protein level	2-oxoisovalerate dehydrogenase subunit beta, mitochondrial	1	0.999	6	36	36	36	2	2	2	3	3	6	5	4	2	3	1	1	1	1	2	2	2	3	3	6	5	4	2	3	1	1	1	1	2	2	2	3	3	6	5
sp|Q6P4T2|U520_MOUSE	Q6P4T2	U520_MOUSE	Snrnp200	2136	5.9	Mus musculus OX=10090	1:Experimental evidence at protein level	U5 small nuclear ribonucleoprotein 200 kDa helicase	1	0.999	9	20	20	20	3	2	0	2	2	6	5	0	0	0	0	0	0	0	3	2	0	2	2	6	5	0	0	0	0	0	0	0	3	2	0	2	2	6	5
sp|Q6P5E4|UGGG1_MOUSE	Q6P5E4	UGGG1_MOUSE	Uggt1	1551	14.1	Mus musculus OX=10090	1:Experimental evidence at protein level	UDP-glucose:glycoprotein glucosyltransferase 1	1	0.999	18	92	92	92	7	7	5	10	15	13	13	5	8	9	0	0	0	0	7	7	5	10	15	13	13	5	8	9	0	0	0	0	7	7	5	10	15	13	13
sp|Q6P6M7|SPCS_MOUSE	Q6P6M7	SPCS_MOUSE	Sepsecs	504	6.5	Mus musculus OX=10090	1:Experimental evidence at protein level	O-phosphoseryl-tRNA(Sec) selenium transferase	1	0.999	3	6	6	6	0	1	0	0	3	1	1	0	0	0	0	0	0	0	0	1	0	0	3	1	1	0	0	0	0	0	0	0	0	1	0	0	3	1	1
sp|Q6P8I4|PCNP_MOUSE	Q6P8I4	PCNP_MOUSE	Pcnp	178	28.7	Mus musculus OX=10090	1:Experimental evidence at protein level	PEST proteolytic signal-containing nuclear protein	1	0.999	4	6	6	6	0	0	0	0	1	3	2	0	0	0	0	0	0	0	0	0	0	0	1	3	2	0	0	0	0	0	0	0	0	0	0	0	1	3	2
sp|Q6P8X1|SNX6_MOUSE	Q6P8X1	SNX6_MOUSE	Snx6	406	13.8	Mus musculus OX=10090	1:Experimental evidence at protein level	Sorting nexin-6	1	0.999	6	13	13	20	2	2	2	1	0	0	1	2	1	2	0	0	0	0	2	2	2	1	0	0	1	2	1	2	0	0	0	0	2	2	2	2	1	2	2
sp|Q6P9Q6|FKB15_MOUSE	Q6P9Q6	FKB15_MOUSE	Fkbp15	1216	8.1	Mus musculus OX=10090	1:Experimental evidence at protein level	FK506-binding protein 15	1	0.999	6	15	15	15	0	0	0	1	3	5	6	0	0	0	0	0	0	0	0	0	0	1	3	5	6	0	0	0	0	0	0	0	0	0	0	1	3	5	6
sp|Q6PA06|ATLA2_MOUSE	Q6PA06	ATLA2_MOUSE	Atl2	583	14.2	Mus musculus OX=10090	1:Experimental evidence at protein level	Atlastin-2	1	0.999	6	22	22	22	2	1	2	4	4	4	2	2	1	0	0	0	0	0	2	1	2	4	4	4	2	2	1	0	0	0	0	0	2	1	2	4	4	4	2
sp|Q6PAM1|TXLNA_MOUSE	Q6PAM1	TXLNA_MOUSE	Txlna	554	8.1	Mus musculus OX=10090	1:Experimental evidence at protein level	Alpha-taxilin	1	0.999	3	8	8	8	0	0	0	0	4	1	3	0	0	0	0	0	0	0	0	0	0	0	4	1	3	0	0	0	0	0	0	0	0	0	0	0	4	1	3
sp|Q6PB66|LPPRC_MOUSE	Q6PB66	LPPRC_MOUSE	Lrpprc	1392	35.6	Mus musculus OX=10090	1:Experimental evidence at protein level	Leucine-rich PPR motif-containing protein, mitochondrial	1	0.999	41	153	153	153	11	9	12	9	28	14	20	14	18	18	0	0	0	0	11	9	12	9	28	14	20	14	18	18	0	0	0	0	11	9	12	9	28	14	20
sp|Q6PDI5|ECM29_MOUSE	Q6PDI5	ECM29_MOUSE	Ecpas	1840	3.2	Mus musculus OX=10090	1:Experimental evidence at protein level	Proteasome adapter and scaffold protein ECM29	1	0.9989	4	6	6	6	0	0	0	0	2	2	2	0	0	0	0	0	0	0	0	0	0	0	2	2	2	0	0	0	0	0	0	0	0	0	0	0	2	2	2
sp|Q6PDM2|SRSF1_MOUSE	Q6PDM2	SRSF1_MOUSE	Srsf1	248	28.2	Mus musculus OX=10090	1:Experimental evidence at protein level	Serine/arginine-rich splicing factor 1	1	0.999	9	46	46	46	3	3	5	5	9	7	5	2	2	2	0	1	1	1	3	3	5	5	9	7	5	2	2	2	0	1	1	1	3	3	5	5	9	7	5
sp|Q6PDN3|MYLK_MOUSE	Q6PDN3	MYLK_MOUSE	Mylk	1941	4.2	Mus musculus OX=10090	1:Experimental evidence at protein level	Myosin light chain kinase, smooth muscle	1	0.999	4	5	5	5	0	0	0	0	1	2	1	0	0	1	0	0	0	0	0	0	0	0	1	2	1	0	0	1	0	0	0	0	0	0	0	0	1	2	1
sp|Q6PGC1|DHX29_MOUSE	Q6PGC1	DHX29_MOUSE	Dhx29	1365	4	Mus musculus OX=10090	1:Experimental evidence at protein level	ATP-dependent RNA helicase DHX29	1	0.999	4	12	12	12	0	0	0	0	4	4	4	0	0	0	0	0	0	0	0	0	0	0	4	4	4	0	0	0	0	0	0	0	0	0	0	0	4	4	4
sp|Q6PGL7|WASC2_MOUSE	Q6PGL7	WASC2_MOUSE	Washc2	1334	4.6	Mus musculus OX=10090	1:Experimental evidence at protein level	WASH complex subunit 2	1	0.999	3	6	6	6	0	0	0	0	2	2	1	0	0	0	0	0	0	1	0	0	0	0	2	2	1	0	0	0	0	0	0	1	0	0	0	0	2	2	1
sp|Q6Q899|DDX58_MOUSE	Q6Q899	DDX58_MOUSE	Ddx58	926	5.7	Mus musculus OX=10090	1:Experimental evidence at protein level	Antiviral innate immune response receptor RIG-I	1	0.999	5	11	11	11	0	1	0	0	4	2	1	0	2	1	0	0	0	0	0	1	0	0	4	2	1	0	2	1	0	0	0	0	0	1	0	0	4	2	1
sp|Q6TCG2|PAQR9_MOUSE	Q6TCG2	PAQR9_MOUSE	Paqr9	375	8.5	Mus musculus OX=10090	1:Experimental evidence at protein level	Membrane progesterone receptor epsilon	1	0.999	4	26	26	26	3	3	3	3	3	3	4	1	0	2	1	0	0	0	3	3	3	3	3	3	4	1	0	2	1	0	0	0	3	3	3	3	3	3	4
sp|Q6XVG2|CP254_MOUSE	Q6XVG2	CP254_MOUSE	Cyp2c54	490	52.4	Mus musculus OX=10090	1:Experimental evidence at protein level	Cytochrome P450 2C54	1	0.999	27	82	67	215	4	9	4	13	6	10	7	6	5	7	2	4	4	1	3	7	3	11	5	9	6	5	4	6	1	3	3	1	11	16	14	26	19	29	23
sp|Q6Y7W8|GGYF2_MOUSE	Q6Y7W8	GGYF2_MOUSE	Gigyf2	1291	2.9	Mus musculus OX=10090	1:Experimental evidence at protein level	GRB10-interacting GYF protein 2	1	0.999	3	6	6	6	0	0	0	0	2	3	1	0	0	0	0	0	0	0	0	0	0	0	2	3	1	0	0	0	0	0	0	0	0	0	0	0	2	3	1
sp|Q6ZQ08|CNOT1_MOUSE	Q6ZQ08	CNOT1_MOUSE	Cnot1	2375	0.9	Mus musculus OX=10090	1:Experimental evidence at protein level	CCR4-NOT transcription complex subunit 1	1	0.999	2	5	5	5	1	1	1	0	0	2	0	0	0	0	0	0	0	0	1	1	1	0	0	2	0	0	0	0	0	0	0	0	1	1	1	0	0	2	0
sp|Q6ZQ38|CAND1_MOUSE	Q6ZQ38	CAND1_MOUSE	Cand1	1230	21.9	Mus musculus OX=10090	1:Experimental evidence at protein level	Cullin-associated NEDD8-dissociated protein 1	1	0.999	21	93	93	93	5	5	5	8	15	11	13	7	10	9	1	1	1	2	5	5	5	8	15	11	13	7	10	9	1	1	1	2	5	5	5	8	15	11	13
sp|Q6ZQ58|LARP1_MOUSE	Q6ZQ58	LARP1_MOUSE	Larp1	1072	12.4	Mus musculus OX=10090	1:Experimental evidence at protein level	La-related protein 1	1	0.999	7	19	19	19	1	0	1	1	4	4	4	0	2	2	0	0	0	0	1	0	1	1	4	4	4	0	2	2	0	0	0	0	1	0	1	1	4	4	4
sp|Q6ZQI3|MLEC_MOUSE	Q6ZQI3	MLEC_MOUSE	Mlec	291	19.9	Mus musculus OX=10090	1:Experimental evidence at protein level	Malectin	1	0.999	6	33	33	33	3	4	3	2	6	5	4	1	1	2	1	0	1	0	3	4	3	2	6	5	4	1	1	2	1	0	1	0	3	4	3	2	6	5	4
sp|Q6ZWN5|RS9_MOUSE	Q6ZWN5	RS9_MOUSE	Rps9	194	61.3	Mus musculus OX=10090	1:Experimental evidence at protein level	40S ribosomal protein S9	1	0.999	17	151	151	151	9	10	11	12	11	13	12	13	12	13	7	5	12	11	9	10	11	12	11	13	12	13	12	13	7	5	12	11	9	10	11	12	11	13	12
sp|Q6ZWV7|RL35_MOUSE	Q6ZWV7	RL35_MOUSE	Rpl35	123	18.7	Mus musculus OX=10090	1:Experimental evidence at protein level	60S ribosomal protein L35	1	0.999	3	13	13	13	2	2	2	2	0	2	0	1	1	1	0	0	0	0	2	2	2	2	0	2	0	1	1	1	0	0	0	0	2	2	2	2	0	2	0
sp|Q6ZWX6|IF2A_MOUSE	Q6ZWX6	IF2A_MOUSE	Eif2s1	315	52.1	Mus musculus OX=10090	1:Experimental evidence at protein level	Eukaryotic translation initiation factor 2 subunit 1	1	0.999	13	47	47	47	1	3	1	2	7	8	5	5	4	7	1	0	1	2	1	3	1	2	7	8	5	5	4	7	1	0	1	2	1	3	1	2	7	8	5
sp|Q71FD5|ZNRF2_MOUSE	Q71FD5	ZNRF2_MOUSE	Znrf2	238	11.3	Mus musculus OX=10090	1:Experimental evidence at protein level	E3 ubiquitin-protein ligase ZNRF2	1	0.999	2	3	3	3	0	0	0	0	2	0	1	0	0	0	0	0	0	0	0	0	0	0	2	0	1	0	0	0	0	0	0	0	0	0	0	0	2	0	1
sp|Q71KT5|ERG24_MOUSE	Q71KT5	ERG24_MOUSE	Tm7sf2	418	6.7	Mus musculus OX=10090	1:Experimental evidence at protein level	Delta(14)-sterol reductase TM7SF2	1	0.999	3	18	18	18	0	0	1	1	2	3	3	4	1	3	0	0	0	0	0	0	1	1	2	3	3	4	1	3	0	0	0	0	0	0	1	1	2	3	3
sp|Q71LX4|TLN2_MOUSE	Q71LX4	TLN2_MOUSE	Tln2	2375	7.2	Mus musculus OX=10090	1:Experimental evidence at protein level	Talin-2	1	0.999	13	10	10	39	0	0	1	1	3	5	0	0	0	0	0	0	0	0	0	0	1	1	3	5	0	0	0	0	0	0	0	0	2	2	3	4	6	8	4
sp|Q71RI9|KAT3_MOUSE	Q71RI9	KAT3_MOUSE	Kyat3	455	32.5	Mus musculus OX=10090	1:Experimental evidence at protein level	Kynurenine--oxoglutarate transaminase 3	1	0.999	13	89	89	89	9	7	7	6	12	11	9	5	6	7	2	2	3	3	9	7	7	6	12	11	9	5	6	7	2	2	3	3	9	7	7	6	12	11	9
sp|Q75N73|S39AE_MOUSE	Q75N73	S39AE_MOUSE	Slc39a14	489	4.3	Mus musculus OX=10090	1:Experimental evidence at protein level	Metal cation symporter ZIP14	1	0.999	2	7	7	7	0	1	0	1	1	2	2	0	0	0	0	0	0	0	0	1	0	1	1	2	2	0	0	0	0	0	0	0	0	1	0	1	1	2	2
sp|Q76LS9|MINY1_MOUSE	Q76LS9	MINY1_MOUSE	Mindy1	468	8.3	Mus musculus OX=10090	1:Experimental evidence at protein level	Ubiquitin carboxyl-terminal hydrolase MINDY-1	1	0.999	3	12	12	12	1	1	0	2	2	1	3	0	1	1	0	0	0	0	1	1	0	2	2	1	3	0	1	1	0	0	0	0	1	1	0	2	2	1	3
sp|Q78IK2|ATPMK_MOUSE	Q78IK2	ATPMK_MOUSE	Atp5mk	58	44.8	Mus musculus OX=10090	1:Experimental evidence at protein level	ATP synthase membrane subunit K, mitochondrial	1	0.999	3	27	27	27	2	2	2	2	3	2	4	1	1	1	2	1	2	2	2	2	2	2	3	2	4	1	1	1	2	1	2	2	2	2	2	2	3	2	4
sp|Q78IK4|MIC27_MOUSE	Q78IK4	MIC27_MOUSE	Apool	265	28.7	Mus musculus OX=10090	1:Experimental evidence at protein level	MIC	1	0.999	7	28	28	28	2	2	2	2	4	6	3	2	3	2	0	0	0	0	2	2	2	2	4	6	3	2	3	2	0	0	0	0	2	2	2	2	4	6	3
sp|Q78JT3|3HAO_MOUSE	Q78JT3	3HAO_MOUSE	Haao	286	65.4	Mus musculus OX=10090	1:Experimental evidence at protein level	3-hydroxyanthranilate 3,4-dioxygenase	1	0.999	18	173	173	173	13	14	12	12	19	19	20	11	15	16	4	5	7	6	13	14	12	12	19	19	20	11	15	16	4	5	7	6	13	14	12	12	19	19	20
sp|Q78PY7|SND1_MOUSE	Q78PY7	SND1_MOUSE	Snd1	910	58.5	Mus musculus OX=10090	1:Experimental evidence at protein level	Staphylococcal nuclease domain-containing protein 1	1	0.999	47	339	339	339	27	27	23	29	41	44	37	25	25	26	7	9	9	10	27	27	23	29	41	44	37	25	25	26	7	9	9	10	27	27	23	29	41	44	37
sp|Q78ZA7|NP1L4_MOUSE	Q78ZA7	NP1L4_MOUSE	Nap1l4	375	29.6	Mus musculus OX=10090	1:Experimental evidence at protein level	Nucleosome assembly protein 1-like 4	1	0.999	8	28	23	28	0	2	1	3	8	4	7	1	1	1	0	0	0	0	0	1	1	2	7	4	5	1	1	1	0	0	0	0	0	2	1	3	8	4	7
sp|Q791T5|MTCH1_MOUSE	Q791T5	MTCH1_MOUSE	Mtch1	389	16.2	Mus musculus OX=10090	1:Experimental evidence at protein level	Mitochondrial carrier homolog 1	1	0.999	2	7	7	7	1	0	0	1	2	2	1	0	0	0	0	0	0	0	1	0	0	1	2	2	1	0	0	0	0	0	0	0	1	0	0	1	2	2	1
sp|Q791V5|MTCH2_MOUSE	Q791V5	MTCH2_MOUSE	Mtch2	303	38.3	Mus musculus OX=10090	1:Experimental evidence at protein level	Mitochondrial carrier homolog 2	1	0.999	9	99	99	99	8	8	8	7	11	9	10	6	7	7	5	5	4	4	8	8	8	7	11	9	10	6	7	7	5	5	4	4	8	8	8	7	11	9	10
sp|Q7TMF3|NDUAC_MOUSE	Q7TMF3	NDUAC_MOUSE	Ndufa12	145	42.1	Mus musculus OX=10090	1:Experimental evidence at protein level	NADH dehydrogenase [ubiquinone] 1 alpha subcomplex subunit 12	1	0.999	5	39	39	39	4	4	4	3	4	3	3	1	3	3	2	1	2	2	4	4	4	3	4	3	3	1	3	3	2	1	2	2	4	4	4	3	4	3	3
sp|Q7TMK9|HNRPQ_MOUSE	Q7TMK9	HNRPQ_MOUSE	Syncrip	623	25.8	Mus musculus OX=10090	1:Experimental evidence at protein level	Heterogeneous nuclear ribonucleoprotein Q	1	0.999	14	47	47	47	2	2	3	3	12	9	8	3	2	3	0	0	0	0	2	2	3	3	12	9	8	3	2	3	0	0	0	0	2	2	3	3	12	9	8
sp|Q7TMY8|HUWE1_MOUSE	Q7TMY8	HUWE1_MOUSE	Huwe1	4377	2.7	Mus musculus OX=10090	1:Experimental evidence at protein level	E3 ubiquitin-protein ligase HUWE1	1	0.999	3	3	3	3	1	0	0	0	1	1	0	0	0	0	0	0	0	0	1	0	0	0	1	1	0	0	0	0	0	0	0	0	1	0	0	0	1	1	0
sp|Q7TN29|SMAP2_MOUSE	Q7TN29	SMAP2_MOUSE	Smap2	428	7.5	Mus musculus OX=10090	1:Experimental evidence at protein level	Stromal membrane-associated protein 2	1	0.999	3	6	6	6	0	0	0	0	2	0	2	0	2	0	0	0	0	0	0	0	0	0	2	0	2	0	2	0	0	0	0	0	0	0	0	0	2	0	2
sp|Q7TNC4|LC7L2_MOUSE	Q7TNC4	LC7L2_MOUSE	Luc7l2	392	19.4	Mus musculus OX=10090	1:Experimental evidence at protein level	Putative RNA-binding protein Luc7-like 2	1	0.999	8	20	10	20	0	1	0	0	5	4	7	0	1	1	1	0	0	0	0	0	0	0	3	2	3	0	1	1	0	0	0	0	0	1	0	0	5	4	7
sp|Q7TNE1|SUCHY_MOUSE	Q7TNE1	SUCHY_MOUSE	Sugct	436	5.7	Mus musculus OX=10090	1:Experimental evidence at protein level	Succinate--hydroxymethylglutarate CoA-transferase	1	0.999	3	20	20	20	1	1	3	2	2	2	3	2	2	2	0	0	0	0	1	1	3	2	2	2	3	2	2	2	0	0	0	0	1	1	3	2	2	2	3
sp|Q7TNG5|EMAL2_MOUSE	Q7TNG5	EMAL2_MOUSE	Eml2	649	6.6	Mus musculus OX=10090	1:Experimental evidence at protein level	Echinoderm microtubule-associated protein-like 2	1	0.999	2	3	3	3	0	0	0	0	2	0	1	0	0	0	0	0	0	0	0	0	0	0	2	0	1	0	0	0	0	0	0	0	0	0	0	0	2	0	1
sp|Q7TNG8|LDHD_MOUSE	Q7TNG8	LDHD_MOUSE	Ldhd	484	34.3	Mus musculus OX=10090	1:Experimental evidence at protein level	Probable D-lactate dehydrogenase, mitochondrial	1	0.999	13	51	51	51	3	3	2	2	8	8	9	5	4	4	2	0	1	0	3	3	2	2	8	8	9	5	4	4	2	0	1	0	3	3	2	2	8	8	9
sp|Q7TPV4|MBB1A_MOUSE	Q7TPV4	MBB1A_MOUSE	Mybbp1a	1344	5.1	Mus musculus OX=10090	1:Experimental evidence at protein level	Myb-binding protein 1A	1	0.999	4	11	11	11	0	0	0	0	3	4	4	0	0	0	0	0	0	0	0	0	0	0	3	4	4	0	0	0	0	0	0	0	0	0	0	0	3	4	4
sp|Q7TQI3|OTUB1_MOUSE	Q7TQI3	OTUB1_MOUSE	Otub1	271	33.2	Mus musculus OX=10090	1:Experimental evidence at protein level	Ubiquitin thioesterase OTUB1	1	0.999	8	36	36	36	2	2	2	2	6	8	7	2	3	2	0	0	0	0	2	2	2	2	6	8	7	2	3	2	0	0	0	0	2	2	2	2	6	8	7
sp|Q7TQK5|CCD93_MOUSE	Q7TQK5	CCD93_MOUSE	Ccdc93	629	5.1	Mus musculus OX=10090	1:Experimental evidence at protein level	Coiled-coil domain-containing protein 93	1	0.999	3	6	6	6	0	0	0	0	3	2	1	0	0	0	0	0	0	0	0	0	0	0	3	2	1	0	0	0	0	0	0	0	0	0	0	0	3	2	1
sp|Q7TSI3|PP6R1_MOUSE	Q7TSI3	PP6R1_MOUSE	Ppp6r1	856	5.7	Mus musculus OX=10090	1:Experimental evidence at protein level	Serine/threonine-protein phosphatase 6 regulatory subunit 1	1	0.999	4	11	11	11	0	0	0	0	4	1	6	0	0	0	0	0	0	0	0	0	0	0	4	1	6	0	0	0	0	0	0	0	0	0	0	0	4	1	6
sp|Q7TT45|RRAGD_MOUSE	Q7TT45	RRAGD_MOUSE	Rragd	449	5.3	Mus musculus OX=10090	1:Experimental evidence at protein level	Ras-related GTP-binding protein D	1	0.999	2	3	0	3	0	0	0	0	0	2	1	0	0	0	0	0	0	0	0	0	0	0	0	0	0	0	0	0	0	0	0	0	0	0	0	0	0	2	1
sp|Q80U63|MFN2_MOUSE	Q80U63	MFN2_MOUSE	Mfn2	757	13.5	Mus musculus OX=10090	1:Experimental evidence at protein level	Mitofusin-2	1	0.999	8	18	18	18	0	0	0	0	5	7	6	0	0	0	0	0	0	0	0	0	0	0	5	7	6	0	0	0	0	0	0	0	0	0	0	0	5	7	6
sp|Q80UG5|SEPT9_MOUSE	Q80UG5	SEPT9_MOUSE	Septin9	583	26.2	Mus musculus OX=10090	1:Experimental evidence at protein level	Septin-9	1	0.999	15	65	65	65	3	8	4	6	7	10	8	4	8	7	0	0	0	0	3	8	4	6	7	10	8	4	8	7	0	0	0	0	3	8	4	6	7	10	8
sp|Q80UM3|NAA15_MOUSE	Q80UM3	NAA15_MOUSE	Naa15	865	6	Mus musculus OX=10090	1:Experimental evidence at protein level	N-alpha-acetyltransferase 15, NatA auxiliary subunit	1	0.999	4	8	8	8	0	0	1	0	3	2	1	0	1	0	0	0	0	0	0	0	1	0	3	2	1	0	1	0	0	0	0	0	0	0	1	0	3	2	1
sp|Q80UM7|MOGS_MOUSE	Q80UM7	MOGS_MOUSE	Mogs	834	20.9	Mus musculus OX=10090	1:Experimental evidence at protein level	Mannosyl-oligosaccharide glucosidase	1	0.999	13	49	49	49	2	2	3	4	11	8	6	3	5	5	0	0	0	0	2	2	3	4	11	8	6	3	5	5	0	0	0	0	2	2	3	4	11	8	6
sp|Q80UP8|S20A2_MOUSE	Q80UP8	S20A2_MOUSE	Slc20a2	656	4.9	Mus musculus OX=10090	1:Experimental evidence at protein level	Sodium-dependent phosphate transporter 2	1	0.999	2	4	4	4	0	0	0	0	2	1	1	0	0	0	0	0	0	0	0	0	0	0	2	1	1	0	0	0	0	0	0	0	0	0	0	0	2	1	1
sp|Q80UU9|PGRC2_MOUSE	Q80UU9	PGRC2_MOUSE	Pgrmc2	217	26.3	Mus musculus OX=10090	1:Experimental evidence at protein level	Membrane-associated progesterone receptor component 2	1	0.999	6	14	14	18	0	0	0	1	3	4	3	0	2	1	0	0	0	0	0	0	0	1	3	4	3	0	2	1	0	0	0	0	0	0	0	2	4	5	4
sp|Q80W21|GSTM7_MOUSE	Q80W21	GSTM7_MOUSE	Gstm7	218	59.6	Mus musculus OX=10090	1:Experimental evidence at protein level	Glutathione S-transferase Mu 7	1	0.999	15	37	36	105	4	2	4	4	6	5	7	1	3	1	0	0	0	0	4	2	4	4	6	5	7	0	3	1	0	0	0	0	9	6	8	9	11	12	13
sp|Q80W54|FACE1_MOUSE	Q80W54	FACE1_MOUSE	Zmpste24	475	5.7	Mus musculus OX=10090	1:Experimental evidence at protein level	CAAX prenyl protease 1 homolog	1	0.999	3	14	14	14	2	1	1	1	2	3	2	1	0	1	0	0	0	0	2	1	1	1	2	3	2	1	0	1	0	0	0	0	2	1	1	1	2	3	2
sp|Q80WJ7|LYRIC_MOUSE	Q80WJ7	LYRIC_MOUSE	Mtdh	579	31.1	Mus musculus OX=10090	1:Experimental evidence at protein level	Protein LYRIC	1	0.999	15	73	73	73	6	6	7	6	12	11	9	5	6	5	0	0	0	0	6	6	7	6	12	11	9	5	6	5	0	0	0	0	6	6	7	6	12	11	9
sp|Q80WW9|DDRGK_MOUSE	Q80WW9	DDRGK_MOUSE	Ddrgk1	315	25.4	Mus musculus OX=10090	1:Experimental evidence at protein level	DDRGK domain-containing protein 1	1	0.999	5	22	22	22	4	2	2	2	5	1	3	1	1	1	0	0	0	0	4	2	2	2	5	1	3	1	1	1	0	0	0	0	4	2	2	2	5	1	3
sp|Q80X50|UBP2L_MOUSE	Q80X50	UBP2L_MOUSE	Ubap2l	1107	7.9	Mus musculus OX=10090	1:Experimental evidence at protein level	Ubiquitin-associated protein 2-like	1	0.999	6	18	18	18	0	2	0	2	5	5	4	0	0	0	0	0	0	0	0	2	0	2	5	5	4	0	0	0	0	0	0	0	0	2	0	2	5	5	4
sp|Q80X73|PELO_MOUSE	Q80X73	PELO_MOUSE	Pelo	385	6.5	Mus musculus OX=10090	1:Experimental evidence at protein level	Protein pelota homolog	1	0.999	2	5	5	5	0	0	0	0	2	1	2	0	0	0	0	0	0	0	0	0	0	0	2	1	2	0	0	0	0	0	0	0	0	0	0	0	2	1	2
sp|Q80X85|RT07_MOUSE	Q80X85	RT07_MOUSE	Mrps7	242	19	Mus musculus OX=10090	1:Experimental evidence at protein level	28S ribosomal protein S7, mitochondrial	1	0.999	3	6	6	6	0	0	0	0	3	1	2	0	0	0	0	0	0	0	0	0	0	0	3	1	2	0	0	0	0	0	0	0	0	0	0	0	3	1	2
sp|Q80XL6|ACD11_MOUSE	Q80XL6	ACD11_MOUSE	Acad11	779	33.9	Mus musculus OX=10090	1:Experimental evidence at protein level	Acyl-CoA dehydrogenase family member 11	1	0.999	25	212	212	212	17	16	12	18	23	20	22	17	16	18	8	7	8	10	17	16	12	18	23	20	22	17	16	18	8	7	8	10	17	16	12	18	23	20	22
sp|Q80XN0|BDH_MOUSE	Q80XN0	BDH_MOUSE	Bdh1	343	42.6	Mus musculus OX=10090	1:Experimental evidence at protein level	D-beta-hydroxybutyrate dehydrogenase, mitochondrial	1	0.999	14	108	108	108	4	5	5	10	14	14	13	9	8	9	5	4	4	4	4	5	5	10	14	14	13	9	8	9	5	4	4	4	4	5	5	10	14	14	13
sp|Q80Y14|GLRX5_MOUSE	Q80Y14	GLRX5_MOUSE	Glrx5	152	17.1	Mus musculus OX=10090	1:Experimental evidence at protein level	Glutaredoxin-related protein 5, mitochondrial	1	0.999	2	19	19	19	3	2	2	2	2	3	4	0	1	0	0	0	0	0	3	2	2	2	2	3	4	0	1	0	0	0	0	0	3	2	2	2	2	3	4
sp|Q80Y55|BSDC1_MOUSE	Q80Y55	BSDC1_MOUSE	Bsdc1	427	9.4	Mus musculus OX=10090	1:Experimental evidence at protein level	BSD domain-containing protein 1	1	0.999	2	4	4	4	0	0	0	0	1	1	2	0	0	0	0	0	0	0	0	0	0	0	1	1	2	0	0	0	0	0	0	0	0	0	0	0	1	1	2
sp|Q80YR4|ZN598_MOUSE	Q80YR4	ZN598_MOUSE	Znf598	908	4	Mus musculus OX=10090	1:Experimental evidence at protein level	E3 ubiquitin-protein ligase ZNF598	1	0.999	3	4	4	4	0	0	0	0	2	2	0	0	0	0	0	0	0	0	0	0	0	0	2	2	0	0	0	0	0	0	0	0	0	0	0	0	2	2	0
sp|Q80ZS3|RT26_MOUSE	Q80ZS3	RT26_MOUSE	Mrps26	200	15.5	Mus musculus OX=10090	1:Experimental evidence at protein level	28S ribosomal protein S26, mitochondrial	1	0.999	3	9	9	9	0	0	0	0	1	2	3	0	2	1	0	0	0	0	0	0	0	0	1	2	3	0	2	1	0	0	0	0	0	0	0	0	1	2	3
sp|Q810B6|ANFY1_MOUSE	Q810B6	ANFY1_MOUSE	Ankfy1	1169	7.1	Mus musculus OX=10090	1:Experimental evidence at protein level	Rabankyrin-5	1	0.999	5	10	10	10	0	1	0	0	4	3	2	0	0	0	0	0	0	0	0	1	0	0	4	3	2	0	0	0	0	0	0	0	0	1	0	0	4	3	2
sp|Q8BFR5|EFTU_MOUSE	Q8BFR5	EFTU_MOUSE	Tufm	452	48.5	Mus musculus OX=10090	1:Experimental evidence at protein level	Elongation factor Tu, mitochondrial	1	0.999	19	194	194	194	16	17	15	15	21	19	19	13	15	17	6	6	6	9	16	17	15	15	21	19	19	13	15	17	6	6	6	9	16	17	15	15	21	19	19
sp|Q8BFW7|LPP_MOUSE	Q8BFW7	LPP_MOUSE	Lpp	613	7.2	Mus musculus OX=10090	1:Experimental evidence at protein level	Lipoma-preferred partner homolog	1	0.999	4	6	6	6	0	0	1	0	1	1	3	0	0	0	0	0	0	0	0	0	1	0	1	1	3	0	0	0	0	0	0	0	0	0	1	0	1	1	3
sp|Q8BFY9|TNPO1_MOUSE	Q8BFY9	TNPO1_MOUSE	Tnpo1	898	7.1	Mus musculus OX=10090	1:Experimental evidence at protein level	Transportin-1	1	0.999	4	19	16	19	1	1	1	1	3	3	4	1	2	2	0	0	0	0	1	1	1	1	2	3	3	1	1	2	0	0	0	0	1	1	1	1	3	3	4
sp|Q8BG05|ROA3_MOUSE	Q8BG05	ROA3_MOUSE	Hnrnpa3	379	38.3	Mus musculus OX=10090	1:Experimental evidence at protein level	Heterogeneous nuclear ribonucleoprotein A3	1	0.999	16	112	111	112	8	8	7	8	17	14	11	7	8	9	3	4	4	4	8	8	7	8	17	13	11	7	8	9	3	4	4	4	8	8	7	8	17	14	11
sp|Q8BG32|PSD11_MOUSE	Q8BG32	PSD11_MOUSE	Psmd11	422	42.2	Mus musculus OX=10090	1:Experimental evidence at protein level	26S proteasome non-ATPase regulatory subunit 11	1	0.999	17	94	94	94	8	7	5	9	10	13	10	8	7	8	2	1	3	3	8	7	5	9	10	13	10	8	7	8	2	1	3	3	8	7	5	9	10	13	10
sp|Q8BGA8|ACSM5_MOUSE	Q8BGA8	ACSM5_MOUSE	Acsm5	578	28.2	Mus musculus OX=10090	1:Experimental evidence at protein level	Acyl-coenzyme A synthetase ACSM5, mitochondrial	1	0.999	12	80	80	80	6	6	6	8	11	7	10	6	8	7	0	1	2	2	6	6	6	8	11	7	10	6	8	7	0	1	2	2	6	6	6	8	11	7	10
sp|Q8BGC4|PTGR3_MOUSE	Q8BGC4	PTGR3_MOUSE	Zadh2	377	41.6	Mus musculus OX=10090	1:Experimental evidence at protein level	Prostaglandin reductase-3	1	0.999	12	60	60	60	4	5	6	3	8	7	9	5	6	5	1	0	0	1	4	5	6	3	8	7	9	5	6	5	1	0	0	1	4	5	6	3	8	7	9
sp|Q8BGD9|IF4B_MOUSE	Q8BGD9	IF4B_MOUSE	Eif4b	611	36.8	Mus musculus OX=10090	1:Experimental evidence at protein level	Eukaryotic translation initiation factor 4B	1	0.999	21	112	112	112	9	9	7	12	16	14	15	7	10	10	0	0	1	2	9	9	7	12	16	14	15	7	10	10	0	0	1	2	9	9	7	12	16	14	15
sp|Q8BGG9|ACNT2_MOUSE	Q8BGG9	ACNT2_MOUSE	Acnat2	420	19.5	Mus musculus OX=10090	1:Experimental evidence at protein level	Acyl-coenzyme A amino acid N-acyltransferase 2	1	0.999	7	47	11	47	5	5	4	4	6	7	8	1	3	2	1	0	0	1	1	1	1	1	2	2	2	0	1	0	0	0	0	0	5	5	4	4	6	7	8
sp|Q8BGH2|SAM50_MOUSE	Q8BGH2	SAM50_MOUSE	Samm50	469	33	Mus musculus OX=10090	1:Experimental evidence at protein level	Sorting and assembly machinery component 50 homolog	1	0.999	14	40	40	40	3	3	4	3	7	8	4	3	3	2	0	0	0	0	3	3	4	3	7	8	4	3	3	2	0	0	0	0	3	3	4	3	7	8	4
sp|Q8BGL3|ST2A8_MOUSE	Q8BGL3	ST2A8_MOUSE	Sult2a8	282	46.1	Mus musculus OX=10090	1:Experimental evidence at protein level	Sulfotransferase 2A8	1	0.999	13	71	58	71	5	4	4	7	9	11	6	12	4	6	0	1	1	1	4	3	3	6	8	10	5	11	3	5	0	0	0	0	5	4	4	7	9	11	6
sp|Q8BGQ7|SYAC_MOUSE	Q8BGQ7	SYAC_MOUSE	Aars1	968	31.7	Mus musculus OX=10090	1:Experimental evidence at protein level	Alanine--tRNA ligase, cytoplasmic	1	0.999	27	149	149	149	12	13	11	15	12	18	17	15	12	14	1	2	4	3	12	13	11	15	12	18	17	15	12	14	1	2	4	3	12	13	11	15	12	18	17
sp|Q8BGT5|ALAT2_MOUSE	Q8BGT5	ALAT2_MOUSE	Gpt2	522	20.3	Mus musculus OX=10090	1:Experimental evidence at protein level	Alanine aminotransferase 2	1	0.999	10	53	53	58	4	4	5	2	8	8	8	2	5	4	1	0	1	1	4	4	5	2	8	8	8	2	5	4	1	0	1	1	5	5	5	2	8	8	8
sp|Q8BH00|AL8A1_MOUSE	Q8BH00	AL8A1_MOUSE	Aldh8a1	487	59.1	Mus musculus OX=10090	1:Experimental evidence at protein level	2-aminomuconic semialdehyde dehydrogenase	1	0.999	25	205	205	205	16	16	17	15	23	23	25	16	15	17	4	6	7	5	16	16	17	15	23	23	25	16	15	17	4	6	7	5	16	16	17	15	23	23	25
sp|Q8BH24|TM9S4_MOUSE	Q8BH24	TM9S4_MOUSE	Tm9sf4	643	2.6	Mus musculus OX=10090	1:Experimental evidence at protein level	Transmembrane 9 superfamily member 4	1	0.999	2	13	13	13	1	0	1	0	2	2	1	2	2	2	0	0	0	0	1	0	1	0	2	2	1	2	2	2	0	0	0	0	1	0	1	0	2	2	1
sp|Q8BH58|TIPRL_MOUSE	Q8BH58	TIPRL_MOUSE	Tiprl	271	10.7	Mus musculus OX=10090	1:Experimental evidence at protein level	TIP41-like protein	1	0.999	2	6	6	6	0	1	1	0	1	1	2	0	0	0	0	0	0	0	0	1	1	0	1	1	2	0	0	0	0	0	0	0	0	1	1	0	1	1	2
sp|Q8BH59|CMC1_MOUSE	Q8BH59	CMC1_MOUSE	Slc25a12	677	18.5	Mus musculus OX=10090	1:Experimental evidence at protein level	Calcium-binding mitochondrial carrier protein Aralar1	1	0.999	10	23	23	57	2	0	1	0	6	5	3	0	3	2	0	0	1	0	2	0	1	0	6	5	3	0	3	2	0	0	1	0	4	2	2	3	9	8	5
sp|Q8BH60|GOPC_MOUSE	Q8BH60	GOPC_MOUSE	Gopc	463	14	Mus musculus OX=10090	1:Experimental evidence at protein level	Golgi-associated PDZ and coiled-coil motif-containing protein	1	0.999	4	8	8	8	0	0	0	0	2	3	2	0	1	0	0	0	0	0	0	0	0	0	2	3	2	0	1	0	0	0	0	0	0	0	0	0	2	3	2
sp|Q8BH86|GLUCM_MOUSE	Q8BH86	GLUCM_MOUSE	Dglucy	617	22	Mus musculus OX=10090	1:Experimental evidence at protein level	D-glutamate cyclase, mitochondrial	1	0.999	12	55	55	55	5	4	4	5	7	7	7	2	7	7	0	0	0	0	5	4	4	5	7	7	7	2	7	7	0	0	0	0	5	4	4	5	7	7	7
sp|Q8BH95|ECHM_MOUSE	Q8BH95	ECHM_MOUSE	Echs1	290	46.6	Mus musculus OX=10090	1:Experimental evidence at protein level	Enoyl-CoA hydratase, mitochondrial	1	0.999	17	194	194	194	17	18	15	14	22	19	20	9	13	9	11	8	9	10	17	18	15	14	22	19	20	9	13	9	11	8	9	10	17	18	15	14	22	19	20
sp|Q8BHC4|DCAKD_MOUSE	Q8BHC4	DCAKD_MOUSE	Dcakd	231	15.6	Mus musculus OX=10090	1:Experimental evidence at protein level	Dephospho-CoA kinase domain-containing protein	1	0.999	2	6	6	6	0	0	0	1	2	1	2	0	0	0	0	0	0	0	0	0	0	1	2	1	2	0	0	0	0	0	0	0	0	0	0	1	2	1	2
sp|Q8BHD7|PTBP3_MOUSE	Q8BHD7	PTBP3_MOUSE	Ptbp3	523	8.8	Mus musculus OX=10090	1:Experimental evidence at protein level	Polypyrimidine tract-binding protein 3	1	0.999	5	9	9	33	1	1	1	1	2	1	2	0	0	0	0	0	0	0	1	1	1	1	2	1	2	0	0	0	0	0	0	0	3	3	3	3	4	3	5
sp|Q8BHG1|NRDC_MOUSE	Q8BHG1	NRDC_MOUSE	Nrdc	1161	6.1	Mus musculus OX=10090	1:Experimental evidence at protein level	Nardilysin	1	0.999	5	13	13	13	0	1	0	0	4	4	3	1	0	0	0	0	0	0	0	1	0	0	4	4	3	1	0	0	0	0	0	0	0	1	0	0	4	4	3
sp|Q8BHN3|GANAB_MOUSE	Q8BHN3	GANAB_MOUSE	Ganab	944	36.9	Mus musculus OX=10090	1:Experimental evidence at protein level	Neutral alpha-glucosidase AB	1	0.999	31	265	265	265	22	20	19	22	35	35	30	16	14	19	9	6	9	9	22	20	19	22	35	35	30	16	14	19	9	6	9	9	22	20	19	22	35	35	30
sp|Q8BHS3|RBM22_MOUSE	Q8BHS3	RBM22_MOUSE	Rbm22	420	5	Mus musculus OX=10090	1:Experimental evidence at protein level	Pre-mRNA-splicing factor RBM22	1	0.9989	2	3	3	3	0	0	0	0	0	1	2	0	0	0	0	0	0	0	0	0	0	0	0	1	2	0	0	0	0	0	0	0	0	0	0	0	0	1	2
sp|Q8BI72|CARF_MOUSE	Q8BI72	CARF_MOUSE	Cdkn2aip	563	15.8	Mus musculus OX=10090	1:Experimental evidence at protein level	CDKN2A-interacting protein	1	0.999	6	13	13	13	0	0	0	0	6	4	3	0	0	0	0	0	0	0	0	0	0	0	6	4	3	0	0	0	0	0	0	0	0	0	0	0	6	4	3
sp|Q8BI84|TGO1_MOUSE	Q8BI84	TGO1_MOUSE	Mia3	1930	20.3	Mus musculus OX=10090	1:Experimental evidence at protein level	Transport and Golgi organization protein 1 homolog	1	0.999	30	108	108	108	2	2	3	6	23	29	24	6	5	8	0	0	0	0	2	2	3	6	23	29	24	6	5	8	0	0	0	0	2	2	3	6	23	29	24
sp|Q8BIJ6|SYIM_MOUSE	Q8BIJ6	SYIM_MOUSE	Iars2	1012	14.1	Mus musculus OX=10090	1:Experimental evidence at protein level	Isoleucine--tRNA ligase, mitochondrial	1	0.999	12	39	39	39	1	3	4	2	8	6	5	3	3	2	0	0	1	1	1	3	4	2	8	6	5	3	3	2	0	0	1	1	1	3	4	2	8	6	5
sp|Q8BIW1|PRUN1_MOUSE	Q8BIW1	PRUN1_MOUSE	Prune1	454	9.5	Mus musculus OX=10090	1:Experimental evidence at protein level	Exopolyphosphatase PRUNE1	1	0.999	3	3	3	3	0	0	0	0	1	2	0	0	0	0	0	0	0	0	0	0	0	0	1	2	0	0	0	0	0	0	0	0	0	0	0	0	1	2	0
sp|Q8BJ05|ZC3HE_MOUSE	Q8BJ05	ZC3HE_MOUSE	Zc3h14	735	2.9	Mus musculus OX=10090	1:Experimental evidence at protein level	Zinc finger CCCH domain-containing protein 14	1	0.999	2	3	3	3	0	0	0	0	1	1	1	0	0	0	0	0	0	0	0	0	0	0	1	1	1	0	0	0	0	0	0	0	0	0	0	0	1	1	1
sp|Q8BJ64|CHDH_MOUSE	Q8BJ64	CHDH_MOUSE	Chdh	596	45.8	Mus musculus OX=10090	1:Experimental evidence at protein level	Choline dehydrogenase, mitochondrial	1	0.999	25	190	190	190	10	12	18	17	24	21	19	15	14	16	5	3	7	9	10	12	18	17	24	21	19	15	14	16	5	3	7	9	10	12	18	17	24	21	19
sp|Q8BJ71|NUP93_MOUSE	Q8BJ71	NUP93_MOUSE	Nup93	819	5.7	Mus musculus OX=10090	1:Experimental evidence at protein level	Nuclear pore complex protein Nup93	1	0.999	2	6	6	6	0	0	0	0	1	1	3	0	0	1	0	0	0	0	0	0	0	0	1	1	3	0	0	1	0	0	0	0	0	0	0	0	1	1	3
sp|Q8BJU0|SGTA_MOUSE	Q8BJU0	SGTA_MOUSE	Sgta	315	13.7	Mus musculus OX=10090	1:Experimental evidence at protein level	Small glutamine-rich tetratricopeptide repeat-containing protein alpha	1	0.999	4	13	13	13	0	1	1	2	3	3	3	0	0	0	0	0	0	0	0	1	1	2	3	3	3	0	0	0	0	0	0	0	0	1	1	2	3	3	3
sp|Q8BJW6|EIF2A_MOUSE	Q8BJW6	EIF2A_MOUSE	Eif2a	581	12.6	Mus musculus OX=10090	1:Experimental evidence at protein level	Eukaryotic translation initiation factor 2A	1	0.999	5	22	22	22	1	3	1	0	3	4	6	1	2	1	0	0	0	0	1	3	1	0	3	4	6	1	2	1	0	0	0	0	1	3	1	0	3	4	6
sp|Q8BJY1|PSMD5_MOUSE	Q8BJY1	PSMD5_MOUSE	Psmd5	504	19.6	Mus musculus OX=10090	1:Experimental evidence at protein level	26S proteasome non-ATPase regulatory subunit 5	1	0.999	8	32	32	32	3	2	2	2	3	4	5	4	4	3	0	0	0	0	3	2	2	2	3	4	5	4	4	3	0	0	0	0	3	2	2	2	3	4	5
sp|Q8BJZ4|RT35_MOUSE	Q8BJZ4	RT35_MOUSE	Mrps35	320	20.3	Mus musculus OX=10090	1:Experimental evidence at protein level	28S ribosomal protein S35, mitochondrial	1	0.999	3	7	7	7	0	0	0	0	2	2	3	0	0	0	0	0	0	0	0	0	0	0	2	2	3	0	0	0	0	0	0	0	0	0	0	0	2	2	3
sp|Q8BK08|TMM11_MOUSE	Q8BK08	TMM11_MOUSE	Tmem11	190	15.8	Mus musculus OX=10090	1:Experimental evidence at protein level	Transmembrane protein 11, mitochondrial	1	0.9989	3	3	3	3	0	0	0	1	0	0	1	1	0	0	0	0	0	0	0	0	0	1	0	0	1	1	0	0	0	0	0	0	0	0	0	1	0	0	1
sp|Q8BK63|KC1A_MOUSE	Q8BK63	KC1A_MOUSE	Csnk1a1	337	14.2	Mus musculus OX=10090	1:Experimental evidence at protein level	Casein kinase I isoform alpha	1	0.999	2	6	6	6	0	0	0	0	2	2	2	0	0	0	0	0	0	0	0	0	0	0	2	2	2	0	0	0	0	0	0	0	0	0	0	0	2	2	2
sp|Q8BK67|RCC2_MOUSE	Q8BK67	RCC2_MOUSE	Rcc2	520	9.8	Mus musculus OX=10090	1:Experimental evidence at protein level	Protein RCC2	1	0.9989	2	2	2	2	0	0	0	0	2	0	0	0	0	0	0	0	0	0	0	0	0	0	2	0	0	0	0	0	0	0	0	0	0	0	0	0	2	0	0
sp|Q8BKX1|BAIP2_MOUSE	Q8BKX1	BAIP2_MOUSE	Baiap2	535	11.8	Mus musculus OX=10090	1:Experimental evidence at protein level	Brain-specific angiogenesis inhibitor 1-associated protein 2	1	0.999	5	7	7	7	0	0	0	0	4	2	1	0	0	0	0	0	0	0	0	0	0	0	4	2	1	0	0	0	0	0	0	0	0	0	0	0	4	2	1
sp|Q8BKZ9|ODPX_MOUSE	Q8BKZ9	ODPX_MOUSE	Pdhx	501	19.6	Mus musculus OX=10090	1:Experimental evidence at protein level	Pyruvate dehydrogenase protein X component, mitochondrial	1	0.999	9	45	45	45	2	4	1	4	7	8	6	4	3	4	1	0	0	1	2	4	1	4	7	8	6	4	3	4	1	0	0	1	2	4	1	4	7	8	6
sp|Q8BL66|EEA1_MOUSE	Q8BL66	EEA1_MOUSE	Eea1	1411	17.6	Mus musculus OX=10090	1:Experimental evidence at protein level	Early endosome antigen 1	1	0.999	17	42	42	42	1	2	1	0	10	9	10	1	6	2	0	0	0	0	1	2	1	0	10	9	10	1	6	2	0	0	0	0	1	2	1	0	10	9	10
sp|Q8BL97|SRSF7_MOUSE	Q8BL97	SRSF7_MOUSE	Srsf7	267	19.1	Mus musculus OX=10090	1:Experimental evidence at protein level	Serine/arginine-rich splicing factor 7	1	0.999	5	18	18	24	1	2	0	1	2	1	2	2	2	2	0	1	1	1	1	2	0	1	2	1	2	2	2	2	0	1	1	1	1	2	0	1	3	2	3
sp|Q8BLN5|LSS_MOUSE	Q8BLN5	LSS_MOUSE	Lss	733	11.1	Mus musculus OX=10090	1:Experimental evidence at protein level	Lanosterol synthase	1	0.999	6	14	14	14	0	1	1	0	3	4	5	0	0	0	0	0	0	0	0	1	1	0	3	4	5	0	0	0	0	0	0	0	0	1	1	0	3	4	5
sp|Q8BM55|TM214_MOUSE	Q8BM55	TM214_MOUSE	Tmem214	687	6.8	Mus musculus OX=10090	1:Experimental evidence at protein level	Transmembrane protein 214	1	0.999	4	16	16	16	0	1	0	1	3	5	3	1	1	1	0	0	0	0	0	1	0	1	3	5	3	1	1	1	0	0	0	0	0	1	0	1	3	5	3
sp|Q8BM72|HSP13_MOUSE	Q8BM72	HSP13_MOUSE	Hspa13	471	4.2	Mus musculus OX=10090	1:Experimental evidence at protein level	Heat shock 70 kDa protein 13	1	0.999	2	2	2	2	0	0	0	0	1	0	1	0	0	0	0	0	0	0	0	0	0	0	1	0	1	0	0	0	0	0	0	0	0	0	0	0	1	0	1
sp|Q8BMA6|SRP68_MOUSE	Q8BMA6	SRP68_MOUSE	Srp68	625	24.8	Mus musculus OX=10090	1:Experimental evidence at protein level	Signal recognition particle subunit SRP68	1	0.999	13	49	49	49	2	4	3	4	10	7	7	3	4	5	0	0	0	0	2	4	3	4	10	7	7	3	4	5	0	0	0	0	2	4	3	4	10	7	7
sp|Q8BMF4|ODP2_MOUSE	Q8BMF4	ODP2_MOUSE	Dlat	642	20.2	Mus musculus OX=10090	1:Experimental evidence at protein level	Dihydrolipoyllysine-residue acetyltransferase component of pyruvate dehydrogenase complex, mitochondrial	1	0.999	10	68	68	68	3	3	3	4	7	8	12	10	6	8	0	1	2	1	3	3	3	4	7	8	12	10	6	8	0	1	2	1	3	3	3	4	7	8	12
sp|Q8BMJ2|SYLC_MOUSE	Q8BMJ2	SYLC_MOUSE	Lars1	1178	10	Mus musculus OX=10090	1:Experimental evidence at protein level	Leucine--tRNA ligase, cytoplasmic	1	0.999	7	14	14	14	0	0	0	0	5	3	2	1	1	2	0	0	0	0	0	0	0	0	5	3	2	1	1	2	0	0	0	0	0	0	0	0	5	3	2
sp|Q8BMK4|CKAP4_MOUSE	Q8BMK4	CKAP4_MOUSE	Ckap4	575	5.9	Mus musculus OX=10090	1:Experimental evidence at protein level	Cytoskeleton-associated protein 4	1	0.999	3	6	6	6	0	0	0	0	3	3	0	0	0	0	0	0	0	0	0	0	0	0	3	3	0	0	0	0	0	0	0	0	0	0	0	0	3	3	0
sp|Q8BML9|SYQ_MOUSE	Q8BML9	SYQ_MOUSE	Qars1	775	18.7	Mus musculus OX=10090	1:Experimental evidence at protein level	Glutamine--tRNA ligase	1	0.999	13	63	63	63	2	7	6	6	12	9	9	5	2	5	0	0	0	0	2	7	6	6	12	9	9	5	2	5	0	0	0	0	2	7	6	6	12	9	9
sp|Q8BMS1|ECHA_MOUSE	Q8BMS1	ECHA_MOUSE	Hadha	763	53.6	Mus musculus OX=10090	1:Experimental evidence at protein level	Trifunctional enzyme subunit alpha, mitochondrial	1	0.999	33	383	383	383	29	29	28	29	38	39	36	29	27	27	18	17	17	20	29	29	28	29	38	39	36	29	27	27	18	17	17	20	29	29	28	29	38	39	36
sp|Q8BMS4|COQ3_MOUSE	Q8BMS4	COQ3_MOUSE	Coq3	370	12.4	Mus musculus OX=10090	1:Experimental evidence at protein level	Ubiquinone biosynthesis O-methyltransferase, mitochondrial	1	0.999	3	15	15	15	1	2	1	1	2	2	3	1	2	0	0	0	0	0	1	2	1	1	2	2	3	1	2	0	0	0	0	0	1	2	1	1	2	2	3
sp|Q8BP40|PPA6_MOUSE	Q8BP40	PPA6_MOUSE	Acp6	418	7.7	Mus musculus OX=10090	1:Experimental evidence at protein level	Lysophosphatidic acid phosphatase type 6	1	0.999	3	11	11	11	1	1	1	0	2	2	2	0	2	0	0	0	0	0	1	1	1	0	2	2	2	0	2	0	0	0	0	0	1	1	1	0	2	2	2
sp|Q8BP48|MAP11_MOUSE	Q8BP48	MAP11_MOUSE	Metap1	386	8	Mus musculus OX=10090	1:Experimental evidence at protein level	Methionine aminopeptidase 1	1	0.999	2	5	5	5	0	0	0	0	1	1	3	0	0	0	0	0	0	0	0	0	0	0	1	1	3	0	0	0	0	0	0	0	0	0	0	0	1	1	3
sp|Q8BP67|RL24_MOUSE	Q8BP67	RL24_MOUSE	Rpl24	157	28.7	Mus musculus OX=10090	1:Experimental evidence at protein level	60S ribosomal protein L24	1	0.999	5	48	48	48	5	5	4	4	5	6	4	4	3	4	1	1	1	1	5	5	4	4	5	6	4	4	3	4	1	1	1	1	5	5	4	4	5	6	4
sp|Q8BRF7|SCFD1_MOUSE	Q8BRF7	SCFD1_MOUSE	Scfd1	639	12.4	Mus musculus OX=10090	1:Experimental evidence at protein level	Sec1 family domain-containing protein 1	1	0.999	7	25	25	25	2	1	0	3	4	5	5	2	1	2	0	0	0	0	2	1	0	3	4	5	5	2	1	2	0	0	0	0	2	1	0	3	4	5	5
sp|Q8BSE0|RMD2_MOUSE	Q8BSE0	RMD2_MOUSE	Rmdn2	410	15.9	Mus musculus OX=10090	1:Experimental evidence at protein level	Regulator of microtubule dynamics protein 2	1	0.999	5	13	13	13	0	0	0	3	1	4	1	2	1	1	0	0	0	0	0	0	0	3	1	4	1	2	1	1	0	0	0	0	0	0	0	3	1	4	1
sp|Q8BSY0|ASPH_MOUSE	Q8BSY0	ASPH_MOUSE	Asph	741	17.1	Mus musculus OX=10090	1:Experimental evidence at protein level	Aspartyl/asparaginyl beta-hydroxylase	1	0.999	9	28	28	28	0	0	0	1	10	8	9	0	0	0	0	0	0	0	0	0	0	1	10	8	9	0	0	0	0	0	0	0	0	0	0	1	10	8	9
sp|Q8BTI8|SRRM2_MOUSE	Q8BTI8	SRRM2_MOUSE	Srrm2	2703	6.3	Mus musculus OX=10090	1:Experimental evidence at protein level	Serine/arginine repetitive matrix protein 2	1	0.999	9	20	20	20	0	1	0	1	6	7	4	0	0	1	0	0	0	0	0	1	0	1	6	7	4	0	0	1	0	0	0	0	0	1	0	1	6	7	4
sp|Q8BTY1|KAT1_MOUSE	Q8BTY1	KAT1_MOUSE	Kyat1	424	15.1	Mus musculus OX=10090	1:Experimental evidence at protein level	Kynurenine--oxoglutarate transaminase 1	1	0.999	4	6	6	6	0	0	0	0	2	2	1	0	1	0	0	0	0	0	0	0	0	0	2	2	1	0	1	0	0	0	0	0	0	0	0	0	2	2	1
sp|Q8BTY8|SCFD2_MOUSE	Q8BTY8	SCFD2_MOUSE	Scfd2	684	7.7	Mus musculus OX=10090	1:Experimental evidence at protein level	Sec1 family domain-containing protein 2	1	0.999	2	2	2	2	0	0	0	0	1	0	1	0	0	0	0	0	0	0	0	0	0	0	1	0	1	0	0	0	0	0	0	0	0	0	0	0	1	0	1
sp|Q8BU14|SEC62_MOUSE	Q8BU14	SEC62_MOUSE	Sec62	398	5.5	Mus musculus OX=10090	1:Experimental evidence at protein level	Translocation protein SEC62	1	0.999	3	5	5	5	0	1	0	1	1	0	2	0	0	0	0	0	0	0	0	1	0	1	1	0	2	0	0	0	0	0	0	0	0	1	0	1	1	0	2
sp|Q8BU30|SYIC_MOUSE	Q8BU30	SYIC_MOUSE	Iars1	1262	15.7	Mus musculus OX=10090	1:Experimental evidence at protein level	Isoleucine--tRNA ligase, cytoplasmic	1	0.999	16	50	50	50	3	1	3	5	9	7	10	3	5	4	0	0	0	0	3	1	3	5	9	7	10	3	5	4	0	0	0	0	3	1	3	5	9	7	10
sp|Q8BUK6|HOOK3_MOUSE	Q8BUK6	HOOK3_MOUSE	Hook3	718	6.8	Mus musculus OX=10090	1:Experimental evidence at protein level	Protein Hook homolog 3	1	0.999	4	6	6	6	0	0	0	0	3	2	1	0	0	0	0	0	0	0	0	0	0	0	3	2	1	0	0	0	0	0	0	0	0	0	0	0	3	2	1
sp|Q8BUV3|GEPH_MOUSE	Q8BUV3	GEPH_MOUSE	Gphn	769	18.1	Mus musculus OX=10090	1:Experimental evidence at protein level	Gephyrin	1	0.999	11	51	51	51	3	4	3	5	6	11	7	4	2	5	0	0	0	1	3	4	3	5	6	11	7	4	2	5	0	0	0	1	3	4	3	5	6	11	7
sp|Q8BUY5|TIDC1_MOUSE	Q8BUY5	TIDC1_MOUSE	Timmdc1	285	6.3	Mus musculus OX=10090	1:Experimental evidence at protein level	Complex I assembly factor TIMMDC1, mitochondrial	1	0.999	2	7	7	7	0	0	0	0	2	2	3	0	0	0	0	0	0	0	0	0	0	0	2	2	3	0	0	0	0	0	0	0	0	0	0	0	2	2	3
sp|Q8BVE3|VATH_MOUSE	Q8BVE3	VATH_MOUSE	Atp6v1h	483	15.7	Mus musculus OX=10090	1:Experimental evidence at protein level	V-type proton ATPase subunit H	1	0.999	5	10	10	10	0	0	0	0	2	3	3	1	0	1	0	0	0	0	0	0	0	0	2	3	3	1	0	1	0	0	0	0	0	0	0	0	2	3	3
sp|Q8BVI4|DHPR_MOUSE	Q8BVI4	DHPR_MOUSE	Qdpr	241	31.5	Mus musculus OX=10090	1:Experimental evidence at protein level	Dihydropteridine reductase	1	0.999	5	33	33	33	3	2	2	2	4	5	4	3	3	4	0	0	0	1	3	2	2	2	4	5	4	3	3	4	0	0	0	1	3	2	2	2	4	5	4
sp|Q8BW75|AOFB_MOUSE	Q8BW75	AOFB_MOUSE	Maob	520	58.5	Mus musculus OX=10090	1:Experimental evidence at protein level	Amine oxidase [flavin-containing] B	1	0.999	26	224	224	224	17	16	18	18	26	28	22	14	16	18	7	6	8	10	17	16	18	18	26	28	22	14	16	18	7	6	8	10	17	16	18	18	26	28	22
sp|Q8BWF0|SSDH_MOUSE	Q8BWF0	SSDH_MOUSE	Aldh5a1	523	24.7	Mus musculus OX=10090	1:Experimental evidence at protein level	Succinate-semialdehyde dehydrogenase, mitochondrial	1	0.999	11	74	74	74	8	7	6	6	10	10	9	4	4	4	1	0	2	3	8	7	6	6	10	10	9	4	4	4	1	0	2	3	8	7	6	6	10	10	9
sp|Q8BWM0|PGES2_MOUSE	Q8BWM0	PGES2_MOUSE	Ptges2	384	4.7	Mus musculus OX=10090	1:Experimental evidence at protein level	Prostaglandin E synthase 2	1	0.9988	2	2	2	2	0	1	0	0	0	1	0	0	0	0	0	0	0	0	0	1	0	0	0	1	0	0	0	0	0	0	0	0	0	1	0	0	0	1	0
sp|Q8BWP5|TTPA_MOUSE	Q8BWP5	TTPA_MOUSE	Ttpa	278	75.5	Mus musculus OX=10090	1:Experimental evidence at protein level	Alpha-tocopherol transfer protein	1	0.999	15	70	70	70	4	4	3	9	8	13	11	8	4	3	1	1	1	0	4	4	3	9	8	13	11	8	4	3	1	1	1	0	4	4	3	9	8	13	11
sp|Q8BWT1|THIM_MOUSE	Q8BWT1	THIM_MOUSE	Acaa2	397	71.5	Mus musculus OX=10090	1:Experimental evidence at protein level	3-ketoacyl-CoA thiolase, mitochondrial	1	0.999	29	450	450	450	29	29	29	29	47	43	44	29	39	32	25	24	24	27	29	29	29	29	47	43	44	29	39	32	25	24	24	27	29	29	29	29	47	43	44
sp|Q8BWU8|AT2L1_MOUSE	Q8BWU8	AT2L1_MOUSE	Etnppl	499	17	Mus musculus OX=10090	2:Experimental evidence at transcript level	Ethanolamine-phosphate phospho-lyase	1	0.999	8	16	16	16	1	1	1	0	6	2	3	0	1	1	0	0	0	0	1	1	1	0	6	2	3	0	1	1	0	0	0	0	1	1	1	0	6	2	3
sp|Q8BWY3|ERF1_MOUSE	Q8BWY3	ERF1_MOUSE	Etf1	437	17.8	Mus musculus OX=10090	1:Experimental evidence at protein level	Eukaryotic peptide chain release factor subunit 1	1	0.999	7	33	33	33	3	3	2	2	7	6	6	1	2	1	0	0	0	0	3	3	2	2	7	6	6	1	2	1	0	0	0	0	3	3	2	2	7	6	6
sp|Q8BX10|PGAM5_MOUSE	Q8BX10	PGAM5_MOUSE	Pgam5	288	10.8	Mus musculus OX=10090	1:Experimental evidence at protein level	Serine/threonine-protein phosphatase PGAM5, mitochondrial	1	0.999	3	5	5	5	0	0	0	0	3	1	1	0	0	0	0	0	0	0	0	0	0	0	3	1	1	0	0	0	0	0	0	0	0	0	0	0	3	1	1
sp|Q8BX70|VP13C_MOUSE	Q8BX70	VP13C_MOUSE	Vps13c	3748	3.2	Mus musculus OX=10090	1:Experimental evidence at protein level	Vacuolar protein sorting-associated protein 13C	1	0.999	6	13	13	13	0	0	0	0	3	6	4	0	0	0	0	0	0	0	0	0	0	0	3	6	4	0	0	0	0	0	0	0	0	0	0	0	3	6	4
sp|Q8BX90|FND3A_MOUSE	Q8BX90	FND3A_MOUSE	Fndc3a	1198	6.1	Mus musculus OX=10090	1:Experimental evidence at protein level	Fibronectin type-III domain-containing protein 3A	1	0.999	4	7	7	7	0	0	0	0	1	3	2	0	0	1	0	0	0	0	0	0	0	0	1	3	2	0	0	1	0	0	0	0	0	0	0	0	1	3	2
sp|Q8BXA1|GOLI4_MOUSE	Q8BXA1	GOLI4_MOUSE	Golim4	655	7.9	Mus musculus OX=10090	1:Experimental evidence at protein level	Golgi integral membrane protein 4	1	0.999	4	11	11	11	1	0	1	0	1	4	4	0	0	0	0	0	0	0	1	0	1	0	1	4	4	0	0	0	0	0	0	0	1	0	1	0	1	4	4
sp|Q8BXB6|SO2B1_MOUSE	Q8BXB6	SO2B1_MOUSE	Slco2b1	683	10.4	Mus musculus OX=10090	1:Experimental evidence at protein level	Solute carrier organic anion transporter family member 2B1	1	0.999	5	22	22	22	1	2	2	1	5	4	3	1	1	2	0	0	0	0	1	2	2	1	5	4	3	1	1	2	0	0	0	0	1	2	2	1	5	4	3
sp|Q8BY87|UBP47_MOUSE	Q8BY87	UBP47_MOUSE	Usp47	1376	3.5	Mus musculus OX=10090	1:Experimental evidence at protein level	Ubiquitin carboxyl-terminal hydrolase 47	1	0.999	4	6	6	6	0	0	0	0	3	1	2	0	0	0	0	0	0	0	0	0	0	0	3	1	2	0	0	0	0	0	0	0	0	0	0	0	3	1	2
sp|Q8BYA0|TBCD_MOUSE	Q8BYA0	TBCD_MOUSE	Tbcd	1196	3.3	Mus musculus OX=10090	1:Experimental evidence at protein level	Tubulin-specific chaperone D	1	0.999	3	6	6	6	0	0	0	0	2	3	1	0	0	0	0	0	0	0	0	0	0	0	2	3	1	0	0	0	0	0	0	0	0	0	0	0	2	3	1
sp|Q8BYU6|TOIP2_MOUSE	Q8BYU6	TOIP2_MOUSE	Tor1aip2	502	18.9	Mus musculus OX=10090	1:Experimental evidence at protein level	Torsin-1A-interacting protein 2	1	0.999	6	24	24	24	2	3	1	1	4	6	5	1	0	1	0	0	0	0	2	3	1	1	4	6	5	1	0	1	0	0	0	0	2	3	1	1	4	6	5
sp|Q8BZ09|ODC_MOUSE	Q8BZ09	ODC_MOUSE	Slc25a21	298	11.4	Mus musculus OX=10090	1:Experimental evidence at protein level	Mitochondrial 2-oxodicarboxylate carrier	1	0.999	3	7	7	7	1	0	0	1	2	2	1	0	0	0	0	0	0	0	1	0	0	1	2	2	1	0	0	0	0	0	0	0	1	0	0	1	2	2	1
sp|Q8C0C7|SYFA_MOUSE	Q8C0C7	SYFA_MOUSE	Farsa	508	23.2	Mus musculus OX=10090	1:Experimental evidence at protein level	Phenylalanine--tRNA ligase alpha subunit	1	0.999	10	56	56	56	5	5	5	5	5	6	5	5	6	5	1	1	1	1	5	5	5	5	5	6	5	5	6	5	1	1	1	1	5	5	5	5	5	6	5
sp|Q8C0E2|VP26B_MOUSE	Q8C0E2	VP26B_MOUSE	Vps26b	336	16.7	Mus musculus OX=10090	1:Experimental evidence at protein level	Vacuolar protein sorting-associated protein 26B	1	0.999	5	14	14	14	0	1	0	0	3	4	3	1	1	1	0	0	0	0	0	1	0	0	3	4	3	1	1	1	0	0	0	0	0	1	0	0	3	4	3
sp|Q8C0J2|A16L1_MOUSE	Q8C0J2	A16L1_MOUSE	Atg16l1	607	7.9	Mus musculus OX=10090	1:Experimental evidence at protein level	Autophagy-related protein 16-1	1	0.999	2	4	4	4	0	0	0	0	2	1	1	0	0	0	0	0	0	0	0	0	0	0	2	1	1	0	0	0	0	0	0	0	0	0	0	0	2	1	1
sp|Q8C0Z1|F234A_MOUSE	Q8C0Z1	F234A_MOUSE	Fam234a	555	10.6	Mus musculus OX=10090	1:Experimental evidence at protein level	Protein FAM234A	1	0.999	5	15	15	15	1	0	0	1	4	3	2	1	1	2	0	0	0	0	1	0	0	1	4	3	2	1	1	2	0	0	0	0	1	0	0	1	4	3	2
sp|Q8C165|P20D1_MOUSE	Q8C165	P20D1_MOUSE	Pm20d1	503	33.2	Mus musculus OX=10090	1:Experimental evidence at protein level	N-fatty-acyl-amino acid synthase/hydrolase PM20D1	1	0.999	12	57	57	57	3	3	4	5	8	12	8	4	4	5	0	0	1	0	3	3	4	5	8	12	8	4	4	5	0	0	1	0	3	3	4	5	8	12	8
sp|Q8C166|CPNE1_MOUSE	Q8C166	CPNE1_MOUSE	Cpne1	536	3.7	Mus musculus OX=10090	1:Experimental evidence at protein level	Copine-1	1	0.999	2	11	11	11	1	1	1	1	1	2	2	1	0	1	0	0	0	0	1	1	1	1	1	2	2	1	0	1	0	0	0	0	1	1	1	1	1	2	2
sp|Q8C196|CPSM_MOUSE	Q8C196	CPSM_MOUSE	Cps1	1500	73.4	Mus musculus OX=10090	1:Experimental evidence at protein level	Carbamoyl-phosphate synthase [ammonia], mitochondrial	1	0.999	136	2841	2749	2841	235	228	209	183	347	292	330	105	220	190	133	109	127	133	228	220	202	176	341	285	323	99	214	183	127	103	121	127	235	228	209	183	347	292	330
sp|Q8C2Q3|RBM14_MOUSE	Q8C2Q3	RBM14_MOUSE	Rbm14	669	14.6	Mus musculus OX=10090	1:Experimental evidence at protein level	RNA-binding protein 14	1	0.999	8	18	18	18	0	1	0	2	3	2	3	1	2	4	0	0	0	0	0	1	0	2	3	2	3	1	2	4	0	0	0	0	0	1	0	2	3	2	3
sp|Q8C3X8|LMF2_MOUSE	Q8C3X8	LMF2_MOUSE	Lmf2	702	6	Mus musculus OX=10090	1:Experimental evidence at protein level	Lipase maturation factor 2	1	0.999	3	9	9	9	1	2	1	1	1	2	1	0	0	0	0	0	0	0	1	2	1	1	1	2	1	0	0	0	0	0	0	0	1	2	1	1	1	2	1
sp|Q8C5H8|NAKD2_MOUSE	Q8C5H8	NAKD2_MOUSE	Nadk2	452	47.6	Mus musculus OX=10090	1:Experimental evidence at protein level	NAD kinase 2, mitochondrial	1	0.999	14	74	74	74	6	6	5	4	11	11	8	4	6	10	1	0	1	1	6	6	5	4	11	11	8	4	6	10	1	0	1	1	6	6	5	4	11	11	8
sp|Q8C5W0|CLMN_MOUSE	Q8C5W0	CLMN_MOUSE	Clmn	1052	9	Mus musculus OX=10090	1:Experimental evidence at protein level	Calmin	1	0.999	8	20	20	20	0	1	0	2	5	4	6	0	1	1	0	0	0	0	0	1	0	2	5	4	6	0	1	1	0	0	0	0	0	1	0	2	5	4	6
sp|Q8C5W3|TBCEL_MOUSE	Q8C5W3	TBCEL_MOUSE	Tbcel	424	10.4	Mus musculus OX=10090	1:Experimental evidence at protein level	Tubulin-specific chaperone cofactor E-like protein	1	0.999	3	6	6	6	0	0	0	0	2	2	1	1	0	0	0	0	0	0	0	0	0	0	2	2	1	1	0	0	0	0	0	0	0	0	0	0	2	2	1
sp|Q8C7E7|STBD1_MOUSE	Q8C7E7	STBD1_MOUSE	Stbd1	338	44.1	Mus musculus OX=10090	1:Experimental evidence at protein level	Starch-binding domain-containing protein 1	1	0.999	12	39	39	39	3	1	2	7	3	6	6	6	2	3	0	0	0	0	3	1	2	7	3	6	6	6	2	3	0	0	0	0	3	1	2	7	3	6	6
sp|Q8C7H1|MMAA_MOUSE	Q8C7H1	MMAA_MOUSE	Mmaa	415	10.4	Mus musculus OX=10090	1:Experimental evidence at protein level	Methylmalonic aciduria type A homolog, mitochondrial	1	0.999	3	5	5	5	0	0	0	0	3	1	1	0	0	0	0	0	0	0	0	0	0	0	3	1	1	0	0	0	0	0	0	0	0	0	0	0	3	1	1
sp|Q8C7X2|EMC1_MOUSE	Q8C7X2	EMC1_MOUSE	Emc1	997	9.7	Mus musculus OX=10090	1:Experimental evidence at protein level	ER membrane protein complex subunit 1	1	0.999	8	22	22	22	1	3	2	1	4	4	5	0	0	2	0	0	0	0	1	3	2	1	4	4	5	0	0	2	0	0	0	0	1	3	2	1	4	4	5
sp|Q8C854|MYEF2_MOUSE	Q8C854	MYEF2_MOUSE	Myef2	591	12	Mus musculus OX=10090	1:Experimental evidence at protein level	Myelin expression factor 2	1	0.999	2	4	4	4	0	0	0	0	2	1	1	0	0	0	0	0	0	0	0	0	0	0	2	1	1	0	0	0	0	0	0	0	0	0	0	0	2	1	1
sp|Q8CAQ8|MIC60_MOUSE	Q8CAQ8	MIC60_MOUSE	Immt	757	48.7	Mus musculus OX=10090	1:Experimental evidence at protein level	MIC	1	0.999	42	272	272	272	19	19	23	20	33	35	34	19	18	21	5	3	10	13	19	19	23	20	33	35	34	19	18	21	5	3	10	13	19	19	23	20	33	35	34
sp|Q8CAS9|PARP9_MOUSE	Q8CAS9	PARP9_MOUSE	Parp9	866	6	Mus musculus OX=10090	1:Experimental evidence at protein level	Protein mono-ADP-ribosyltransferase PARP9	1	0.999	3	5	5	5	0	0	0	1	1	2	1	0	0	0	0	0	0	0	0	0	0	1	1	2	1	0	0	0	0	0	0	0	0	0	0	1	1	2	1
sp|Q8CAY6|THIC_MOUSE	Q8CAY6	THIC_MOUSE	Acat2	397	31.2	Mus musculus OX=10090	1:Experimental evidence at protein level	Acetyl-CoA acetyltransferase, cytosolic	1	0.999	12	119	119	119	11	11	10	11	12	12	11	5	9	7	5	4	5	6	11	11	10	11	12	12	11	5	9	7	5	4	5	6	11	11	10	11	12	12	11
sp|Q8CC86|PNCB_MOUSE	Q8CC86	PNCB_MOUSE	Naprt	538	31.6	Mus musculus OX=10090	1:Experimental evidence at protein level	Nicotinate phosphoribosyltransferase	1	0.999	15	60	60	60	2	3	4	5	7	9	8	5	6	5	1	1	2	2	2	3	4	5	7	9	8	5	6	5	1	1	2	2	2	3	4	5	7	9	8
sp|Q8CC88|VWA8_MOUSE	Q8CC88	VWA8_MOUSE	Vwa8	1905	33	Mus musculus OX=10090	1:Experimental evidence at protein level	von Willebrand factor A domain-containing protein 8	1	0.999	55	197	197	197	13	8	11	15	34	30	33	19	17	13	1	0	2	1	13	8	11	15	34	30	33	19	17	13	1	0	2	1	13	8	11	15	34	30	33
sp|Q8CCJ3|UFL1_MOUSE	Q8CCJ3	UFL1_MOUSE	Ufl1	793	16	Mus musculus OX=10090	1:Experimental evidence at protein level	E3 UFM1-protein ligase 1	1	0.999	7	12	12	12	2	0	0	0	3	5	2	0	0	0	0	0	0	0	2	0	0	0	3	5	2	0	0	0	0	0	0	0	2	0	0	0	3	5	2
sp|Q8CCS6|PABP2_MOUSE	Q8CCS6	PABP2_MOUSE	Pabpn1	302	11.6	Mus musculus OX=10090	1:Experimental evidence at protein level	Polyadenylate-binding protein 2	1	0.999	3	17	17	17	1	1	1	1	2	3	3	1	2	2	0	0	0	0	1	1	1	1	2	3	3	1	2	2	0	0	0	0	1	1	1	1	2	3	3
sp|Q8CDN6|TXNL1_MOUSE	Q8CDN6	TXNL1_MOUSE	Txnl1	289	32.5	Mus musculus OX=10090	1:Experimental evidence at protein level	Thioredoxin-like protein 1	1	0.999	6	22	22	22	1	1	1	1	5	8	2	1	0	1	1	0	0	0	1	1	1	1	5	8	2	1	0	1	1	0	0	0	1	1	1	1	5	8	2
sp|Q8CFA2|GCST_MOUSE	Q8CFA2	GCST_MOUSE	Amt	403	15.1	Mus musculus OX=10090	1:Experimental evidence at protein level	Aminomethyltransferase, mitochondrial	1	0.999	6	29	29	29	3	2	2	3	6	7	5	0	1	0	0	0	0	0	3	2	2	3	6	7	5	0	1	0	0	0	0	0	3	2	2	3	6	7	5
sp|Q8CFJ7|S2545_MOUSE	Q8CFJ7	S2545_MOUSE	Slc25a45	288	20.8	Mus musculus OX=10090	1:Experimental evidence at protein level	Solute carrier family 25 member 45	1	0.999	3	14	14	14	1	1	1	1	1	3	3	1	1	1	0	0	0	0	1	1	1	1	1	3	3	1	1	1	0	0	0	0	1	1	1	1	1	3	3
sp|Q8CFX1|G6PE_MOUSE	Q8CFX1	G6PE_MOUSE	H6pd	789	29.9	Mus musculus OX=10090	1:Experimental evidence at protein level	GDH/6PGL endoplasmic bifunctional protein	1	0.999	21	115	115	115	8	9	10	11	17	18	13	8	9	7	0	0	1	4	8	9	10	11	17	18	13	8	9	7	0	0	1	4	8	9	10	11	17	18	13
sp|Q8CG76|ARK72_MOUSE	Q8CG76	ARK72_MOUSE	Akr7a2	367	37.1	Mus musculus OX=10090	1:Experimental evidence at protein level	Aflatoxin B1 aldehyde reductase member 2	1	0.999	11	73	73	73	5	5	7	4	12	11	9	7	5	7	1	0	0	0	5	5	7	4	12	11	9	7	5	7	1	0	0	0	5	5	7	4	12	11	9
sp|Q8CGC7|SYEP_MOUSE	Q8CGC7	SYEP_MOUSE	Eprs1	1512	29.1	Mus musculus OX=10090	1:Experimental evidence at protein level	Bifunctional glutamate/proline--tRNA ligase	1	0.999	32	158	158	158	13	12	10	10	25	23	27	10	12	13	0	0	1	2	13	12	10	10	25	23	27	10	12	13	0	0	1	2	13	12	10	10	25	23	27
sp|Q8CGK3|LONM_MOUSE	Q8CGK3	LONM_MOUSE	Lonp1	949	39.4	Mus musculus OX=10090	1:Experimental evidence at protein level	Lon protease homolog, mitochondrial	1	0.999	33	158	158	158	10	8	10	11	22	17	23	11	17	19	4	1	3	2	10	8	10	11	22	17	23	11	17	19	4	1	3	2	10	8	10	11	22	17	23
sp|Q8CH18|CCAR1_MOUSE	Q8CH18	CCAR1_MOUSE	Ccar1	1146	4.9	Mus musculus OX=10090	1:Experimental evidence at protein level	Cell division cycle and apoptosis regulator protein 1	1	0.999	3	6	6	6	0	0	0	0	2	2	2	0	0	0	0	0	0	0	0	0	0	0	2	2	2	0	0	0	0	0	0	0	0	0	0	0	2	2	2
sp|Q8CH25|SLTM_MOUSE	Q8CH25	SLTM_MOUSE	Sltm	1031	4.4	Mus musculus OX=10090	1:Experimental evidence at protein level	SAFB-like transcription modulator	1	0.999	2	2	2	2	0	0	0	0	0	1	1	0	0	0	0	0	0	0	0	0	0	0	0	1	1	0	0	0	0	0	0	0	0	0	0	0	0	1	1
sp|Q8CHG3|GCC2_MOUSE	Q8CHG3	GCC2_MOUSE	Gcc2	1679	3.3	Mus musculus OX=10090	1:Experimental evidence at protein level	GRIP and coiled-coil domain-containing protein 2	1	0.999	4	4	4	4	0	0	0	0	1	2	1	0	0	0	0	0	0	0	0	0	0	0	1	2	1	0	0	0	0	0	0	0	0	0	0	0	1	2	1
sp|Q8CHR6|DPYD_MOUSE	Q8CHR6	DPYD_MOUSE	Dpyd	1025	28.2	Mus musculus OX=10090	1:Experimental evidence at protein level	Dihydropyrimidine dehydrogenase [NADP(+)]	1	0.999	21	87	87	87	5	6	5	4	18	16	13	3	9	7	0	0	0	1	5	6	5	4	18	16	13	3	9	7	0	0	0	1	5	6	5	4	18	16	13
sp|Q8CHT0|AL4A1_MOUSE	Q8CHT0	AL4A1_MOUSE	Aldh4a1	562	51.4	Mus musculus OX=10090	1:Experimental evidence at protein level	Delta-1-pyrroline-5-carboxylate dehydrogenase, mitochondrial	1	0.999	25	278	278	278	20	18	20	22	26	33	31	21	19	17	10	14	15	12	20	18	20	22	26	33	31	21	19	17	10	14	15	12	20	18	20	22	26	33	31
sp|Q8CHW4|EI2BE_MOUSE	Q8CHW4	EI2BE_MOUSE	Eif2b5	717	4.9	Mus musculus OX=10090	1:Experimental evidence at protein level	Translation initiation factor eIF-2B subunit epsilon	1	0.999	3	11	11	11	0	0	1	1	3	2	2	0	1	1	0	0	0	0	0	0	1	1	3	2	2	0	1	1	0	0	0	0	0	0	1	1	3	2	2
sp|Q8CI51|PDLI5_MOUSE	Q8CI51	PDLI5_MOUSE	Pdlim5	591	22.5	Mus musculus OX=10090	1:Experimental evidence at protein level	PDZ and LIM domain protein 5	1	0.999	11	48	48	48	3	3	2	3	10	8	9	3	4	3	0	0	0	0	3	3	2	3	10	8	9	3	4	3	0	0	0	0	3	3	2	3	10	8	9
sp|Q8CIB5|FERM2_MOUSE	Q8CIB5	FERM2_MOUSE	Fermt2	680	17.2	Mus musculus OX=10090	1:Experimental evidence at protein level	Fermitin family homolog 2	1	0.999	10	29	29	29	1	2	0	2	7	7	7	1	0	2	0	0	0	0	1	2	0	2	7	7	7	1	0	2	0	0	0	0	1	2	0	2	7	7	7
sp|Q8CIE6|COPA_MOUSE	Q8CIE6	COPA_MOUSE	Copa	1224	26.6	Mus musculus OX=10090	1:Experimental evidence at protein level	Coatomer subunit alpha	1	0.999	30	167	167	167	16	11	12	16	20	18	22	16	16	16	1	0	1	2	16	11	12	16	20	18	22	16	16	16	1	0	1	2	16	11	12	16	20	18	22
sp|Q8CIM7|CP2DQ_MOUSE	Q8CIM7	CP2DQ_MOUSE	Cyp2d26	500	59.4	Mus musculus OX=10090	1:Experimental evidence at protein level	Cytochrome P450 2D26	1	0.999	28	322	227	322	23	25	27	25	32	34	30	20	23	19	16	16	14	18	17	17	19	17	21	23	20	15	17	14	11	12	10	14	23	25	27	25	32	34	30
sp|Q8CJ61|CKLF4_MOUSE	Q8CJ61	CKLF4_MOUSE	Cmtm4	208	9.1	Mus musculus OX=10090	1:Experimental evidence at protein level	CKLF-like MARVEL transmembrane domain-containing protein 4	1	0.999	2	8	8	8	1	0	1	0	2	2	1	0	0	1	0	0	0	0	1	0	1	0	2	2	1	0	0	1	0	0	0	0	1	0	1	0	2	2	1
sp|Q8JZK9|HMCS1_MOUSE	Q8JZK9	HMCS1_MOUSE	Hmgcs1	520	19.2	Mus musculus OX=10090	1:Experimental evidence at protein level	Hydroxymethylglutaryl-CoA synthase, cytoplasmic	1	0.999	9	23	23	42	1	0	1	1	4	6	4	0	2	4	0	0	0	0	1	0	1	1	4	6	4	0	2	4	0	0	0	0	2	1	3	2	5	8	5
sp|Q8JZN5|ACAD9_MOUSE	Q8JZN5	ACAD9_MOUSE	Acad9	625	39.4	Mus musculus OX=10090	1:Experimental evidence at protein level	Complex I assembly factor ACAD9, mitochondrial	1	0.999	22	92	92	92	6	6	5	6	21	13	13	6	9	6	0	0	0	1	6	6	5	6	21	13	13	6	9	6	0	0	0	1	6	6	5	6	21	13	13
sp|Q8JZN7|MIRO2_MOUSE	Q8JZN7	MIRO2_MOUSE	Rhot2	620	6.3	Mus musculus OX=10090	1:Experimental evidence at protein level	Mitochondrial Rho GTPase 2	1	0.999	3	4	4	4	0	0	0	0	1	1	2	0	0	0	0	0	0	0	0	0	0	0	1	1	2	0	0	0	0	0	0	0	0	0	0	0	1	1	2
sp|Q8JZQ2|AFG32_MOUSE	Q8JZQ2	AFG32_MOUSE	Afg3l2	802	17.8	Mus musculus OX=10090	1:Experimental evidence at protein level	AFG3-like protein 2	1	0.999	13	42	31	42	2	4	3	4	7	8	7	2	3	0	1	0	1	0	1	2	1	3	6	7	6	1	2	0	1	0	1	0	2	4	3	4	7	8	7
sp|Q8JZQ9|EIF3B_MOUSE	Q8JZQ9	EIF3B_MOUSE	Eif3b	803	17.8	Mus musculus OX=10090	1:Experimental evidence at protein level	Eukaryotic translation initiation factor 3 subunit B	1	0.999	9	53	53	53	5	3	3	4	10	9	9	3	4	2	1	0	0	0	5	3	3	4	10	9	9	3	4	2	1	0	0	0	5	3	3	4	10	9	9
sp|Q8JZR0|ACSL5_MOUSE	Q8JZR0	ACSL5_MOUSE	Acsl5	683	43.8	Mus musculus OX=10090	1:Experimental evidence at protein level	Long-chain-fatty-acid--CoA ligase 5	1	0.999	25	144	144	180	9	11	11	11	18	14	16	11	8	13	6	5	6	5	9	11	11	11	18	14	16	11	8	13	6	5	6	5	12	14	13	14	21	17	19
sp|Q8JZU2|TXTP_MOUSE	Q8JZU2	TXTP_MOUSE	Slc25a1	311	31.2	Mus musculus OX=10090	1:Experimental evidence at protein level	Tricarboxylate transport protein, mitochondrial	1	0.999	9	68	68	68	5	6	6	5	7	7	5	6	6	5	3	3	3	1	5	6	6	5	7	7	5	6	6	5	3	3	3	1	5	6	6	5	7	7	5
sp|Q8JZV9|BDH2_MOUSE	Q8JZV9	BDH2_MOUSE	Bdh2	245	9	Mus musculus OX=10090	1:Experimental evidence at protein level	3-hydroxybutyrate dehydrogenase type 2	1	0.999	2	4	4	4	0	0	0	0	1	1	1	0	1	0	0	0	0	0	0	0	0	0	1	1	1	0	1	0	0	0	0	0	0	0	0	0	1	1	1
sp|Q8JZZ0|UD3A2_MOUSE	Q8JZZ0	UD3A2_MOUSE	Ugt3a2	523	19.7	Mus musculus OX=10090	1:Experimental evidence at protein level	UDP-glucuronosyltransferase 3A2	1	0.999	10	68	52	68	5	5	7	7	9	8	6	4	5	2	3	2	2	3	4	4	5	5	8	7	5	3	3	2	1	1	2	2	5	5	7	7	9	8	6
sp|Q8K010|OPLA_MOUSE	Q8K010	OPLA_MOUSE	Oplah	1288	27.6	Mus musculus OX=10090	1:Experimental evidence at protein level	5-oxoprolinase	1	0.999	31	155	155	155	10	10	10	14	17	21	23	13	16	13	2	1	1	4	10	10	10	14	17	21	23	13	16	13	2	1	1	4	10	10	10	14	17	21	23
sp|Q8K0C4|CP51A_MOUSE	Q8K0C4	CP51A_MOUSE	Cyp51a1	503	21.3	Mus musculus OX=10090	1:Experimental evidence at protein level	Lanosterol 14-alpha demethylase	1	0.999	9	36	36	36	3	2	2	4	4	6	8	0	2	5	0	0	0	0	3	2	2	4	4	6	8	0	2	5	0	0	0	0	3	2	2	4	4	6	8
sp|Q8K0D5|EFGM_MOUSE	Q8K0D5	EFGM_MOUSE	Gfm1	751	8.9	Mus musculus OX=10090	1:Experimental evidence at protein level	Elongation factor G, mitochondrial	1	0.999	6	14	14	14	0	0	0	0	6	3	4	0	1	0	0	0	0	0	0	0	0	0	6	3	4	0	1	0	0	0	0	0	0	0	0	0	6	3	4
sp|Q8K0E8|FIBB_MOUSE	Q8K0E8	FIBB_MOUSE	Fgb	481	34.3	Mus musculus OX=10090	1:Experimental evidence at protein level	Fibrinogen beta chain	1	0.999	14	106	106	106	9	9	4	6	13	13	12	11	9	8	4	2	3	3	9	9	4	6	13	13	12	11	9	8	4	2	3	3	9	9	4	6	13	13	12
sp|Q8K0H1|S47A1_MOUSE	Q8K0H1	S47A1_MOUSE	Slc47a1	567	5.5	Mus musculus OX=10090	1:Experimental evidence at protein level	Multidrug and toxin extrusion protein 1	1	0.999	2	4	4	4	0	0	0	0	2	0	2	0	0	0	0	0	0	0	0	0	0	0	2	0	2	0	0	0	0	0	0	0	0	0	0	0	2	0	2
sp|Q8K0R6|GLTD2_MOUSE	Q8K0R6	GLTD2_MOUSE	Gltpd2	321	7.5	Mus musculus OX=10090	1:Experimental evidence at protein level	Glycolipid transfer protein domain-containing protein 2	1	0.999	2	3	3	3	0	0	0	1	1	0	0	0	1	0	0	0	0	0	0	0	0	1	1	0	0	0	1	0	0	0	0	0	0	0	0	1	1	0	0
sp|Q8K0Z7|TACO1_MOUSE	Q8K0Z7	TACO1_MOUSE	Taco1	294	8.8	Mus musculus OX=10090	1:Experimental evidence at protein level	Translational activator of cytochrome c oxidase 1	1	0.999	2	8	8	8	0	1	0	0	2	2	2	0	1	0	0	0	0	0	0	1	0	0	2	2	2	0	1	0	0	0	0	0	0	1	0	0	2	2	2
sp|Q8K157|GALM_MOUSE	Q8K157	GALM_MOUSE	Galm	342	15.5	Mus musculus OX=10090	1:Experimental evidence at protein level	Galactose mutarotase	1	0.999	4	23	23	23	2	1	2	1	4	3	2	2	3	3	0	0	0	0	2	1	2	1	4	3	2	2	3	3	0	0	0	0	2	1	2	1	4	3	2
sp|Q8K182|CO8A_MOUSE	Q8K182	CO8A_MOUSE	C8a	587	6	Mus musculus OX=10090	1:Experimental evidence at protein level	Complement component C8 alpha chain	1	0.999	2	7	7	7	0	0	0	0	2	2	3	0	0	0	0	0	0	0	0	0	0	0	2	2	3	0	0	0	0	0	0	0	0	0	0	0	2	2	3
sp|Q8K183|PDXK_MOUSE	Q8K183	PDXK_MOUSE	Pdxk	312	11.9	Mus musculus OX=10090	1:Experimental evidence at protein level	Pyridoxal kinase	1	0.999	3	17	17	17	1	1	0	0	3	4	3	3	1	1	0	0	0	0	1	1	0	0	3	4	3	3	1	1	0	0	0	0	1	1	0	0	3	4	3
sp|Q8K1M6|DNM1L_MOUSE	Q8K1M6	DNM1L_MOUSE	Dnm1l	742	9.6	Mus musculus OX=10090	1:Experimental evidence at protein level	Dynamin-1-like protein	1	0.999	6	20	20	20	2	2	0	1	4	3	4	1	1	1	0	0	1	0	2	2	0	1	4	3	4	1	1	1	0	0	1	0	2	2	0	1	4	3	4
sp|Q8K1R3|PNPT1_MOUSE	Q8K1R3	PNPT1_MOUSE	Pnpt1	783	6.5	Mus musculus OX=10090	1:Experimental evidence at protein level	Polyribonucleotide nucleotidyltransferase 1, mitochondrial	1	0.999	4	7	7	7	0	0	0	0	1	1	3	0	1	1	0	0	0	0	0	0	0	0	1	1	3	0	1	1	0	0	0	0	0	0	0	0	1	1	3
sp|Q8K1Z0|COQ9_MOUSE	Q8K1Z0	COQ9_MOUSE	Coq9	313	32.9	Mus musculus OX=10090	1:Experimental evidence at protein level	Ubiquinone biosynthesis protein COQ9, mitochondrial	1	0.999	9	85	85	85	5	4	5	5	12	11	11	5	6	8	3	3	3	4	5	4	5	5	12	11	11	5	6	8	3	3	3	4	5	4	5	5	12	11	11
sp|Q8K268|ABCF3_MOUSE	Q8K268	ABCF3_MOUSE	Abcf3	709	8.5	Mus musculus OX=10090	1:Experimental evidence at protein level	ATP-binding cassette sub-family F member 3	1	0.999	4	10	10	10	0	0	0	0	3	3	4	0	0	0	0	0	0	0	0	0	0	0	3	3	4	0	0	0	0	0	0	0	0	0	0	0	3	3	4
sp|Q8K273|EMC5_MOUSE	Q8K273	EMC5_MOUSE	Mmgt1	131	31.3	Mus musculus OX=10090	1:Experimental evidence at protein level	ER membrane protein complex subunit 5	1	0.999	3	13	13	13	1	1	0	1	3	4	2	0	1	0	0	0	0	0	1	1	0	1	3	4	2	0	1	0	0	0	0	0	1	1	0	1	3	4	2
sp|Q8K2B3|SDHA_MOUSE	Q8K2B3	SDHA_MOUSE	Sdha	664	52.1	Mus musculus OX=10090	1:Experimental evidence at protein level	Succinate dehydrogenase [ubiquinone] flavoprotein subunit, mitochondrial	1	0.999	28	263	263	263	21	20	20	20	33	30	26	15	23	15	10	8	10	12	21	20	20	20	33	30	26	15	23	15	10	8	10	12	21	20	20	20	33	30	26
sp|Q8K2C7|OS9_MOUSE	Q8K2C7	OS9_MOUSE	Os9	672	12.6	Mus musculus OX=10090	1:Experimental evidence at protein level	Protein	1	0.999	5	8	8	8	0	0	0	0	3	2	3	0	0	0	0	0	0	0	0	0	0	0	3	2	3	0	0	0	0	0	0	0	0	0	0	0	3	2	3
sp|Q8K2C9|HACD3_MOUSE	Q8K2C9	HACD3_MOUSE	Hacd3	362	14.6	Mus musculus OX=10090	1:Experimental evidence at protein level	Very-long-chain (3R)-3-hydroxyacyl-CoA dehydratase 3	1	0.999	5	33	33	33	1	1	1	4	2	4	3	3	3	3	2	2	2	2	1	1	1	4	2	4	3	3	3	3	2	2	2	2	1	1	1	4	2	4	3
sp|Q8K2I3|FMO2_MOUSE	Q8K2I3	FMO2_MOUSE	Fmo2	535	12	Mus musculus OX=10090	1:Experimental evidence at protein level	Dimethylaniline monooxygenase [N-oxide-forming] 2	1	0.999	4	5	5	5	0	0	0	2	0	1	0	2	0	0	0	0	0	0	0	0	0	2	0	1	0	2	0	0	0	0	0	0	0	0	0	2	0	1	0
sp|Q8K2Q9|SHOT1_MOUSE	Q8K2Q9	SHOT1_MOUSE	Shtn1	631	7.3	Mus musculus OX=10090	1:Experimental evidence at protein level	Shootin-1	1	0.999	2	3	3	3	0	0	0	0	0	1	2	0	0	0	0	0	0	0	0	0	0	0	0	1	2	0	0	0	0	0	0	0	0	0	0	0	0	1	2
sp|Q8K310|MATR3_MOUSE	Q8K310	MATR3_MOUSE	Matr3	846	15.4	Mus musculus OX=10090	1:Experimental evidence at protein level	Matrin-3	1	0.999	11	61	61	61	6	4	4	5	12	9	8	2	5	4	0	0	0	2	6	4	4	5	12	9	8	2	5	4	0	0	0	2	6	4	4	5	12	9	8
sp|Q8K370|ACD10_MOUSE	Q8K370	ACD10_MOUSE	Acad10	1069	13.1	Mus musculus OX=10090	1:Experimental evidence at protein level	Acyl-CoA dehydrogenase family member 10	1	0.999	12	36	36	36	1	3	1	1	7	6	5	2	5	5	0	0	0	0	1	3	1	1	7	6	5	2	5	5	0	0	0	0	1	3	1	1	7	6	5
sp|Q8K3J1|NDUS8_MOUSE	Q8K3J1	NDUS8_MOUSE	Ndufs8	212	25	Mus musculus OX=10090	1:Experimental evidence at protein level	NADH dehydrogenase [ubiquinone] iron-sulfur protein 8, mitochondrial	1	0.999	8	39	39	39	3	3	3	1	9	5	4	2	4	4	1	0	0	0	3	3	3	1	9	5	4	2	4	4	1	0	0	0	3	3	3	1	9	5	4
sp|Q8K3K7|PLCB_MOUSE	Q8K3K7	PLCB_MOUSE	Agpat2	278	16.2	Mus musculus OX=10090	1:Experimental evidence at protein level	1-acyl-sn-glycerol-3-phosphate acyltransferase beta	1	0.999	4	10	10	10	0	1	2	1	3	2	1	0	0	0	0	0	0	0	0	1	2	1	3	2	1	0	0	0	0	0	0	0	0	1	2	1	3	2	1
sp|Q8K411|PREP_MOUSE	Q8K411	PREP_MOUSE	Pitrm1	1036	9	Mus musculus OX=10090	1:Experimental evidence at protein level	Presequence protease, mitochondrial	1	0.999	7	14	14	14	1	0	0	0	5	2	4	0	1	1	0	0	0	0	1	0	0	0	5	2	4	0	1	1	0	0	0	0	1	0	0	0	5	2	4
sp|Q8K441|ABCA6_MOUSE	Q8K441	ABCA6_MOUSE	Abca6	1624	4.7	Mus musculus OX=10090	1:Experimental evidence at protein level	ATP-binding cassette sub-family A member 6	1	0.999	4	10	10	10	1	0	0	1	3	1	2	0	1	1	0	0	0	0	1	0	0	1	3	1	2	0	1	1	0	0	0	0	1	0	0	1	3	1	2
sp|Q8K4F5|ABHDB_MOUSE	Q8K4F5	ABHDB_MOUSE	Abhd11	307	14.7	Mus musculus OX=10090	1:Experimental evidence at protein level	Protein ABHD11	1	0.999	5	13	13	13	3	2	1	2	0	1	2	1	1	0	0	0	0	0	3	2	1	2	0	1	2	1	1	0	0	0	0	0	3	2	1	2	0	1	2
sp|Q8K4G5|ABLM1_MOUSE	Q8K4G5	ABLM1_MOUSE	Ablim1	861	8.9	Mus musculus OX=10090	1:Experimental evidence at protein level	Actin-binding LIM protein 1	1	0.999	4	7	7	7	0	0	0	0	2	2	2	0	1	0	0	0	0	0	0	0	0	0	2	2	2	0	1	0	0	0	0	0	0	0	0	0	2	2	2
sp|Q8K4H1|KFA_MOUSE	Q8K4H1	KFA_MOUSE	Afmid	305	15.7	Mus musculus OX=10090	1:Experimental evidence at protein level	Kynurenine formamidase	1	0.999	5	8	8	8	0	0	2	1	2	2	1	0	0	0	0	0	0	0	0	0	2	1	2	2	1	0	0	0	0	0	0	0	0	0	2	1	2	2	1
sp|Q8K4L3|SVIL_MOUSE	Q8K4L3	SVIL_MOUSE	Svil	2170	4.9	Mus musculus OX=10090	1:Experimental evidence at protein level	Supervillin	1	0.999	3	4	4	4	0	0	0	0	1	2	1	0	0	0	0	0	0	0	0	0	0	0	1	2	1	0	0	0	0	0	0	0	0	0	0	0	1	2	1
sp|Q8K4Z3|NNRE_MOUSE	Q8K4Z3	NNRE_MOUSE	Naxe	282	20.6	Mus musculus OX=10090	1:Experimental evidence at protein level	NAD(P)H-hydrate epimerase	1	0.999	4	21	21	21	2	2	2	2	2	1	1	2	2	2	0	1	1	1	2	2	2	2	2	1	1	2	2	2	0	1	1	1	2	2	2	2	2	1	1
sp|Q8K4Z5|SF3A1_MOUSE	Q8K4Z5	SF3A1_MOUSE	Sf3a1	791	14.2	Mus musculus OX=10090	1:Experimental evidence at protein level	Splicing factor 3A subunit 1	1	0.999	9	29	29	29	1	1	0	1	7	6	9	1	2	1	0	0	0	0	1	1	0	1	7	6	9	1	2	1	0	0	0	0	1	1	0	1	7	6	9
sp|Q8K5B2|MCFD2_MOUSE	Q8K5B2	MCFD2_MOUSE	Mcfd2	145	11.7	Mus musculus OX=10090	1:Experimental evidence at protein level	Multiple coagulation factor deficiency protein 2 homolog	1	0.999	2	14	14	14	1	1	1	1	1	1	1	2	2	2	1	0	0	0	1	1	1	1	1	1	1	2	2	2	1	0	0	0	1	1	1	1	1	1	1
sp|Q8QZR5|ALAT1_MOUSE	Q8QZR5	ALAT1_MOUSE	Gpt	496	40.5	Mus musculus OX=10090	1:Experimental evidence at protein level	Alanine aminotransferase 1	1	0.999	18	142	137	142	11	11	13	11	18	20	17	9	8	8	5	3	3	5	10	10	13	11	18	20	17	8	7	7	5	3	3	5	11	11	13	11	18	20	17
sp|Q8QZS1|HIBCH_MOUSE	Q8QZS1	HIBCH_MOUSE	Hibch	385	42.3	Mus musculus OX=10090	1:Experimental evidence at protein level	3-hydroxyisobutyryl-CoA hydrolase, mitochondrial	1	0.999	16	137	137	137	11	9	6	10	17	15	15	11	12	12	4	5	5	5	11	9	6	10	17	15	15	11	12	12	4	5	5	5	11	9	6	10	17	15	15
sp|Q8QZT1|THIL_MOUSE	Q8QZT1	THIL_MOUSE	Acat1	424	60.6	Mus musculus OX=10090	1:Experimental evidence at protein level	Acetyl-CoA acetyltransferase, mitochondrial	1	0.999	24	266	266	266	22	22	20	20	28	27	26	17	19	19	12	11	12	11	22	22	20	20	28	27	26	17	19	19	12	11	12	11	22	22	20	20	28	27	26
sp|Q8QZY1|EIF3L_MOUSE	Q8QZY1	EIF3L_MOUSE	Eif3l	564	20	Mus musculus OX=10090	1:Experimental evidence at protein level	Eukaryotic translation initiation factor 3 subunit L	1	0.999	11	44	44	44	4	1	3	4	5	6	7	4	4	4	1	0	0	1	4	1	3	4	5	6	7	4	4	4	1	0	0	1	4	1	3	4	5	6	7
sp|Q8QZY2|GLCTK_MOUSE	Q8QZY2	GLCTK_MOUSE	Glyctk	523	14.1	Mus musculus OX=10090	1:Experimental evidence at protein level	Glycerate kinase	1	0.999	6	38	38	38	3	3	3	3	5	3	4	3	5	5	0	0	1	0	3	3	3	3	5	3	4	3	5	5	0	0	1	0	3	3	3	3	5	3	4
sp|Q8R010|AIMP2_MOUSE	Q8R010	AIMP2_MOUSE	Aimp2	320	10.3	Mus musculus OX=10090	1:Experimental evidence at protein level	Aminoacyl tRNA synthase complex-interacting multifunctional protein 2	1	0.999	2	8	8	8	1	0	0	0	2	3	2	0	0	0	0	0	0	0	1	0	0	0	2	3	2	0	0	0	0	0	0	0	1	0	0	0	2	3	2
sp|Q8R035|ICT1_MOUSE	Q8R035	ICT1_MOUSE	Mrpl58	206	25.2	Mus musculus OX=10090	1:Experimental evidence at protein level	Peptidyl-tRNA hydrolase ICT1, mitochondrial	1	0.999	4	9	9	9	0	0	0	0	3	4	2	0	0	0	0	0	0	0	0	0	0	0	3	4	2	0	0	0	0	0	0	0	0	0	0	0	3	4	2
sp|Q8R081|HNRPL_MOUSE	Q8R081	HNRPL_MOUSE	Hnrnpl	586	32.4	Mus musculus OX=10090	1:Experimental evidence at protein level	Heterogeneous nuclear ribonucleoprotein L	1	0.999	12	56	56	56	5	4	3	3	10	10	11	4	2	4	0	0	0	0	5	4	3	3	10	10	11	4	2	4	0	0	0	0	5	4	3	3	10	10	11
sp|Q8R086|SUOX_MOUSE	Q8R086	SUOX_MOUSE	Suox	546	41.2	Mus musculus OX=10090	1:Experimental evidence at protein level	Sulfite oxidase, mitochondrial	1	0.999	17	135	135	135	9	10	9	9	15	17	14	11	11	11	5	3	5	6	9	10	9	9	15	17	14	11	11	11	5	3	5	6	9	10	9	9	15	17	14
sp|Q8R0F8|FAHD1_MOUSE	Q8R0F8	FAHD1_MOUSE	Fahd1	227	11.9	Mus musculus OX=10090	1:Experimental evidence at protein level	Acylpyruvase FAHD1, mitochondrial	1	0.999	3	13	13	13	1	1	2	1	3	2	3	0	0	0	0	0	0	0	1	1	2	1	3	2	3	0	0	0	0	0	0	0	1	1	2	1	3	2	3
sp|Q8R0F9|S14L4_MOUSE	Q8R0F9	S14L4_MOUSE	Sec14l4	403	37.7	Mus musculus OX=10090	1:Experimental evidence at protein level	SEC14-like protein 4	1	0.999	13	81	81	81	6	5	4	4	12	12	10	6	6	9	2	0	3	2	6	5	4	4	12	12	10	6	6	9	2	0	3	2	6	5	4	4	12	12	10
sp|Q8R0N6|HOT_MOUSE	Q8R0N6	HOT_MOUSE	Adhfe1	465	12	Mus musculus OX=10090	1:Experimental evidence at protein level	Hydroxyacid-oxoacid transhydrogenase, mitochondrial	1	0.999	4	16	16	16	0	0	1	1	3	3	2	3	2	1	0	0	0	0	0	0	1	1	3	3	2	3	2	1	0	0	0	0	0	0	1	1	3	3	2
sp|Q8R0V5|I23O2_MOUSE	Q8R0V5	I23O2_MOUSE	Ido2	405	13.6	Mus musculus OX=10090	1:Experimental evidence at protein level	Indoleamine 2,3-dioxygenase 2	1	0.999	5	18	18	18	2	2	1	1	2	4	3	0	2	1	0	0	0	0	2	2	1	1	2	4	3	0	2	1	0	0	0	0	2	2	1	1	2	4	3
sp|Q8R0W0|EPIPL_MOUSE	Q8R0W0	EPIPL_MOUSE	Eppk1	6548	22.2	Mus musculus OX=10090	1:Experimental evidence at protein level	Epiplakin	1	0.999	15	65	65	74	4	7	5	5	8	10	9	2	9	6	0	0	0	0	4	7	5	5	8	10	9	2	9	6	0	0	0	0	5	8	6	6	9	11	10
sp|Q8R0X7|SGPL1_MOUSE	Q8R0X7	SGPL1_MOUSE	Sgpl1	568	7.9	Mus musculus OX=10090	1:Experimental evidence at protein level	Sphingosine-1-phosphate lyase 1	1	0.999	6	9	9	9	0	0	0	1	2	2	3	1	0	0	0	0	0	0	0	0	0	1	2	2	3	1	0	0	0	0	0	0	0	0	0	1	2	2	3
sp|Q8R0Y8|S2542_MOUSE	Q8R0Y8	S2542_MOUSE	Slc25a42	318	21.4	Mus musculus OX=10090	1:Experimental evidence at protein level	Mitochondrial coenzyme A transporter SLC25A42	1	0.999	6	24	24	24	1	3	2	3	4	3	2	2	2	2	0	0	0	0	1	3	2	3	4	3	2	2	2	2	0	0	0	0	1	3	2	3	4	3	2
sp|Q8R104|SIR3_MOUSE	Q8R104	SIR3_MOUSE	Sirt3	334	16.2	Mus musculus OX=10090	1:Experimental evidence at protein level	NAD-dependent protein deacetylase sirtuin-3	1	0.999	4	10	10	10	0	0	0	0	4	3	3	0	0	0	0	0	0	0	0	0	0	0	4	3	3	0	0	0	0	0	0	0	0	0	0	0	4	3	3
sp|Q8R146|APEH_MOUSE	Q8R146	APEH_MOUSE	Apeh	732	22.7	Mus musculus OX=10090	1:Experimental evidence at protein level	Acylamino-acid-releasing enzyme	1	0.999	9	43	43	43	1	3	1	2	8	8	9	3	4	4	0	0	0	0	1	3	1	2	8	8	9	3	4	4	0	0	0	0	1	3	1	2	8	8	9
sp|Q8R151|ZNFX1_MOUSE	Q8R151	ZNFX1_MOUSE	Znfx1	1909	3.6	Mus musculus OX=10090	1:Experimental evidence at protein level	NFX1-type zinc finger-containing protein 1	1	0.9989	3	5	5	5	0	0	0	0	3	1	1	0	0	0	0	0	0	0	0	0	0	0	3	1	1	0	0	0	0	0	0	0	0	0	0	0	3	1	1
sp|Q8R164|BPHL_MOUSE	Q8R164	BPHL_MOUSE	Bphl	291	63.6	Mus musculus OX=10090	1:Experimental evidence at protein level	Valacyclovir hydrolase	1	0.999	20	173	173	173	17	15	13	16	21	17	19	13	12	14	6	3	4	3	17	15	13	16	21	17	19	13	12	14	6	3	4	3	17	15	13	16	21	17	19
sp|Q8R1B4|EIF3C_MOUSE	Q8R1B4	EIF3C_MOUSE	Eif3c	911	11.3	Mus musculus OX=10090	1:Experimental evidence at protein level	Eukaryotic translation initiation factor 3 subunit C	1	0.999	11	52	52	52	6	4	4	5	8	8	9	2	2	3	0	0	1	0	6	4	4	5	8	8	9	2	2	3	0	0	1	0	6	4	4	5	8	8	9
sp|Q8R1G2|CMBL_MOUSE	Q8R1G2	CMBL_MOUSE	Cmbl	245	60	Mus musculus OX=10090	1:Experimental evidence at protein level	Carboxymethylenebutenolidase homolog	1	0.999	11	54	54	54	3	3	4	5	8	12	7	2	2	3	1	0	1	3	3	3	4	5	8	12	7	2	2	3	1	0	1	3	3	3	4	5	8	12	7
sp|Q8R1I1|QCR9_MOUSE	Q8R1I1	QCR9_MOUSE	Uqcr10	64	50	Mus musculus OX=10090	1:Experimental evidence at protein level	Cytochrome b-c1 complex subunit 9	1	0.999	3	37	37	37	3	4	3	2	4	4	4	1	2	3	2	1	2	2	3	4	3	2	4	4	4	1	2	3	2	1	2	2	3	4	3	2	4	4	4
sp|Q8R1Q8|DC1L1_MOUSE	Q8R1Q8	DC1L1_MOUSE	Dync1li1	523	11.7	Mus musculus OX=10090	1:Experimental evidence at protein level	Cytoplasmic dynein 1 light intermediate chain 1	1	0.999	3	7	7	7	1	0	0	0	3	1	2	0	0	0	0	0	0	0	1	0	0	0	3	1	2	0	0	0	0	0	0	0	1	0	0	0	3	1	2
sp|Q8R1V4|TMED4_MOUSE	Q8R1V4	TMED4_MOUSE	Tmed4	227	26.4	Mus musculus OX=10090	1:Experimental evidence at protein level	Transmembrane emp24 domain-containing protein 4	1	0.999	4	25	25	25	1	2	3	3	2	3	2	2	3	2	0	0	1	1	1	2	3	3	2	3	2	2	3	2	0	0	1	1	1	2	3	3	2	3	2
sp|Q8R238|SDSL_MOUSE	Q8R238	SDSL_MOUSE	Sdsl	329	5.8	Mus musculus OX=10090	1:Experimental evidence at protein level	Serine dehydratase-like	1	0.999	2	4	4	4	1	0	0	0	2	0	1	0	0	0	0	0	0	0	1	0	0	0	2	0	1	0	0	0	0	0	0	0	1	0	0	0	2	0	1
sp|Q8R2Q4|RRF2M_MOUSE	Q8R2Q4	RRF2M_MOUSE	Gfm2	779	6.9	Mus musculus OX=10090	1:Experimental evidence at protein level	Ribosome-releasing factor 2, mitochondrial	1	0.999	2	4	4	4	0	0	0	0	1	1	2	0	0	0	0	0	0	0	0	0	0	0	1	1	2	0	0	0	0	0	0	0	0	0	0	0	1	1	2
sp|Q8R2Y0|ABHD6_MOUSE	Q8R2Y0	ABHD6_MOUSE	Abhd6	336	10.1	Mus musculus OX=10090	1:Experimental evidence at protein level	Monoacylglycerol lipase ABHD6	1	0.999	3	6	6	6	0	0	0	0	2	2	1	1	0	0	0	0	0	0	0	0	0	0	2	2	1	1	0	0	0	0	0	0	0	0	0	0	2	2	1
sp|Q8R2Y8|PTH2_MOUSE	Q8R2Y8	PTH2_MOUSE	Ptrh2	181	26	Mus musculus OX=10090	1:Experimental evidence at protein level	Peptidyl-tRNA hydrolase 2, mitochondrial	1	0.999	3	10	10	10	0	1	0	2	2	3	2	0	0	0	0	0	0	0	0	1	0	2	2	3	2	0	0	0	0	0	0	0	0	1	0	2	2	3	2
sp|Q8R317|UBQL1_MOUSE	Q8R317	UBQL1_MOUSE	Ubqln1	582	9.6	Mus musculus OX=10090	1:Experimental evidence at protein level	Ubiquilin-1	1	0.999	3	15	15	15	0	0	0	0	4	3	2	1	2	3	0	0	0	0	0	0	0	0	4	3	2	1	2	3	0	0	0	0	0	0	0	0	4	3	2
sp|Q8R4H2|ARHGC_MOUSE	Q8R4H2	ARHGC_MOUSE	Arhgef12	1543	3.1	Mus musculus OX=10090	1:Experimental evidence at protein level	Rho guanine nucleotide exchange factor 12	1	0.999	3	7	7	7	1	0	0	1	1	2	1	0	0	1	0	0	0	0	1	0	0	1	1	2	1	0	0	1	0	0	0	0	1	0	0	1	1	2	1
sp|Q8R4H7|NAGS_MOUSE	Q8R4H7	NAGS_MOUSE	Nags	527	13.1	Mus musculus OX=10090	1:Experimental evidence at protein level	N-acetylglutamate synthase, mitochondrial	1	0.999	5	14	14	14	0	0	0	1	2	2	2	1	3	3	0	0	0	0	0	0	0	1	2	2	2	1	3	3	0	0	0	0	0	0	0	1	2	2	2
sp|Q8R4N0|CLYBL_MOUSE	Q8R4N0	CLYBL_MOUSE	Clybl	338	28.7	Mus musculus OX=10090	1:Experimental evidence at protein level	Citramalyl-CoA lyase, mitochondrial	1	0.999	7	40	40	40	3	2	4	3	7	6	7	0	5	3	0	0	0	0	3	2	4	3	7	6	7	0	5	3	0	0	0	0	3	2	4	3	7	6	7
sp|Q8R4U0|STAB2_MOUSE	Q8R4U0	STAB2_MOUSE	Stab2	2559	1.1	Mus musculus OX=10090	1:Experimental evidence at protein level	Stabilin-2	1	0.999	2	8	8	8	0	0	1	1	2	2	2	0	0	0	0	0	0	0	0	0	1	1	2	2	2	0	0	0	0	0	0	0	0	0	1	1	2	2	2
sp|Q8R570|SNP47_MOUSE	Q8R570	SNP47_MOUSE	Snap47	413	9	Mus musculus OX=10090	1:Experimental evidence at protein level	Synaptosomal-associated protein 47	1	0.999	3	6	6	6	0	0	0	0	3	2	1	0	0	0	0	0	0	0	0	0	0	0	3	2	1	0	0	0	0	0	0	0	0	0	0	0	3	2	1
sp|Q8R5C5|ACTY_MOUSE	Q8R5C5	ACTY_MOUSE	Actr1b	376	27.4	Mus musculus OX=10090	1:Experimental evidence at protein level	Beta-centractin	1	0.999	7	7	7	19	0	0	0	0	1	2	3	1	0	0	0	0	0	0	0	0	0	0	1	2	3	1	0	0	0	0	0	0	1	1	1	2	3	4	4
sp|Q8R5H1|UBP15_MOUSE	Q8R5H1	UBP15_MOUSE	Usp15	981	4	Mus musculus OX=10090	1:Experimental evidence at protein level	Ubiquitin carboxyl-terminal hydrolase 15	1	0.999	3	4	4	4	0	0	1	0	2	1	0	0	0	0	0	0	0	0	0	0	1	0	2	1	0	0	0	0	0	0	0	0	0	0	1	0	2	1	0
sp|Q8R5I6|GSTM4_MOUSE	Q8R5I6	GSTM4_MOUSE	Gstm4	218	41.7	Mus musculus OX=10090	1:Experimental evidence at protein level	Glutathione S-transferase Mu 4	1	0.999	10	11	11	51	0	0	1	1	2	1	4	1	0	1	0	0	0	0	0	0	1	1	2	1	4	1	0	1	0	0	0	0	2	2	3	6	5	4	7
sp|Q8R5J9|PRAF3_MOUSE	Q8R5J9	PRAF3_MOUSE	Arl6ip5	188	9.6	Mus musculus OX=10090	1:Experimental evidence at protein level	PRA1 family protein 3	1	0.999	2	6	6	6	0	1	1	1	0	1	0	1	0	1	0	0	0	0	0	1	1	1	0	1	0	1	0	1	0	0	0	0	0	1	1	1	0	1	0
sp|Q8VBT2|SDHL_MOUSE	Q8VBT2	SDHL_MOUSE	Sds	327	57.8	Mus musculus OX=10090	1:Experimental evidence at protein level	L-serine dehydratase/L-threonine deaminase	1	0.999	14	75	75	75	8	6	8	1	13	6	8	0	9	4	4	0	3	5	8	6	8	1	13	6	8	0	9	4	4	0	3	5	8	6	8	1	13	6	8
sp|Q8VBV7|CSN8_MOUSE	Q8VBV7	CSN8_MOUSE	Cops8	209	27.3	Mus musculus OX=10090	1:Experimental evidence at protein level	COP9 signalosome complex subunit 8	1	0.999	3	6	6	6	0	0	0	0	2	1	2	0	0	1	0	0	0	0	0	0	0	0	2	1	2	0	0	1	0	0	0	0	0	0	0	0	2	1	2
sp|Q8VBW8|TTC36_MOUSE	Q8VBW8	TTC36_MOUSE	Ttc36	186	45.7	Mus musculus OX=10090	1:Experimental evidence at protein level	Tetratricopeptide repeat protein 36	1	0.999	9	93	93	93	6	6	7	8	9	8	8	10	7	9	3	3	4	5	6	6	7	8	9	8	8	10	7	9	3	3	4	5	6	6	7	8	9	8	8
sp|Q8VBZ3|CLPT1_MOUSE	Q8VBZ3	CLPT1_MOUSE	Clptm1	664	11.3	Mus musculus OX=10090	1:Experimental evidence at protein level	Cleft lip and palate transmembrane protein 1 homolog	1	0.999	3	6	6	6	0	0	0	0	1	2	3	0	0	0	0	0	0	0	0	0	0	0	1	2	3	0	0	0	0	0	0	0	0	0	0	0	1	2	3
sp|Q8VC12|HUTU_MOUSE	Q8VC12	HUTU_MOUSE	Uroc1	676	51	Mus musculus OX=10090	1:Experimental evidence at protein level	Urocanate hydratase	1	0.999	31	329	329	329	28	27	27	17	47	34	40	9	20	19	17	11	15	18	28	27	27	17	47	34	40	9	20	19	17	11	15	18	28	27	27	17	47	34	40
sp|Q8VC28|AK1CD_MOUSE	Q8VC28	AK1CD_MOUSE	Akr1c13	323	27.9	Mus musculus OX=10090	1:Experimental evidence at protein level	Aldo-keto reductase family 1 member C13	1	0.999	9	82	82	82	7	6	8	7	8	8	7	8	7	6	3	3	2	2	7	6	8	7	8	8	7	8	7	6	3	3	2	2	7	6	8	7	8	8	7
sp|Q8VC30|TKFC_MOUSE	Q8VC30	TKFC_MOUSE	Tkfc	578	74	Mus musculus OX=10090	1:Experimental evidence at protein level	Triokinase/FMN cyclase	1	0.999	31	320	320	320	25	25	27	23	36	34	33	17	22	21	16	12	13	16	25	25	27	23	36	34	33	17	22	21	16	12	13	16	25	25	27	23	36	34	33
sp|Q8VC52|RBPS2_MOUSE	Q8VC52	RBPS2_MOUSE	Rbpms2	206	15.5	Mus musculus OX=10090	1:Experimental evidence at protein level	RNA-binding protein with multiple splicing 2	1	0.999	2	6	6	6	0	0	0	0	2	2	2	0	0	0	0	0	0	0	0	0	0	0	2	2	2	0	0	0	0	0	0	0	0	0	0	0	2	2	2
sp|Q8VC97|BUP1_MOUSE	Q8VC97	BUP1_MOUSE	Upb1	393	10.4	Mus musculus OX=10090	1:Experimental evidence at protein level	Beta-ureidopropionase	1	0.999	3	22	22	22	2	1	1	1	2	1	3	3	2	3	1	0	1	1	2	1	1	1	2	1	3	3	2	3	1	0	1	1	2	1	1	1	2	1	3
sp|Q8VCC1|PGDH_MOUSE	Q8VCC1	PGDH_MOUSE	Hpgd	269	13.8	Mus musculus OX=10090	1:Experimental evidence at protein level	15-hydroxyprostaglandin dehydrogenase [NAD(+)]	1	0.999	3	8	8	8	0	0	0	0	1	3	2	2	0	0	0	0	0	0	0	0	0	0	1	3	2	2	0	0	0	0	0	0	0	0	0	0	1	3	2
sp|Q8VCC2|EST1_MOUSE	Q8VCC2	EST1_MOUSE	Ces1	565	53.1	Mus musculus OX=10090	1:Experimental evidence at protein level	Liver carboxylesterase 1	1	0.999	21	114	114	158	5	6	7	11	12	15	15	11	7	13	2	5	2	3	5	6	7	11	12	15	15	11	7	13	2	5	2	3	8	9	10	14	15	19	19
sp|Q8VCF0|MAVS_MOUSE	Q8VCF0	MAVS_MOUSE	Mavs	503	29.6	Mus musculus OX=10090	1:Experimental evidence at protein level	Mitochondrial antiviral-signaling protein	1	0.999	9	52	52	52	4	3	3	3	9	11	8	3	4	3	0	0	0	1	4	3	3	3	9	11	8	3	4	3	0	0	0	1	4	3	3	3	9	11	8
sp|Q8VCG4|CO8G_MOUSE	Q8VCG4	CO8G_MOUSE	C8g	202	19.3	Mus musculus OX=10090	1:Experimental evidence at protein level	Complement component C8 gamma chain	1	0.999	3	5	5	5	1	0	0	0	1	2	1	0	0	0	0	0	0	0	1	0	0	0	1	2	1	0	0	0	0	0	0	0	1	0	0	0	1	2	1
sp|Q8VCH0|THIKB_MOUSE	Q8VCH0	THIKB_MOUSE	Acaa1b	424	59.7	Mus musculus OX=10090	1:Experimental evidence at protein level	3-ketoacyl-CoA thiolase B, peroxisomal	1	0.999	19	183	72	183	11	12	13	15	20	19	18	16	13	13	8	11	7	7	4	5	5	6	11	10	10	6	3	5	2	3	1	1	11	12	13	15	20	19	18
sp|Q8VCH6|DHC24_MOUSE	Q8VCH6	DHC24_MOUSE	Dhcr24	516	7.9	Mus musculus OX=10090	1:Experimental evidence at protein level	Delta(24)-sterol reductase	1	0.999	4	20	20	20	2	1	1	2	4	3	3	2	1	1	0	0	0	0	2	1	1	2	4	3	3	2	1	1	0	0	0	0	2	1	1	2	4	3	3
sp|Q8VCH8|UBXN4_MOUSE	Q8VCH8	UBXN4_MOUSE	Ubxn4	506	5.9	Mus musculus OX=10090	1:Experimental evidence at protein level	UBX domain-containing protein 4	1	0.999	4	6	6	6	0	0	0	0	2	1	0	1	1	1	0	0	0	0	0	0	0	0	2	1	0	1	1	1	0	0	0	0	0	0	0	0	2	1	0
sp|Q8VCI5|PEX19_MOUSE	Q8VCI5	PEX19_MOUSE	Pex19	299	10	Mus musculus OX=10090	1:Experimental evidence at protein level	Peroxisomal biogenesis factor 19	1	0.999	2	10	10	10	0	0	0	0	3	3	2	1	0	1	0	0	0	0	0	0	0	0	3	3	2	1	0	1	0	0	0	0	0	0	0	0	3	3	2
sp|Q8VCM7|FIBG_MOUSE	Q8VCM7	FIBG_MOUSE	Fgg	436	41.5	Mus musculus OX=10090	1:Experimental evidence at protein level	Fibrinogen gamma chain	1	0.999	18	104	104	104	8	6	5	5	17	11	14	11	11	11	2	0	0	3	8	6	5	5	17	11	14	11	11	11	2	0	0	3	8	6	5	5	17	11	14
sp|Q8VCM8|NCLN_MOUSE	Q8VCM8	NCLN_MOUSE	Ncln	563	18.1	Mus musculus OX=10090	1:Experimental evidence at protein level	Nicalin	1	0.999	8	14	14	14	1	0	0	0	3	3	3	1	1	2	0	0	0	0	1	0	0	0	3	3	3	1	1	2	0	0	0	0	1	0	0	0	3	3	3
sp|Q8VCN5|CGL_MOUSE	Q8VCN5	CGL_MOUSE	Cth	398	64.1	Mus musculus OX=10090	1:Experimental evidence at protein level	Cystathionine gamma-lyase	1	0.999	18	174	174	174	12	15	14	14	21	12	14	10	12	11	11	7	11	10	12	15	14	14	21	12	14	10	12	11	11	7	11	10	12	15	14	14	21	12	14
sp|Q8VCR2|DHB13_MOUSE	Q8VCR2	DHB13_MOUSE	Hsd17b13	304	46.7	Mus musculus OX=10090	1:Experimental evidence at protein level	17-beta-hydroxysteroid dehydrogenase 13	1	0.999	14	100	75	100	10	10	11	4	13	6	12	0	8	4	6	1	7	8	7	7	8	2	11	5	10	0	6	3	5	0	5	6	10	10	11	4	13	6	12
sp|Q8VCR7|ABHEB_MOUSE	Q8VCR7	ABHEB_MOUSE	Abhd14b	210	45.2	Mus musculus OX=10090	1:Experimental evidence at protein level	Protein ABHD14B	1	0.999	8	89	89	89	7	8	8	6	10	12	10	5	7	7	3	0	3	3	7	8	8	6	10	12	10	5	7	7	3	0	3	3	7	8	8	6	10	12	10
sp|Q8VCT3|AMPB_MOUSE	Q8VCT3	AMPB_MOUSE	Rnpep	650	14.8	Mus musculus OX=10090	1:Experimental evidence at protein level	Aminopeptidase B	1	0.999	8	28	28	28	1	2	2	3	5	5	3	3	1	3	0	0	0	0	1	2	2	3	5	5	3	3	1	3	0	0	0	0	1	2	2	3	5	5	3
sp|Q8VCT4|EST1D_MOUSE	Q8VCT4	EST1D_MOUSE	Ces1d	565	63.9	Mus musculus OX=10090	1:Experimental evidence at protein level	Carboxylesterase 1D	1	0.999	33	348	308	348	19	20	22	28	42	44	41	24	24	27	16	14	13	14	17	18	19	26	38	40	37	21	21	24	13	11	11	12	19	20	22	28	42	44	41
sp|Q8VCU1|EST3B_MOUSE	Q8VCU1	EST3B_MOUSE	Ces3b	571	28.5	Mus musculus OX=10090	1:Experimental evidence at protein level	Carboxylesterase 3B	1	0.999	13	19	19	130	0	2	0	0	5	3	3	2	2	2	0	0	0	0	0	2	0	0	5	3	3	2	2	2	0	0	0	0	8	12	9	9	14	14	15
sp|Q8VCW8|ACSF2_MOUSE	Q8VCW8	ACSF2_MOUSE	Acsf2	615	47.5	Mus musculus OX=10090	1:Experimental evidence at protein level	Medium-chain acyl-CoA ligase ACSF2, mitochondrial	1	0.999	30	266	266	266	19	23	21	19	29	27	27	14	17	18	14	12	14	12	19	23	21	19	29	27	27	14	17	18	14	12	14	12	19	23	21	19	29	27	27
sp|Q8VCX1|AK1D1_MOUSE	Q8VCX1	AK1D1_MOUSE	Akr1d1	325	22.5	Mus musculus OX=10090	1:Experimental evidence at protein level	Aldo-keto reductase family 1 member D1	1	0.999	6	54	54	54	4	5	4	4	4	5	4	3	4	5	3	3	3	3	4	5	4	4	4	5	4	3	4	5	3	3	3	3	4	5	4	4	4	5	4
sp|Q8VCZ9|HYPDH_MOUSE	Q8VCZ9	HYPDH_MOUSE	Prodh2	456	33.8	Mus musculus OX=10090	1:Experimental evidence at protein level	Hydroxyproline dehydrogenase	1	0.999	15	79	79	79	11	9	9	6	11	12	12	2	2	2	0	0	1	2	11	9	9	6	11	12	12	2	2	2	0	0	1	2	11	9	9	6	11	12	12
sp|Q8VDC1|FYCO1_MOUSE	Q8VDC1	FYCO1_MOUSE	Fyco1	1437	1.5	Mus musculus OX=10090	1:Experimental evidence at protein level	FYVE and coiled-coil domain-containing protein 1	1	0.999	2	2	2	2	0	0	0	0	1	1	0	0	0	0	0	0	0	0	0	0	0	0	1	1	0	0	0	0	0	0	0	0	0	0	0	0	1	1	0
sp|Q8VDG5|PPCS_MOUSE	Q8VDG5	PPCS_MOUSE	Ppcs	311	13.2	Mus musculus OX=10090	1:Experimental evidence at protein level	Phosphopantothenate--cysteine ligase	1	0.999	4	11	11	11	0	0	0	1	3	2	2	1	1	1	0	0	0	0	0	0	0	1	3	2	2	1	1	1	0	0	0	0	0	0	0	1	3	2	2
sp|Q8VDG7|PAFA2_MOUSE	Q8VDG7	PAFA2_MOUSE	Pafah2	390	6.7	Mus musculus OX=10090	1:Experimental evidence at protein level	Platelet-activating factor acetylhydrolase 2, cytoplasmic	1	0.999	3	4	4	4	0	0	0	1	2	0	0	1	0	0	0	0	0	0	0	0	0	1	2	0	0	1	0	0	0	0	0	0	0	0	0	1	2	0	0
sp|Q8VDJ3|VIGLN_MOUSE	Q8VDJ3	VIGLN_MOUSE	Hdlbp	1268	48.5	Mus musculus OX=10090	1:Experimental evidence at protein level	Vigilin	1	0.999	55	374	374	374	27	33	26	27	46	48	48	23	35	30	8	5	7	11	27	33	26	27	46	48	48	23	35	30	8	5	7	11	27	33	26	27	46	48	48
sp|Q8VDK1|NIT1_MOUSE	Q8VDK1	NIT1_MOUSE	Nit1	323	21.7	Mus musculus OX=10090	1:Experimental evidence at protein level	Deaminated glutathione amidase	1	0.999	6	28	28	28	2	2	2	3	5	5	4	1	2	2	0	0	0	0	2	2	2	3	5	5	4	1	2	2	0	0	0	0	2	2	2	3	5	5	4
sp|Q8VDL4|ADPGK_MOUSE	Q8VDL4	ADPGK_MOUSE	Adpgk	496	10.3	Mus musculus OX=10090	1:Experimental evidence at protein level	ADP-dependent glucokinase	1	0.999	2	4	4	4	0	0	0	0	1	2	1	0	0	0	0	0	0	0	0	0	0	0	1	2	1	0	0	0	0	0	0	0	0	0	0	0	1	2	1
sp|Q8VDM4|PSMD2_MOUSE	Q8VDM4	PSMD2_MOUSE	Psmd2	908	30.4	Mus musculus OX=10090	1:Experimental evidence at protein level	26S proteasome non-ATPase regulatory subunit 2	1	0.999	26	134	134	134	10	7	11	13	19	16	18	13	8	12	2	1	2	2	10	7	11	13	19	16	18	13	8	12	2	1	2	2	10	7	11	13	19	16	18
sp|Q8VDM6|HNRL1_MOUSE	Q8VDM6	HNRL1_MOUSE	Hnrnpul1	859	7	Mus musculus OX=10090	1:Experimental evidence at protein level	Heterogeneous nuclear ribonucleoprotein U-like protein 1	1	0.999	6	9	9	9	0	0	0	0	3	3	3	0	0	0	0	0	0	0	0	0	0	0	3	3	3	0	0	0	0	0	0	0	0	0	0	0	3	3	3
sp|Q8VDP4|CCAR2_MOUSE	Q8VDP4	CCAR2_MOUSE	Ccar2	922	10.8	Mus musculus OX=10090	1:Experimental evidence at protein level	Cell cycle and apoptosis regulator protein 2	1	0.999	3	6	6	6	0	1	0	0	1	1	1	1	1	0	0	0	0	0	0	1	0	0	1	1	1	1	1	0	0	0	0	0	0	1	0	0	1	1	1
sp|Q8VDQ1|PTGR2_MOUSE	Q8VDQ1	PTGR2_MOUSE	Ptgr2	351	21.1	Mus musculus OX=10090	1:Experimental evidence at protein level	Prostaglandin reductase 2	1	0.999	4	15	15	15	2	1	2	1	3	2	1	1	2	0	0	0	0	0	2	1	2	1	3	2	1	1	2	0	0	0	0	0	2	1	2	1	3	2	1
sp|Q8VDQ8|SIR2_MOUSE	Q8VDQ8	SIR2_MOUSE	Sirt2	389	13.1	Mus musculus OX=10090	1:Experimental evidence at protein level	NAD-dependent protein deacetylase sirtuin-2	1	0.999	3	8	8	8	0	0	0	0	2	4	2	0	0	0	0	0	0	0	0	0	0	0	2	4	2	0	0	0	0	0	0	0	0	0	0	0	2	4	2
sp|Q8VDT9|RM50_MOUSE	Q8VDT9	RM50_MOUSE	Mrpl50	159	24.5	Mus musculus OX=10090	1:Experimental evidence at protein level	39S ribosomal protein L50, mitochondrial	1	0.999	2	7	7	7	1	0	1	0	2	1	2	0	0	0	0	0	0	0	1	0	1	0	2	1	2	0	0	0	0	0	0	0	1	0	1	0	2	1	2
sp|Q8VE22|RT23_MOUSE	Q8VE22	RT23_MOUSE	Mrps23	177	22	Mus musculus OX=10090	1:Experimental evidence at protein level	28S ribosomal protein S23, mitochondrial	1	0.999	3	6	6	6	0	1	0	0	2	1	2	0	0	0	0	0	0	0	0	1	0	0	2	1	2	0	0	0	0	0	0	0	0	1	0	0	2	1	2
sp|Q8VE37|RCC1_MOUSE	Q8VE37	RCC1_MOUSE	Rcc1	421	7.6	Mus musculus OX=10090	1:Experimental evidence at protein level	Regulator of chromosome condensation	1	0.999	2	6	6	6	0	0	0	0	3	2	1	0	0	0	0	0	0	0	0	0	0	0	3	2	1	0	0	0	0	0	0	0	0	0	0	0	3	2	1
sp|Q8VEK3|HNRPU_MOUSE	Q8VEK3	HNRPU_MOUSE	Hnrnpu	800	22.1	Mus musculus OX=10090	1:Experimental evidence at protein level	Heterogeneous nuclear ribonucleoprotein U	1	0.999	16	122	122	122	10	10	7	6	15	16	22	7	10	11	1	2	2	3	10	10	7	6	15	16	22	7	10	11	1	2	2	3	10	10	7	6	15	16	22
sp|Q8VEM8|MPCP_MOUSE	Q8VEM8	MPCP_MOUSE	Slc25a3	357	35.9	Mus musculus OX=10090	1:Experimental evidence at protein level	Phosphate carrier protein, mitochondrial	1	0.999	14	110	110	110	10	11	9	8	11	10	11	7	10	8	4	3	4	4	10	11	9	8	11	10	11	7	10	8	4	3	4	4	10	11	9	8	11	10	11
sp|Q8VH51|RBM39_MOUSE	Q8VH51	RBM39_MOUSE	Rbm39	530	14	Mus musculus OX=10090	1:Experimental evidence at protein level	RNA-binding protein 39	1	0.999	6	13	13	13	0	1	0	0	6	4	2	0	0	0	0	0	0	0	0	1	0	0	6	4	2	0	0	0	0	0	0	0	0	1	0	0	6	4	2
sp|Q8VHE0|SEC63_MOUSE	Q8VHE0	SEC63_MOUSE	Sec63	760	6.7	Mus musculus OX=10090	1:Experimental evidence at protein level	Translocation protein SEC63 homolog	1	0.999	4	19	19	19	2	2	2	2	4	3	4	0	0	0	0	0	0	0	2	2	2	2	4	3	4	0	0	0	0	0	0	0	2	2	2	2	4	3	4
sp|Q8VI47|MRP2_MOUSE	Q8VI47	MRP2_MOUSE	Abcc2	1543	6.8	Mus musculus OX=10090	1:Experimental evidence at protein level	ATP-binding cassette sub-family C member 2	1	0.999	9	28	28	28	2	1	1	5	5	6	5	2	0	1	0	0	0	0	2	1	1	5	5	6	5	2	0	1	0	0	0	0	2	1	1	5	5	6	5
sp|Q8VIJ6|SFPQ_MOUSE	Q8VIJ6	SFPQ_MOUSE	Sfpq	699	20.5	Mus musculus OX=10090	1:Experimental evidence at protein level	Splicing factor, proline- and glutamine-rich	1	0.999	12	70	58	70	5	5	6	4	10	11	10	4	3	4	1	1	2	4	4	4	5	3	9	10	9	3	2	3	1	1	1	3	5	5	6	4	10	11	10
sp|Q91V04|TRAM1_MOUSE	Q91V04	TRAM1_MOUSE	Tram1	374	4.8	Mus musculus OX=10090	1:Experimental evidence at protein level	Translocating chain-associated membrane protein 1	1	0.999	2	5	5	5	0	0	0	0	2	0	2	0	1	0	0	0	0	0	0	0	0	0	2	0	2	0	1	0	0	0	0	0	0	0	0	0	2	0	2
sp|Q91V41|RAB14_MOUSE	Q91V41	RAB14_MOUSE	Rab14	215	72.6	Mus musculus OX=10090	1:Experimental evidence at protein level	Ras-related protein Rab-14	1	0.999	15	88	88	88	7	8	7	7	7	10	9	9	5	8	4	1	3	3	7	8	7	7	7	10	9	9	5	8	4	1	3	3	7	8	7	7	7	10	9
sp|Q91V64|ISOC1_MOUSE	Q91V64	ISOC1_MOUSE	Isoc1	297	32	Mus musculus OX=10090	1:Experimental evidence at protein level	Isochorismatase domain-containing protein 1	1	0.999	8	47	47	47	4	5	6	6	6	4	5	3	3	4	0	0	0	1	4	5	6	6	6	4	5	3	3	4	0	0	0	1	4	5	6	6	6	4	5
sp|Q91V76|CK054_MOUSE	Q91V76	CK054_MOUSE		315	7.6	Mus musculus OX=10090	1:Experimental evidence at protein level	Ester hydrolase C11orf54 homolog	1	0.9986	3	10	10	10	0	1	1	1	1	1	1	1	2	1	0	0	0	0	0	1	1	1	1	1	1	1	2	1	0	0	0	0	0	1	1	1	1	1	1
sp|Q91V92|ACLY_MOUSE	Q91V92	ACLY_MOUSE	Acly	1091	38.5	Mus musculus OX=10090	1:Experimental evidence at protein level	ATP-citrate synthase	1	0.999	36	242	242	242	22	21	18	13	40	28	34	7	18	20	6	1	6	8	22	21	18	13	40	28	34	7	18	20	6	1	6	8	22	21	18	13	40	28	34
sp|Q91VA0|ACSM1_MOUSE	Q91VA0	ACSM1_MOUSE	Acsm1	573	45.5	Mus musculus OX=10090	1:Experimental evidence at protein level	Acyl-coenzyme A synthetase ACSM1, mitochondrial	1	0.999	20	192	184	192	14	12	13	16	24	24	20	14	20	14	6	6	4	5	13	12	12	15	23	23	19	13	20	13	6	6	4	5	14	12	13	16	24	24	20
sp|Q91VA6|PDIP2_MOUSE	Q91VA6	PDIP2_MOUSE	Poldip2	368	13.6	Mus musculus OX=10090	1:Experimental evidence at protein level	Polymerase delta-interacting protein 2	1	0.999	5	13	13	13	0	1	0	1	3	1	2	2	2	1	0	0	0	0	0	1	0	1	3	1	2	2	2	1	0	0	0	0	0	1	0	1	3	1	2
sp|Q91VC3|IF4A3_MOUSE	Q91VC3	IF4A3_MOUSE	Eif4a3	411	29.7	Mus musculus OX=10090	1:Experimental evidence at protein level	Eukaryotic initiation factor 4A-III	1	0.999	15	25	25	60	0	1	3	0	5	5	7	0	1	3	0	0	0	0	0	1	3	0	5	5	7	0	1	3	0	0	0	0	4	5	5	3	9	8	11
sp|Q91VD9|NDUS1_MOUSE	Q91VD9	NDUS1_MOUSE	Ndufs1	727	49.7	Mus musculus OX=10090	1:Experimental evidence at protein level	NADH-ubiquinone oxidoreductase 75 kDa subunit, mitochondrial	1	0.999	29	221	221	221	15	16	10	12	33	25	25	14	19	19	9	6	8	10	15	16	10	12	33	25	25	14	19	19	9	6	8	10	15	16	10	12	33	25	25
sp|Q91VF2|HNMT_MOUSE	Q91VF2	HNMT_MOUSE	Hnmt	295	13.6	Mus musculus OX=10090	1:Experimental evidence at protein level	Histamine N-methyltransferase	1	0.999	5	14	14	14	1	1	1	0	3	1	1	1	2	1	1	0	0	1	1	1	1	0	3	1	1	1	2	1	1	0	0	1	1	1	1	0	3	1	1
sp|Q91VH6|MEMO1_MOUSE	Q91VH6	MEMO1_MOUSE	Memo1	297	9.4	Mus musculus OX=10090	1:Experimental evidence at protein level	Protein MEMO1	1	0.999	3	5	5	5	0	0	1	0	1	1	1	1	0	0	0	0	0	0	0	0	1	0	1	1	1	1	0	0	0	0	0	0	0	0	1	0	1	1	1
sp|Q91VI7|RINI_MOUSE	Q91VI7	RINI_MOUSE	Rnh1	456	24.6	Mus musculus OX=10090	1:Experimental evidence at protein level	Ribonuclease inhibitor	1	0.999	9	62	62	62	5	6	4	7	8	7	8	4	3	5	1	0	1	3	5	6	4	7	8	7	8	4	3	5	1	0	1	3	5	6	4	7	8	7	8
sp|Q91VM9|IPYR2_MOUSE	Q91VM9	IPYR2_MOUSE	Ppa2	330	12.7	Mus musculus OX=10090	1:Experimental evidence at protein level	Inorganic pyrophosphatase 2, mitochondrial	1	0.999	4	7	7	7	0	0	0	0	2	1	1	0	2	1	0	0	0	0	0	0	0	0	2	1	1	0	2	1	0	0	0	0	0	0	0	0	2	1	1
sp|Q91VR2|ATPG_MOUSE	Q91VR2	ATPG_MOUSE	Atp5f1c	298	49	Mus musculus OX=10090	1:Experimental evidence at protein level	ATP synthase subunit gamma, mitochondrial	1	0.999	14	174	174	174	15	14	15	14	16	16	17	9	12	11	9	6	10	10	15	14	15	14	16	16	17	9	12	11	9	6	10	10	15	14	15	14	16	16	17
sp|Q91VR5|DDX1_MOUSE	Q91VR5	DDX1_MOUSE	Ddx1	740	20.5	Mus musculus OX=10090	1:Experimental evidence at protein level	ATP-dependent RNA helicase DDX1	1	0.999	13	41	41	41	3	2	0	4	4	6	6	6	6	4	0	0	0	0	3	2	0	4	4	6	6	6	6	4	0	0	0	0	3	2	0	4	4	6	6
sp|Q91VS7|MGST1_MOUSE	Q91VS7	MGST1_MOUSE	Mgst1	155	79.4	Mus musculus OX=10090	1:Experimental evidence at protein level	Microsomal glutathione S-transferase 1	1	0.999	8	121	121	121	7	8	8	11	15	20	14	6	6	8	5	5	4	4	7	8	8	11	15	20	14	6	6	8	5	5	4	4	7	8	8	11	15	20	14
sp|Q91VT4|CBR4_MOUSE	Q91VT4	CBR4_MOUSE	Cbr4	236	31.4	Mus musculus OX=10090	1:Experimental evidence at protein level	3-oxoacyl-[acyl-carrier-protein] reductase	1	0.999	6	42	42	42	5	4	3	4	6	5	4	2	1	2	2	1	2	1	5	4	3	4	6	5	4	2	1	2	2	1	2	1	5	4	3	4	6	5	4
sp|Q91VU6|DCA11_MOUSE	Q91VU6	DCA11_MOUSE	Dcaf11	549	13.7	Mus musculus OX=10090	1:Experimental evidence at protein level	DDB1- and CUL4-associated factor 11	1	0.999	5	13	13	13	0	0	0	0	5	4	4	0	0	0	0	0	0	0	0	0	0	0	5	4	4	0	0	0	0	0	0	0	0	0	0	0	5	4	4
sp|Q91VX2|UBAP2_MOUSE	Q91VX2	UBAP2_MOUSE	Ubap2	1132	3.2	Mus musculus OX=10090	1:Experimental evidence at protein level	Ubiquitin-associated protein 2	1	0.999	3	4	4	4	0	0	0	0	1	1	2	0	0	0	0	0	0	0	0	0	0	0	1	1	2	0	0	0	0	0	0	0	0	0	0	0	1	1	2
sp|Q91W43|GCSP_MOUSE	Q91W43	GCSP_MOUSE	Gldc	1025	25.6	Mus musculus OX=10090	1:Experimental evidence at protein level	Glycine dehydrogenase (decarboxylating), mitochondrial	1	0.999	21	113	113	113	10	14	10	4	20	13	16	0	7	8	4	0	2	5	10	14	10	4	20	13	16	0	7	8	4	0	2	5	10	14	10	4	20	13	16
sp|Q91W50|CSDE1_MOUSE	Q91W50	CSDE1_MOUSE	Csde1	798	14.9	Mus musculus OX=10090	1:Experimental evidence at protein level	Cold shock domain-containing protein E1	1	0.999	12	31	31	31	1	0	0	2	7	10	5	0	4	2	0	0	0	0	1	0	0	2	7	10	5	0	4	2	0	0	0	0	1	0	0	2	7	10	5
sp|Q91W64|CP270_MOUSE	Q91W64	CP270_MOUSE	Cyp2c70	489	34.2	Mus musculus OX=10090	1:Experimental evidence at protein level	Cytochrome P450 2C70	1	0.999	20	83	83	93	5	6	5	6	14	12	15	4	7	8	0	0	1	0	5	6	5	6	14	12	15	4	7	8	0	0	1	0	6	7	6	7	15	13	16
sp|Q91W90|TXND5_MOUSE	Q91W90	TXND5_MOUSE	Txndc5	417	26.1	Mus musculus OX=10090	1:Experimental evidence at protein level	Thioredoxin domain-containing protein 5	1	0.999	9	38	38	38	3	2	2	3	5	5	5	3	3	3	1	1	1	1	3	2	2	3	5	5	5	3	3	3	1	1	1	1	3	2	2	3	5	5	5
sp|Q91WC0|SETD3_MOUSE	Q91WC0	SETD3_MOUSE	Setd3	594	6.7	Mus musculus OX=10090	1:Experimental evidence at protein level	Actin-histidine N-methyltransferase	1	0.999	3	5	5	5	0	0	0	0	1	2	2	0	0	0	0	0	0	0	0	0	0	0	1	2	2	0	0	0	0	0	0	0	0	0	0	0	1	2	2
sp|Q91WD5|NDUS2_MOUSE	Q91WD5	NDUS2_MOUSE	Ndufs2	463	35.2	Mus musculus OX=10090	1:Experimental evidence at protein level	NADH dehydrogenase [ubiquinone] iron-sulfur protein 2, mitochondrial	1	0.999	13	71	71	71	5	7	9	6	10	8	10	2	8	4	1	0	0	1	5	7	9	6	10	8	10	2	8	4	1	0	0	1	5	7	9	6	10	8	10
sp|Q91WG8|GLCNE_MOUSE	Q91WG8	GLCNE_MOUSE	Gne	722	22.7	Mus musculus OX=10090	1:Experimental evidence at protein level	Bifunctional UDP-N-acetylglucosamine 2-epimerase/N-acetylmannosamine kinase	1	0.999	10	48	48	48	3	2	2	6	6	8	7	6	1	6	1	0	0	0	3	2	2	6	6	8	7	6	1	6	1	0	0	0	3	2	2	6	6	8	7
sp|Q91WJ8|FUBP1_MOUSE	Q91WJ8	FUBP1_MOUSE	Fubp1	651	17.2	Mus musculus OX=10090	1:Experimental evidence at protein level	Far upstream element-binding protein 1	1	0.999	8	9	9	15	0	0	0	0	2	3	2	2	0	0	0	0	0	0	0	0	0	0	2	3	2	2	0	0	0	0	0	0	0	0	1	1	3	3	2
sp|Q91WK0|LRRF2_MOUSE	Q91WK0	LRRF2_MOUSE	Lrrfip2	415	14.7	Mus musculus OX=10090	1:Experimental evidence at protein level	Leucine-rich repeat flightless-interacting protein 2	1	0.999	5	7	4	7	0	0	0	0	2	4	1	0	0	0	0	0	0	0	0	0	0	0	1	3	0	0	0	0	0	0	0	0	0	0	0	0	2	4	1
sp|Q91WK2|EIF3H_MOUSE	Q91WK2	EIF3H_MOUSE	Eif3h	352	28.4	Mus musculus OX=10090	1:Experimental evidence at protein level	Eukaryotic translation initiation factor 3 subunit H	1	0.999	8	24	24	24	1	4	3	2	3	2	4	1	1	3	0	0	0	0	1	4	3	2	3	2	4	1	1	3	0	0	0	0	1	4	3	2	3	2	4
sp|Q91WM2|HDHD5_MOUSE	Q91WM2	HDHD5_MOUSE	Hdhd5	419	11	Mus musculus OX=10090	1:Experimental evidence at protein level	Haloacid dehalogenase-like hydrolase domain-containing 5	1	0.999	4	11	11	11	0	0	1	1	2	1	3	0	1	2	0	0	0	0	0	0	1	1	2	1	3	0	1	2	0	0	0	0	0	0	1	1	2	1	3
sp|Q91WN4|KMO_MOUSE	Q91WN4	KMO_MOUSE	Kmo	479	19	Mus musculus OX=10090	1:Experimental evidence at protein level	Kynurenine 3-monooxygenase	1	0.999	10	68	68	68	4	4	5	6	5	4	3	8	6	7	4	4	4	4	4	4	5	6	5	4	3	8	6	7	4	4	4	4	4	4	5	6	5	4	3
sp|Q91WQ3|SYYC_MOUSE	Q91WQ3	SYYC_MOUSE	Yars1	528	25.2	Mus musculus OX=10090	1:Experimental evidence at protein level	Tyrosine--tRNA ligase, cytoplasmic	1	0.999	9	32	32	32	3	1	1	2	6	6	6	1	4	1	0	0	0	1	3	1	1	2	6	6	6	1	4	1	0	0	0	1	3	1	1	2	6	6	6
sp|Q91WS0|CISD1_MOUSE	Q91WS0	CISD1_MOUSE	Cisd1	108	52.8	Mus musculus OX=10090	1:Experimental evidence at protein level	CDGSH iron-sulfur domain-containing protein 1	1	0.999	4	51	51	51	5	6	5	5	4	5	6	3	4	4	1	0	2	1	5	6	5	5	4	5	6	3	4	4	1	0	2	1	5	6	5	5	4	5	6
sp|Q91WT9|CBS_MOUSE	Q91WT9	CBS_MOUSE	Cbs	561	47.6	Mus musculus OX=10090	1:Experimental evidence at protein level	Cystathionine beta-synthase	1	0.999	21	161	161	161	12	14	12	7	25	18	22	8	12	12	5	4	5	5	12	14	12	7	25	18	22	8	12	12	5	4	5	5	12	14	12	7	25	18	22
sp|Q91WU0|EST1F_MOUSE	Q91WU0	EST1F_MOUSE	Ces1f	561	50.3	Mus musculus OX=10090	1:Experimental evidence at protein level	Carboxylesterase 1F	1	0.999	23	171	132	185	12	11	13	12	21	23	20	15	12	11	3	6	7	5	9	8	10	9	18	19	15	12	9	9	2	3	5	4	13	12	14	13	22	24	21
sp|Q91WU5|AS3MT_MOUSE	Q91WU5	AS3MT_MOUSE	As3mt	376	33.8	Mus musculus OX=10090	1:Experimental evidence at protein level	Arsenite methyltransferase	1	0.999	11	54	54	54	4	4	3	4	8	9	7	5	5	5	0	0	0	0	4	4	3	4	8	9	7	5	5	5	0	0	0	0	4	4	3	4	8	9	7
sp|Q91X34|BAAT_MOUSE	Q91X34	BAAT_MOUSE	Baat	420	32.1	Mus musculus OX=10090	1:Experimental evidence at protein level	Bile acid-CoA:amino acid N-acyltransferase	1	0.999	12	69	69	69	7	4	3	4	10	5	10	4	3	5	4	3	4	3	7	4	3	4	10	5	10	4	3	5	4	3	4	3	7	4	3	4	10	5	10
sp|Q91X44|GCKR_MOUSE	Q91X44	GCKR_MOUSE	Gckr	587	37.5	Mus musculus OX=10090	1:Experimental evidence at protein level	Glucokinase regulatory protein	1	0.999	17	86	86	86	9	10	6	8	12	13	12	5	4	6	1	0	0	0	9	10	6	8	12	13	12	5	4	6	1	0	0	0	9	10	6	8	12	13	12
sp|Q91X52|DCXR_MOUSE	Q91X52	DCXR_MOUSE	Dcxr	244	18.4	Mus musculus OX=10090	1:Experimental evidence at protein level	L-xylulose reductase	1	0.999	3	7	7	7	0	0	1	0	3	2	1	0	0	0	0	0	0	0	0	0	1	0	3	2	1	0	0	0	0	0	0	0	0	0	1	0	3	2	1
sp|Q91X72|HEMO_MOUSE	Q91X72	HEMO_MOUSE	Hpx	460	10.9	Mus musculus OX=10090	1:Experimental evidence at protein level	Hemopexin	1	0.999	5	14	14	14	0	2	2	0	5	3	2	0	0	0	0	0	0	0	0	2	2	0	5	3	2	0	0	0	0	0	0	0	0	2	2	0	5	3	2
sp|Q91X77|CY250_MOUSE	Q91X77	CY250_MOUSE	Cyp2c50	490	51.4	Mus musculus OX=10090	1:Experimental evidence at protein level	Cytochrome P450 2C50	1	0.999	25	19	19	213	1	2	1	2	1	3	3	2	0	2	0	1	1	0	1	2	1	2	1	3	3	2	0	2	0	1	1	0	10	14	15	22	18	30	26
sp|Q91X83|METK1_MOUSE	Q91X83	METK1_MOUSE	Mat1a	396	50	Mus musculus OX=10090	1:Experimental evidence at protein level	S-adenosylmethionine synthase isoform type-1	1	0.999	19	227	186	227	15	18	19	21	23	22	27	12	15	12	13	10	10	10	12	15	15	17	20	19	23	10	13	10	9	7	8	8	15	18	19	21	23	22	27
sp|Q91X91|NADC_MOUSE	Q91X91	NADC_MOUSE	Qprt	299	40.1	Mus musculus OX=10090	1:Experimental evidence at protein level	Nicotinate-nucleotide pyrophosphorylase [carboxylating]	1	0.999	9	49	49	49	3	4	4	3	9	9	6	4	2	2	0	1	1	1	3	4	4	3	9	9	6	4	2	2	0	1	1	1	3	4	4	3	9	9	6
sp|Q91XD4|FTCD_MOUSE	Q91XD4	FTCD_MOUSE	Ftcd	541	69.5	Mus musculus OX=10090	1:Experimental evidence at protein level	Formimidoyltransferase-cyclodeaminase	1	0.999	29	208	208	208	16	20	18	10	29	20	27	7	19	16	7	2	6	11	16	20	18	10	29	20	27	7	19	16	7	2	6	11	16	20	18	10	29	20	27
sp|Q91XD6|VPS36_MOUSE	Q91XD6	VPS36_MOUSE	Vps36	386	9.3	Mus musculus OX=10090	1:Experimental evidence at protein level	Vacuolar protein-sorting-associated protein 36	1	0.999	3	12	12	12	1	1	0	0	2	4	3	0	1	0	0	0	0	0	1	1	0	0	2	4	3	0	1	0	0	0	0	0	1	1	0	0	2	4	3
sp|Q91XE0|GLYAT_MOUSE	Q91XE0	GLYAT_MOUSE	Glyat	296	60.1	Mus musculus OX=10090	1:Experimental evidence at protein level	Glycine N-acyltransferase	1	0.999	19	180	161	180	14	17	16	15	20	19	20	13	11	11	6	6	6	6	12	15	14	13	18	17	18	11	10	9	6	6	6	6	14	17	16	15	20	19	20
sp|Q91XE4|ACY3_MOUSE	Q91XE4	ACY3_MOUSE	Acy3	318	24.8	Mus musculus OX=10090	1:Experimental evidence at protein level	N-acyl-aromatic-L-amino acid amidohydrolase (carboxylate-forming)	1	0.999	6	21	21	21	1	1	0	0	6	4	3	1	2	2	1	0	0	0	1	1	0	0	6	4	3	1	2	2	1	0	0	0	1	1	0	0	6	4	3
sp|Q91XE8|TM205_MOUSE	Q91XE8	TM205_MOUSE	Tmem205	189	23.3	Mus musculus OX=10090	1:Experimental evidence at protein level	Transmembrane protein 205	1	0.999	5	47	47	47	3	3	3	3	3	5	3	4	3	5	3	3	3	3	3	3	3	3	3	5	3	4	3	5	3	3	3	3	3	3	3	3	3	5	3
sp|Q91XF0|PNPO_MOUSE	Q91XF0	PNPO_MOUSE	Pnpo	261	28.7	Mus musculus OX=10090	1:Experimental evidence at protein level	Pyridoxine-5'-phosphate oxidase	1	0.999	7	27	27	27	2	2	1	0	4	3	3	4	5	3	0	0	0	0	2	2	1	0	4	3	3	4	5	3	0	0	0	0	2	2	1	0	4	3	3
sp|Q91Y97|ALDOB_MOUSE	Q91Y97	ALDOB_MOUSE	Aldob	364	74.5	Mus musculus OX=10090	1:Experimental evidence at protein level	Fructose-bisphosphate aldolase B	1	0.999	32	574	560	574	42	47	37	37	84	74	82	21	26	26	27	23	25	23	41	46	36	36	83	73	81	20	25	25	26	22	24	22	42	47	37	37	84	74	82
sp|Q91YI0|ARLY_MOUSE	Q91YI0	ARLY_MOUSE	Asl	464	71.1	Mus musculus OX=10090	1:Experimental evidence at protein level	Argininosuccinate lyase	1	0.999	35	485	485	485	39	39	39	36	54	43	48	20	33	29	28	22	27	28	39	39	39	36	54	43	48	20	33	29	28	22	27	28	39	39	39	36	54	43	48
sp|Q91YM4|FAKD4_MOUSE	Q91YM4	FAKD4_MOUSE	Tbrg4	630	4.1	Mus musculus OX=10090	1:Experimental evidence at protein level	FAST kinase domain-containing protein 4	1	0.999	2	4	4	4	0	0	0	0	2	1	1	0	0	0	0	0	0	0	0	0	0	0	2	1	1	0	0	0	0	0	0	0	0	0	0	0	2	1	1
sp|Q91YP0|L2HDH_MOUSE	Q91YP0	L2HDH_MOUSE	L2hgdh	464	16.2	Mus musculus OX=10090	1:Experimental evidence at protein level	L-2-hydroxyglutarate dehydrogenase, mitochondrial	1	0.999	7	19	19	19	1	1	1	1	3	3	4	2	2	1	0	0	0	0	1	1	1	1	3	3	4	2	2	1	0	0	0	0	1	1	1	1	3	3	4
sp|Q91YP2|NEUL_MOUSE	Q91YP2	NEUL_MOUSE	Nln	704	5.4	Mus musculus OX=10090	1:Experimental evidence at protein level	Neurolysin, mitochondrial	1	0.999	2	2	2	2	0	0	0	0	0	1	0	1	0	0	0	0	0	0	0	0	0	0	0	1	0	1	0	0	0	0	0	0	0	0	0	0	0	1	0
sp|Q91YP3|DEOC_MOUSE	Q91YP3	DEOC_MOUSE	Dera	318	8.8	Mus musculus OX=10090	1:Experimental evidence at protein level	Deoxyribose-phosphate aldolase	1	0.999	2	17	17	17	2	2	2	2	2	2	2	1	1	1	0	0	0	0	2	2	2	2	2	2	2	1	1	1	0	0	0	0	2	2	2	2	2	2	2
sp|Q91YQ5|RPN1_MOUSE	Q91YQ5	RPN1_MOUSE	Rpn1	608	60.7	Mus musculus OX=10090	1:Experimental evidence at protein level	Dolichyl-diphosphooligosaccharide--protein glycosyltransferase subunit 1	1	0.999	33	275	275	275	21	22	21	22	32	27	30	13	15	17	17	11	12	15	21	22	21	22	32	27	30	13	15	17	17	11	12	15	21	22	21	22	32	27	30
sp|Q91YR7|PRP6_MOUSE	Q91YR7	PRP6_MOUSE	Prpf6	941	5.5	Mus musculus OX=10090	1:Experimental evidence at protein level	Pre-mRNA-processing factor 6	1	0.999	3	4	4	4	0	0	1	0	2	1	0	0	0	0	0	0	0	0	0	0	1	0	2	1	0	0	0	0	0	0	0	0	0	0	1	0	2	1	0
sp|Q91YT0|NDUV1_MOUSE	Q91YT0	NDUV1_MOUSE	Ndufv1	464	25.2	Mus musculus OX=10090	1:Experimental evidence at protein level	NADH dehydrogenase [ubiquinone] flavoprotein 1, mitochondrial	1	0.999	12	103	103	103	10	9	8	8	11	9	10	7	9	9	5	1	4	3	10	9	8	8	11	9	10	7	9	9	5	1	4	3	10	9	8	8	11	9	10
sp|Q91YT7|YTHD2_MOUSE	Q91YT7	YTHD2_MOUSE	Ythdf2	579	7.1	Mus musculus OX=10090	1:Experimental evidence at protein level	YTH domain-containing family protein 2	1	0.999	2	6	6	6	0	0	0	0	2	2	2	0	0	0	0	0	0	0	0	0	0	0	2	2	2	0	0	0	0	0	0	0	0	0	0	0	2	2	2
sp|Q91YW3|DNJC3_MOUSE	Q91YW3	DNJC3_MOUSE	Dnajc3	504	24.6	Mus musculus OX=10090	1:Experimental evidence at protein level	DnaJ homolog subfamily C member 3	1	0.999	13	55	55	55	2	4	3	3	9	6	7	3	8	5	3	0	1	1	2	4	3	3	9	6	7	3	8	5	3	0	1	1	2	4	3	3	9	6	7
sp|Q91YX5|LGAT1_MOUSE	Q91YX5	LGAT1_MOUSE	Lpgat1	370	5.7	Mus musculus OX=10090	1:Experimental evidence at protein level	Acyl-CoA:lysophosphatidylglycerol acyltransferase 1	1	0.999	2	8	8	8	0	0	0	2	2	2	2	0	0	0	0	0	0	0	0	0	0	2	2	2	2	0	0	0	0	0	0	0	0	0	0	2	2	2	2
sp|Q91Z53|GRHPR_MOUSE	Q91Z53	GRHPR_MOUSE	Grhpr	328	44.8	Mus musculus OX=10090	1:Experimental evidence at protein level	Glyoxylate reductase/hydroxypyruvate reductase	1	0.999	13	66	66	66	3	3	4	5	5	11	9	6	6	5	3	1	3	2	3	3	4	5	5	11	9	6	6	5	3	1	3	2	3	3	4	5	5	11	9
sp|Q91ZA3|PCCA_MOUSE	Q91ZA3	PCCA_MOUSE	Pcca	724	47.9	Mus musculus OX=10090	1:Experimental evidence at protein level	Propionyl-CoA carboxylase alpha chain, mitochondrial	1	0.999	30	250	250	250	19	22	21	16	26	25	26	16	22	18	12	5	11	11	19	22	21	16	26	25	26	16	22	18	12	5	11	11	19	22	21	16	26	25	26
sp|Q91ZJ5|UGPA_MOUSE	Q91ZJ5	UGPA_MOUSE	Ugp2	508	60.2	Mus musculus OX=10090	1:Experimental evidence at protein level	UTP--glucose-1-phosphate uridylyltransferase	1	0.999	28	284	284	284	21	22	23	21	31	28	29	20	22	20	12	9	10	16	21	22	23	21	31	28	29	20	22	20	12	9	10	16	21	22	23	21	31	28	29
sp|Q91ZV0|MIA2_MOUSE	Q91ZV0	MIA2_MOUSE	Mia2	1396	14	Mus musculus OX=10090	1:Experimental evidence at protein level	Melanoma inhibitory activity protein 2	1	0.999	17	61	61	61	1	3	3	5	12	16	8	4	5	4	0	0	0	0	1	3	3	5	12	16	8	4	5	4	0	0	0	0	1	3	3	5	12	16	8
sp|Q91ZX7|LRP1_MOUSE	Q91ZX7	LRP1_MOUSE	Lrp1	4545	7	Mus musculus OX=10090	1:Experimental evidence at protein level	Prolow-density lipoprotein receptor-related protein 1	1	0.999	26	121	119	121	6	7	9	9	18	18	17	8	13	13	1	0	1	1	6	7	8	9	18	18	17	8	13	12	1	0	1	1	6	7	9	9	18	18	17
sp|Q920A5|RISC_MOUSE	Q920A5	RISC_MOUSE	Scpep1	452	5.3	Mus musculus OX=10090	1:Experimental evidence at protein level	Retinoid-inducible serine carboxypeptidase	1	0.999	3	13	13	13	0	1	0	1	2	2	2	2	0	2	0	1	0	0	0	1	0	1	2	2	2	2	0	2	0	1	0	0	0	1	0	1	2	2	2
sp|Q920A7|AFG31_MOUSE	Q920A7	AFG31_MOUSE	Afg3l1	789	7.9	Mus musculus OX=10090	1:Experimental evidence at protein level	AFG3-like protein 1	1	0.9983	6	6	6	17	0	0	0	1	1	3	1	0	0	0	0	0	0	0	0	0	0	1	1	3	1	0	0	0	0	0	0	0	1	2	2	2	2	4	2
sp|Q920B9|SP16H_MOUSE	Q920B9	SP16H_MOUSE	Supt16h	1047	5.1	Mus musculus OX=10090	1:Experimental evidence at protein level	FACT complex subunit SPT16	1	0.999	5	8	8	8	0	1	0	0	2	2	3	0	0	0	0	0	0	0	0	1	0	0	2	2	3	0	0	0	0	0	0	0	0	1	0	0	2	2	3
sp|Q920E5|FPPS_MOUSE	Q920E5	FPPS_MOUSE	Fdps	353	32.6	Mus musculus OX=10090	1:Experimental evidence at protein level	Farnesyl pyrophosphate synthase	1	0.999	13	130	130	130	9	9	9	12	12	12	10	9	10	11	7	6	6	8	9	9	9	12	12	12	10	9	10	11	7	6	6	8	9	9	9	12	12	12	10
sp|Q920L1|FADS1_MOUSE	Q920L1	FADS1_MOUSE	Fads1	447	16.1	Mus musculus OX=10090	1:Experimental evidence at protein level	Acyl-CoA (8-3)-desaturase	1	0.999	7	19	19	19	2	0	2	3	2	4	2	1	2	1	0	0	0	0	2	0	2	3	2	4	2	1	2	1	0	0	0	0	2	0	2	3	2	4	2
sp|Q920R0|ALS2_MOUSE	Q920R0	ALS2_MOUSE	Als2	1651	2.4	Mus musculus OX=10090	1:Experimental evidence at protein level	Alsin	1	0.999	2	4	4	4	0	0	0	0	0	1	1	0	1	1	0	0	0	0	0	0	0	0	0	1	1	0	1	1	0	0	0	0	0	0	0	0	0	1	1
sp|Q921F2|TADBP_MOUSE	Q921F2	TADBP_MOUSE	Tardbp	414	18.4	Mus musculus OX=10090	1:Experimental evidence at protein level	TAR DNA-binding protein 43	1	0.999	7	43	43	43	4	5	3	3	6	5	5	5	2	4	0	0	1	0	4	5	3	3	6	5	5	5	2	4	0	0	1	0	4	5	3	3	6	5	5
sp|Q921F4|HNRLL_MOUSE	Q921F4	HNRLL_MOUSE	Hnrnpll	591	6.9	Mus musculus OX=10090	1:Experimental evidence at protein level	Heterogeneous nuclear ribonucleoprotein L-like	1	0.999	3	8	8	8	0	1	0	1	1	3	2	0	0	0	0	0	0	0	0	1	0	1	1	3	2	0	0	0	0	0	0	0	0	1	0	1	1	3	2
sp|Q921G7|ETFD_MOUSE	Q921G7	ETFD_MOUSE	Etfdh	616	40.9	Mus musculus OX=10090	1:Experimental evidence at protein level	Electron transfer flavoprotein-ubiquinone oxidoreductase, mitochondrial	1	0.999	23	191	191	191	14	15	15	15	20	21	22	15	13	14	7	6	7	7	14	15	15	15	20	21	22	15	13	14	7	6	7	7	14	15	15	15	20	21	22
sp|Q921H8|THIKA_MOUSE	Q921H8	THIKA_MOUSE	Acaa1a	424	57.5	Mus musculus OX=10090	1:Experimental evidence at protein level	3-ketoacyl-CoA thiolase A, peroxisomal	1	0.999	18	67	67	178	6	6	7	6	7	9	8	5	4	4	1	1	2	1	6	6	7	6	7	9	8	5	4	4	1	1	2	1	13	13	15	15	16	18	16
sp|Q921H9|COA7_MOUSE	Q921H9	COA7_MOUSE	Coa7	231	13.4	Mus musculus OX=10090	1:Experimental evidence at protein level	Cytochrome c oxidase assembly factor 7	1	0.999	3	6	6	6	0	0	0	0	0	1	2	1	1	1	0	0	0	0	0	0	0	0	0	1	2	1	1	1	0	0	0	0	0	0	0	0	0	1	2
sp|Q921L3|TMCO1_MOUSE	Q921L3	TMCO1_MOUSE	Tmco1	188	17	Mus musculus OX=10090	1:Experimental evidence at protein level	Calcium load-activated calcium channel	1	0.999	4	14	14	14	0	2	1	0	2	3	2	2	1	1	0	0	0	0	0	2	1	0	2	3	2	2	1	1	0	0	0	0	0	2	1	0	2	3	2
sp|Q921M3|SF3B3_MOUSE	Q921M3	SF3B3_MOUSE	Sf3b3	1217	9.8	Mus musculus OX=10090	1:Experimental evidence at protein level	Splicing factor 3B subunit 3	1	0.999	10	29	29	29	2	2	2	2	6	6	5	1	1	2	0	0	0	0	2	2	2	2	6	6	5	1	1	2	0	0	0	0	2	2	2	2	6	6	5
sp|Q921M4|GOGA2_MOUSE	Q921M4	GOGA2_MOUSE	Golga2	999	6.5	Mus musculus OX=10090	1:Experimental evidence at protein level	Golgin subfamily A member 2	1	0.999	5	12	12	12	0	1	0	1	4	3	2	0	1	0	0	0	0	0	0	1	0	1	4	3	2	0	1	0	0	0	0	0	0	1	0	1	4	3	2
sp|Q921S7|RM37_MOUSE	Q921S7	RM37_MOUSE	Mrpl37	423	12.1	Mus musculus OX=10090	1:Experimental evidence at protein level	39S ribosomal protein L37, mitochondrial	1	0.999	4	8	8	8	0	1	0	0	2	2	3	0	0	0	0	0	0	0	0	1	0	0	2	2	3	0	0	0	0	0	0	0	0	1	0	0	2	2	3
sp|Q921T2|TOIP1_MOUSE	Q921T2	TOIP1_MOUSE	Tor1aip1	595	16.5	Mus musculus OX=10090	1:Experimental evidence at protein level	Torsin-1A-interacting protein 1	1	0.999	7	11	11	11	0	0	0	0	3	3	5	0	0	0	0	0	0	0	0	0	0	0	3	3	5	0	0	0	0	0	0	0	0	0	0	0	3	3	5
sp|Q921X9|PDIA5_MOUSE	Q921X9	PDIA5_MOUSE	Pdia5	517	35	Mus musculus OX=10090	1:Experimental evidence at protein level	Protein disulfide-isomerase A5	1	0.999	19	109	109	109	8	10	9	11	16	14	13	6	10	8	1	0	1	2	8	10	9	11	16	14	13	6	10	8	1	0	1	2	8	10	9	11	16	14	13
sp|Q922B2|SYDC_MOUSE	Q922B2	SYDC_MOUSE	Dars1	501	47.3	Mus musculus OX=10090	1:Experimental evidence at protein level	Aspartate--tRNA ligase, cytoplasmic	1	0.999	22	157	157	157	12	11	10	13	19	22	21	13	12	11	3	2	4	4	12	11	10	13	19	22	21	13	12	11	3	2	4	4	12	11	10	13	19	22	21
sp|Q922E4|PCY2_MOUSE	Q922E4	PCY2_MOUSE	Pcyt2	404	30.2	Mus musculus OX=10090	1:Experimental evidence at protein level	Ethanolamine-phosphate cytidylyltransferase	1	0.999	12	41	41	41	1	2	1	2	13	8	7	2	2	3	0	0	0	0	1	2	1	2	13	8	7	2	2	3	0	0	0	0	1	2	1	2	13	8	7
sp|Q922H4|GMPPA_MOUSE	Q922H4	GMPPA_MOUSE	Gmppa	420	19	Mus musculus OX=10090	1:Experimental evidence at protein level	Mannose-1-phosphate guanyltransferase alpha	1	0.999	4	9	9	9	1	1	0	0	2	3	2	0	0	0	0	0	0	0	1	1	0	0	2	3	2	0	0	0	0	0	0	0	1	1	0	0	2	3	2
sp|Q922Q8|LRC59_MOUSE	Q922Q8	LRC59_MOUSE	Lrrc59	307	29	Mus musculus OX=10090	1:Experimental evidence at protein level	Leucine-rich repeat-containing protein 59	1	0.999	8	45	45	45	3	2	2	3	6	5	6	4	4	4	2	2	1	1	3	2	2	3	6	5	6	4	4	4	2	2	1	1	3	2	2	3	6	5	6
sp|Q922R8|PDIA6_MOUSE	Q922R8	PDIA6_MOUSE	Pdia6	440	45.2	Mus musculus OX=10090	1:Experimental evidence at protein level	Protein disulfide-isomerase A6	1	0.999	17	129	129	129	7	8	8	9	13	12	16	10	11	12	9	4	4	6	7	8	8	9	13	12	16	10	11	12	9	4	4	6	7	8	8	9	13	12	16
sp|Q922Y1|UBXN1_MOUSE	Q922Y1	UBXN1_MOUSE	Ubxn1	297	23.9	Mus musculus OX=10090	1:Experimental evidence at protein level	UBX domain-containing protein 1	1	0.999	5	23	23	23	2	1	1	1	2	6	6	1	1	2	0	0	0	0	2	1	1	1	2	6	6	1	1	2	0	0	0	0	2	1	1	1	2	6	6
sp|Q923B6|STEA4_MOUSE	Q923B6	STEA4_MOUSE	Steap4	470	18.9	Mus musculus OX=10090	1:Experimental evidence at protein level	Metalloreductase STEAP4	1	0.999	7	28	28	28	3	2	3	3	4	3	1	2	3	3	0	0	0	1	3	2	3	3	4	3	1	2	3	3	0	0	0	1	3	2	3	3	4	3	1
sp|Q923D2|BLVRB_MOUSE	Q923D2	BLVRB_MOUSE	Blvrb	206	50	Mus musculus OX=10090	1:Experimental evidence at protein level	Flavin reductase (NADPH)	1	0.999	8	39	39	39	4	3	3	4	4	6	5	3	2	2	1	0	1	1	4	3	3	4	4	6	5	3	2	2	1	0	1	1	4	3	3	4	4	6	5
sp|Q924T2|RT02_MOUSE	Q924T2	RT02_MOUSE	Mrps2	291	9.6	Mus musculus OX=10090	1:Experimental evidence at protein level	28S ribosomal protein S2, mitochondrial	1	0.999	2	4	4	4	0	0	0	0	1	1	2	0	0	0	0	0	0	0	0	0	0	0	1	1	2	0	0	0	0	0	0	0	0	0	0	0	1	1	2
sp|Q924Y0|BODG_MOUSE	Q924Y0	BODG_MOUSE	Bbox1	387	12.9	Mus musculus OX=10090	1:Experimental evidence at protein level	Gamma-butyrobetaine dioxygenase	1	0.999	5	43	43	43	4	4	4	4	6	4	4	3	5	4	0	0	0	1	4	4	4	4	6	4	4	3	5	4	0	0	0	1	4	4	4	4	6	4	4
sp|Q924Z4|CERS2_MOUSE	Q924Z4	CERS2_MOUSE	Cers2	380	6.6	Mus musculus OX=10090	1:Experimental evidence at protein level	Ceramide synthase 2	1	0.999	2	12	12	12	1	1	1	1	2	1	1	1	1	1	1	0	0	0	1	1	1	1	2	1	1	1	1	1	1	0	0	0	1	1	1	1	2	1	1
sp|Q925I1|ATAD3_MOUSE	Q925I1	ATAD3_MOUSE	Atad3	591	35.2	Mus musculus OX=10090	1:Experimental evidence at protein level	ATPase family AAA domain-containing protein 3	1	0.999	20	82	82	82	5	7	8	5	14	10	8	5	10	8	1	0	1	0	5	7	8	5	14	10	8	5	10	8	1	0	1	0	5	7	8	5	14	10	8
sp|Q925N0|SFXN5_MOUSE	Q925N0	SFXN5_MOUSE	Sfxn5	342	20.8	Mus musculus OX=10090	1:Experimental evidence at protein level	Sideroflexin-5	1	0.999	5	13	13	13	1	1	1	0	5	1	4	0	0	0	0	0	0	0	1	1	1	0	5	1	4	0	0	0	0	0	0	0	1	1	1	0	5	1	4
sp|Q925N2|SFXN2_MOUSE	Q925N2	SFXN2_MOUSE	Sfxn2	322	22	Mus musculus OX=10090	1:Experimental evidence at protein level	Sideroflexin-2	1	0.999	7	36	36	36	3	4	4	4	6	4	4	2	1	2	0	0	1	1	3	4	4	4	6	4	4	2	1	2	0	0	1	1	3	4	4	4	6	4	4
sp|Q93092|TALDO_MOUSE	Q93092	TALDO_MOUSE	Taldo1	337	41.2	Mus musculus OX=10090	1:Experimental evidence at protein level	Transaldolase	1	0.999	17	107	107	107	8	9	6	9	12	12	12	7	9	13	2	1	4	3	8	9	6	9	12	12	12	7	9	13	2	1	4	3	8	9	6	9	12	12	12
sp|Q99020|ROAA_MOUSE	Q99020	ROAA_MOUSE	Hnrnpab	285	12.3	Mus musculus OX=10090	1:Experimental evidence at protein level	Heterogeneous nuclear ribonucleoprotein A/B	1	0.999	3	30	30	30	2	2	3	3	4	3	3	3	2	2	0	0	1	2	2	2	3	3	4	3	3	3	2	2	0	0	1	2	2	2	3	3	4	3	3
sp|Q99J39|DCMC_MOUSE	Q99J39	DCMC_MOUSE	Mlycd	492	24.8	Mus musculus OX=10090	1:Experimental evidence at protein level	Malonyl-CoA decarboxylase, mitochondrial	1	0.999	9	51	51	51	5	5	4	4	5	5	5	3	4	5	1	1	2	2	5	5	4	4	5	5	5	3	4	5	1	1	2	2	5	5	4	4	5	5	5
sp|Q99J99|THTM_MOUSE	Q99J99	THTM_MOUSE	Mpst	297	38.4	Mus musculus OX=10090	1:Experimental evidence at protein level	3-mercaptopyruvate sulfurtransferase	1	0.999	11	69	69	73	9	7	10	8	7	7	5	1	4	2	1	1	4	3	9	7	10	8	7	7	5	1	4	2	1	1	4	3	9	7	10	8	8	8	7
sp|Q99JB2|STML2_MOUSE	Q99JB2	STML2_MOUSE	Stoml2	353	25.8	Mus musculus OX=10090	1:Experimental evidence at protein level	Stomatin-like protein 2, mitochondrial	1	0.999	8	46	46	46	3	3	4	4	5	4	5	5	6	7	0	0	0	0	3	3	4	4	5	4	5	5	6	7	0	0	0	0	3	3	4	4	5	4	5
sp|Q99JB8|PACN3_MOUSE	Q99JB8	PACN3_MOUSE	Pacsin3	424	19.1	Mus musculus OX=10090	1:Experimental evidence at protein level	Protein kinase C and casein kinase II substrate protein 3	1	0.999	6	20	20	20	0	1	0	0	5	6	4	2	1	1	0	0	0	0	0	1	0	0	5	6	4	2	1	1	0	0	0	0	0	1	0	0	5	6	4
sp|Q99JI4|PSMD6_MOUSE	Q99JI4	PSMD6_MOUSE	Psmd6	389	37.5	Mus musculus OX=10090	1:Experimental evidence at protein level	26S proteasome non-ATPase regulatory subunit 6	1	0.999	13	61	61	61	3	5	4	8	8	8	8	5	5	5	0	0	1	1	3	5	4	8	8	8	8	5	5	5	0	0	1	1	3	5	4	8	8	8	8
sp|Q99JR1|SFXN1_MOUSE	Q99JR1	SFXN1_MOUSE	Sfxn1	322	56.8	Mus musculus OX=10090	1:Experimental evidence at protein level	Sideroflexin-1	1	0.999	14	105	105	105	10	11	11	5	11	10	11	0	7	10	5	1	6	7	10	11	11	5	11	10	11	0	7	10	5	1	6	7	10	11	11	5	11	10	11
sp|Q99JT9|MTND_MOUSE	Q99JT9	MTND_MOUSE	Adi1	179	15.1	Mus musculus OX=10090	1:Experimental evidence at protein level	1,2-dihydroxy-3-keto-5-methylthiopentene dioxygenase	1	0.999	2	6	6	6	0	0	0	0	1	2	1	0	1	1	0	0	0	0	0	0	0	0	1	2	1	0	1	1	0	0	0	0	0	0	0	0	1	2	1
sp|Q99JW2|ACY1_MOUSE	Q99JW2	ACY1_MOUSE	Acy1	408	17.2	Mus musculus OX=10090	1:Experimental evidence at protein level	Aminoacylase-1	1	0.999	3	7	7	7	0	0	0	0	1	2	2	0	1	1	0	0	0	0	0	0	0	0	1	2	2	0	1	1	0	0	0	0	0	0	0	0	1	2	2
sp|Q99JX4|EIF3M_MOUSE	Q99JX4	EIF3M_MOUSE	Eif3m	374	12.8	Mus musculus OX=10090	1:Experimental evidence at protein level	Eukaryotic translation initiation factor 3 subunit M	1	0.999	2	3	3	3	0	0	0	0	0	2	1	0	0	0	0	0	0	0	0	0	0	0	0	2	1	0	0	0	0	0	0	0	0	0	0	0	0	2	1
sp|Q99JY0|ECHB_MOUSE	Q99JY0	ECHB_MOUSE	Hadhb	475	66.5	Mus musculus OX=10090	1:Experimental evidence at protein level	Trifunctional enzyme subunit beta, mitochondrial	1	0.999	27	286	286	286	18	18	20	22	30	30	28	24	20	21	15	13	13	14	18	18	20	22	30	30	28	24	20	21	15	13	13	14	18	18	20	22	30	30	28
sp|Q99JY3|GIMA4_MOUSE	Q99JY3	GIMA4_MOUSE	Gimap4	328	21	Mus musculus OX=10090	1:Experimental evidence at protein level	GTPase IMAP family member 4	1	0.999	4	5	5	5	0	0	1	1	0	0	1	1	0	1	0	0	0	0	0	0	1	1	0	0	1	1	0	1	0	0	0	0	0	0	1	1	0	0	1
sp|Q99K01|PDXD1_MOUSE	Q99K01	PDXD1_MOUSE	Pdxdc1	787	9.5	Mus musculus OX=10090	1:Experimental evidence at protein level	Pyridoxal-dependent decarboxylase domain-containing protein 1	1	0.999	5	16	16	16	0	0	0	0	5	6	5	0	0	0	0	0	0	0	0	0	0	0	5	6	5	0	0	0	0	0	0	0	0	0	0	0	5	6	5
sp|Q99K23|UFSP2_MOUSE	Q99K23	UFSP2_MOUSE	Ufsp2	461	6.7	Mus musculus OX=10090	1:Experimental evidence at protein level	Ufm1-specific protease 2	1	0.999	2	8	8	8	0	1	0	1	1	2	2	0	1	0	0	0	0	0	0	1	0	1	1	2	2	0	1	0	0	0	0	0	0	1	0	1	1	2	2
sp|Q99K30|ES8L2_MOUSE	Q99K30	ES8L2_MOUSE	Eps8l2	729	6.9	Mus musculus OX=10090	1:Experimental evidence at protein level	Epidermal growth factor receptor kinase substrate 8-like protein 2	1	0.999	4	9	9	9	0	0	0	0	3	4	2	0	0	0	0	0	0	0	0	0	0	0	3	4	2	0	0	0	0	0	0	0	0	0	0	0	3	4	2
sp|Q99K48|NONO_MOUSE	Q99K48	NONO_MOUSE	Nono	473	30.2	Mus musculus OX=10090	1:Experimental evidence at protein level	Non-POU domain-containing octamer-binding protein	1	0.999	9	26	26	38	2	4	1	2	7	5	4	0	0	0	0	0	0	1	2	4	1	2	7	5	4	0	0	0	0	0	0	1	3	5	2	3	8	6	5
sp|Q99K67|AASS_MOUSE	Q99K67	AASS_MOUSE	Aass	926	55.4	Mus musculus OX=10090	1:Experimental evidence at protein level	Alpha-aminoadipic semialdehyde synthase, mitochondrial	1	0.999	45	387	387	387	33	33	35	24	47	36	39	12	34	34	18	10	18	14	33	33	35	24	47	36	39	12	34	34	18	10	18	14	33	33	35	24	47	36	39
sp|Q99KB8|GLO2_MOUSE	Q99KB8	GLO2_MOUSE	Hagh	309	24.3	Mus musculus OX=10090	1:Experimental evidence at protein level	Hydroxyacylglutathione hydrolase, mitochondrial	1	0.999	6	59	59	59	5	5	5	5	7	6	7	2	3	5	3	0	3	3	5	5	5	5	7	6	7	2	3	5	3	0	3	3	5	5	5	5	7	6	7
sp|Q99KC8|VMA5A_MOUSE	Q99KC8	VMA5A_MOUSE	Vwa5a	793	15.8	Mus musculus OX=10090	1:Experimental evidence at protein level	von Willebrand factor A domain-containing protein 5A	1	0.999	10	31	31	31	2	1	0	0	10	6	8	1	2	1	0	0	0	0	2	1	0	0	10	6	8	1	2	1	0	0	0	0	2	1	0	0	10	6	8
sp|Q99KF1|TMED9_MOUSE	Q99KF1	TMED9_MOUSE	Tmed9	235	29.8	Mus musculus OX=10090	1:Experimental evidence at protein level	Transmembrane emp24 domain-containing protein 9	1	0.999	6	35	35	35	2	3	3	5	4	4	4	2	2	2	1	1	1	1	2	3	3	5	4	4	4	2	2	2	1	1	1	1	2	3	3	5	4	4	4
sp|Q99KG5|LSR_MOUSE	Q99KG5	LSR_MOUSE	Lsr	594	8.4	Mus musculus OX=10090	1:Experimental evidence at protein level	Lipolysis-stimulated lipoprotein receptor	1	0.999	4	29	29	29	2	2	1	2	6	5	5	2	2	2	0	0	0	0	2	2	1	2	6	5	5	2	2	2	0	0	0	0	2	2	1	2	6	5	5
sp|Q99KI0|ACON_MOUSE	Q99KI0	ACON_MOUSE	Aco2	780	49.7	Mus musculus OX=10090	1:Experimental evidence at protein level	Aconitate hydratase, mitochondrial	1	0.999	34	303	303	303	24	27	26	21	34	31	29	18	23	23	10	8	14	15	24	27	26	21	34	31	29	18	23	23	10	8	14	15	24	27	26	21	34	31	29
sp|Q99KJ8|DCTN2_MOUSE	Q99KJ8	DCTN2_MOUSE	Dctn2	402	17.2	Mus musculus OX=10090	1:Experimental evidence at protein level	Dynactin subunit 2	1	0.999	6	17	17	17	0	2	0	1	4	5	4	0	0	1	0	0	0	0	0	2	0	1	4	5	4	0	0	1	0	0	0	0	0	2	0	1	4	5	4
sp|Q99KK7|DPP3_MOUSE	Q99KK7	DPP3_MOUSE	Dpp3	738	18.6	Mus musculus OX=10090	1:Experimental evidence at protein level	Dipeptidyl peptidase 3	1	0.999	11	46	46	46	4	2	2	4	7	7	8	3	4	5	0	0	0	0	4	2	2	4	7	7	8	3	4	5	0	0	0	0	4	2	2	4	7	7	8
sp|Q99KN9|EPN4_MOUSE	Q99KN9	EPN4_MOUSE	Clint1	631	19.2	Mus musculus OX=10090	1:Experimental evidence at protein level	Clathrin interactor 1	1	0.999	10	29	29	29	3	2	2	1	8	6	4	1	1	1	0	0	0	0	3	2	2	1	8	6	4	1	1	1	0	0	0	0	3	2	2	1	8	6	4
sp|Q99KP3|CRYL1_MOUSE	Q99KP3	CRYL1_MOUSE	Cryl1	319	20.4	Mus musculus OX=10090	1:Experimental evidence at protein level	Lambda-crystallin homolog	1	0.999	6	15	15	15	2	4	2	0	4	0	1	0	1	0	0	0	0	1	2	4	2	0	4	0	1	0	1	0	0	0	0	1	2	4	2	0	4	0	1
sp|Q99KP6|PRP19_MOUSE	Q99KP6	PRP19_MOUSE	Prpf19	504	16.3	Mus musculus OX=10090	1:Experimental evidence at protein level	Pre-mRNA-processing factor 19	1	0.999	6	23	23	23	1	2	2	2	4	5	3	1	1	2	0	0	0	0	1	2	2	2	4	5	3	1	1	2	0	0	0	0	1	2	2	2	4	5	3
sp|Q99KQ4|NAMPT_MOUSE	Q99KQ4	NAMPT_MOUSE	Nampt	491	21.2	Mus musculus OX=10090	1:Experimental evidence at protein level	Nicotinamide phosphoribosyltransferase	1	0.999	9	22	22	22	0	0	0	0	4	8	5	0	2	3	0	0	0	0	0	0	0	0	4	8	5	0	2	3	0	0	0	0	0	0	0	0	4	8	5
sp|Q99KR3|LACB2_MOUSE	Q99KR3	LACB2_MOUSE	Lactb2	288	40.6	Mus musculus OX=10090	1:Experimental evidence at protein level	Endoribonuclease LACTB2	1	0.999	11	61	61	61	3	3	2	4	9	8	9	5	6	4	2	2	2	2	3	3	2	4	9	8	9	5	6	4	2	2	2	2	3	3	2	4	9	8	9
sp|Q99KR7|PPIF_MOUSE	Q99KR7	PPIF_MOUSE	Ppif	206	8.3	Mus musculus OX=10090	1:Experimental evidence at protein level	Peptidyl-prolyl cis-trans isomerase F, mitochondrial	1	0.999	3	8	8	8	1	1	0	0	2	2	2	0	0	0	0	0	0	0	1	1	0	0	2	2	2	0	0	0	0	0	0	0	1	1	0	0	2	2	2
sp|Q99KV1|DJB11_MOUSE	Q99KV1	DJB11_MOUSE	Dnajb11	358	35.8	Mus musculus OX=10090	1:Experimental evidence at protein level	DnaJ homolog subfamily B member 11	1	0.999	10	72	72	72	7	7	6	5	8	8	10	7	4	6	0	1	1	2	7	7	6	5	8	8	10	7	4	6	0	1	1	2	7	7	6	5	8	8	10
sp|Q99L04|DHRS1_MOUSE	Q99L04	DHRS1_MOUSE	Dhrs1	313	32.6	Mus musculus OX=10090	1:Experimental evidence at protein level	Dehydrogenase/reductase SDR family member 1	1	0.999	12	71	71	71	4	5	3	6	8	9	9	5	5	5	2	4	3	3	4	5	3	6	8	9	9	5	5	5	2	4	3	3	4	5	3	6	8	9	9
sp|Q99L13|3HIDH_MOUSE	Q99L13	3HIDH_MOUSE	Hibadh	335	40.9	Mus musculus OX=10090	1:Experimental evidence at protein level	3-hydroxyisobutyrate dehydrogenase, mitochondrial	1	0.999	10	87	87	87	7	6	7	6	9	9	11	6	6	8	2	1	4	5	7	6	7	6	9	9	11	6	6	8	2	1	4	5	7	6	7	6	9	9	11
sp|Q99L20|GSTT3_MOUSE	Q99L20	GSTT3_MOUSE	Gstt3	241	46.9	Mus musculus OX=10090	1:Experimental evidence at protein level	Glutathione S-transferase theta-3	1	0.999	15	112	103	112	10	11	9	10	15	15	10	8	5	6	4	3	3	3	10	11	9	9	14	14	9	7	4	5	3	2	3	3	10	11	9	10	15	15	10
sp|Q99L43|CDS2_MOUSE	Q99L43	CDS2_MOUSE	Cds2	444	12.8	Mus musculus OX=10090	1:Experimental evidence at protein level	Phosphatidate cytidylyltransferase 2	1	0.999	5	30	30	30	2	2	2	2	6	5	4	2	1	4	0	0	0	0	2	2	2	2	6	5	4	2	1	4	0	0	0	0	2	2	2	2	6	5	4
sp|Q99L45|IF2B_MOUSE	Q99L45	IF2B_MOUSE	Eif2s2	331	41.7	Mus musculus OX=10090	1:Experimental evidence at protein level	Eukaryotic translation initiation factor 2 subunit 2	1	0.999	16	68	68	68	3	3	1	2	12	10	12	10	5	9	0	0	1	0	3	3	1	2	12	10	12	10	5	9	0	0	1	0	3	3	1	2	12	10	12
sp|Q99L47|F10A1_MOUSE	Q99L47	F10A1_MOUSE	St13	371	21	Mus musculus OX=10090	1:Experimental evidence at protein level	Hsc70-interacting protein	1	0.999	8	50	50	50	4	4	3	5	6	8	6	4	4	5	0	0	0	1	4	4	3	5	6	8	6	4	4	5	0	0	0	1	4	4	3	5	6	8	6
sp|Q99L88|SNTB1_MOUSE	Q99L88	SNTB1_MOUSE	Sntb1	537	27.4	Mus musculus OX=10090	1:Experimental evidence at protein level	Beta-1-syntrophin	1	0.999	8	39	39	39	1	2	1	2	4	10	7	3	5	4	0	0	0	0	1	2	1	2	4	10	7	3	5	4	0	0	0	0	1	2	1	2	4	10	7
sp|Q99LB2|DHRS4_MOUSE	Q99LB2	DHRS4_MOUSE	Dhrs4	279	54.8	Mus musculus OX=10090	1:Experimental evidence at protein level	Dehydrogenase/reductase SDR family member 4	1	0.999	16	115	115	115	7	10	9	12	12	12	11	10	9	7	5	2	4	5	7	10	9	12	12	12	11	10	9	7	5	2	4	5	7	10	9	12	12	12	11
sp|Q99LB6|MAT2B_MOUSE	Q99LB6	MAT2B_MOUSE	Mat2b	334	11.1	Mus musculus OX=10090	1:Experimental evidence at protein level	Methionine adenosyltransferase 2 subunit beta	1	0.999	3	6	6	6	0	0	0	0	2	1	1	1	1	0	0	0	0	0	0	0	0	0	2	1	1	1	1	0	0	0	0	0	0	0	0	0	2	1	1
sp|Q99LB7|SARDH_MOUSE	Q99LB7	SARDH_MOUSE	Sardh	919	61.3	Mus musculus OX=10090	1:Experimental evidence at protein level	Sarcosine dehydrogenase, mitochondrial	1	0.999	49	607	607	607	47	44	45	43	66	64	64	32	38	43	29	28	33	31	47	44	45	43	66	64	64	32	38	43	29	28	33	31	47	44	45	43	66	64	64
sp|Q99LC3|NDUAA_MOUSE	Q99LC3	NDUAA_MOUSE	Ndufa10	355	58.9	Mus musculus OX=10090	1:Experimental evidence at protein level	NADH dehydrogenase [ubiquinone] 1 alpha subcomplex subunit 10, mitochondrial	1	0.999	16	112	112	112	9	9	10	8	16	13	13	4	9	8	4	3	3	3	9	9	10	8	16	13	13	4	9	8	4	3	3	3	9	9	10	8	16	13	13
sp|Q99LC5|ETFA_MOUSE	Q99LC5	ETFA_MOUSE	Etfa	333	71.2	Mus musculus OX=10090	1:Experimental evidence at protein level	Electron transfer flavoprotein subunit alpha, mitochondrial	1	0.999	20	281	281	281	25	24	24	22	33	28	28	13	18	15	15	11	12	13	25	24	24	22	33	28	28	13	18	15	15	11	12	13	25	24	24	22	33	28	28
sp|Q99LD4|CSN1_MOUSE	Q99LD4	CSN1_MOUSE	Gps1	471	11.5	Mus musculus OX=10090	1:Experimental evidence at protein level	COP9 signalosome complex subunit 1	1	0.999	3	11	11	11	1	1	0	0	2	4	2	1	0	0	0	0	0	0	1	1	0	0	2	4	2	1	0	0	0	0	0	0	1	1	0	0	2	4	2
sp|Q99LD9|EI2BB_MOUSE	Q99LD9	EI2BB_MOUSE	Eif2b2	351	5.4	Mus musculus OX=10090	1:Experimental evidence at protein level	Translation initiation factor eIF-2B subunit beta	1	0.999	2	6	6	6	0	0	1	0	2	1	2	0	0	0	0	0	0	0	0	0	1	0	2	1	2	0	0	0	0	0	0	0	0	0	1	0	2	1	2
sp|Q99LF4|RTCB_MOUSE	Q99LF4	RTCB_MOUSE	Rtcb	505	23.4	Mus musculus OX=10090	1:Experimental evidence at protein level	RNA-splicing ligase RtcB homolog	1	0.999	9	43	43	43	2	2	1	2	6	7	8	5	5	5	0	0	0	0	2	2	1	2	6	7	8	5	5	5	0	0	0	0	2	2	1	2	6	7	8
sp|Q99LG2|TNPO2_MOUSE	Q99LG2	TNPO2_MOUSE	Tnpo2	887	5.6	Mus musculus OX=10090	1:Experimental evidence at protein level	Transportin-2	1	0.999	4	3	3	6	0	0	0	0	2	1	0	0	0	0	0	0	0	0	0	0	0	0	2	1	0	0	0	0	0	0	0	0	0	0	0	0	3	1	1
sp|Q99LI2|CLCC1_MOUSE	Q99LI2	CLCC1_MOUSE	Clcc1	539	11.7	Mus musculus OX=10090	1:Experimental evidence at protein level	Chloride channel CLIC-like protein 1	1	0.999	3	5	5	5	0	0	0	0	3	1	1	0	0	0	0	0	0	0	0	0	0	0	3	1	1	0	0	0	0	0	0	0	0	0	0	0	3	1	1
sp|Q99LI7|CSTF3_MOUSE	Q99LI7	CSTF3_MOUSE	Cstf3	717	2.9	Mus musculus OX=10090	1:Experimental evidence at protein level	Cleavage stimulation factor subunit 3	1	0.9989	2	3	3	3	0	0	0	0	1	1	1	0	0	0	0	0	0	0	0	0	0	0	1	1	1	0	0	0	0	0	0	0	0	0	0	0	1	1	1
sp|Q99LM2|CK5P3_MOUSE	Q99LM2	CK5P3_MOUSE	Cdk5rap3	503	15.3	Mus musculus OX=10090	1:Experimental evidence at protein level	CDK5 regulatory subunit-associated protein 3	1	0.999	5	12	12	12	0	0	0	0	5	4	3	0	0	0	0	0	0	0	0	0	0	0	5	4	3	0	0	0	0	0	0	0	0	0	0	0	5	4	3
sp|Q99LX0|PARK7_MOUSE	Q99LX0	PARK7_MOUSE	Park7	189	67.2	Mus musculus OX=10090	1:Experimental evidence at protein level	Parkinson disease protein 7 homolog	1	0.999	12	93	93	93	9	8	5	6	16	14	13	5	5	6	1	1	2	2	9	8	5	6	16	14	13	5	5	6	1	1	2	2	9	8	5	6	16	14	13
sp|Q99M87|DNJA3_MOUSE	Q99M87	DNJA3_MOUSE	Dnaja3	480	26	Mus musculus OX=10090	1:Experimental evidence at protein level	DnaJ homolog subfamily A member 3, mitochondrial	1	0.999	9	34	34	34	3	3	2	3	4	6	7	2	2	2	0	0	0	0	3	3	2	3	4	6	7	2	2	2	0	0	0	0	3	3	2	3	4	6	7
sp|Q99MN1|SYK_MOUSE	Q99MN1	SYK_MOUSE	Kars1	595	30.1	Mus musculus OX=10090	1:Experimental evidence at protein level	Lysine--tRNA ligase	1	0.999	14	44	44	44	3	5	1	3	7	7	9	2	3	4	0	0	0	0	3	5	1	3	7	7	9	2	3	4	0	0	0	0	3	5	1	3	7	7	9
sp|Q99MN9|PCCB_MOUSE	Q99MN9	PCCB_MOUSE	Pccb	541	59.9	Mus musculus OX=10090	1:Experimental evidence at protein level	Propionyl-CoA carboxylase beta chain, mitochondrial	1	0.999	24	155	155	155	11	10	12	10	20	17	18	7	13	13	7	3	7	7	11	10	12	10	20	17	18	7	13	13	7	3	7	7	11	10	12	10	20	17	18
sp|Q99MR6|SRRT_MOUSE	Q99MR6	SRRT_MOUSE	Srrt	875	9	Mus musculus OX=10090	1:Experimental evidence at protein level	Serrate RNA effector molecule homolog	1	0.999	6	25	25	25	2	3	1	1	5	5	4	0	1	3	0	0	0	0	2	3	1	1	5	5	4	0	1	3	0	0	0	0	2	3	1	1	5	5	4
sp|Q99MR8|MCCA_MOUSE	Q99MR8	MCCA_MOUSE	Mccc1	717	53.3	Mus musculus OX=10090	1:Experimental evidence at protein level	Methylcrotonoyl-CoA carboxylase subunit alpha, mitochondrial	1	0.999	34	184	184	184	18	14	10	9	30	23	25	5	17	11	3	4	6	9	18	14	10	9	30	23	25	5	17	11	3	4	6	9	18	14	10	9	30	23	25
sp|Q99MZ7|PECR_MOUSE	Q99MZ7	PECR_MOUSE	Pecr	303	45.2	Mus musculus OX=10090	1:Experimental evidence at protein level	Peroxisomal trans-2-enoyl-CoA reductase	1	0.999	11	88	88	88	5	5	6	6	11	11	10	4	7	6	4	4	4	5	5	5	6	6	11	11	10	4	7	6	4	4	4	5	5	5	6	6	11	11	10
sp|Q99NB9|SF3B1_MOUSE	Q99NB9	SF3B1_MOUSE	Sf3b1	1304	16.2	Mus musculus OX=10090	1:Experimental evidence at protein level	Splicing factor 3B subunit 1	1	0.999	14	44	44	44	2	3	0	2	10	10	12	0	4	1	0	0	0	0	2	3	0	2	10	10	12	0	4	1	0	0	0	0	2	3	0	2	10	10	12
sp|Q99P30|NUDT7_MOUSE	Q99P30	NUDT7_MOUSE	Nudt7	236	29.7	Mus musculus OX=10090	1:Experimental evidence at protein level	Peroxisomal coenzyme A diphosphatase NUDT7	1	0.999	7	51	51	51	4	4	4	4	6	5	7	3	3	4	1	2	2	2	4	4	4	4	6	5	7	3	3	4	1	2	2	2	4	4	4	4	6	5	7
sp|Q99P72|RTN4_MOUSE	Q99P72	RTN4_MOUSE	Rtn4	1162	3.5	Mus musculus OX=10090	1:Experimental evidence at protein level	Reticulon-4	1	0.999	3	7	7	7	0	1	1	1	2	1	1	0	0	0	0	0	0	0	0	1	1	1	2	1	1	0	0	0	0	0	0	0	0	1	1	1	2	1	1
sp|Q99PG0|AAAD_MOUSE	Q99PG0	AAAD_MOUSE	Aadac	398	38.7	Mus musculus OX=10090	1:Experimental evidence at protein level	Arylacetamide deacetylase	1	0.999	12	95	95	95	6	6	7	8	10	10	10	8	5	6	5	5	5	4	6	6	7	8	10	10	10	8	5	6	5	5	5	4	6	6	7	8	10	10	10
sp|Q99PG2|OGFR_MOUSE	Q99PG2	OGFR_MOUSE	Ogfr	633	18.2	Mus musculus OX=10090	1:Experimental evidence at protein level	Opioid growth factor receptor	1	0.999	4	17	17	17	2	1	2	1	2	2	3	2	0	1	1	0	0	0	2	1	2	1	2	2	3	2	0	1	1	0	0	0	2	1	2	1	2	2	3
sp|Q99PL5|RRBP1_MOUSE	Q99PL5	RRBP1_MOUSE	Rrbp1	1605	38.1	Mus musculus OX=10090	1:Experimental evidence at protein level	Ribosome-binding protein 1	1	0.999	57	550	550	550	42	45	49	45	54	52	55	37	45	48	22	15	18	23	42	45	49	45	54	52	55	37	45	48	22	15	18	23	42	45	49	45	54	52	55
sp|Q99PV0|PRP8_MOUSE	Q99PV0	PRP8_MOUSE	Prpf8	2335	7.1	Mus musculus OX=10090	1:Experimental evidence at protein level	Pre-mRNA-processing-splicing factor 8	1	0.999	10	20	20	20	0	1	0	0	3	7	7	0	1	1	0	0	0	0	0	1	0	0	3	7	7	0	1	1	0	0	0	0	0	1	0	0	3	7	7
sp|Q9CPP6|NDUA5_MOUSE	Q9CPP6	NDUA5_MOUSE	Ndufa5	116	14.7	Mus musculus OX=10090	1:Experimental evidence at protein level	NADH dehydrogenase [ubiquinone] 1 alpha subcomplex subunit 5	1	0.999	3	31	31	31	3	3	3	2	3	3	3	2	1	2	2	0	2	2	3	3	3	2	3	3	3	2	1	2	2	0	2	2	3	3	3	2	3	3	3
sp|Q9CPQ1|COX6C_MOUSE	Q9CPQ1	COX6C_MOUSE	Cox6c	76	63.2	Mus musculus OX=10090	1:Experimental evidence at protein level	Cytochrome c oxidase subunit 6C	1	0.999	11	103	103	103	9	10	10	8	12	8	12	8	8	7	4	3	2	2	9	10	10	8	12	8	12	8	8	7	4	3	2	2	9	10	10	8	12	8	12
sp|Q9CPQ3|TOM22_MOUSE	Q9CPQ3	TOM22_MOUSE	Tomm22	142	26.1	Mus musculus OX=10090	1:Experimental evidence at protein level	Mitochondrial import receptor subunit TOM22 homolog	1	0.999	2	6	6	6	0	0	0	0	3	0	3	0	0	0	0	0	0	0	0	0	0	0	3	0	3	0	0	0	0	0	0	0	0	0	0	0	3	0	3
sp|Q9CPQ8|ATP5L_MOUSE	Q9CPQ8	ATP5L_MOUSE	Atp5mg	103	72.8	Mus musculus OX=10090	1:Experimental evidence at protein level	ATP synthase subunit g, mitochondrial	1	0.999	6	69	69	69	5	4	4	2	10	13	10	5	5	5	2	1	2	1	5	4	4	2	10	13	10	5	5	5	2	1	2	1	5	4	4	2	10	13	10
sp|Q9CPR4|RL17_MOUSE	Q9CPR4	RL17_MOUSE	Rpl17	184	35.9	Mus musculus OX=10090	1:Experimental evidence at protein level	60S ribosomal protein L17	1	0.999	7	69	69	69	4	5	6	4	5	9	7	4	4	5	5	3	5	3	4	5	6	4	5	9	7	4	4	5	5	3	5	3	4	5	6	4	5	9	7
sp|Q9CPU0|LGUL_MOUSE	Q9CPU0	LGUL_MOUSE	Glo1	184	40.8	Mus musculus OX=10090	1:Experimental evidence at protein level	Lactoylglutathione lyase	1	0.999	7	42	42	42	3	2	1	2	7	6	7	3	5	5	0	0	1	0	3	2	1	2	7	6	7	3	5	5	0	0	1	0	3	2	1	2	7	6	7
sp|Q9CPU2|NDUB2_MOUSE	Q9CPU2	NDUB2_MOUSE	Ndufb2	105	8.6	Mus musculus OX=10090	1:Experimental evidence at protein level	NADH dehydrogenase [ubiquinone] 1 beta subcomplex subunit 2, mitochondrial	1	0.999	2	10	10	10	1	1	1	1	0	1	1	0	0	0	1	1	1	1	1	1	1	1	0	1	1	0	0	0	1	1	1	1	1	1	1	1	0	1	1
sp|Q9CPV4|GLOD4_MOUSE	Q9CPV4	GLOD4_MOUSE	Glod4	298	31.2	Mus musculus OX=10090	1:Experimental evidence at protein level	Glyoxalase domain-containing protein 4	1	0.999	9	52	52	52	3	3	4	6	7	7	6	5	5	6	0	0	0	0	3	3	4	6	7	7	6	5	5	6	0	0	0	0	3	3	4	6	7	7	6
sp|Q9CPW4|ARPC5_MOUSE	Q9CPW4	ARPC5_MOUSE	Arpc5	151	40.4	Mus musculus OX=10090	1:Experimental evidence at protein level	Actin-related protein 2/3 complex subunit 5	1	0.999	5	24	24	24	1	2	1	2	4	4	3	1	2	2	0	0	1	1	1	2	1	2	4	4	3	1	2	2	0	0	1	1	1	2	1	2	4	4	3
sp|Q9CPY7|AMPL_MOUSE	Q9CPY7	AMPL_MOUSE	Lap3	519	49.7	Mus musculus OX=10090	1:Experimental evidence at protein level	Cytosol aminopeptidase	1	0.999	25	166	166	166	11	10	10	10	20	22	19	14	13	13	5	6	7	6	11	10	10	10	20	22	19	14	13	13	5	6	7	6	11	10	10	10	20	22	19
sp|Q9CQ06|RM24_MOUSE	Q9CQ06	RM24_MOUSE	Mrpl24	216	13.4	Mus musculus OX=10090	1:Experimental evidence at protein level	39S ribosomal protein L24, mitochondrial	1	0.999	3	5	5	5	0	0	0	0	1	2	1	0	0	1	0	0	0	0	0	0	0	0	1	2	1	0	0	1	0	0	0	0	0	0	0	0	1	2	1
sp|Q9CQ22|LTOR1_MOUSE	Q9CQ22	LTOR1_MOUSE	Lamtor1	161	14.9	Mus musculus OX=10090	1:Experimental evidence at protein level	Ragulator complex protein LAMTOR1	1	0.999	2	3	3	3	0	0	0	0	1	1	1	0	0	0	0	0	0	0	0	0	0	0	1	1	1	0	0	0	0	0	0	0	0	0	0	0	1	1	1
sp|Q9CQ48|NUDC2_MOUSE	Q9CQ48	NUDC2_MOUSE	Nudcd2	157	12.1	Mus musculus OX=10090	1:Experimental evidence at protein level	NudC domain-containing protein 2	1	0.999	2	7	7	7	2	1	0	0	1	1	1	0	0	0	0	0	0	1	2	1	0	0	1	1	1	0	0	0	0	0	0	1	2	1	0	0	1	1	1
sp|Q9CQ54|NDUC2_MOUSE	Q9CQ54	NDUC2_MOUSE	Ndufc2	120	31.7	Mus musculus OX=10090	1:Experimental evidence at protein level	NADH dehydrogenase [ubiquinone] 1 subunit C2	1	0.999	4	32	32	32	2	2	3	3	4	4	5	2	2	2	1	0	1	1	2	2	3	3	4	4	5	2	2	2	1	0	1	1	2	2	3	3	4	4	5
sp|Q9CQ60|6PGL_MOUSE	Q9CQ60	6PGL_MOUSE	Pgls	257	47.5	Mus musculus OX=10090	1:Experimental evidence at protein level	6-phosphogluconolactonase	1	0.999	7	48	48	48	3	4	4	3	7	6	6	3	5	4	0	0	2	1	3	4	4	3	7	6	6	3	5	4	0	0	2	1	3	4	4	3	7	6	6
sp|Q9CQ62|DECR_MOUSE	Q9CQ62	DECR_MOUSE	Decr1	335	46.3	Mus musculus OX=10090	1:Experimental evidence at protein level	2,4-dienoyl-CoA reductase [(3E)-enoyl-CoA-producing], mitochondrial	1	0.999	13	122	122	122	7	7	9	10	13	13	12	10	9	10	7	5	5	5	7	7	9	10	13	13	12	10	9	10	7	5	5	5	7	7	9	10	13	13	12
sp|Q9CQ69|QCR8_MOUSE	Q9CQ69	QCR8_MOUSE	Uqcrq	82	92.7	Mus musculus OX=10090	1:Experimental evidence at protein level	Cytochrome b-c1 complex subunit 8	1	0.999	12	117	117	117	11	12	11	9	15	14	13	5	7	7	3	3	3	4	11	12	11	9	15	14	13	5	7	7	3	3	3	4	11	12	11	9	15	14	13
sp|Q9CQ75|NDUA2_MOUSE	Q9CQ75	NDUA2_MOUSE	Ndufa2	99	49.5	Mus musculus OX=10090	1:Experimental evidence at protein level	NADH dehydrogenase [ubiquinone] 1 alpha subcomplex subunit 2	1	0.999	6	36	36	36	3	2	3	3	7	5	4	2	3	3	0	0	0	1	3	2	3	3	7	5	4	2	3	3	0	0	0	1	3	2	3	3	7	5	4
sp|Q9CQ91|NDUA3_MOUSE	Q9CQ91	NDUA3_MOUSE	Ndufa3	84	21.4	Mus musculus OX=10090	1:Experimental evidence at protein level	NADH dehydrogenase [ubiquinone] 1 alpha subcomplex subunit 3	1	0.999	2	15	15	15	1	2	1	1	2	1	1	2	2	2	0	0	0	0	1	2	1	1	2	1	1	2	2	2	0	0	0	0	1	2	1	1	2	1	1
sp|Q9CQ92|FIS1_MOUSE	Q9CQ92	FIS1_MOUSE	Fis1	152	38.8	Mus musculus OX=10090	1:Experimental evidence at protein level	Mitochondrial fission 1 protein	1	0.999	6	31	31	31	2	3	3	3	4	4	5	2	2	3	0	0	0	0	2	3	3	3	4	4	5	2	2	3	0	0	0	0	2	3	3	3	4	4	5
sp|Q9CQA3|SDHB_MOUSE	Q9CQA3	SDHB_MOUSE	Sdhb	282	48.6	Mus musculus OX=10090	1:Experimental evidence at protein level	Succinate dehydrogenase [ubiquinone] iron-sulfur subunit, mitochondrial	1	0.999	18	154	154	154	12	13	10	9	17	14	14	11	14	14	9	5	5	7	12	13	10	9	17	14	14	11	14	14	9	5	5	7	12	13	10	9	17	14	14
sp|Q9CQB2|MCRI2_MOUSE	Q9CQB2	MCRI2_MOUSE	Mcrip2	160	22.5	Mus musculus OX=10090	1:Experimental evidence at protein level	MAPK regulated corepressor interacting protein 2	1	0.999	2	5	5	5	0	1	0	0	1	1	2	0	0	0	0	0	0	0	0	1	0	0	1	1	2	0	0	0	0	0	0	0	0	1	0	0	1	1	2
sp|Q9CQC6|BZW1_MOUSE	Q9CQC6	BZW1_MOUSE	Bzw1	419	15.5	Mus musculus OX=10090	1:Experimental evidence at protein level	Basic leucine zipper and W2 domain-containing protein 1	1	0.999	8	32	32	32	4	3	4	4	3	6	3	2	1	2	0	0	0	0	4	3	4	4	3	6	3	2	1	2	0	0	0	0	4	3	4	4	3	6	3
sp|Q9CQC7|NDUB4_MOUSE	Q9CQC7	NDUB4_MOUSE	Ndufb4	129	67.4	Mus musculus OX=10090	1:Experimental evidence at protein level	NADH dehydrogenase [ubiquinone] 1 beta subcomplex subunit 4	1	0.999	8	34	34	34	4	4	4	1	7	4	4	2	1	0	1	0	1	1	4	4	4	1	7	4	4	2	1	0	1	0	1	1	4	4	4	1	7	4	4
sp|Q9CQC9|SAR1B_MOUSE	Q9CQC9	SAR1B_MOUSE	Sar1b	198	61.6	Mus musculus OX=10090	1:Experimental evidence at protein level	GTP-binding protein SAR1b	1	0.999	10	60	41	60	3	3	2	4	7	8	11	7	5	4	1	2	1	2	1	2	1	2	5	6	9	5	4	3	1	1	0	1	3	3	2	4	7	8	11
sp|Q9CQD1|RAB5A_MOUSE	Q9CQD1	RAB5A_MOUSE	Rab5a	215	32.6	Mus musculus OX=10090	1:Experimental evidence at protein level	Ras-related protein Rab-5A	1	0.999	6	14	14	37	1	1	1	1	2	3	2	1	1	1	0	0	0	0	1	1	1	1	2	3	2	1	1	1	0	0	0	0	3	2	2	4	5	6	5
sp|Q9CQE1|NPS3B_MOUSE	Q9CQE1	NPS3B_MOUSE	Nipsnap3b	247	51	Mus musculus OX=10090	1:Experimental evidence at protein level	Protein NipSnap homolog 3B	1	0.999	10	47	47	47	4	5	5	5	6	8	6	3	2	3	0	0	0	0	4	5	5	5	6	8	6	3	2	3	0	0	0	0	4	5	5	5	6	8	6
sp|Q9CQE8|RTRAF_MOUSE	Q9CQE8	RTRAF_MOUSE	RTRAF	244	13.9	Mus musculus OX=10090	1:Experimental evidence at protein level	RNA transcription, translation and transport factor protein	1	0.999	3	11	11	11	0	0	0	0	3	3	3	0	1	1	0	0	0	0	0	0	0	0	3	3	3	0	1	1	0	0	0	0	0	0	0	0	3	3	3
sp|Q9CQF9|PCYOX_MOUSE	Q9CQF9	PCYOX_MOUSE	Pcyox1	505	12.5	Mus musculus OX=10090	1:Experimental evidence at protein level	Prenylcysteine oxidase	1	0.999	4	17	17	17	0	2	2	2	3	3	1	2	1	1	0	0	0	0	0	2	2	2	3	3	1	2	1	1	0	0	0	0	0	2	2	2	3	3	1
sp|Q9CQH3|NDUB5_MOUSE	Q9CQH3	NDUB5_MOUSE	Ndufb5	189	33.9	Mus musculus OX=10090	1:Experimental evidence at protein level	NADH dehydrogenase [ubiquinone] 1 beta subcomplex subunit 5, mitochondrial	1	0.999	7	47	47	47	5	5	5	5	5	5	4	3	2	3	2	0	2	1	5	5	5	5	5	5	4	3	2	3	2	0	2	1	5	5	5	5	5	5	4
sp|Q9CQI6|COTL1_MOUSE	Q9CQI6	COTL1_MOUSE	Cotl1	142	40.8	Mus musculus OX=10090	1:Experimental evidence at protein level	Coactosin-like protein	1	0.999	9	48	48	48	3	3	1	5	7	4	4	5	5	5	1	0	2	3	3	3	1	5	7	4	4	5	5	5	1	0	2	3	3	3	1	5	7	4	4
sp|Q9CQI7|RU2B_MOUSE	Q9CQI7	RU2B_MOUSE	Snrpb2	225	9.3	Mus musculus OX=10090	1:Experimental evidence at protein level	U2 small nuclear ribonucleoprotein B''	1	0.999	2	9	9	9	0	0	0	0	3	3	3	0	0	0	0	0	0	0	0	0	0	0	3	3	3	0	0	0	0	0	0	0	0	0	0	0	3	3	3
sp|Q9CQJ6|DENR_MOUSE	Q9CQJ6	DENR_MOUSE	Denr	198	17.7	Mus musculus OX=10090	1:Experimental evidence at protein level	Density-regulated protein	1	0.999	4	10	10	10	0	1	0	0	4	3	2	0	0	0	0	0	0	0	0	1	0	0	4	3	2	0	0	0	0	0	0	0	0	1	0	0	4	3	2
sp|Q9CQJ8|NDUB9_MOUSE	Q9CQJ8	NDUB9_MOUSE	Ndufb9	179	19.6	Mus musculus OX=10090	1:Experimental evidence at protein level	NADH dehydrogenase [ubiquinone] 1 beta subcomplex subunit 9	1	0.999	3	8	8	8	0	0	0	0	2	1	1	0	2	2	0	0	0	0	0	0	0	0	2	1	1	0	2	2	0	0	0	0	0	0	0	0	2	1	1
sp|Q9CQM5|TXD17_MOUSE	Q9CQM5	TXD17_MOUSE	Txndc17	123	15.4	Mus musculus OX=10090	1:Experimental evidence at protein level	Thioredoxin domain-containing protein 17	1	0.999	2	7	7	7	0	1	0	1	1	2	1	0	1	0	0	0	0	0	0	1	0	1	1	2	1	0	1	0	0	0	0	0	0	1	0	1	1	2	1
sp|Q9CQM9|GLRX3_MOUSE	Q9CQM9	GLRX3_MOUSE	Glrx3	337	25.5	Mus musculus OX=10090	1:Experimental evidence at protein level	Glutaredoxin-3	1	0.999	5	23	23	23	1	2	0	2	3	3	3	4	2	3	0	0	0	0	1	2	0	2	3	3	3	4	2	3	0	0	0	0	1	2	0	2	3	3	3
sp|Q9CQN1|TRAP1_MOUSE	Q9CQN1	TRAP1_MOUSE	Trap1	706	49.2	Mus musculus OX=10090	1:Experimental evidence at protein level	Heat shock protein 75 kDa, mitochondrial	1	0.999	29	186	186	186	16	17	14	12	20	23	24	12	17	13	5	1	6	6	16	17	14	12	20	23	24	12	17	13	5	1	6	6	16	17	14	12	20	23	24
sp|Q9CQQ7|AT5F1_MOUSE	Q9CQQ7	AT5F1_MOUSE	Atp5pb	256	49.6	Mus musculus OX=10090	1:Experimental evidence at protein level	ATP synthase F(0) complex subunit B1, mitochondrial	1	0.999	18	157	157	157	11	14	14	10	19	14	18	6	11	13	7	6	7	7	11	14	14	10	19	14	18	6	11	13	7	6	7	7	11	14	14	10	19	14	18
sp|Q9CQR2|RS21_MOUSE	Q9CQR2	RS21_MOUSE	Rps21	83	53	Mus musculus OX=10090	1:Experimental evidence at protein level	40S ribosomal protein S21	1	0.999	4	29	29	29	2	2	1	1	5	6	5	2	2	2	0	0	1	0	2	2	1	1	5	6	5	2	2	2	0	0	1	0	2	2	1	1	5	6	5
sp|Q9CQR4|ACO13_MOUSE	Q9CQR4	ACO13_MOUSE	Acot13	140	47.9	Mus musculus OX=10090	1:Experimental evidence at protein level	Acyl-coenzyme A thioesterase 13	1	0.999	6	59	59	59	5	4	4	4	8	6	5	4	4	3	3	3	3	3	5	4	4	4	8	6	5	4	4	3	3	3	3	3	5	4	4	4	8	6	5
sp|Q9CQS8|SC61B_MOUSE	Q9CQS8	SC61B_MOUSE	Sec61b	96	37.5	Mus musculus OX=10090	1:Experimental evidence at protein level	Protein transport protein Sec61 subunit beta	1	0.999	3	43	43	43	4	4	3	5	4	5	3	2	2	3	2	2	2	2	4	4	3	5	4	5	3	2	2	3	2	2	2	2	4	4	3	5	4	5	3
sp|Q9CQT1|MTNA_MOUSE	Q9CQT1	MTNA_MOUSE	Mri1	369	23.6	Mus musculus OX=10090	1:Experimental evidence at protein level	Methylthioribose-1-phosphate isomerase	1	0.999	9	47	47	47	5	3	2	4	6	6	5	5	5	5	1	0	0	0	5	3	2	4	6	6	5	5	5	5	1	0	0	0	5	3	2	4	6	6	5
sp|Q9CQU3|RER1_MOUSE	Q9CQU3	RER1_MOUSE	Rer1	196	20.4	Mus musculus OX=10090	1:Experimental evidence at protein level	Protein RER1	1	0.999	4	14	14	14	0	2	1	2	3	3	3	0	0	0	0	0	0	0	0	2	1	2	3	3	3	0	0	0	0	0	0	0	0	2	1	2	3	3	3
sp|Q9CQV4|RETR3_MOUSE	Q9CQV4	RETR3_MOUSE	Retreg3	466	10.7	Mus musculus OX=10090	1:Experimental evidence at protein level	Reticulophagy regulator 3	1	0.999	3	9	9	9	0	0	0	1	2	2	2	0	0	1	1	0	0	0	0	0	0	1	2	2	2	0	0	1	1	0	0	0	0	0	0	1	2	2	2
sp|Q9CQV8|1433B_MOUSE	Q9CQV8	1433B_MOUSE	Ywhab	246	48.4	Mus musculus OX=10090	1:Experimental evidence at protein level	14-3-3 protein beta/alpha	1	0.999	12	49	49	115	2	2	2	4	5	5	5	5	7	5	1	2	2	2	2	2	2	4	5	5	5	5	7	5	1	2	2	2	6	6	6	9	15	14	13
sp|Q9CQW1|YKT6_MOUSE	Q9CQW1	YKT6_MOUSE	Ykt6	198	8.6	Mus musculus OX=10090	1:Experimental evidence at protein level	Synaptobrevin homolog YKT6	1	0.999	2	11	11	11	1	1	1	1	1	1	1	1	1	2	0	0	0	0	1	1	1	1	1	1	1	1	1	2	0	0	0	0	1	1	1	1	1	1	1
sp|Q9CQW2|ARL8B_MOUSE	Q9CQW2	ARL8B_MOUSE	Arl8b	186	10.2	Mus musculus OX=10090	1:Experimental evidence at protein level	ADP-ribosylation factor-like protein 8B	1	0.999	3	17	13	17	1	1	1	1	2	3	2	0	2	1	0	1	1	1	1	1	1	1	2	2	1	0	1	0	0	1	1	1	1	1	1	1	2	3	2
sp|Q9CQX2|CYB5B_MOUSE	Q9CQX2	CYB5B_MOUSE	Cyb5b	146	67.1	Mus musculus OX=10090	1:Experimental evidence at protein level	Cytochrome b5 type B	1	0.999	9	98	98	98	7	8	7	10	7	9	7	9	7	6	5	6	5	5	7	8	7	10	7	9	7	9	7	6	5	6	5	5	7	8	7	10	7	9	7
sp|Q9CQY5|MAGT1_MOUSE	Q9CQY5	MAGT1_MOUSE	Magt1	335	8.1	Mus musculus OX=10090	1:Experimental evidence at protein level	Magnesium transporter protein 1	1	0.999	3	16	16	16	3	2	2	1	3	1	2	2	0	0	0	0	0	0	3	2	2	1	3	1	2	2	0	0	0	0	0	0	3	2	2	1	3	1	2
sp|Q9CQZ5|NDUA6_MOUSE	Q9CQZ5	NDUA6_MOUSE	Ndufa6	131	63.4	Mus musculus OX=10090	1:Experimental evidence at protein level	NADH dehydrogenase [ubiquinone] 1 alpha subcomplex subunit 6	1	0.999	8	49	49	49	6	3	3	3	8	6	5	3	3	2	1	1	2	3	6	3	3	3	8	6	5	3	3	2	1	1	2	3	6	3	3	3	8	6	5
sp|Q9CR00|PSMD9_MOUSE	Q9CR00	PSMD9_MOUSE	Psmd9	222	28.4	Mus musculus OX=10090	1:Experimental evidence at protein level	26S proteasome non-ATPase regulatory subunit 9	1	0.999	6	19	19	19	1	0	2	1	5	3	4	1	1	1	0	0	0	0	1	0	2	1	5	3	4	1	1	1	0	0	0	0	1	0	2	1	5	3	4
sp|Q9CR16|PPID_MOUSE	Q9CR16	PPID_MOUSE	Ppid	370	21.4	Mus musculus OX=10090	1:Experimental evidence at protein level	Peptidyl-prolyl cis-trans isomerase D	1	0.999	8	32	32	32	2	4	2	3	5	5	5	1	2	2	0	0	1	0	2	4	2	3	5	5	5	1	2	2	0	0	1	0	2	4	2	3	5	5	5
sp|Q9CR41|HYPK_MOUSE	Q9CR41	HYPK_MOUSE	Hypk	129	14	Mus musculus OX=10090	1:Experimental evidence at protein level	Huntingtin-interacting protein K	1	0.999	2	16	16	16	1	2	1	1	2	2	1	2	2	2	0	0	0	0	1	2	1	1	2	2	1	2	2	2	0	0	0	0	1	2	1	1	2	2	1
sp|Q9CR51|VATG1_MOUSE	Q9CR51	VATG1_MOUSE	Atp6v1g1	118	22	Mus musculus OX=10090	1:Experimental evidence at protein level	V-type proton ATPase subunit G 1	1	0.999	2	8	8	8	1	1	0	0	1	1	1	2	0	1	0	0	0	0	1	1	0	0	1	1	1	2	0	1	0	0	0	0	1	1	0	0	1	1	1
sp|Q9CR57|RL14_MOUSE	Q9CR57	RL14_MOUSE	Rpl14	217	32.3	Mus musculus OX=10090	1:Experimental evidence at protein level	60S ribosomal protein L14	1	0.999	6	55	55	55	6	5	6	4	5	5	4	4	4	4	2	2	2	2	6	5	6	4	5	5	4	4	4	4	2	2	2	2	6	5	6	4	5	5	4
sp|Q9CR61|NDUB7_MOUSE	Q9CR61	NDUB7_MOUSE	Ndufb7	137	27.7	Mus musculus OX=10090	1:Experimental evidence at protein level	NADH dehydrogenase [ubiquinone] 1 beta subcomplex subunit 7	1	0.999	3	18	18	18	1	1	1	2	3	3	3	1	1	1	1	0	0	0	1	1	1	2	3	3	3	1	1	1	1	0	0	0	1	1	1	2	3	3	3
sp|Q9CR62|M2OM_MOUSE	Q9CR62	M2OM_MOUSE	Slc25a11	314	47.1	Mus musculus OX=10090	1:Experimental evidence at protein level	Mitochondrial 2-oxoglutarate/malate carrier protein	1	0.999	13	102	102	102	7	9	7	8	14	10	12	5	7	9	5	1	5	3	7	9	7	8	14	10	12	5	7	9	5	1	5	3	7	9	7	8	14	10	12
sp|Q9CR68|UCRI_MOUSE	Q9CR68	UCRI_MOUSE	Uqcrfs1	274	52.9	Mus musculus OX=10090	1:Experimental evidence at protein level	Cytochrome b-c1 complex subunit Rieske, mitochondrial	1	0.999	17	159	159	159	14	15	12	12	15	15	15	10	16	12	7	5	5	6	14	15	12	12	15	15	15	10	16	12	7	5	5	6	14	15	12	12	15	15	15
sp|Q9CR98|F136A_MOUSE	Q9CR98	F136A_MOUSE	Fam136a	138	18.1	Mus musculus OX=10090	1:Experimental evidence at protein level	Protein FAM136A	1	0.999	2	8	8	8	0	0	0	0	2	1	2	1	1	1	0	0	0	0	0	0	0	0	2	1	2	1	1	1	0	0	0	0	0	0	0	0	2	1	2
sp|Q9CRB3|HIUH_MOUSE	Q9CRB3	HIUH_MOUSE	Urah	118	50.8	Mus musculus OX=10090	1:Experimental evidence at protein level	5-hydroxyisourate hydrolase	1	0.999	5	38	38	38	3	3	3	3	5	5	4	1	2	1	2	2	2	2	3	3	3	3	5	5	4	1	2	1	2	2	2	2	3	3	3	3	5	5	4
sp|Q9CRB8|MTFP1_MOUSE	Q9CRB8	MTFP1_MOUSE	Mtfp1	166	28.3	Mus musculus OX=10090	1:Experimental evidence at protein level	Mitochondrial fission process protein 1	1	0.999	4	8	8	8	0	0	0	0	3	2	2	0	1	0	0	0	0	0	0	0	0	0	3	2	2	0	1	0	0	0	0	0	0	0	0	0	3	2	2
sp|Q9CRB9|MIC19_MOUSE	Q9CRB9	MIC19_MOUSE	Chchd3	227	38.8	Mus musculus OX=10090	1:Experimental evidence at protein level	MIC	1	0.999	13	88	88	88	7	8	6	7	10	9	11	6	5	9	2	2	2	4	7	8	6	7	10	9	11	6	5	9	2	2	2	4	7	8	6	7	10	9	11
sp|Q9CRD0|OCAD1_MOUSE	Q9CRD0	OCAD1_MOUSE	Ociad1	247	32	Mus musculus OX=10090	1:Experimental evidence at protein level	OCIA domain-containing protein 1	1	0.999	7	33	33	33	2	2	2	3	4	7	4	2	4	2	0	0	1	0	2	2	2	3	4	7	4	2	4	2	0	0	1	0	2	2	2	3	4	7	4
sp|Q9CRD2|EMC2_MOUSE	Q9CRD2	EMC2_MOUSE	Emc2	297	11.1	Mus musculus OX=10090	1:Experimental evidence at protein level	ER membrane protein complex subunit 2	1	0.999	2	11	11	11	1	1	2	1	1	1	1	1	1	1	0	0	0	0	1	1	2	1	1	1	1	1	1	1	0	0	0	0	1	1	2	1	1	1	1
sp|Q9CS42|PRPS2_MOUSE	Q9CS42	PRPS2_MOUSE	Prps2	318	18.2	Mus musculus OX=10090	1:Experimental evidence at protein level	Ribose-phosphate pyrophosphokinase 2	1	0.999	5	5	5	11	0	0	0	0	2	2	1	0	0	0	0	0	0	0	0	0	0	0	2	2	1	0	0	0	0	0	0	0	0	0	1	0	4	3	1
sp|Q9CSN1|SNW1_MOUSE	Q9CSN1	SNW1_MOUSE	Snw1	536	4.7	Mus musculus OX=10090	1:Experimental evidence at protein level	SNW domain-containing protein 1	1	0.999	2	5	5	5	0	0	0	0	2	2	1	0	0	0	0	0	0	0	0	0	0	0	2	2	1	0	0	0	0	0	0	0	0	0	0	0	2	2	1
sp|Q9CSU0|RPR1B_MOUSE	Q9CSU0	RPR1B_MOUSE	Rprd1b	326	8.6	Mus musculus OX=10090	1:Experimental evidence at protein level	Regulation of nuclear pre-mRNA domain-containing protein 1B	1	0.999	2	6	6	6	0	0	0	0	2	2	2	0	0	0	0	0	0	0	0	0	0	0	2	2	2	0	0	0	0	0	0	0	0	0	0	0	2	2	2
sp|Q9CT10|RANB3_MOUSE	Q9CT10	RANB3_MOUSE	Ranbp3	491	11.4	Mus musculus OX=10090	1:Experimental evidence at protein level	Ran-binding protein 3	1	0.999	4	8	8	8	0	0	0	1	3	1	3	0	0	0	0	0	0	0	0	0	0	1	3	1	3	0	0	0	0	0	0	0	0	0	0	1	3	1	3
sp|Q9CU62|SMC1A_MOUSE	Q9CU62	SMC1A_MOUSE	Smc1a	1233	5	Mus musculus OX=10090	1:Experimental evidence at protein level	Structural maintenance of chromosomes protein 1A	1	0.999	3	3	3	3	1	0	0	0	0	0	2	0	0	0	0	0	0	0	1	0	0	0	0	0	2	0	0	0	0	0	0	0	1	0	0	0	0	0	2
sp|Q9CVB6|ARPC2_MOUSE	Q9CVB6	ARPC2_MOUSE	Arpc2	300	58.7	Mus musculus OX=10090	1:Experimental evidence at protein level	Actin-related protein 2/3 complex subunit 2	1	0.999	15	58	58	58	4	5	4	3	12	10	9	1	3	4	0	0	1	2	4	5	4	3	12	10	9	1	3	4	0	0	1	2	4	5	4	3	12	10	9
sp|Q9CW03|SMC3_MOUSE	Q9CW03	SMC3_MOUSE	Smc3	1217	10.6	Mus musculus OX=10090	1:Experimental evidence at protein level	Structural maintenance of chromosomes protein 3	1	0.999	10	23	23	23	0	0	0	2	5	7	8	0	0	1	0	0	0	0	0	0	0	2	5	7	8	0	0	1	0	0	0	0	0	0	0	2	5	7	8
sp|Q9CWD8|NUBPL_MOUSE	Q9CWD8	NUBPL_MOUSE	Nubpl	319	18.8	Mus musculus OX=10090	1:Experimental evidence at protein level	Iron-sulfur protein NUBPL	1	0.999	3	5	5	5	0	0	0	0	1	2	1	0	0	1	0	0	0	0	0	0	0	0	1	2	1	0	0	1	0	0	0	0	0	0	0	0	1	2	1
sp|Q9CWJ9|PUR9_MOUSE	Q9CWJ9	PUR9_MOUSE	Atic	592	9	Mus musculus OX=10090	1:Experimental evidence at protein level	Bifunctional purine biosynthesis protein ATIC	1	0.999	3	5	5	5	0	0	0	0	2	2	1	0	0	0	0	0	0	0	0	0	0	0	2	2	1	0	0	0	0	0	0	0	0	0	0	0	2	2	1
sp|Q9CWK8|SNX2_MOUSE	Q9CWK8	SNX2_MOUSE	Snx2	519	23.9	Mus musculus OX=10090	1:Experimental evidence at protein level	Sorting nexin-2	1	0.999	11	56	49	56	3	2	3	6	7	8	6	5	7	7	0	0	1	1	3	2	3	5	6	7	5	4	6	6	0	0	1	1	3	2	3	6	7	8	6
sp|Q9CWP6|MSPD2_MOUSE	Q9CWP6	MSPD2_MOUSE	Mospd2	518	6.2	Mus musculus OX=10090	1:Experimental evidence at protein level	Motile sperm domain-containing protein 2	1	0.999	3	6	6	6	0	0	0	1	1	1	2	1	0	0	0	0	0	0	0	0	0	1	1	1	2	1	0	0	0	0	0	0	0	0	0	1	1	1	2
sp|Q9CWS0|DDAH1_MOUSE	Q9CWS0	DDAH1_MOUSE	Ddah1	285	32.6	Mus musculus OX=10090	1:Experimental evidence at protein level	N(G),N(G)-dimethylarginine dimethylaminohydrolase 1	1	0.999	8	43	35	43	3	2	2	2	7	8	7	3	5	4	0	0	0	0	2	2	2	1	6	7	6	2	4	3	0	0	0	0	3	2	2	2	7	8	7
sp|Q9CWZ3|RBM8A_MOUSE	Q9CWZ3	RBM8A_MOUSE	Rbm8a	174	35.6	Mus musculus OX=10090	1:Experimental evidence at protein level	RNA-binding protein 8A	1	0.999	4	6	6	6	0	0	0	0	2	2	2	0	0	0	0	0	0	0	0	0	0	0	2	2	2	0	0	0	0	0	0	0	0	0	0	0	2	2	2
sp|Q9CX00|IST1_MOUSE	Q9CX00	IST1_MOUSE	Ist1	362	9.1	Mus musculus OX=10090	1:Experimental evidence at protein level	IST1 homolog	1	0.999	4	10	10	10	0	0	1	1	2	1	2	1	1	1	0	0	0	0	0	0	1	1	2	1	2	1	1	1	0	0	0	0	0	0	1	1	2	1	2
sp|Q9CX34|SGT1_MOUSE	Q9CX34	SGT1_MOUSE	Sugt1	336	21.7	Mus musculus OX=10090	1:Experimental evidence at protein level	Protein SGT1 homolog	1	0.999	6	25	25	25	1	1	0	0	4	7	6	2	2	2	0	0	0	0	1	1	0	0	4	7	6	2	2	2	0	0	0	0	1	1	0	0	4	7	6
sp|Q9CX56|PSMD8_MOUSE	Q9CX56	PSMD8_MOUSE	Psmd8	353	11.9	Mus musculus OX=10090	1:Experimental evidence at protein level	26S proteasome non-ATPase regulatory subunit 8	1	0.999	5	30	30	30	3	3	2	4	5	5	3	0	0	2	0	1	1	1	3	3	2	4	5	5	3	0	0	2	0	1	1	1	3	3	2	4	5	5	3
sp|Q9CX86|ROA0_MOUSE	Q9CX86	ROA0_MOUSE	Hnrnpa0	305	21	Mus musculus OX=10090	1:Experimental evidence at protein level	Heterogeneous nuclear ribonucleoprotein A0	1	0.999	6	16	16	16	1	0	1	1	4	4	5	0	0	0	0	0	0	0	1	0	1	1	4	4	5	0	0	0	0	0	0	0	1	0	1	1	4	4	5
sp|Q9CXA2|T3HPD_MOUSE	Q9CXA2	T3HPD_MOUSE	L3hypdh	354	7.6	Mus musculus OX=10090	1:Experimental evidence at protein level	Trans-L-3-hydroxyproline dehydratase	1	0.999	2	7	7	7	1	1	0	1	1	1	2	0	0	0	0	0	0	0	1	1	0	1	1	1	2	0	0	0	0	0	0	0	1	1	0	1	1	1	2
sp|Q9CXF0|KYNU_MOUSE	Q9CXF0	KYNU_MOUSE	Kynu	464	23.7	Mus musculus OX=10090	1:Experimental evidence at protein level	Kynureninase	1	0.999	10	47	47	47	3	4	4	3	6	5	5	3	5	3	1	0	3	2	3	4	4	3	6	5	5	3	5	3	1	0	3	2	3	4	4	3	6	5	5
sp|Q9CXI0|COQ5_MOUSE	Q9CXI0	COQ5_MOUSE	Coq5	327	8	Mus musculus OX=10090	1:Experimental evidence at protein level	2-methoxy-6-polyprenyl-1,4-benzoquinol methylase, mitochondrial	1	0.999	2	4	4	4	0	0	0	0	1	1	2	0	0	0	0	0	0	0	0	0	0	0	1	1	2	0	0	0	0	0	0	0	0	0	0	0	1	1	2
sp|Q9CXJ1|SYEM_MOUSE	Q9CXJ1	SYEM_MOUSE	Ears2	523	6.7	Mus musculus OX=10090	1:Experimental evidence at protein level	Probable glutamate--tRNA ligase, mitochondrial	1	0.999	3	4	4	4	0	0	0	0	1	2	1	0	0	0	0	0	0	0	0	0	0	0	1	2	1	0	0	0	0	0	0	0	0	0	0	0	1	2	1
sp|Q9CXJ4|MITOS_MOUSE	Q9CXJ4	MITOS_MOUSE	Abcb8	717	11.6	Mus musculus OX=10090	1:Experimental evidence at protein level	Mitochondrial potassium channel ATP-binding subunit	1	0.999	5	7	7	7	0	1	0	0	4	1	1	0	0	0	0	0	0	0	0	1	0	0	4	1	1	0	0	0	0	0	0	0	0	1	0	0	4	1	1
sp|Q9CXN7|PBLD2_MOUSE	Q9CXN7	PBLD2_MOUSE	Pbld2	288	47.6	Mus musculus OX=10090	1:Experimental evidence at protein level	Phenazine biosynthesis-like domain-containing protein 2	1	0.999	14	34	34	87	1	1	1	2	4	5	4	3	5	6	0	0	1	1	1	1	1	2	4	5	4	3	5	6	0	0	1	1	5	4	5	7	8	9	7
sp|Q9CXR1|DHRS7_MOUSE	Q9CXR1	DHRS7_MOUSE	Dhrs7	338	15.1	Mus musculus OX=10090	1:Experimental evidence at protein level	Dehydrogenase/reductase SDR family member 7	1	0.999	5	10	10	10	0	1	0	3	1	2	1	1	0	1	0	0	0	0	0	1	0	3	1	2	1	1	0	1	0	0	0	0	0	1	0	3	1	2	1
sp|Q9CXS4|CENPV_MOUSE	Q9CXS4	CENPV_MOUSE	Cenpv	252	32.9	Mus musculus OX=10090	1:Experimental evidence at protein level	Centromere protein V	1	0.999	7	41	41	41	3	4	3	4	7	4	4	3	1	3	2	0	1	2	3	4	3	4	7	4	4	3	1	3	2	0	1	2	3	4	3	4	7	4	4
sp|Q9CXT8|MPPB_MOUSE	Q9CXT8	MPPB_MOUSE	Pmpcb	489	15.5	Mus musculus OX=10090	1:Experimental evidence at protein level	Mitochondrial-processing peptidase subunit beta	1	0.999	4	16	16	30	1	0	3	1	2	1	2	2	2	2	0	0	0	0	1	0	3	1	2	1	2	2	2	2	0	0	0	0	2	1	4	2	3	2	3
sp|Q9CXW2|RT22_MOUSE	Q9CXW2	RT22_MOUSE	Mrps22	359	14.5	Mus musculus OX=10090	1:Experimental evidence at protein level	28S ribosomal protein S22, mitochondrial	1	0.999	5	12	12	12	1	1	1	0	3	1	4	0	1	0	0	0	0	0	1	1	1	0	3	1	4	0	1	0	0	0	0	0	1	1	1	0	3	1	4
sp|Q9CXW3|CYBP_MOUSE	Q9CXW3	CYBP_MOUSE	Cacybp	229	35.8	Mus musculus OX=10090	1:Experimental evidence at protein level	Calcyclin-binding protein	1	0.999	5	10	10	10	0	0	0	0	1	3	3	1	0	2	0	0	0	0	0	0	0	0	1	3	3	1	0	2	0	0	0	0	0	0	0	0	1	3	3
sp|Q9CXZ1|NDUS4_MOUSE	Q9CXZ1	NDUS4_MOUSE	Ndufs4	175	34.9	Mus musculus OX=10090	1:Experimental evidence at protein level	NADH dehydrogenase [ubiquinone] iron-sulfur protein 4, mitochondrial	1	0.999	6	51	51	51	5	5	5	4	6	5	5	3	3	3	2	1	2	2	5	5	5	4	6	5	5	3	3	3	2	1	2	2	5	5	5	4	6	5	5
sp|Q9CY27|TECR_MOUSE	Q9CY27	TECR_MOUSE	Tecr	308	27.3	Mus musculus OX=10090	1:Experimental evidence at protein level	Very-long-chain enoyl-CoA reductase	1	0.999	12	89	89	89	7	8	9	9	11	10	9	8	7	8	1	0	1	1	7	8	9	9	11	10	9	8	7	8	1	0	1	1	7	8	9	9	11	10	9
sp|Q9CY50|SSRA_MOUSE	Q9CY50	SSRA_MOUSE	Ssr1	286	19.9	Mus musculus OX=10090	1:Experimental evidence at protein level	Translocon-associated protein subunit alpha	1	0.999	4	35	35	35	3	3	3	2	3	3	3	3	3	4	2	1	1	1	3	3	3	2	3	3	3	3	3	4	2	1	1	1	3	3	3	2	3	3	3
sp|Q9CY58|PAIRB_MOUSE	Q9CY58	PAIRB_MOUSE	Serbp1	407	41.3	Mus musculus OX=10090	1:Experimental evidence at protein level	Plasminogen activator inhibitor 1 RNA-binding protein	1	0.999	14	91	91	91	8	9	6	7	16	14	14	3	3	4	2	0	2	3	8	9	6	7	16	14	14	3	3	4	2	0	2	3	8	9	6	7	16	14	14
sp|Q9CY64|BIEA_MOUSE	Q9CY64	BIEA_MOUSE	Blvra	295	29.5	Mus musculus OX=10090	1:Experimental evidence at protein level	Biliverdin reductase A	1	0.999	6	25	25	25	1	1	0	0	5	3	4	2	5	4	0	0	0	0	1	1	0	0	5	3	4	2	5	4	0	0	0	0	1	1	0	0	5	3	4
sp|Q9CYH2|PXL2A_MOUSE	Q9CYH2	PXL2A_MOUSE	Prxl2a	218	7.3	Mus musculus OX=10090	1:Experimental evidence at protein level	Peroxiredoxin-like 2A	1	0.9988	2	2	2	2	0	0	0	0	0	2	0	0	0	0	0	0	0	0	0	0	0	0	0	2	0	0	0	0	0	0	0	0	0	0	0	0	0	2	0
sp|Q9CYN2|SPCS2_MOUSE	Q9CYN2	SPCS2_MOUSE	Spcs2	226	38.5	Mus musculus OX=10090	1:Experimental evidence at protein level	Signal peptidase complex subunit 2	1	0.999	5	23	23	23	3	3	1	1	6	3	4	1	0	0	0	0	1	0	3	3	1	1	6	3	4	1	0	0	0	0	1	0	3	3	1	1	6	3	4
sp|Q9CYR0|SSBP_MOUSE	Q9CYR0	SSBP_MOUSE	Ssbp1	152	15.1	Mus musculus OX=10090	1:Experimental evidence at protein level	Single-stranded DNA-binding protein, mitochondrial	1	0.999	2	8	8	8	0	0	2	0	3	2	1	0	0	0	0	0	0	0	0	0	2	0	3	2	1	0	0	0	0	0	0	0	0	0	2	0	3	2	1
sp|Q9CYR6|AGM1_MOUSE	Q9CYR6	AGM1_MOUSE	Pgm3	542	5.7	Mus musculus OX=10090	1:Experimental evidence at protein level	Phosphoacetylglucosamine mutase	1	0.9989	2	5	5	5	0	0	0	0	0	0	0	2	1	2	0	0	0	0	0	0	0	0	0	0	0	2	1	2	0	0	0	0	0	0	0	0	0	0	0
sp|Q9CYW4|HDHD3_MOUSE	Q9CYW4	HDHD3_MOUSE	Hdhd3	251	25.1	Mus musculus OX=10090	1:Experimental evidence at protein level	Haloacid dehalogenase-like hydrolase domain-containing protein 3	1	0.999	6	19	19	19	0	0	1	0	5	6	4	0	2	1	0	0	0	0	0	0	1	0	5	6	4	0	2	1	0	0	0	0	0	0	1	0	5	6	4
sp|Q9CYZ2|TPD54_MOUSE	Q9CYZ2	TPD54_MOUSE	Tpd52l2	220	39.1	Mus musculus OX=10090	1:Experimental evidence at protein level	Tumor protein D54	1	0.999	6	24	24	24	1	2	2	2	4	7	4	0	1	1	0	0	0	0	1	2	2	2	4	7	4	0	1	1	0	0	0	0	1	2	2	2	4	7	4
sp|Q9CZ04|CSN7A_MOUSE	Q9CZ04	CSN7A_MOUSE	Cops7a	275	29.8	Mus musculus OX=10090	1:Experimental evidence at protein level	COP9 signalosome complex subunit 7a	1	0.999	6	19	19	19	0	0	0	0	6	5	6	0	1	1	0	0	0	0	0	0	0	0	6	5	6	0	1	1	0	0	0	0	0	0	0	0	6	5	6
sp|Q9CZ13|QCR1_MOUSE	Q9CZ13	QCR1_MOUSE	Uqcrc1	480	44	Mus musculus OX=10090	1:Experimental evidence at protein level	Cytochrome b-c1 complex subunit 1, mitochondrial	1	0.999	19	212	198	212	18	17	16	16	26	18	22	12	14	17	9	5	12	10	17	16	15	15	25	17	21	11	13	16	8	4	11	9	18	17	16	16	26	18	22
sp|Q9CZ30|OLA1_MOUSE	Q9CZ30	OLA1_MOUSE	Ola1	396	16.2	Mus musculus OX=10090	1:Experimental evidence at protein level	Obg-like ATPase 1	1	0.999	6	30	30	30	2	3	2	2	4	6	3	2	3	3	0	0	0	0	2	3	2	2	4	6	3	2	3	3	0	0	0	0	2	3	2	2	4	6	3
sp|Q9CZ42|NNRD_MOUSE	Q9CZ42	NNRD_MOUSE	Naxd	343	17.5	Mus musculus OX=10090	1:Experimental evidence at protein level	ATP-dependent (S)-NAD(P)H-hydrate dehydratase	1	0.999	4	12	12	12	1	0	1	0	3	3	3	0	1	0	0	0	0	0	1	0	1	0	3	3	3	0	1	0	0	0	0	0	1	0	1	0	3	3	3
sp|Q9CZ44|NSF1C_MOUSE	Q9CZ44	NSF1C_MOUSE	Nsfl1c	370	50.5	Mus musculus OX=10090	1:Experimental evidence at protein level	NSFL1 cofactor p47	1	0.999	14	69	69	69	3	4	3	4	15	11	13	6	5	5	0	0	0	0	3	4	3	4	15	11	13	6	5	5	0	0	0	0	3	4	3	4	15	11	13
sp|Q9CZB0|C560_MOUSE	Q9CZB0	C560_MOUSE	Sdhc	169	14.2	Mus musculus OX=10090	1:Experimental evidence at protein level	Succinate dehydrogenase cytochrome b560 subunit, mitochondrial	1	0.999	2	14	14	14	2	2	2	2	2	1	1	0	1	1	0	0	0	0	2	2	2	2	2	1	1	0	1	1	0	0	0	0	2	2	2	2	2	1	1
sp|Q9CZD3|GARS_MOUSE	Q9CZD3	GARS_MOUSE	Gars1	729	14.4	Mus musculus OX=10090	1:Experimental evidence at protein level	Glycine--tRNA ligase	1	0.999	9	23	23	23	0	2	1	1	6	5	4	1	2	0	0	0	0	1	0	2	1	1	6	5	4	1	2	0	0	0	0	1	0	2	1	1	6	5	4
sp|Q9CZM2|RL15_MOUSE	Q9CZM2	RL15_MOUSE	Rpl15	204	54.4	Mus musculus OX=10090	1:Experimental evidence at protein level	60S ribosomal protein L15	1	0.999	11	87	87	87	10	9	6	8	11	9	8	4	3	5	3	3	5	3	10	9	6	8	11	9	8	4	3	5	3	3	5	3	10	9	6	8	11	9	8
sp|Q9CZN7|GLYM_MOUSE	Q9CZN7	GLYM_MOUSE	Shmt2	504	52.8	Mus musculus OX=10090	1:Experimental evidence at protein level	Serine hydroxymethyltransferase, mitochondrial	1	0.999	26	236	233	236	19	18	16	17	28	22	26	19	19	18	8	7	8	11	19	18	16	17	28	22	26	18	18	17	8	7	8	11	19	18	16	17	28	22	26
sp|Q9CZU6|CISY_MOUSE	Q9CZU6	CISY_MOUSE	Cs	464	35.6	Mus musculus OX=10090	1:Experimental evidence at protein level	Citrate synthase, mitochondrial	1	0.999	14	114	114	114	8	7	8	9	13	11	9	13	9	8	4	5	5	5	8	7	8	9	13	11	9	13	9	8	4	5	5	5	8	7	8	9	13	11	9
sp|Q9CZW5|TOM70_MOUSE	Q9CZW5	TOM70_MOUSE	Tomm70	611	21.3	Mus musculus OX=10090	1:Experimental evidence at protein level	Mitochondrial import receptor subunit TOM70	1	0.999	14	58	58	58	4	4	4	5	8	9	7	6	6	5	0	0	0	0	4	4	4	5	8	9	7	6	6	5	0	0	0	0	4	4	4	5	8	9	7
sp|Q9CZX8|RS19_MOUSE	Q9CZX8	RS19_MOUSE	Rps19	145	50.3	Mus musculus OX=10090	1:Experimental evidence at protein level	40S ribosomal protein S19	1	0.999	10	69	69	69	5	6	8	8	10	7	9	3	3	3	1	1	2	3	5	6	8	8	10	7	9	3	3	3	1	1	2	3	5	6	8	8	10	7	9
sp|Q9CZX9|EMC4_MOUSE	Q9CZX9	EMC4_MOUSE	Emc4	183	14.2	Mus musculus OX=10090	1:Experimental evidence at protein level	ER membrane protein complex subunit 4	1	0.999	2	10	10	10	0	1	1	1	2	1	3	1	0	0	0	0	0	0	0	1	1	1	2	1	3	1	0	0	0	0	0	0	0	1	1	1	2	1	3
sp|Q9D020|5NT3A_MOUSE	Q9D020	5NT3A_MOUSE	Nt5c3a	331	22.4	Mus musculus OX=10090	1:Experimental evidence at protein level	Cytosolic 5'-nucleotidase 3A	1	0.999	5	8	8	8	0	0	0	0	4	2	2	0	0	0	0	0	0	0	0	0	0	0	4	2	2	0	0	0	0	0	0	0	0	0	0	0	4	2	2
sp|Q9D024|CCD47_MOUSE	Q9D024	CCD47_MOUSE	Ccdc47	483	19.5	Mus musculus OX=10090	1:Experimental evidence at protein level	PAT complex subunit CCDC47	1	0.999	11	32	32	32	2	3	1	3	7	2	7	2	2	2	0	0	0	1	2	3	1	3	7	2	7	2	2	2	0	0	0	1	2	3	1	3	7	2	7
sp|Q9D051|ODPB_MOUSE	Q9D051	ODPB_MOUSE	Pdhb	359	40.9	Mus musculus OX=10090	1:Experimental evidence at protein level	Pyruvate dehydrogenase E1 component subunit beta, mitochondrial	1	0.999	11	82	82	82	6	6	5	6	11	8	8	10	7	10	0	0	3	2	6	6	5	6	11	8	8	10	7	10	0	0	3	2	6	6	5	6	11	8	8
sp|Q9D0B0|SRSF9_MOUSE	Q9D0B0	SRSF9_MOUSE	Srsf9	222	22.5	Mus musculus OX=10090	1:Experimental evidence at protein level	Serine/arginine-rich splicing factor 9	1	0.9977	3	4	4	4	0	0	0	0	2	1	1	0	0	0	0	0	0	0	0	0	0	0	2	1	1	0	0	0	0	0	0	0	0	0	0	0	2	1	1
sp|Q9D0E1|HNRPM_MOUSE	Q9D0E1	HNRPM_MOUSE	Hnrnpm	729	33.5	Mus musculus OX=10090	1:Experimental evidence at protein level	Heterogeneous nuclear ribonucleoprotein M	1	0.999	19	131	131	131	10	12	7	10	17	14	17	10	9	11	4	2	3	5	10	12	7	10	17	14	17	10	9	11	4	2	3	5	10	12	7	10	17	14	17
sp|Q9D0F3|LMAN1_MOUSE	Q9D0F3	LMAN1_MOUSE	Lman1	517	38.3	Mus musculus OX=10090	1:Experimental evidence at protein level	Protein ERGIC-53	1	0.999	19	168	168	168	16	12	14	17	18	16	18	9	16	13	6	4	5	4	16	12	14	17	18	16	18	9	16	13	6	4	5	4	16	12	14	17	18	16	18
sp|Q9D0F9|PGM1_MOUSE	Q9D0F9	PGM1_MOUSE	Pgm1	562	63.2	Mus musculus OX=10090	1:Experimental evidence at protein level	Phosphoglucomutase-1	1	0.999	27	151	151	151	8	12	11	11	18	20	17	15	17	17	2	0	1	2	8	12	11	11	18	20	17	15	17	17	2	0	1	2	8	12	11	11	18	20	17
sp|Q9D0I9|SYRC_MOUSE	Q9D0I9	SYRC_MOUSE	Rars1	660	21.8	Mus musculus OX=10090	1:Experimental evidence at protein level	Arginine--tRNA ligase, cytoplasmic	1	0.999	14	74	74	74	5	7	3	4	12	12	12	6	4	9	0	0	0	0	5	7	3	4	12	12	12	6	4	9	0	0	0	0	5	7	3	4	12	12	12
sp|Q9D0J8|PTMS_MOUSE	Q9D0J8	PTMS_MOUSE	Ptms	101	22.8	Mus musculus OX=10090	1:Experimental evidence at protein level	Parathymosin	1	0.999	3	27	27	27	2	3	2	2	3	2	5	2	2	2	0	0	1	1	2	3	2	2	3	2	5	2	2	2	0	0	1	1	2	3	2	2	3	2	5
sp|Q9D0M1|KPRA_MOUSE	Q9D0M1	KPRA_MOUSE	Prpsap1	356	13.8	Mus musculus OX=10090	1:Experimental evidence at protein level	Phosphoribosyl pyrophosphate synthase-associated protein 1	1	0.999	3	18	6	18	1	1	1	0	4	3	3	0	2	3	0	0	0	0	0	0	0	0	2	2	2	0	0	0	0	0	0	0	1	1	1	0	4	3	3
sp|Q9D0M3|CY1_MOUSE	Q9D0M3	CY1_MOUSE	Cyc1	325	30.5	Mus musculus OX=10090	1:Experimental evidence at protein level	Cytochrome c1, heme protein, mitochondrial	1	0.999	9	111	111	111	7	6	5	7	18	15	18	5	12	8	4	2	2	2	7	6	5	7	18	15	18	5	12	8	4	2	2	2	7	6	5	7	18	15	18
sp|Q9D0P0|EBPL_MOUSE	Q9D0P0	EBPL_MOUSE	Ebpl	206	4.9	Mus musculus OX=10090	2:Experimental evidence at transcript level	Emopamil-binding protein-like	1	0.999	2	10	10	10	1	1	1	1	2	1	0	1	1	1	0	0	0	0	1	1	1	1	2	1	0	1	1	1	0	0	0	0	1	1	1	1	2	1	0
sp|Q9D0S9|HINT2_MOUSE	Q9D0S9	HINT2_MOUSE	Hint2	163	42.3	Mus musculus OX=10090	1:Experimental evidence at protein level	Adenosine 5'-monophosphoramidase HINT2	1	0.999	4	32	32	32	3	3	3	3	4	4	4	2	3	2	1	0	0	0	3	3	3	3	4	4	4	2	3	2	1	0	0	0	3	3	3	3	4	4	4
sp|Q9D0T1|NH2L1_MOUSE	Q9D0T1	NH2L1_MOUSE	Snu13	128	15.6	Mus musculus OX=10090	1:Experimental evidence at protein level	NHP2-like protein 1	1	0.999	2	10	10	10	2	1	0	1	2	1	1	0	1	1	0	0	0	0	2	1	0	1	2	1	1	0	1	1	0	0	0	0	2	1	0	1	2	1	1
sp|Q9D172|GAL3A_MOUSE	Q9D172	GAL3A_MOUSE	Gatd3	266	41	Mus musculus OX=10090	1:Experimental evidence at protein level	Glutamine amidotransferase-like class 1 domain-containing protein 3, mitochondrial	1	0.999	8	64	64	64	4	4	3	4	9	7	10	4	4	3	3	3	3	3	4	4	3	4	9	7	10	4	4	3	3	3	3	3	4	4	3	4	9	7	10
sp|Q9D1A2|CNDP2_MOUSE	Q9D1A2	CNDP2_MOUSE	Cndp2	475	20.8	Mus musculus OX=10090	1:Experimental evidence at protein level	Cytosolic non-specific dipeptidase	1	0.999	7	27	27	27	0	3	1	0	4	4	5	2	4	4	0	0	0	0	0	3	1	0	4	4	5	2	4	4	0	0	0	0	0	3	1	0	4	4	5
sp|Q9D1D4|TMEDA_MOUSE	Q9D1D4	TMEDA_MOUSE	Tmed10	219	27.4	Mus musculus OX=10090	1:Experimental evidence at protein level	Transmembrane emp24 domain-containing protein 10	1	0.999	5	33	33	33	2	2	2	3	4	5	6	1	1	2	2	1	1	1	2	2	2	3	4	5	6	1	1	2	2	1	1	1	2	2	2	3	4	5	6
sp|Q9D1E6|TBCB_MOUSE	Q9D1E6	TBCB_MOUSE	Tbcb	244	8.6	Mus musculus OX=10090	1:Experimental evidence at protein level	Tubulin-folding cofactor B	1	0.999	2	12	12	12	0	1	1	1	2	2	2	1	1	1	0	0	0	0	0	1	1	1	2	2	2	1	1	1	0	0	0	0	0	1	1	1	2	2	2
sp|Q9D1G2|PMVK_MOUSE	Q9D1G2	PMVK_MOUSE	Pmvk	192	9.9	Mus musculus OX=10090	1:Experimental evidence at protein level	Phosphomevalonate kinase	1	0.999	2	5	5	5	0	0	0	0	2	1	2	0	0	0	0	0	0	0	0	0	0	0	2	1	2	0	0	0	0	0	0	0	0	0	0	0	2	1	2
sp|Q9D1H8|RM53_MOUSE	Q9D1H8	RM53_MOUSE	Mrpl53	118	16.9	Mus musculus OX=10090	1:Experimental evidence at protein level	39S ribosomal protein L53, mitochondrial	1	0.999	2	7	7	7	0	1	0	0	2	2	2	0	0	0	0	0	0	0	0	1	0	0	2	2	2	0	0	0	0	0	0	0	0	1	0	0	2	2	2
sp|Q9D1J3|SARNP_MOUSE	Q9D1J3	SARNP_MOUSE	Sarnp	210	13.8	Mus musculus OX=10090	1:Experimental evidence at protein level	SAP domain-containing ribonucleoprotein	1	0.999	3	8	8	8	0	0	0	0	3	3	2	0	0	0	0	0	0	0	0	0	0	0	3	3	2	0	0	0	0	0	0	0	0	0	0	0	3	3	2
sp|Q9D1M0|SEC13_MOUSE	Q9D1M0	SEC13_MOUSE	Sec13	322	15.2	Mus musculus OX=10090	1:Experimental evidence at protein level	Protein SEC13 homolog	1	0.999	4	9	9	9	1	0	0	0	4	2	2	0	0	0	0	0	0	0	1	0	0	0	4	2	2	0	0	0	0	0	0	0	1	0	0	0	4	2	2
sp|Q9D1M4|MCA3_MOUSE	Q9D1M4	MCA3_MOUSE	Eef1e1	174	12.1	Mus musculus OX=10090	1:Experimental evidence at protein level	Eukaryotic translation elongation factor 1 epsilon-1	1	0.999	2	6	6	6	0	0	0	0	2	2	2	0	0	0	0	0	0	0	0	0	0	0	2	2	2	0	0	0	0	0	0	0	0	0	0	0	2	2	2
sp|Q9D1Q6|ERP44_MOUSE	Q9D1Q6	ERP44_MOUSE	Erp44	406	28.6	Mus musculus OX=10090	1:Experimental evidence at protein level	Endoplasmic reticulum resident protein 44	1	0.999	10	67	67	67	5	6	3	4	9	9	9	6	7	6	1	0	1	1	5	6	3	4	9	9	9	6	7	6	1	0	1	1	5	6	3	4	9	9	9
sp|Q9D1R9|RL34_MOUSE	Q9D1R9	RL34_MOUSE	Rpl34	117	29.9	Mus musculus OX=10090	1:Experimental evidence at protein level	60S ribosomal protein L34	1	0.999	6	38	38	38	2	2	2	2	4	4	5	2	3	2	4	2	2	2	2	2	2	2	4	4	5	2	3	2	4	2	2	2	2	2	2	2	4	4	5
sp|Q9D281|NXP20_MOUSE	Q9D281	NXP20_MOUSE	Fam114a1	569	13.9	Mus musculus OX=10090	1:Experimental evidence at protein level	Protein Noxp20	1	0.999	5	12	12	12	1	0	1	0	5	1	2	0	1	1	0	0	0	0	1	0	1	0	5	1	2	0	1	1	0	0	0	0	1	0	1	0	5	1	2
sp|Q9D2G2|ODO2_MOUSE	Q9D2G2	ODO2_MOUSE	Dlst	454	31.7	Mus musculus OX=10090	1:Experimental evidence at protein level	Dihydrolipoyllysine-residue succinyltransferase component of 2-oxoglutarate dehydrogenase complex, mitochondrial	1	0.999	12	127	127	127	9	9	8	9	14	11	11	6	13	12	8	4	6	7	9	9	8	9	14	11	11	6	13	12	8	4	6	7	9	9	8	9	14	11	11
sp|Q9D2R0|AACS_MOUSE	Q9D2R0	AACS_MOUSE	Aacs	672	11.9	Mus musculus OX=10090	1:Experimental evidence at protein level	Acetoacetyl-CoA synthetase	1	0.999	7	18	18	18	2	0	1	3	2	2	4	2	2	0	0	0	0	0	2	0	1	3	2	2	4	2	2	0	0	0	0	0	2	0	1	3	2	2	4
sp|Q9D2R6|COA3_MOUSE	Q9D2R6	COA3_MOUSE	Coa3	108	28.7	Mus musculus OX=10090	1:Experimental evidence at protein level	Cytochrome c oxidase assembly factor 3 homolog, mitochondrial	1	0.999	3	13	13	13	1	1	1	1	3	2	1	1	1	1	0	0	0	0	1	1	1	1	3	2	1	1	1	1	0	0	0	0	1	1	1	1	3	2	1
sp|Q9D2V7|CORO7_MOUSE	Q9D2V7	CORO7_MOUSE	Coro7	922	7.9	Mus musculus OX=10090	1:Experimental evidence at protein level	Coronin-7	1	0.999	6	18	18	18	1	1	1	1	3	5	3	1	1	1	0	0	0	0	1	1	1	1	3	5	3	1	1	1	0	0	0	0	1	1	1	1	3	5	3
sp|Q9D379|HYEP_MOUSE	Q9D379	HYEP_MOUSE	Ephx1	455	58.5	Mus musculus OX=10090	1:Experimental evidence at protein level	Epoxide hydrolase 1	1	0.999	30	255	255	255	17	20	23	24	24	28	23	21	17	20	13	8	9	8	17	20	23	24	24	28	23	21	17	20	13	8	9	8	17	20	23	24	24	28	23
sp|Q9D3D9|ATPD_MOUSE	Q9D3D9	ATPD_MOUSE	Atp5f1d	168	34.5	Mus musculus OX=10090	1:Experimental evidence at protein level	ATP synthase subunit delta, mitochondrial	1	0.999	3	30	30	30	2	2	2	2	3	3	2	2	2	2	2	2	2	2	2	2	2	2	3	3	2	2	2	2	2	2	2	2	2	2	2	2	3	3	2
sp|Q9D404|OXSM_MOUSE	Q9D404	OXSM_MOUSE	Oxsm	459	17	Mus musculus OX=10090	1:Experimental evidence at protein level	3-oxoacyl-[acyl-carrier-protein] synthase, mitochondrial	1	0.999	5	26	26	26	2	1	1	2	4	5	4	2	2	3	0	0	0	0	2	1	1	2	4	5	4	2	2	3	0	0	0	0	2	1	1	2	4	5	4
sp|Q9D4H8|CUL2_MOUSE	Q9D4H8	CUL2_MOUSE	Cul2	745	4.7	Mus musculus OX=10090	1:Experimental evidence at protein level	Cullin-2	1	0.999	2	3	3	3	0	0	0	0	1	1	1	0	0	0	0	0	0	0	0	0	0	0	1	1	1	0	0	0	0	0	0	0	0	0	0	0	1	1	1
sp|Q9D554|SF3A3_MOUSE	Q9D554	SF3A3_MOUSE	Sf3a3	501	8.2	Mus musculus OX=10090	1:Experimental evidence at protein level	Splicing factor 3A subunit 3	1	0.999	4	6	6	6	0	0	0	0	2	1	1	0	1	1	0	0	0	0	0	0	0	0	2	1	1	0	1	1	0	0	0	0	0	0	0	0	2	1	1
sp|Q9D5J6|SHPK_MOUSE	Q9D5J6	SHPK_MOUSE	Shpk	476	22.9	Mus musculus OX=10090	1:Experimental evidence at protein level	Sedoheptulokinase	1	0.999	9	70	70	70	7	7	8	6	7	8	10	3	4	4	1	0	2	3	7	7	8	6	7	8	10	3	4	4	1	0	2	3	7	7	8	6	7	8	10
sp|Q9D5T0|ATAD1_MOUSE	Q9D5T0	ATAD1_MOUSE	Atad1	361	9.1	Mus musculus OX=10090	1:Experimental evidence at protein level	Outer mitochondrial transmembrane helix translocase	1	0.999	2	5	5	5	0	0	1	0	1	2	1	0	0	0	0	0	0	0	0	0	1	0	1	2	1	0	0	0	0	0	0	0	0	0	1	0	1	2	1
sp|Q9D5V6|SYAP1_MOUSE	Q9D5V6	SYAP1_MOUSE	Syap1	365	19.7	Mus musculus OX=10090	1:Experimental evidence at protein level	Synapse-associated protein 1	1	0.999	4	8	8	8	0	0	0	0	1	2	4	0	1	0	0	0	0	0	0	0	0	0	1	2	4	0	1	0	0	0	0	0	0	0	0	0	1	2	4
sp|Q9D662|SC23B_MOUSE	Q9D662	SC23B_MOUSE	Sec23b	767	7.6	Mus musculus OX=10090	1:Experimental evidence at protein level	Protein transport protein Sec23B	1	0.999	4	8	8	10	0	0	0	0	2	3	3	0	0	0	0	0	0	0	0	0	0	0	2	3	3	0	0	0	0	0	0	0	0	0	0	0	2	4	4
sp|Q9D6J5|NDUB8_MOUSE	Q9D6J5	NDUB8_MOUSE	Ndufb8	186	23.7	Mus musculus OX=10090	1:Experimental evidence at protein level	NADH dehydrogenase [ubiquinone] 1 beta subcomplex subunit 8, mitochondrial	1	0.999	4	30	30	30	2	2	3	3	3	3	3	2	2	2	1	1	1	2	2	2	3	3	3	3	3	2	2	2	1	1	1	2	2	2	3	3	3	3	3
sp|Q9D6J6|NDUV2_MOUSE	Q9D6J6	NDUV2_MOUSE	Ndufv2	248	35.5	Mus musculus OX=10090	1:Experimental evidence at protein level	NADH dehydrogenase [ubiquinone] flavoprotein 2, mitochondrial	1	0.999	8	47	47	47	4	4	2	2	9	6	7	4	3	4	0	0	1	1	4	4	2	2	9	6	7	4	3	4	0	0	1	1	4	4	2	2	9	6	7
sp|Q9D6K5|SYJ2B_MOUSE	Q9D6K5	SYJ2B_MOUSE	Synj2bp	145	52.4	Mus musculus OX=10090	1:Experimental evidence at protein level	Synaptojanin-2-binding protein	1	0.999	5	28	28	28	4	3	3	4	3	3	3	0	2	1	1	0	1	0	4	3	3	4	3	3	3	0	2	1	1	0	1	0	4	3	3	4	3	3	3
sp|Q9D6R2|IDH3A_MOUSE	Q9D6R2	IDH3A_MOUSE	Idh3a	366	28.4	Mus musculus OX=10090	1:Experimental evidence at protein level	Isocitrate dehydrogenase [NAD] subunit alpha, mitochondrial	1	0.999	8	52	52	52	3	3	4	4	7	8	9	5	4	5	0	0	0	0	3	3	4	4	7	8	9	5	4	5	0	0	0	0	3	3	4	4	7	8	9
sp|Q9D6U8|F162A_MOUSE	Q9D6U8	F162A_MOUSE	Fam162a	155	16.8	Mus musculus OX=10090	1:Experimental evidence at protein level	Protein FAM162A	1	0.999	4	16	16	16	2	1	2	1	3	2	4	0	0	1	0	0	0	0	2	1	2	1	3	2	4	0	0	1	0	0	0	0	2	1	2	1	3	2	4
sp|Q9D6Y7|MSRA_MOUSE	Q9D6Y7	MSRA_MOUSE	Msra	233	45.1	Mus musculus OX=10090	1:Experimental evidence at protein level	Mitochondrial peptide methionine sulfoxide reductase	1	0.999	8	60	60	60	6	3	5	4	7	8	8	4	8	7	0	0	0	0	6	3	5	4	7	8	8	4	8	7	0	0	0	0	6	3	5	4	7	8	8
sp|Q9D6Y9|GLGB_MOUSE	Q9D6Y9	GLGB_MOUSE	Gbe1	702	27.6	Mus musculus OX=10090	1:Experimental evidence at protein level	1,4-alpha-glucan-branching enzyme	1	0.999	18	92	92	92	6	5	7	10	12	8	7	12	12	12	0	0	1	0	6	5	7	10	12	8	7	12	12	12	0	0	1	0	6	5	7	10	12	8	7
sp|Q9D6Z1|NOP56_MOUSE	Q9D6Z1	NOP56_MOUSE	Nop56	580	20.2	Mus musculus OX=10090	1:Experimental evidence at protein level	Nucleolar protein 56	1	0.999	11	28	28	28	3	2	0	2	5	8	6	0	1	1	0	0	0	0	3	2	0	2	5	8	6	0	1	1	0	0	0	0	3	2	0	2	5	8	6
sp|Q9D710|TMX2_MOUSE	Q9D710	TMX2_MOUSE	Tmx2	295	5.8	Mus musculus OX=10090	1:Experimental evidence at protein level	Thioredoxin-related transmembrane protein 2	1	0.999	2	6	6	6	0	1	0	0	2	2	1	0	0	0	0	0	0	0	0	1	0	0	2	2	1	0	0	0	0	0	0	0	0	1	0	0	2	2	1
sp|Q9D7A8|ARMC1_MOUSE	Q9D7A8	ARMC1_MOUSE	Armc1	282	11.7	Mus musculus OX=10090	1:Experimental evidence at protein level	Armadillo repeat-containing protein 1	1	0.999	2	2	2	2	0	0	0	0	0	1	0	1	0	0	0	0	0	0	0	0	0	0	0	1	0	1	0	0	0	0	0	0	0	0	0	0	0	1	0
sp|Q9D7B6|ACAD8_MOUSE	Q9D7B6	ACAD8_MOUSE	Acad8	413	38.7	Mus musculus OX=10090	1:Experimental evidence at protein level	Isobutyryl-CoA dehydrogenase, mitochondrial	1	0.999	15	57	57	57	3	3	5	3	9	7	6	4	6	6	1	1	2	1	3	3	5	3	9	7	6	4	6	6	1	1	2	1	3	3	5	3	9	7	6
sp|Q9D7G0|PRPS1_MOUSE	Q9D7G0	PRPS1_MOUSE	Prps1	318	20.1	Mus musculus OX=10090	1:Experimental evidence at protein level	Ribose-phosphate pyrophosphokinase 1	1	0.999	6	27	21	27	2	3	4	3	5	3	3	1	1	2	0	0	0	0	2	3	3	3	3	2	3	1	0	1	0	0	0	0	2	3	4	3	5	3	3
sp|Q9D7J4|COX20_MOUSE	Q9D7J4	COX20_MOUSE	Cox20	117	29.1	Mus musculus OX=10090	1:Experimental evidence at protein level	Cytochrome c oxidase assembly protein COX20, mitochondrial	1	0.999	2	8	8	8	0	1	1	1	2	0	3	0	0	0	0	0	0	0	0	1	1	1	2	0	3	0	0	0	0	0	0	0	0	1	1	1	2	0	3
sp|Q9D7J9|ECHD3_MOUSE	Q9D7J9	ECHD3_MOUSE	Echdc3	300	38	Mus musculus OX=10090	1:Experimental evidence at protein level	Enoyl-CoA hydratase domain-containing protein 3, mitochondrial	1	0.999	9	77	77	77	5	5	6	5	11	10	9	5	6	4	2	1	4	4	5	5	6	5	11	10	9	5	6	4	2	1	4	4	5	5	6	5	11	10	9
sp|Q9D7N3|RT09_MOUSE	Q9D7N3	RT09_MOUSE	Mrps9	390	8.5	Mus musculus OX=10090	1:Experimental evidence at protein level	28S ribosomal protein S9, mitochondrial	1	0.999	2	2	2	2	0	0	0	0	1	1	0	0	0	0	0	0	0	0	0	0	0	0	1	1	0	0	0	0	0	0	0	0	0	0	0	0	1	1	0
sp|Q9D7N9|APMAP_MOUSE	Q9D7N9	APMAP_MOUSE	Apmap	415	20.7	Mus musculus OX=10090	1:Experimental evidence at protein level	Adipocyte plasma membrane-associated protein	1	0.999	6	26	26	26	2	2	3	2	3	4	3	1	5	1	0	0	0	0	2	2	3	2	3	4	3	1	5	1	0	0	0	0	2	2	3	2	3	4	3
sp|Q9D7X3|DUS3_MOUSE	Q9D7X3	DUS3_MOUSE	Dusp3	185	22.7	Mus musculus OX=10090	1:Experimental evidence at protein level	Dual specificity protein phosphatase 3	1	0.999	3	8	8	8	0	0	0	0	3	1	2	0	1	1	0	0	0	0	0	0	0	0	3	1	2	0	1	1	0	0	0	0	0	0	0	0	3	1	2
sp|Q9D819|IPYR_MOUSE	Q9D819	IPYR_MOUSE	Ppa1	289	30.8	Mus musculus OX=10090	1:Experimental evidence at protein level	Inorganic pyrophosphatase	1	0.999	11	48	48	48	3	2	3	2	7	7	5	3	7	7	1	0	0	1	3	2	3	2	7	7	5	3	7	7	1	0	0	1	3	2	3	2	7	7	5
sp|Q9D826|SOX_MOUSE	Q9D826	SOX_MOUSE	Pipox	390	46.2	Mus musculus OX=10090	1:Experimental evidence at protein level	Peroxisomal sarcosine oxidase	1	0.999	16	145	145	145	13	10	9	12	16	12	12	10	12	13	7	4	7	8	13	10	9	12	16	12	12	10	12	13	7	4	7	8	13	10	9	12	16	12	12
sp|Q9D832|DNJB4_MOUSE	Q9D832	DNJB4_MOUSE	Dnajb4	337	7.1	Mus musculus OX=10090	1:Experimental evidence at protein level	DnaJ homolog subfamily B member 4	1	0.999	2	7	7	7	0	1	0	1	1	1	2	0	1	0	0	0	0	0	0	1	0	1	1	1	2	0	1	0	0	0	0	0	0	1	0	1	1	1	2
sp|Q9D855|QCR7_MOUSE	Q9D855	QCR7_MOUSE	Uqcrb	111	67.6	Mus musculus OX=10090	1:Experimental evidence at protein level	Cytochrome b-c1 complex subunit 7	1	0.999	13	125	125	125	10	11	9	8	18	15	15	6	9	11	3	2	4	4	10	11	9	8	18	15	15	6	9	11	3	2	4	4	10	11	9	8	18	15	15
sp|Q9D880|TIM50_MOUSE	Q9D880	TIM50_MOUSE	Timm50	353	11.3	Mus musculus OX=10090	1:Experimental evidence at protein level	Mitochondrial import inner membrane translocase subunit TIM50	1	0.999	4	20	20	20	2	2	2	2	2	1	2	3	2	2	0	0	0	0	2	2	2	2	2	1	2	3	2	2	0	0	0	0	2	2	2	2	2	1	2
sp|Q9D8B3|CHM4B_MOUSE	Q9D8B3	CHM4B_MOUSE	Chmp4b	224	20.5	Mus musculus OX=10090	1:Experimental evidence at protein level	Charged multivesicular body protein 4b	1	0.999	3	4	4	4	0	0	0	0	1	1	2	0	0	0	0	0	0	0	0	0	0	0	1	1	2	0	0	0	0	0	0	0	0	0	0	0	1	1	2
sp|Q9D8C4|IN35_MOUSE	Q9D8C4	IN35_MOUSE	Ifi35	286	11.9	Mus musculus OX=10090	1:Experimental evidence at protein level	Interferon-induced 35 kDa protein homolog	1	0.999	3	5	5	21	0	0	1	0	2	1	1	0	0	0	0	0	0	0	0	0	1	0	2	1	1	0	0	0	0	0	0	0	1	1	2	1	3	2	2
sp|Q9D8E6|RL4_MOUSE	Q9D8E6	RL4_MOUSE	Rpl4	419	43.9	Mus musculus OX=10090	1:Experimental evidence at protein level	60S ribosomal protein L4	1	0.999	20	151	151	151	13	12	11	12	19	18	18	8	7	8	6	5	6	8	13	12	11	12	19	18	18	8	7	8	6	5	6	8	13	12	11	12	19	18	18
sp|Q9D8N0|EF1G_MOUSE	Q9D8N0	EF1G_MOUSE	Eef1g	437	39.4	Mus musculus OX=10090	1:Experimental evidence at protein level	Elongation factor 1-gamma	1	0.999	22	238	238	238	18	20	21	19	24	25	24	18	16	17	12	7	8	9	18	20	21	19	24	25	24	18	16	17	12	7	8	9	18	20	21	19	24	25	24
sp|Q9D8S9|BOLA1_MOUSE	Q9D8S9	BOLA1_MOUSE	Bola1	137	12.4	Mus musculus OX=10090	1:Experimental evidence at protein level	BolA-like protein 1	1	0.999	1	3	3	3	0	0	0	0	1	1	1	0	0	0	0	0	0	0	0	0	0	0	1	1	1	0	0	0	0	0	0	0	0	0	0	0	1	1	1
sp|Q9D8T2|GSDMD_MOUSE	Q9D8T2	GSDMD_MOUSE	Gsdmd	487	15.6	Mus musculus OX=10090	1:Experimental evidence at protein level	Gasdermin-D	1	0.999	6	22	22	22	1	1	1	2	2	4	5	1	3	2	0	0	0	0	1	1	1	2	2	4	5	1	3	2	0	0	0	0	1	1	1	2	2	4	5
sp|Q9D8T7|SLIRP_MOUSE	Q9D8T7	SLIRP_MOUSE	Slirp	112	35.7	Mus musculus OX=10090	1:Experimental evidence at protein level	SRA stem-loop-interacting RNA-binding protein, mitochondrial	1	0.999	4	10	10	10	1	1	1	2	2	2	1	0	0	0	0	0	0	0	1	1	1	2	2	2	1	0	0	0	0	0	0	0	1	1	1	2	2	2	1
sp|Q9D8U8|SNX5_MOUSE	Q9D8U8	SNX5_MOUSE	Snx5	404	30.7	Mus musculus OX=10090	1:Experimental evidence at protein level	Sorting nexin-5	1	0.999	13	70	63	70	5	6	5	3	10	11	11	5	7	7	0	0	0	0	5	6	5	2	9	9	10	4	7	6	0	0	0	0	5	6	5	3	10	11	11
sp|Q9D8V0|HM13_MOUSE	Q9D8V0	HM13_MOUSE	Hm13	378	9.5	Mus musculus OX=10090	1:Experimental evidence at protein level	Minor histocompatibility antigen H13	1	0.999	2	18	18	18	0	0	1	0	4	3	5	1	2	2	0	0	0	0	0	0	1	0	4	3	5	1	2	2	0	0	0	0	0	0	1	0	4	3	5
sp|Q9D8W5|PSD12_MOUSE	Q9D8W5	PSD12_MOUSE	Psmd12	456	17.1	Mus musculus OX=10090	1:Experimental evidence at protein level	26S proteasome non-ATPase regulatory subunit 12	1	0.999	8	43	43	43	3	3	1	3	6	6	8	4	3	4	0	0	1	1	3	3	1	3	6	6	8	4	3	4	0	0	1	1	3	3	1	3	6	6	8
sp|Q9D8Y0|EFHD2_MOUSE	Q9D8Y0	EFHD2_MOUSE	Efhd2	240	21.7	Mus musculus OX=10090	1:Experimental evidence at protein level	EF-hand domain-containing protein D2	1	0.999	5	14	14	14	0	0	0	0	2	3	3	4	0	2	0	0	0	0	0	0	0	0	2	3	3	4	0	2	0	0	0	0	0	0	0	0	2	3	3
sp|Q9D906|ATG7_MOUSE	Q9D906	ATG7_MOUSE	Atg7	698	7.6	Mus musculus OX=10090	1:Experimental evidence at protein level	Ubiquitin-like modifier-activating enzyme ATG7	1	0.9979	3	4	4	4	0	0	0	0	1	0	0	2	1	0	0	0	0	0	0	0	0	0	1	0	0	2	1	0	0	0	0	0	0	0	0	0	1	0	0
sp|Q9D9V3|ECHD1_MOUSE	Q9D9V3	ECHD1_MOUSE	Echdc1	322	18.9	Mus musculus OX=10090	1:Experimental evidence at protein level	Ethylmalonyl-CoA decarboxylase	1	0.999	5	28	28	28	1	3	2	3	3	3	5	2	2	2	0	0	1	1	1	3	2	3	3	3	5	2	2	2	0	0	1	1	1	3	2	3	3	3	5
sp|Q9DAR7|DCPS_MOUSE	Q9DAR7	DCPS_MOUSE	Dcps	338	19.5	Mus musculus OX=10090	1:Experimental evidence at protein level	m7GpppX diphosphatase	1	0.999	5	9	9	9	0	0	0	0	4	2	3	0	0	0	0	0	0	0	0	0	0	0	4	2	3	0	0	0	0	0	0	0	0	0	0	0	4	2	3
sp|Q9DB15|RM12_MOUSE	Q9DB15	RM12_MOUSE	Mrpl12	201	38.8	Mus musculus OX=10090	1:Experimental evidence at protein level	39S ribosomal protein L12, mitochondrial	1	0.999	8	40	40	40	4	4	3	0	7	8	7	1	3	3	0	0	0	0	4	4	3	0	7	8	7	1	3	3	0	0	0	0	4	4	3	0	7	8	7
sp|Q9DB20|ATPO_MOUSE	Q9DB20	ATPO_MOUSE	Atp5po	213	60.6	Mus musculus OX=10090	1:Experimental evidence at protein level	ATP synthase subunit O, mitochondrial	1	0.999	13	171	171	171	13	15	13	12	14	15	15	13	13	12	11	8	8	9	13	15	13	12	14	15	15	13	13	12	11	8	8	9	13	15	13	12	14	15	15
sp|Q9DB25|ALG5_MOUSE	Q9DB25	ALG5_MOUSE	Alg5	324	7.7	Mus musculus OX=10090	1:Experimental evidence at protein level	Dolichyl-phosphate beta-glucosyltransferase	1	0.999	2	4	4	4	0	0	0	0	2	1	1	0	0	0	0	0	0	0	0	0	0	0	2	1	1	0	0	0	0	0	0	0	0	0	0	0	2	1	1
sp|Q9DB26|PHYD1_MOUSE	Q9DB26	PHYD1_MOUSE	Phyhd1	291	10	Mus musculus OX=10090	1:Experimental evidence at protein level	Phytanoyl-CoA dioxygenase domain-containing protein 1	1	0.999	2	4	4	4	0	0	0	0	1	2	1	0	0	0	0	0	0	0	0	0	0	0	1	2	1	0	0	0	0	0	0	0	0	0	0	0	1	2	1
sp|Q9DB29|IAH1_MOUSE	Q9DB29	IAH1_MOUSE	Iah1	249	39.8	Mus musculus OX=10090	1:Experimental evidence at protein level	Isoamyl acetate-hydrolyzing esterase 1 homolog	1	0.999	7	34	34	34	2	1	2	1	5	2	2	3	6	6	1	1	1	1	2	1	2	1	5	2	2	3	6	6	1	1	1	1	2	1	2	1	5	2	2
sp|Q9DB77|QCR2_MOUSE	Q9DB77	QCR2_MOUSE	Uqcrc2	453	49.9	Mus musculus OX=10090	1:Experimental evidence at protein level	Cytochrome b-c1 complex subunit 2, mitochondrial	1	0.999	21	239	239	239	19	18	17	17	29	24	26	14	18	15	12	7	10	13	19	18	17	17	29	24	26	14	18	15	12	7	10	13	19	18	17	17	29	24	26
sp|Q9DBA8|HUTI_MOUSE	Q9DBA8	HUTI_MOUSE	Amdhd1	426	52.8	Mus musculus OX=10090	1:Experimental evidence at protein level	Probable imidazolonepropionase	1	0.999	17	114	114	114	10	9	9	4	18	12	17	2	10	7	5	1	5	5	10	9	9	4	18	12	17	2	10	7	5	1	5	5	10	9	9	4	18	12	17
sp|Q9DBB8|DHDH_MOUSE	Q9DBB8	DHDH_MOUSE	Dhdh	333	36.9	Mus musculus OX=10090	1:Experimental evidence at protein level	Trans-1,2-dihydrobenzene-1,2-diol dehydrogenase	1	0.999	10	70	70	70	6	4	5	5	9	8	8	6	5	6	2	2	2	2	6	4	5	5	9	8	8	6	5	6	2	2	2	2	6	4	5	5	9	8	8
sp|Q9DBC0|SELO_MOUSE	Q9DBC0	SELO_MOUSE	Selenoo	667	8.4	Mus musculus OX=10090	1:Experimental evidence at protein level	Protein adenylyltransferase SelO, mitochondrial	1	0.999	4	11	11	11	0	0	0	0	2	3	4	0	1	1	0	0	0	0	0	0	0	0	2	3	4	0	1	1	0	0	0	0	0	0	0	0	2	3	4
sp|Q9DBD0|ICA_MOUSE	Q9DBD0	ICA_MOUSE	Ica	700	6.3	Mus musculus OX=10090	1:Experimental evidence at protein level	Inhibitor of carbonic anhydrase	1	0.999	4	10	10	19	1	1	1	1	2	3	1	0	0	0	0	0	0	0	1	1	1	1	2	3	1	0	0	0	0	0	0	0	1	1	2	1	3	4	2
sp|Q9DBE0|CSAD_MOUSE	Q9DBE0	CSAD_MOUSE	Csad	493	41.4	Mus musculus OX=10090	1:Experimental evidence at protein level	Cysteine sulfinic acid decarboxylase	1	0.999	14	59	59	59	1	2	1	8	7	9	9	6	7	9	0	0	0	0	1	2	1	8	7	9	9	6	7	9	0	0	0	0	1	2	1	8	7	9	9
sp|Q9DBF1|AL7A1_MOUSE	Q9DBF1	AL7A1_MOUSE	Aldh7a1	539	40.3	Mus musculus OX=10090	1:Experimental evidence at protein level	Alpha-aminoadipic semialdehyde dehydrogenase	1	0.999	21	226	226	226	19	19	19	18	21	25	24	13	18	17	9	4	9	11	19	19	19	18	21	25	24	13	18	17	9	4	9	11	19	19	19	18	21	25	24
sp|Q9DBG1|CP27A_MOUSE	Q9DBG1	CP27A_MOUSE	Cyp27a1	533	57.8	Mus musculus OX=10090	1:Experimental evidence at protein level	Sterol 26-hydroxylase, mitochondrial	1	0.999	20	126	126	126	4	7	6	12	13	18	17	11	12	11	2	5	5	3	4	7	6	12	13	18	17	11	12	11	2	5	5	3	4	7	6	12	13	18	17
sp|Q9DBG3|AP2B1_MOUSE	Q9DBG3	AP2B1_MOUSE	Ap2b1	937	20.9	Mus musculus OX=10090	1:Experimental evidence at protein level	AP-2 complex subunit beta	1	0.999	18	82	41	82	5	5	3	6	13	11	10	5	8	10	2	1	1	2	2	2	2	3	7	7	6	2	3	4	1	0	1	1	5	5	3	6	13	11	10
sp|Q9DBG5|PLIN3_MOUSE	Q9DBG5	PLIN3_MOUSE	Plin3	437	19.5	Mus musculus OX=10090	1:Experimental evidence at protein level	Perilipin-3	1	0.999	6	17	17	17	0	0	0	0	5	4	6	1	0	1	0	0	0	0	0	0	0	0	5	4	6	1	0	1	0	0	0	0	0	0	0	0	5	4	6
sp|Q9DBG6|RPN2_MOUSE	Q9DBG6	RPN2_MOUSE	Rpn2	631	42.2	Mus musculus OX=10090	1:Experimental evidence at protein level	Dolichyl-diphosphooligosaccharide--protein glycosyltransferase subunit 2	1	0.999	16	115	115	115	10	8	9	7	11	11	14	7	10	7	6	4	6	5	10	8	9	7	11	11	14	7	10	7	6	4	6	5	10	8	9	7	11	11	14
sp|Q9DBG7|SRPRA_MOUSE	Q9DBG7	SRPRA_MOUSE	Srpra	636	25.2	Mus musculus OX=10090	1:Experimental evidence at protein level	Signal recognition particle receptor subunit alpha	1	0.999	9	33	33	33	2	1	2	4	5	6	6	3	2	2	0	0	0	0	2	1	2	4	5	6	6	3	2	2	0	0	0	0	2	1	2	4	5	6	6
sp|Q9DBH5|LMAN2_MOUSE	Q9DBH5	LMAN2_MOUSE	Lman2	358	33	Mus musculus OX=10090	1:Experimental evidence at protein level	Vesicular integral-membrane protein VIP36	1	0.999	10	51	51	51	4	4	5	5	7	6	8	4	3	3	0	0	2	0	4	4	5	5	7	6	8	4	3	3	0	0	2	0	4	4	5	5	7	6	8
sp|Q9DBK0|ACO12_MOUSE	Q9DBK0	ACO12_MOUSE	Acot12	556	23	Mus musculus OX=10090	1:Experimental evidence at protein level	Acetyl-coenzyme A thioesterase	1	0.999	8	22	22	22	0	1	1	1	4	5	6	2	0	2	0	0	0	0	0	1	1	1	4	5	6	2	0	2	0	0	0	0	0	1	1	1	4	5	6
sp|Q9DBL1|ACDSB_MOUSE	Q9DBL1	ACDSB_MOUSE	Acadsb	432	29.6	Mus musculus OX=10090	1:Experimental evidence at protein level	Short/branched chain specific acyl-CoA dehydrogenase, mitochondrial	1	0.999	10	75	75	75	7	8	6	5	10	8	12	3	7	5	0	1	2	1	7	8	6	5	10	8	12	3	7	5	0	1	2	1	7	8	6	5	10	8	12
sp|Q9DBL7|COASY_MOUSE	Q9DBL7	COASY_MOUSE	Coasy	563	20.6	Mus musculus OX=10090	1:Experimental evidence at protein level	Bifunctional coenzyme A synthase	1	0.999	11	72	72	72	6	7	6	8	7	8	8	7	4	4	2	1	2	2	6	7	6	8	7	8	8	7	4	4	2	1	2	2	6	7	6	8	7	8	8
sp|Q9DBM2|ECHP_MOUSE	Q9DBM2	ECHP_MOUSE	Ehhadh	718	64.9	Mus musculus OX=10090	1:Experimental evidence at protein level	Peroxisomal bifunctional enzyme	1	0.999	42	423	423	423	31	33	31	37	38	51	48	29	27	31	17	14	20	16	31	33	31	37	38	51	48	29	27	31	17	14	20	16	31	33	31	37	38	51	48
sp|Q9DBN5|LONP2_MOUSE	Q9DBN5	LONP2_MOUSE	Lonp2	852	10	Mus musculus OX=10090	1:Experimental evidence at protein level	Lon protease homolog 2, peroxisomal	1	0.999	9	20	20	20	0	1	1	2	4	3	4	1	2	2	0	0	0	0	0	1	1	2	4	3	4	1	2	2	0	0	0	0	0	1	1	2	4	3	4
sp|Q9DBP5|KCY_MOUSE	Q9DBP5	KCY_MOUSE	Cmpk1	196	46.4	Mus musculus OX=10090	1:Experimental evidence at protein level	UMP-CMP kinase	1	0.999	9	56	56	56	4	5	4	5	8	8	7	4	6	4	1	0	0	0	4	5	4	5	8	8	7	4	6	4	1	0	0	0	4	5	4	5	8	8	7
sp|Q9DBR0|AKAP8_MOUSE	Q9DBR0	AKAP8_MOUSE	Akap8	687	3.2	Mus musculus OX=10090	1:Experimental evidence at protein level	A-kinase anchor protein 8	1	0.999	2	4	4	4	0	0	0	0	1	2	1	0	0	0	0	0	0	0	0	0	0	0	1	2	1	0	0	0	0	0	0	0	0	0	0	0	1	2	1
sp|Q9DBR7|MYPT1_MOUSE	Q9DBR7	MYPT1_MOUSE	Ppp1r12a	1029	5	Mus musculus OX=10090	1:Experimental evidence at protein level	Protein phosphatase 1 regulatory subunit 12A	1	0.999	3	8	8	8	0	1	1	1	2	1	2	0	0	0	0	0	0	0	0	1	1	1	2	1	2	0	0	0	0	0	0	0	0	1	1	1	2	1	2
sp|Q9DBT9|M2GD_MOUSE	Q9DBT9	M2GD_MOUSE	Dmgdh	869	65.7	Mus musculus OX=10090	1:Experimental evidence at protein level	Dimethylglycine dehydrogenase, mitochondrial	1	0.999	46	502	502	502	39	39	36	36	52	55	52	34	35	36	25	20	20	23	39	39	36	36	52	55	52	34	35	36	25	20	20	23	39	39	36	36	52	55	52
sp|Q9DBW0|CP4V2_MOUSE	Q9DBW0	CP4V2_MOUSE	Cyp4v2	525	13.9	Mus musculus OX=10090	1:Experimental evidence at protein level	Cytochrome P450 4V2	1	0.999	7	28	28	28	1	3	1	1	8	4	5	1	2	2	0	0	0	0	1	3	1	1	8	4	5	1	2	2	0	0	0	0	1	3	1	1	8	4	5
sp|Q9DC50|OCTC_MOUSE	Q9DC50	OCTC_MOUSE	Crot	612	32.7	Mus musculus OX=10090	1:Experimental evidence at protein level	Peroxisomal carnitine O-octanoyltransferase	1	0.999	19	126	126	126	10	7	10	8	13	14	17	11	11	15	3	2	3	2	10	7	10	8	13	14	17	11	11	15	3	2	3	2	10	7	10	8	13	14	17
sp|Q9DC61|MPPA_MOUSE	Q9DC61	MPPA_MOUSE	Pmpca	524	19.7	Mus musculus OX=10090	1:Experimental evidence at protein level	Mitochondrial-processing peptidase subunit alpha	1	0.999	10	22	22	22	1	2	1	1	6	6	2	1	1	1	0	0	0	0	1	2	1	1	6	6	2	1	1	1	0	0	0	0	1	2	1	1	6	6	2
sp|Q9DC69|NDUA9_MOUSE	Q9DC69	NDUA9_MOUSE	Ndufa9	377	43	Mus musculus OX=10090	1:Experimental evidence at protein level	NADH dehydrogenase [ubiquinone] 1 alpha subcomplex subunit 9, mitochondrial	1	0.999	14	105	105	105	8	6	10	3	14	13	12	9	10	8	4	1	2	5	8	6	10	3	14	13	12	9	10	8	4	1	2	5	8	6	10	3	14	13	12
sp|Q9DC70|NDUS7_MOUSE	Q9DC70	NDUS7_MOUSE	Ndufs7	224	34.8	Mus musculus OX=10090	1:Experimental evidence at protein level	NADH dehydrogenase [ubiquinone] iron-sulfur protein 7, mitochondrial	1	0.999	7	62	62	62	6	4	5	4	9	8	8	6	4	5	1	0	1	1	6	4	5	4	9	8	8	6	4	5	1	0	1	1	6	4	5	4	9	8	8
sp|Q9DC71|RT15_MOUSE	Q9DC71	RT15_MOUSE	Mrps15	258	9.3	Mus musculus OX=10090	1:Experimental evidence at protein level	28S ribosomal protein S15, mitochondrial	1	0.999	2	3	3	3	0	0	0	0	1	2	0	0	0	0	0	0	0	0	0	0	0	0	1	2	0	0	0	0	0	0	0	0	0	0	0	0	1	2	0
sp|Q9DCC4|P5CR3_MOUSE	Q9DCC4	P5CR3_MOUSE	Pycr3	274	18.2	Mus musculus OX=10090	1:Experimental evidence at protein level	Pyrroline-5-carboxylate reductase 3	1	0.999	2	18	18	18	2	2	2	2	2	2	2	2	1	1	0	0	0	0	2	2	2	2	2	2	2	2	1	1	0	0	0	0	2	2	2	2	2	2	2
sp|Q9DCC8|TOM20_MOUSE	Q9DCC8	TOM20_MOUSE	Tomm20	145	22.8	Mus musculus OX=10090	1:Experimental evidence at protein level	Mitochondrial import receptor subunit TOM20 homolog	1	0.999	2	6	6	6	1	1	0	0	1	1	1	0	1	0	0	0	0	0	1	1	0	0	1	1	1	0	1	0	0	0	0	0	1	1	0	0	1	1	1
sp|Q9DCD0|6PGD_MOUSE	Q9DCD0	6PGD_MOUSE	Pgd	483	14.3	Mus musculus OX=10090	1:Experimental evidence at protein level	6-phosphogluconate dehydrogenase, decarboxylating	1	0.999	6	16	16	16	0	0	0	0	3	3	3	1	3	3	0	0	0	0	0	0	0	0	3	3	3	1	3	3	0	0	0	0	0	0	0	0	3	3	3
sp|Q9DCG6|PBLD1_MOUSE	Q9DCG6	PBLD1_MOUSE	Pbld1	288	67	Mus musculus OX=10090	1:Experimental evidence at protein level	Phenazine biosynthesis-like domain-containing protein 1	1	0.999	16	137	84	137	10	9	9	11	14	13	12	13	12	13	6	5	4	6	6	6	5	6	10	9	9	8	7	8	3	2	2	3	10	9	9	11	14	13	12
sp|Q9DCH4|EIF3F_MOUSE	Q9DCH4	EIF3F_MOUSE	Eif3f	361	27.1	Mus musculus OX=10090	1:Experimental evidence at protein level	Eukaryotic translation initiation factor 3 subunit F	1	0.999	7	40	40	40	3	4	3	3	5	6	5	2	4	4	1	0	0	0	3	4	3	3	5	6	5	2	4	4	1	0	0	0	3	4	3	3	5	6	5
sp|Q9DCJ5|NDUA8_MOUSE	Q9DCJ5	NDUA8_MOUSE	Ndufa8	172	28.5	Mus musculus OX=10090	1:Experimental evidence at protein level	NADH dehydrogenase [ubiquinone] 1 alpha subcomplex subunit 8	1	0.999	3	30	30	30	3	3	3	3	3	3	3	2	3	2	1	0	0	1	3	3	3	3	3	3	3	2	3	2	1	0	0	1	3	3	3	3	3	3	3
sp|Q9DCL9|PUR6_MOUSE	Q9DCL9	PUR6_MOUSE	Paics	425	12.9	Mus musculus OX=10090	1:Experimental evidence at protein level	Multifunctional protein ADE2	1	0.999	6	29	29	29	3	1	3	2	3	5	4	2	3	3	0	0	0	0	3	1	3	2	3	5	4	2	3	3	0	0	0	0	3	1	3	2	3	5	4
sp|Q9DCM0|ETHE1_MOUSE	Q9DCM0	ETHE1_MOUSE	Ethe1	254	12.2	Mus musculus OX=10090	1:Experimental evidence at protein level	Persulfide dioxygenase ETHE1, mitochondrial	1	0.999	2	8	8	8	0	0	0	0	1	1	1	2	1	2	0	0	0	0	0	0	0	0	1	1	1	2	1	2	0	0	0	0	0	0	0	0	1	1	1
sp|Q9DCM2|GSTK1_MOUSE	Q9DCM2	GSTK1_MOUSE	Gstk1	226	71.2	Mus musculus OX=10090	1:Experimental evidence at protein level	Glutathione S-transferase kappa 1	1	0.999	17	123	123	123	8	9	10	10	19	16	17	7	10	6	3	2	3	3	8	9	10	10	19	16	17	7	10	6	3	2	3	3	8	9	10	10	19	16	17
sp|Q9DCN1|NUD12_MOUSE	Q9DCN1	NUD12_MOUSE	Nudt12	462	20.8	Mus musculus OX=10090	1:Experimental evidence at protein level	NAD-capped RNA hydrolase NUDT12	1	0.999	10	33	33	33	1	2	1	1	5	7	7	2	3	4	0	0	0	0	1	2	1	1	5	7	7	2	3	4	0	0	0	0	1	2	1	1	5	7	7
sp|Q9DCN2|NB5R3_MOUSE	Q9DCN2	NB5R3_MOUSE	Cyb5r3	301	57.5	Mus musculus OX=10090	1:Experimental evidence at protein level	NADH-cytochrome b5 reductase 3	1	0.999	19	187	187	187	13	11	14	14	21	18	16	16	15	13	9	8	9	10	13	11	14	14	21	18	16	16	15	13	9	8	9	10	13	11	14	14	21	18	16
sp|Q9DCP2|S38A3_MOUSE	Q9DCP2	S38A3_MOUSE	Slc38a3	505	10.1	Mus musculus OX=10090	1:Experimental evidence at protein level	Sodium-coupled neutral amino acid transporter 3	1	0.999	5	33	33	33	3	2	3	2	5	3	3	1	2	3	2	0	2	2	3	2	3	2	5	3	3	1	2	3	2	0	2	2	3	2	3	2	5	3	3
sp|Q9DCQ2|ASPD_MOUSE	Q9DCQ2	ASPD_MOUSE	Aspdh	287	44.3	Mus musculus OX=10090	1:Experimental evidence at protein level	Putative L-aspartate dehydrogenase	1	0.999	11	61	61	61	5	4	4	5	10	10	9	2	3	5	2	0	1	1	5	4	4	5	10	10	9	2	3	5	2	0	1	1	5	4	4	5	10	10	9
sp|Q9DCS2|MTL26_MOUSE	Q9DCS2	MTL26_MOUSE	Mettl26	204	44.6	Mus musculus OX=10090	1:Experimental evidence at protein level	Methyltransferase-like 26	1	0.999	5	17	17	17	1	1	1	1	2	3	2	3	2	1	0	0	0	0	1	1	1	1	2	3	2	3	2	1	0	0	0	0	1	1	1	1	2	3	2
sp|Q9DCS3|MECR_MOUSE	Q9DCS3	MECR_MOUSE	Mecr	373	13.9	Mus musculus OX=10090	1:Experimental evidence at protein level	Enoyl-[acyl-carrier-protein] reductase, mitochondrial	1	0.999	4	24	24	24	2	1	3	3	4	4	5	0	1	1	0	0	0	0	2	1	3	3	4	4	5	0	1	1	0	0	0	0	2	1	3	3	4	4	5
sp|Q9DCS9|NDUBA_MOUSE	Q9DCS9	NDUBA_MOUSE	Ndufb10	176	54	Mus musculus OX=10090	1:Experimental evidence at protein level	NADH dehydrogenase [ubiquinone] 1 beta subcomplex subunit 10	1	0.999	8	60	60	60	5	5	5	3	7	6	6	8	5	5	1	1	1	2	5	5	5	3	7	6	6	8	5	5	1	1	1	2	5	5	5	3	7	6	6
sp|Q9DCT1|AKCL2_MOUSE	Q9DCT1	AKCL2_MOUSE	Akr1e2	301	13.6	Mus musculus OX=10090	1:Experimental evidence at protein level	1,5-anhydro-D-fructose reductase	1	0.999	4	8	8	8	0	1	1	1	1	0	1	0	2	1	0	0	0	0	0	1	1	1	1	0	1	0	2	1	0	0	0	0	0	1	1	1	1	0	1
sp|Q9DCT2|NDUS3_MOUSE	Q9DCT2	NDUS3_MOUSE	Ndufs3	263	54	Mus musculus OX=10090	1:Experimental evidence at protein level	NADH dehydrogenase [ubiquinone] iron-sulfur protein 3, mitochondrial	1	0.999	16	96	96	96	7	7	8	5	12	8	12	10	6	9	4	2	3	3	7	7	8	5	12	8	12	10	6	9	4	2	3	3	7	7	8	5	12	8	12
sp|Q9DCT8|CRIP2_MOUSE	Q9DCT8	CRIP2_MOUSE	Crip2	208	32.7	Mus musculus OX=10090	1:Experimental evidence at protein level	Cysteine-rich protein 2	1	0.999	4	15	15	15	1	0	0	0	4	5	4	0	0	1	0	0	0	0	1	0	0	0	4	5	4	0	0	1	0	0	0	0	1	0	0	0	4	5	4
sp|Q9DCU6|RM04_MOUSE	Q9DCU6	RM04_MOUSE	Mrpl4	294	11.6	Mus musculus OX=10090	1:Experimental evidence at protein level	39S ribosomal protein L4, mitochondrial	1	0.999	3	6	6	6	0	0	0	0	3	1	2	0	0	0	0	0	0	0	0	0	0	0	3	1	2	0	0	0	0	0	0	0	0	0	0	0	3	1	2
sp|Q9DCU9|HOGA1_MOUSE	Q9DCU9	HOGA1_MOUSE	Hoga1	321	26.8	Mus musculus OX=10090	1:Experimental evidence at protein level	4-hydroxy-2-oxoglutarate aldolase, mitochondrial	1	0.999	7	62	62	62	4	3	4	4	7	7	7	5	5	5	2	3	3	3	4	3	4	4	7	7	7	5	5	5	2	3	3	3	4	3	4	4	7	7	7
sp|Q9DCV4|RMD1_MOUSE	Q9DCV4	RMD1_MOUSE	Rmdn1	305	26.9	Mus musculus OX=10090	1:Experimental evidence at protein level	Regulator of microtubule dynamics protein 1	1	0.999	8	31	31	31	2	2	3	1	5	5	5	1	4	3	0	0	0	0	2	2	3	1	5	5	5	1	4	3	0	0	0	0	2	2	3	1	5	5	5
sp|Q9DCW4|ETFB_MOUSE	Q9DCW4	ETFB_MOUSE	Etfb	255	58	Mus musculus OX=10090	1:Experimental evidence at protein level	Electron transfer flavoprotein subunit beta	1	0.999	16	211	211	211	15	14	15	16	20	17	20	12	16	14	14	12	13	13	15	14	15	16	20	17	20	12	16	14	14	12	13	13	15	14	15	16	20	17	20
sp|Q9DCX2|ATP5H_MOUSE	Q9DCX2	ATP5H_MOUSE	Atp5pd	161	73.9	Mus musculus OX=10090	1:Experimental evidence at protein level	ATP synthase subunit d, mitochondrial	1	0.999	16	153	153	153	12	12	12	12	17	13	15	10	10	9	9	6	8	8	12	12	12	12	17	13	15	10	10	9	9	6	8	8	12	12	12	12	17	13	15
sp|Q9DCX8|IYD1_MOUSE	Q9DCX8	IYD1_MOUSE	Iyd	285	17.5	Mus musculus OX=10090	1:Experimental evidence at protein level	Iodotyrosine deiodinase 1	1	0.999	5	21	21	21	1	2	0	1	4	3	3	3	1	3	0	0	0	0	1	2	0	1	4	3	3	3	1	3	0	0	0	0	1	2	0	1	4	3	3
sp|Q9DCY0|KEG1_MOUSE	Q9DCY0	KEG1_MOUSE	Keg1	295	46.4	Mus musculus OX=10090	1:Experimental evidence at protein level	Glycine N-acyltransferase-like protein Keg1	1	0.999	11	85	85	85	5	5	6	6	10	9	9	7	7	7	3	3	4	4	5	5	6	6	10	9	9	7	7	7	3	3	4	4	5	5	6	6	10	9	9
sp|Q9DCZ4|MIC26_MOUSE	Q9DCZ4	MIC26_MOUSE	Apoo	198	24.2	Mus musculus OX=10090	1:Experimental evidence at protein level	MIC	1	0.999	4	11	11	11	1	0	0	0	1	1	2	1	3	1	0	0	0	1	1	0	0	0	1	1	2	1	3	1	0	0	0	1	1	0	0	0	1	1	2
sp|Q9DD20|MET7B_MOUSE	Q9DD20	MET7B_MOUSE	Mettl7b	244	50.4	Mus musculus OX=10090	1:Experimental evidence at protein level	Thiol S-methyltransferase METTL7B	1	0.999	14	126	126	126	9	10	9	10	10	12	10	12	11	9	5	7	6	6	9	10	9	10	10	12	10	12	11	9	5	7	6	6	9	10	9	10	10	12	10
sp|Q9EP69|SAC1_MOUSE	Q9EP69	SAC1_MOUSE	Sacm1l	587	28.1	Mus musculus OX=10090	1:Experimental evidence at protein level	Phosphatidylinositol-3-phosphatase SAC1	1	0.999	14	63	63	63	5	5	4	5	11	11	11	4	2	2	1	0	1	1	5	5	4	5	11	11	11	4	2	2	1	0	1	1	5	5	4	5	11	11	11
sp|Q9EP75|CP4FE_MOUSE	Q9EP75	CP4FE_MOUSE	Cyp4f14	524	18.9	Mus musculus OX=10090	1:Experimental evidence at protein level	Leukotriene-B4 omega-hydroxylase 3	1	0.999	12	39	26	39	2	1	2	2	8	8	7	4	3	2	0	0	0	0	1	0	1	1	7	6	5	2	2	1	0	0	0	0	2	1	2	2	8	8	7
sp|Q9EP89|LACTB_MOUSE	Q9EP89	LACTB_MOUSE	Lactb	551	19.4	Mus musculus OX=10090	1:Experimental evidence at protein level	Serine beta-lactamase-like protein LACTB, mitochondrial	1	0.999	10	32	32	32	2	2	2	3	6	5	4	3	2	3	0	0	0	0	2	2	2	3	6	5	4	3	2	3	0	0	0	0	2	2	2	3	6	5	4
sp|Q9EPC1|PARVA_MOUSE	Q9EPC1	PARVA_MOUSE	Parva	372	8.1	Mus musculus OX=10090	1:Experimental evidence at protein level	Alpha-parvin	1	0.999	2	10	10	10	0	0	0	0	2	2	2	0	2	2	0	0	0	0	0	0	0	0	2	2	2	0	2	2	0	0	0	0	0	0	0	0	2	2	2
[truncated: 1,442 more rows]
[truncated: 92 more columns]

## Sheet: Table_S2
Protein	Protein ID	Entry Name	Gene	Protein Length	Coverage	Organism	Protein Existence	Description	Protein Probability	Top Peptide Probability	Combined Total Peptides	Combined Spectral Count	Combined Unique Spectral Count	Combined Total Spectral Count	DDM0pt1_1 Spectral Count	DDM0pt1_2 Spectral Count	DDM0pt1_3 Spectral Count	DDM0pt5_1 Spectral Count	DDM0pt5_2 Spectral Count	DDM0pt5_3 Spectral Count	PMax0pt1_1 Spectral Count	PMax0pt1_2 Spectral Count	PMax0pt1_3 Spectral Count	PMax0pt5_1 Spectral Count	PMax0pt5_2 Spectral Count	PMax0pt5_3 Spectral Count	Rapi0pt1_1 Spectral Count	Rapi0pt1_2 Spectral Count	Rapi0pt1_3 Spectral Count	Rapi0pt5_1 Spectral Count	Rapi0pt5_2 Spectral Count	Rapi0pt5_3 Spectral Count	DDM0pt1_1 Unique Spectral Count	DDM0pt1_2 Unique Spectral Count	DDM0pt1_3 Unique Spectral Count	DDM0pt5_1 Unique Spectral Count	DDM0pt5_2 Unique Spectral Count	DDM0pt5_3 Unique Spectral Count	PMax0pt1_1 Unique Spectral Count	PMax0pt1_2 Unique Spectral Count	PMax0pt1_3 Unique Spectral Count	PMax0pt5_1 Unique Spectral Count	PMax0pt5_2 Unique Spectral Count	PMax0pt5_3 Unique Spectral Count	Rapi0pt1_1 Unique Spectral Count	Rapi0pt1_2 Unique Spectral Count	Rapi0pt1_3 Unique Spectral Count	Rapi0pt5_1 Unique Spectral Count	Rapi0pt5_2 Unique Spectral Count
[truncated: 2,333 more rows]
[truncated: 128 more columns]

[truncated: 1 more sheets: Table_S3]
